# Supplementary material for: Abundant non-canonical DNA viruses in seawater revealed by high-throughput single particle sequencing
Source: Research Square preprint supplement (doi:10.21203/rs.3.rs-6227375/v1), 2025-03-26
Supplement: Supplementary file 1 [file 15f1a9ec2df85102bdca277f.xlsx]

## Sheet: TableofContents
Table number	Short label	Content
Table S1	marine emSAG info	assembly information on marine emSAGs including entity status, best hit to reference virus for virus-like emSAGs, vOTU cluster, read mapping, virus presence in cell-like emSAG
Table S2	vMAG info	assembly information on vMAGs inlcuding virus-like status, vOTU cluster
Table S3	cSAG vSAG info	assembly information on marine emSAGs including entity status, best hit to reference virus for virus-like SAGs
Table S4	co-barcode asses	assembly information and QUAST results for emSAGs of both the seawater (marine) and E. coli spike with designation of 'marine', 'Ecoli', or 'mixed' specified
Table S5	Ecoli emSAG info	assembly information on E. coli emSAGs including entity status used for Fig 1a
Table S6	vOTU info	composition of vOTUs
Table S7	Fig3e info	first dataframe contains sequences IDs of emSAGs and vMAG aligned in Fig. 3e; second dataframe contains number of reads mapped to emSAG Capsule1_01191918 contig 1
Table S8	Fig3d nucmer	nucmer output used to draw alignment by nucmer in Fig3d with emSAG and vMAGs listed
Table S9	vContact2 clusters	vContact2 cluster output - format retained from tool output
Table S10	Noamivir OrthoFinder	Orthofinder orthogroup (OG) number with column designating function of interest and the genes listed with that OG
Table S11	coassem emSAG comp	alignment statistics of emSAGs that contribute to coassemblies A and B
Table S12	coasse cSAG aln	alignment statistics of coassemblies A and B to cSAGs from the Gulf of Maine study by Munson-McGee et al 2022 Nature
Table S13	Fig4c genoplot	Genoplot table used for Fig4c that contains emSAG names shown in figure
Table S14	DNApol vrsinpha cdhit	CD-Hit output clstr output from clustering DNA polymerase gene sequences from Viral RefSeq (VRS) and INPHARED (inpha) - with starred sequences used as representative

## Sheet: Table_S1 marine emSAG info
genome	Raw_readcount	Normalized_readcount	Raw_contig_count	untrimmed_min1kb_contigs	Final_contig_count	untrimmed_min1kb_length	final_assembly_length	gc_content	checkm1_est_genome_completeness	gen_code	num_prots	classification_via_GTDBTk	Domain	Phylum	Class	Order	Family	Genus	Species	nog_arch_gen	nog_bact_gen	nog_euk_gen	nog_vir_gen	nog_prok_gen	nog_cell_gen	no_nog_prot	prop_cellgen	hqviral_contigs	virlike_contigs	nonvirlike_conitgs	virtotal_contigs	prop_virtotal_contigs	hqviral_len	virlike_len	virtotal_len	nonvirlike_len	prop_virtotal_len	nogcell_vir_ratio	entity	virus_pres	mge_integr_excis_genes	mge_phage_genes	mge_repli_recomb_repair_genes	stabil_transf_defense_genes	transfer_genes	jc_checkv_quality	jc_checkv_completeness	jc_checkv_completeness_method	jc_checkv_warnings
Capsule1_16040317	292677	50512	299	79	79	404917	373317	30.89	31.8	11	476	d__Bacteria;p__Proteobacteria;c__Alphaproteobacteria;o__Pelagibacterales;f__Pelagibacteraceae;g__Pelagibacter;s__Pelagibacter ubique	Bacteria	Proteobacteria	Alphaproteobacteria	Pelagibacterales	Pelagibacteraceae	Pelagibacter	Pelagibacter ubique	52	227	116	12	279	395	69	0.829832	8	13	58	21	0.265823	45505	63915	109420	295497	0.270228	3.07086	cell-like	yes	6	29	21	8	20	Medium-quality	61.75	AAI-based (high-confidence)	contig >1.5x longer than expected genome length; low-confidence Provirus
Capsule1_22230519	285362	69860	527	152	152	632248	571448	30.82	34.86	11	772	d__Bacteria;p__Proteobacteria;c__Gammaproteobacteria;o__GCA-002705445;f__GCA-002705445;g__GCA-2705445;s__GCA-2705445 sp018674175	Bacteria	Proteobacteria	Gammaproteobacteria	GCA-002705445	GCA-002705445	GCA-2705445	GCA-2705445 sp018674175	82	399	166	15	481	647	110	0.838083	11	23	118	34	0.223684	42396	107772	150168	482080	0.237514	3.52856	cell-like	yes	11	32	44	11	21	Medium-quality	70.31	HMM-based (lower-bound)	NA
Capsule1_03230513	619388	138327	626	178	177	1134752	1062952	39.82	47.03	11	1158	d__Bacteria;p__Bacteroidota;c__Bacteroidia;o__Flavobacteriales;f__Flavobacteriaceae;g__UBA7428;s__	Bacteria	Bacteroidota	Bacteroidia	Flavobacteriales	Flavobacteriaceae	UBA7428	Unknown_spp	111	677	205	8	788	993	157	0.857513	5	19	154	24	0.134831	35150	60149	95299	1039453	0.0839822	10.2106	cell-like	yes	17	38	63	21	38	Low-quality	44.86	HMM-based (lower-bound)	NA
Capsule1_14051714	239494	79247	847	189	188	757835	681635	30.01	38.03	11	773	d__Bacteria;p__Bacteroidota;c__Bacteroidia;o__Flavobacteriales;f__Flavobacteriaceae;g__MAG-121220-bin8;s__MAG-121220-bin8 sp905182765	Bacteria	Bacteroidota	Bacteroidia	Flavobacteriales	Flavobacteriaceae	MAG-121220-bin8	MAG-121220-bin8 sp905182765	99	421	157	11	520	677	85	0.875809	10	44	135	54	0.285714	30749	222288	253037	498054	0.333895	2.62301	cell-like	yes	12	32	28	12	20	Low-quality	11.59	HMM-based (lower-bound)	NA
Capsule1_22171216	243844	77113	936	219	218	777906	689706	30.03	32.84	11	818	d__Bacteria;p__Bacteroidota;c__Bacteroidia;o__Flavobacteriales;f__Flavobacteriaceae;g__MAG-121220-bin8;s__MAG-121220-bin8 sp902510655	Bacteria	Bacteroidota	Bacteroidia	Flavobacteriales	Flavobacteriaceae	MAG-121220-bin8	MAG-121220-bin8 sp902510655	95	443	158	7	538	696	115	0.850856	8	58	153	66	0.30137	29613	209562	239175	538458	0.30746	2.76737	cell-like	yes	4	26	30	9	19	Medium-quality	82.43	HMM-based (lower-bound)	NA
Capsule1_17032320	224156	62551	747	135	135	587320	533320	30.23	27.59	11	595	d__Bacteria;p__Bacteroidota;c__Bacteroidia;o__Flavobacteriales;f__Flavobacteriaceae;g__MAG-121220-bin8;s__MAG-121220-bin8 sp905182765	Bacteria	Bacteroidota	Bacteroidia	Flavobacteriales	Flavobacteriaceae	MAG-121220-bin8	MAG-121220-bin8 sp905182765	72	333	126	4	405	531	60	0.892437	7	31	97	38	0.281481	28684	119668	148352	438968	0.252591	3.53312	cell-like	yes	6	23	32	7	12	Not-determined	0	NA	no viral genes detected
Capsule1_03110721	288668	28132	120	50	50	222866	202866	37.33	8.78	11	243	0	0	0	0	0	0	0	0	24	127	58	4	151	209	30	0.860082	4	5	41	9	0.18	23879	10101	33980	188886	0.152468	5.64106	cell-like	yes	1	6	12	4	8	Not-determined	0	NA	no viral genes detected
Capsule1_08100506	259637	68090	618	154	154	638754	577154	30.08	19.31	11	669	d__Bacteria;p__Bacteroidota;c__Bacteroidia;o__Flavobacteriales;f__Flavobacteriaceae;g__MAG-121220-bin8;s__	Bacteria	Bacteroidota	Bacteroidia	Flavobacteriales	Flavobacteriaceae	MAG-121220-bin8	Unknown_spp	88	366	127	4	454	581	84	0.86846	10	48	96	58	0.376623	23356	247637	270993	365441	0.424253	2.04704	cell-like	yes	2	25	34	13	18	High-quality	100	HMM-based (lower-bound)	NA
Capsule1_21230318	371798	62645	454	124	124	499736	450136	30.18	37.45	11	571	d__Bacteria;p__Proteobacteria;c__Alphaproteobacteria;o__Pelagibacterales;f__Pelagibacteraceae;g__Pelagibacter;s__Pelagibacter ubique	Bacteria	Proteobacteria	Alphaproteobacteria	Pelagibacterales	Pelagibacteraceae	Pelagibacter	Pelagibacter ubique	63	291	139	8	354	493	70	0.863398	7	22	95	29	0.233871	22993	96136	119129	378641	0.238384	3.62188	cell-like	yes	5	22	20	13	23	Medium-quality	53.45	HMM-based (lower-bound)	NA
Capsule1_13170413	288647	33527	232	75	75	239846	209846	29.15	15.09	11	307	d__Bacteria;p__Proteobacteria;c__Alphaproteobacteria;o__Pelagibacterales;f__Pelagibacteraceae;g__Pelagibacter;s__	Bacteria	Proteobacteria	Alphaproteobacteria	Pelagibacterales	Pelagibacteraceae	Pelagibacter	Unknown_spp	49	155	67	2	204	271	34	0.882736	5	5	65	10	0.133333	22080	12116	34196	205650	0.142575	6.19139	cell-like	yes	2	8	5	15	10	Not-determined	0	NA	no viral genes detected
Capsule1_13141508	111141	27143	303	70	70	233540	205540	30.01	9.43	11	289	0	0	0	0	0	0	0	0	47	131	73	3	178	251	35	0.868512	6	13	51	19	0.271429	19633	58555	78188	155352	0.334795	2.59416	cell-like	yes	2	8	13	9	9	Not-determined	0	NA	no viral genes detected
Capsule1_12172215	150797	40269	312	79	79	351744	320144	30.32	21.33	11	418	d__Bacteria;p__Proteobacteria;c__Alphaproteobacteria;o__Pelagibacterales;f__Pelagibacteraceae;g__Pelagibacter;s__	Bacteria	Proteobacteria	Alphaproteobacteria	Pelagibacterales	Pelagibacteraceae	Pelagibacter	Unknown_spp	62	225	82	3	287	369	46	0.882775	6	13	60	19	0.240506	19360	64052	83412	268332	0.237138	3.72262	cell-like	yes	4	10	9	7	16	Not-determined	0	NA	no viral genes detected
Capsule1_03110023	272117	75505	666	157	157	692784	629984	30.22	27.59	11	718	d__Bacteria;p__Bacteroidota;c__Bacteroidia;o__Flavobacteriales;f__Flavobacteriaceae;g__MAG-121220-bin8;s__MAG-121220-bin8 sp905182765	Bacteria	Bacteroidota	Bacteroidia	Flavobacteriales	Flavobacteriaceae	MAG-121220-bin8	MAG-121220-bin8 sp905182765	90	371	146	7	461	607	104	0.845404	7	36	114	43	0.273885	19345	177624	196969	493785	0.284315	2.97347	cell-like	yes	7	29	26	5	25	Low-quality	9.91	HMM-based (lower-bound)	NA
Capsule1_10191723	295013	88392	673	154	154	762656	701056	37.04	33.23	11	753	d__Bacteria;p__Bacteroidota;c__Bacteroidia;o__Flavobacteriales;f__Flavobacteriaceae;g__Patiriisocius;s__Patiriisocius sp905182755	Bacteria	Bacteroidota	Bacteroidia	Flavobacteriales	Flavobacteriaceae	Patiriisocius	Patiriisocius sp905182755	81	418	156	4	499	655	94	0.869854	3	32	119	35	0.227273	19306	141980	161286	601370	0.211479	4.11319	cell-like	yes	4	26	31	11	22	Not-determined	0	NA	no viral genes detected
Capsule1_23221020	211078	63400	635	152	151	591198	529798	29.84	30.02	11	636	d__Bacteria;p__Bacteroidota;c__Bacteroidia;o__Flavobacteriales;f__Flavobacteriaceae;g__MAG-121220-bin8;s__MAG-121220-bin8 sp905182765	Bacteria	Bacteroidota	Bacteroidia	Flavobacteriales	Flavobacteriaceae	MAG-121220-bin8	MAG-121220-bin8 sp905182765	72	337	122	4	409	531	101	0.834906	8	42	102	50	0.328947	18520	219556	238076	348357	0.402701	2.07326	cell-like	yes	4	25	29	9	19	Not-determined	0	NA	no viral genes detected
Capsule1_08132310	242317	73112	556	134	134	654773	601173	32.76	39.92	11	738	d__Bacteria;p__Proteobacteria;c__Alphaproteobacteria;o__Pelagibacterales;f__AG-422-B15;g__CACCCN01;s__CACCCN01 sp905182145	Bacteria	Proteobacteria	Alphaproteobacteria	Pelagibacterales	AG-422-B15	CACCCN01	CACCCN01 sp905182145	98	351	212	7	449	661	70	0.895664	5	20	109	25	0.186567	17835	76251	94086	560687	0.143693	6.2332	cell-like	yes	11	27	36	13	29	Low-quality	48.76	HMM-based (lower-bound)	NA
Capsule1_17111113	442541	84717	461	122	122	692465	643665	29.96	35.85	11	789	d__Bacteria;p__Proteobacteria;c__Alphaproteobacteria;o__Pelagibacterales;f__Pelagibacteraceae;g__Pelagibacter;s__Pelagibacter ubique	Bacteria	Proteobacteria	Alphaproteobacteria	Pelagibacterales	Pelagibacteraceae	Pelagibacter	Pelagibacter ubique	93	410	192	10	503	695	84	0.880862	8	16	98	24	0.196721	17642	53262	70904	621123	0.102394	8.6027	cell-like	yes	7	26	46	18	25	Medium-quality	57.28	HMM-based (lower-bound)	NA
Capsule1_18101708	98190	31859	554	98	98	320823	281623	31.17	13.79	11	310	0	0	0	0	0	0	0	0	37	175	74	1	212	286	23	0.922581	4	25	69	29	0.295918	16203	105514	121717	199106	0.37939	2.43175	cell-like	yes	4	17	15	2	9	Not-determined	0	NA	no viral genes detected
Capsule1_00200021	400875	62714	538	121	121	454323	405923	30.2	17.6	11	504	d__Bacteria;p__Bacteroidota;c__Bacteroidia;o__Flavobacteriales;f__Flavobacteriaceae;g__MAG-121220-bin8;s__MAG-121220-bin8 sp905182765	Bacteria	Bacteroidota	Bacteroidia	Flavobacteriales	Flavobacteriaceae	MAG-121220-bin8	MAG-121220-bin8 sp905182765	53	283	87	10	336	423	71	0.839286	3	34	84	37	0.305785	16034	126521	142555	311768	0.313775	2.6748	cell-like	yes	5	9	17	3	9	Not-determined	0	NA	no viral genes detected
Capsule1_05072121	561284	120723	1288	309	309	922560	798960	50.4	12.5	11	1046	0	0	0	0	0	0	0	0	136	480	270	8	616	886	152	0.847036	7	24	278	31	0.100324	15906	65415	81321	839822	0.0881471	9.60935	cell-like	yes	20	36	26	28	56	Low-quality	21.63	HMM-based (lower-bound)	NA
Capsule1_11081712	183551	54893	493	129	129	503852	452252	30.82	17.24	11	520	d__Bacteria;p__Bacteroidota;c__Bacteroidia;o__Flavobacteriales;f__Flavobacteriaceae;g__SGZJ01;s__	Bacteria	Bacteroidota	Bacteroidia	Flavobacteriales	Flavobacteriaceae	SGZJ01	Unknown_spp	60	290	103	3	350	453	64	0.871154	5	47	77	52	0.403101	15737	202709	218446	285406	0.433552	2.00934	cell-like	yes	4	28	15	10	18	Not-determined	0	NA	no viral genes detected
Capsule1_21031812	110853	6861	63	15	15	48239	42239	42.39	0	11	66	0	0	0	0	0	0	0	0	7	26	7	1	33	40	25	0.606061	1	5	9	6	0.4	14686	11658	26344	21895	0.546114	1.10977	cell-like	yes	0	1	3	3	5	Low-quality	25.38	HMM-based (lower-bound)	NA
Capsule1_20190107	477838	112231	668	187	185	900020	824020	36.59	32.66	11	955	d__Bacteria;p__Proteobacteria;c__Alphaproteobacteria;o__Rhodobacterales;f__Rhodobacteraceae;g__Amylibacter;s__Amylibacter sp905182285	Bacteria	Proteobacteria	Alphaproteobacteria	Rhodobacterales	Rhodobacteraceae	Amylibacter	Amylibacter sp905182285	114	532	221	4	646	867	84	0.907853	5	15	167	20	0.106952	14378	56909	71287	828733	0.079206	11.4619	cell-like	yes	15	33	45	22	59	Low-quality	6.05	HMM-based (lower-bound)	NA
Capsule1_05161803	491139	121644	822	200	200	1079577	999577	36.68	53.42	11	1147	d__Bacteria;p__Proteobacteria;c__Alphaproteobacteria;o__Rhodobacterales;f__Rhodobacteraceae;g__Amylibacter;s__Amylibacter sp905182285	Bacteria	Proteobacteria	Alphaproteobacteria	Rhodobacterales	Rhodobacteraceae	Amylibacter	Amylibacter sp905182285	126	621	297	7	747	1044	96	0.910201	6	20	174	26	0.13	12947	72495	85442	994135	0.079144	11.5006	cell-like	yes	14	33	50	33	48	Low-quality	46.46	AAI-based (medium-confidence)	no viral genes detected
Capsule1_15170303	447192	68467	410	129	129	496173	444573	31.99	24.53	11	592	d__Bacteria;p__Proteobacteria;c__Alphaproteobacteria;o__Pelagibacterales;f__AG-422-B15;g__CACCCN01;s__	Bacteria	Proteobacteria	Alphaproteobacteria	Pelagibacterales	AG-422-B15	CACCCN01	Unknown_spp	67	266	172	1	333	505	86	0.853041	7	17	105	24	0.186047	12810	55218	68028	428145	0.137105	6.22179	cell-like	yes	3	17	23	12	20	Low-quality	35.34	HMM-based (lower-bound)	NA
Capsule1_22111803	391097	58310	738	168	167	399115	331315	47.21	5.49	11	461	0	0	0	0	0	0	0	0	42	219	128	5	261	389	67	0.843818	5	20	143	25	0.14881	12189	45247	57436	338342	0.143908	5.86358	cell-like	yes	5	19	13	5	22	Not-determined	0	NA	no viral genes detected
Capsule1_22000515	123253	39466	1317	150	150	285687	225687	30.07	18.87	11	367	d__Bacteria;p__Proteobacteria;c__Alphaproteobacteria;o__Pelagibacterales;f__Pelagibacteraceae;g__Pelagibacter;s__	Bacteria	Proteobacteria	Alphaproteobacteria	Pelagibacterales	Pelagibacteraceae	Pelagibacter	Unknown_spp	63	147	92	4	210	302	61	0.822888	7	25	118	32	0.213333	11819	48648	60467	225220	0.211655	3.88788	cell-like	yes	2	7	14	7	18	Not-determined	0	NA	no viral genes detected
Capsule1_21200822	167325	58227	2547	222	221	438839	349439	50.55	19.28	11	548	d__Bacteria;p__Proteobacteria;c__Alphaproteobacteria;o__Rhodobacterales;f__Rhodobacteraceae;g__Planktomarina;s__Planktomarina sp905182455	Bacteria	Proteobacteria	Alphaproteobacteria	Rhodobacterales	Rhodobacteraceae	Planktomarina	Planktomarina sp905182455	62	264	106	4	326	432	112	0.788321	8	17	197	25	0.112613	11574	33649	45223	393616	0.103051	7.64978	cell-like	yes	28	19	14	14	17	Not-determined	0	NA	no viral genes detected
Capsule1_01000008	139966	51722	1764	210	210	454602	370602	37.66	16.69	11	537	d__Bacteria;p__Proteobacteria;c__Alphaproteobacteria;o__Rhodobacterales;f__Rhodobacteraceae;g__Amylibacter;s__Amylibacter sp000153745	Bacteria	Proteobacteria	Alphaproteobacteria	Rhodobacterales	Rhodobacteraceae	Amylibacter	Amylibacter sp000153745	60	269	128	4	329	457	76	0.851024	4	27	179	31	0.147619	11260	51741	63001	390479	0.138585	6.14081	cell-like	yes	9	11	12	16	22	Low-quality	7.33	HMM-based (lower-bound)	NA
Capsule1_23052217	188690	4513	14	6	6	22229	19829	53.13	0	11	34	0	0	0	0	0	0	0	0	5	16	0	1	21	21	12	0.617647	4	0	2	4	0.666667	10668	0	10668	4968	0.479914	1.287	cell-like	yes	0	2	0	0	1	Low-quality	24.12	AAI-based (medium-confidence)	NA
Capsule1_13082315	146052	52161	2404	217	217	401154	314354	52.77	14.66	11	516	0	0	0	0	0	0	0	0	38	272	90	10	310	400	106	0.775194	6	21	190	27	0.124424	10492	36651	47143	351076	0.117518	6.59636	cell-like	yes	10	13	17	5	23	Not-determined	0	NA	no viral genes detected
Capsule1_14101210	222128	27077	108	41	41	177971	161571	37.38	12.64	11	204	0	0	0	0	0	0	0	0	21	90	46	4	111	157	43	0.769608	3	4	34	7	0.170732	10376	5874	16250	161721	0.091307	8.42879	cell-like	yes	2	5	14	2	5	Not-determined	0	NA	no viral genes detected
Capsule1_03151216	124930	37930	513	119	119	344232	296632	50.79	8.33	11	401	0	0	0	0	0	0	0	0	72	199	64	3	271	335	63	0.835411	4	28	87	32	0.268908	10355	71942	82297	261935	0.239074	3.49436	cell-like	yes	3	13	15	11	15	Not-determined	0	NA	no viral genes detected
Capsule1_05222319	180722	56173	559	103	103	506009	464809	39.04	29.31	11	505	d__Bacteria;p__Bacteroidota;c__Bacteroidia;o__Flavobacteriales;f__Flavobacteriaceae;g__MAG-120531;s__MAG-120531 sp000173115	Bacteria	Bacteroidota	Bacteroidia	Flavobacteriales	Flavobacteriaceae	MAG-120531	MAG-120531 sp000173115	50	298	95	4	348	443	58	0.877228	3	12	88	15	0.145631	9993	71405	81398	424611	0.160863	5.45327	cell-like	no	5	20	26	8	13	Not-determined	0	NA	no viral genes detected
Capsule1_02132209	232513	22847	229	69	69	164969	137369	29.5	5.66	11	215	0	0	0	0	0	0	0	0	18	112	55	1	130	185	29	0.860465	4	9	56	13	0.188406	9799	20407	30206	134763	0.183101	4.6994	cell-like	no	2	7	12	5	7	Not-determined	0	NA	no viral genes detected
Capsule1_15230300	205936	19951	160	49	49	136224	116624	33.36	4.17	11	158	0	0	0	0	0	0	0	0	13	66	53	4	79	132	22	0.835443	3	6	40	9	0.183673	9577	13640	23217	113007	0.170433	4.9019	cell-like	no	4	11	14	0	4	Not-determined	0	NA	no viral genes detected
Capsule1_23172103	688773	147810	730	180	180	1179364	1107364	39.88	32.76	11	1179	d__Bacteria;p__Bacteroidota;c__Bacteroidia;o__Flavobacteriales;f__Flavobacteriaceae;g__UBA7428;s__	Bacteria	Bacteroidota	Bacteroidia	Flavobacteriales	Flavobacteriaceae	UBA7428	Unknown_spp	120	682	232	7	802	1034	138	0.877014	3	34	143	37	0.205556	9409	98412	107821	1071543	0.091423	9.59293	cell-like	no	16	41	53	25	34	Medium-quality	50.9	HMM-based (lower-bound)	NA
Capsule1_07022306	184731	52590	270	82	82	438817	406017	47.86	29.31	11	478	d__Bacteria;p__Proteobacteria;c__Alphaproteobacteria;o__Puniceispirillales;f__Puniceispirillaceae;g__UBA4588;s__UBA4588 sp002387605	Bacteria	Proteobacteria	Alphaproteobacteria	Puniceispirillales	Puniceispirillaceae	UBA4588	UBA4588 sp002387605	57	240	115	6	297	412	60	0.861925	4	7	71	11	0.134146	9113	18084	27197	411620	0.061978	13.9069	cell-like	no	6	21	26	7	21	Not-determined	0	NA	no viral genes detected
Capsule1_21232216	163450	36184	314	90	90	315218	279218	38.19	19.39	11	358	d__Bacteria;p__Proteobacteria;c__Gammaproteobacteria;o__Burkholderiales;f__Methylophilaceae;g__BACL14;s__BACL14 sp000168995	Bacteria	Proteobacteria	Gammaproteobacteria	Burkholderiales	Methylophilaceae	BACL14	BACL14 sp000168995	40	200	78	3	240	318	37	0.888268	2	7	81	9	0.1	8950	21242	30192	285026	0.0957813	9.27392	cell-like	no	7	13	32	5	8	Not-determined	0	NA	no viral genes detected
Capsule1_15170909	355798	72630	903	199	198	587735	496210	65.06	9.14	11	677	d__Bacteria;p__Proteobacteria;c__Alphaproteobacteria;o__Sphingomonadales;f__Sphingomonadaceae;g__Sphingomonas;s__	Bacteria	Proteobacteria	Alphaproteobacteria	Sphingomonadales	Sphingomonadaceae	Sphingomonas	Unknown_spp	47	383	131	14	430	561	102	0.828656	5	16	178	21	0.105528	8801	49974	58775	522126	0.100003	8.28635	cell-like	no	46	14	20	20	46	Low-quality	12.17	HMM-based (lower-bound)	NA
Capsule1_16161712	38388	11800	151	41	41	91181	74781	34.85	0	11	120	0	0	0	0	0	0	0	0	11	53	28	0	64	92	28	0.766667	4	7	30	11	0.268293	8660	13938	22598	68583	0.247837	3.09343	cell-like	no	2	4	8	1	0	Not-determined	0	NA	no viral genes detected
Capsule1_07011319	62773	20869	743	81	80	162373	129373	31.12	0	11	190	0	0	0	0	0	0	0	0	24	92	34	2	116	150	38	0.789474	3	20	58	23	0.283951	8587	39911	48498	113875	0.298683	2.64319	cell-like	no	1	6	7	5	3	Not-determined	0	NA	no viral genes detected
Capsule1_17200911	241857	44251	472	132	131	357044	303644	30.25	11.6	11	402	0	0	0	0	0	0	0	0	51	198	83	4	249	332	66	0.825871	4	40	88	44	0.333333	8155	111279	119434	237610	0.334508	2.46891	cell-like	no	1	14	21	7	9	Not-determined	0	NA	no viral genes detected
Capsule1_11130720	223875	69982	705	166	166	693248	626848	30.24	32.92	11	697	d__Bacteria;p__Bacteroidota;c__Bacteroidia;o__Flavobacteriales;f__Flavobacteriaceae;g__MAG-121220-bin8;s__MAG-121220-bin8 sp905182765	Bacteria	Bacteroidota	Bacteroidia	Flavobacteriales	Flavobacteriaceae	MAG-121220-bin8	MAG-121220-bin8 sp905182765	80	383	145	4	463	608	85	0.87231	4	40	122	44	0.26506	7861	220006	227867	465381	0.328695	2.65386	cell-like	no	4	23	38	13	23	High-quality	100	HMM-based (lower-bound)	NA
Capsule1_08191915	182231	28187	198	56	56	201077	178677	30.82	10.1	11	247	0	0	0	0	0	0	0	0	47	110	55	1	157	212	34	0.8583	3	12	41	15	0.267857	7777	43628	51405	148472	0.255648	3.35734	cell-like	no	1	4	7	2	10	Low-quality	28.1	HMM-based (lower-bound)	NA
Capsule1_09051021	288494	91819	1016	192	192	809320	732520	54.19	22.09	11	843	d__Bacteria;p__Verrucomicrobiota;c__Verrucomicrobiae;o__Verrucomicrobiales;f__Akkermansiaceae;g__SW10;s__	Bacteria	Verrucomicrobiota	Verrucomicrobiae	Verrucomicrobiales	Akkermansiaceae	SW10	Unknown_spp	85	412	125	4	497	622	217	0.737841	4	10	178	14	0.0729167	7736	29874	37610	771710	0.0464711	15.8774	cell-like	no	11	23	22	14	26	Not-determined	0	NA	no viral genes detected
Capsule1_17192115	274404	91906	3719	358	356	691464	547064	54.01	13.79	11	835	d__Bacteria;p__Verrucomicrobiota;c__Verrucomicrobiae;o__Verrucomicrobiales;f__Akkermansiaceae;g__SW10;s__	Bacteria	Verrucomicrobiota	Verrucomicrobiae	Verrucomicrobiales	Akkermansiaceae	SW10	Unknown_spp	77	365	111	7	442	553	275	0.662275	4	34	320	38	0.106145	7455	65187	72642	618822	0.105055	6.30406	cell-like	no	16	20	26	7	15	Not-determined	0	NA	no viral genes detected
Capsule1_11191814	206750	72349	1926	257	257	582824	480024	37.12	21.21	11	703	d__Bacteria;p__Proteobacteria;c__Alphaproteobacteria;o__Rhodobacterales;f__Rhodobacteraceae;g__Amylibacter;s__Amylibacter sp000153745	Bacteria	Proteobacteria	Alphaproteobacteria	Rhodobacterales	Rhodobacteraceae	Amylibacter	Amylibacter sp000153745	65	390	159	3	455	614	86	0.8734	2	25	230	27	0.105058	7394	46289	53683	529141	0.0921084	9.4823	cell-like	no	11	19	22	20	37	Not-determined	0	NA	no viral genes detected
Capsule1_04071509	344798	83236	334	101	101	683712	643312	34.77	34.35	11	749	d__Bacteria;p__Proteobacteria;c__Gammaproteobacteria;o__SAR86;f__D2472;g__SCGC-AAA076-P13;s__SCGC-AAA076-P13 sp905182885	Bacteria	Proteobacteria	Gammaproteobacteria	SAR86	D2472	SCGC-AAA076-P13	SCGC-AAA076-P13 sp905182885	72	381	192	13	453	645	91	0.861148	2	15	84	17	0.168317	7078	67444	74522	609190	0.108996	7.90072	cell-like	no	10	32	41	15	25	Low-quality	38.95	AAI-based (medium-confidence)	no viral genes detected
Capsule1_23200921	459152	25689	249	61	61	149359	124959	36.72	4.17	11	180	0	0	0	0	0	0	0	0	14	81	50	3	95	145	32	0.805556	2	14	45	16	0.262295	6887	35740	42627	106732	0.2854	2.82255	cell-like	no	4	5	18	3	5	Low-quality	10.8	AAI-based (medium-confidence)	no viral genes detected
Capsule1_02161718	274876	68438	651	172	172	635156	566356	37.63	21.55	11	699	d__Bacteria;p__Proteobacteria;c__Alphaproteobacteria;o__Rhodobacterales;f__Rhodobacteraceae;g__Amylibacter;s__Amylibacter sp000153745	Bacteria	Proteobacteria	Alphaproteobacteria	Rhodobacterales	Rhodobacteraceae	Amylibacter	Amylibacter sp000153745	89	372	175	3	461	636	60	0.909871	4	24	144	28	0.162791	6802	55825	62627	572529	0.098601	9.22781	cell-like	no	10	27	35	26	29	Not-determined	0	NA	no viral genes detected
Capsule1_13091422	196887	37831	233	83	82	270694	236894	30.23	13.45	11	331	d__Bacteria;p__Proteobacteria;c__Gammaproteobacteria;o__GCA-002705445;f__GCA-002705445;g__GCA-2705445;s__GCA-2705445 sp018674175	Bacteria	Proteobacteria	Gammaproteobacteria	GCA-002705445	GCA-002705445	GCA-2705445	GCA-2705445 sp018674175	37	156	81	2	193	274	55	0.827795	2	12	69	14	0.168675	6801	34786	41587	229107	0.153631	5.3882	cell-like	no	8	9	16	4	10	Low-quality	14.95	HMM-based (lower-bound)	NA
Capsule1_03160310	369625	66170	530	155	155	536068	474068	34.31	15.79	11	579	d__Bacteria;p__Bacteroidota;c__Bacteroidia;o__Flavobacteriales;f__Flavobacteriaceae;g__Polaribacter;s__Polaribacter sp018663625	Bacteria	Bacteroidota	Bacteroidia	Flavobacteriales	Flavobacteriaceae	Polaribacter	Polaribacter sp018663625	63	331	112	4	394	506	69	0.873921	3	26	126	29	0.187097	6669	56784	63453	472615	0.118367	7.38312	cell-like	no	4	16	29	6	14	Not-determined	0	NA	no viral genes detected
Capsule1_19012311	304653	31661	147	54	54	217234	195634	35.01	10.87	11	244	d__Bacteria;p__Proteobacteria;c__Gammaproteobacteria;o__SAR86;f__D2472;g__SCGC-AAA076-P13;s__SCGC-AAA076-P13 sp018607365	Bacteria	Proteobacteria	Gammaproteobacteria	SAR86	D2472	SCGC-AAA076-P13	SCGC-AAA076-P13 sp018607365	15	127	72	1	142	214	29	0.877049	2	10	42	12	0.222222	6631	52461	59092	158142	0.27202	3.22421	cell-like	no	1	12	17	5	6	Not-determined	0	NA	no viral genes detected
Capsule1_23202306	131372	44017	2596	175	175	287818	217818	54.15	4.08	11	394	0	0	0	0	0	0	0	0	29	186	73	4	215	288	102	0.730964	5	24	146	29	0.165714	6444	36067	42511	245307	0.147701	4.94895	cell-like	no	20	9	13	14	8	Not-determined	0	NA	no viral genes detected
Capsule1_13051121	157733	21946	413	75	75	163733	133733	63.76	0	11	196	0	0	0	0	0	0	0	0	17	93	34	0	110	144	52	0.734694	2	3	70	5	0.0666667	6399	7810	14209	149524	0.0867815	8.46602	cell-like	no	14	2	4	3	6	Not-determined	0	NA	no viral genes detected
Capsule1_00231907	427420	109547	524	133	132	877568	823768	48.12	52.49	11	929	d__Bacteria;p__Actinobacteriota;c__Actinomycetia;o__Nanopelagicales;f__UBA5976;g__UBA5976;s__	Bacteria	Actinobacteriota	Actinomycetia	Nanopelagicales	UBA5976	UBA5976	Unknown_spp	124	596	123	7	720	843	79	0.907427	2	12	119	14	0.105263	6273	23473	29746	847822	0.0338959	26.771	cell-like	no	11	28	49	25	46	Not-determined	0	NA	no viral genes detected
Capsule1_04230718	679855	134458	611	164	164	1094708	1029108	39.03	39.55	11	1075	d__Bacteria;p__Bacteroidota;c__Bacteroidia;o__Flavobacteriales;f__Flavobacteriaceae;g__MAG-120531;s__MAG-120531 sp000173115	Bacteria	Bacteroidota	Bacteroidia	Flavobacteriales	Flavobacteriaceae	MAG-120531	MAG-120531 sp000173115	116	646	197	13	762	959	103	0.892093	3	23	138	26	0.158537	6075	154784	160859	927415	0.146942	6.07104	cell-like	no	13	42	60	16	26	Low-quality	42.52	HMM-based (lower-bound)	NA
Capsule1_05160213	327922	29977	161	56	56	208387	185987	29.76	11.49	11	241	d__Bacteria;p__Proteobacteria;c__Alphaproteobacteria;o__Pelagibacterales;f__Pelagibacteraceae;g__Pelagibacter;s__Pelagibacter ubique	Bacteria	Proteobacteria	Alphaproteobacteria	Pelagibacterales	Pelagibacteraceae	Pelagibacter	Pelagibacter ubique	40	135	47	2	175	222	17	0.921162	4	7	45	11	0.196429	6028	28882	34910	173477	0.167525	5.49866	cell-like	no	2	12	9	4	7	Not-determined	0	NA	no viral genes detected
Capsule1_02220114	140553	25915	211	62	62	200926	176126	43.89	0	11	236	0	0	0	0	0	0	0	0	23	145	40	2	168	208	26	0.881356	4	8	50	12	0.193548	5974	23506	29480	171446	0.146721	6.00703	cell-like	no	2	6	11	6	14	Not-determined	0	NA	no viral genes detected
Capsule1_00040015	221389	70374	395	77	77	622385	591585	34.44	32.29	11	701	d__Bacteria;p__Actinobacteriota;c__Acidimicrobiia;o__Actinomarinales;f__Actinomarinaceae;g__Actinomarina;s__Actinomarina sp014239265	Bacteria	Actinobacteriota	Acidimicrobiia	Actinomarinales	Actinomarinaceae	Actinomarina	Actinomarina sp014239265	137	338	95	5	475	570	126	0.813124	4	29	44	33	0.428571	5865	330092	335957	286428	0.53979	1.50637	cell-like	no	6	26	34	17	22	High-quality	100	HMM-based (lower-bound)	NA
Capsule1_10170312	143663	43930	465	108	108	388094	344894	52.5	9.25	11	418	0	0	0	0	0	0	0	0	59	172	53	2	231	284	132	0.679426	3	8	97	11	0.101852	5797	15481	21278	366816	0.0548269	12.3922	cell-like	no	2	7	18	12	12	Not-determined	0	NA	no viral genes detected
Capsule1_16200800	106035	37929	1179	151	151	332942	272542	33.08	4.17	11	403	0	0	0	0	0	0	0	0	51	178	104	0	229	333	70	0.826303	3	20	128	23	0.152318	5587	32528	38115	291786	0.114479	7.21792	cell-like	no	4	8	19	6	23	Low-quality	23.14	HMM-based (lower-bound)	NA
Capsule1_20232309	229596	14403	64	26	26	105050	94650	29.36	8.23	11	116	0	0	0	0	0	0	0	0	11	66	28	0	77	105	11	0.905172	1	8	17	9	0.346154	5571	30980	36551	68499	0.347939	2.60153	cell-like	no	1	3	10	3	7	Not-determined	0	NA	no viral genes detected
Capsule1_01231919	182120	25905	177	60	60	199109	175109	30.05	0.86	11	251	0	0	0	0	0	0	0	0	43	114	62	3	157	219	29	0.87251	3	6	51	9	0.15	5459	14273	19732	179377	0.0991015	8.80421	cell-like	no	2	5	8	8	18	Not-determined	0	NA	no viral genes detected
Capsule1_16140823	25935	8250	187	31	31	60772	48372	29.73	0	11	90	0	0	0	0	0	0	0	0	5	41	31	0	46	77	13	0.855556	3	6	22	9	0.290323	5085	8504	13589	47183	0.223606	3.82617	cell-like	no	2	2	3	5	4	Low-quality	2.53	AAI-based (medium-confidence)	no viral genes detected
Capsule1_18151815	192466	60166	614	131	131	584104	531704	37.74	30.52	11	655	d__Bacteria;p__Proteobacteria;c__Gammaproteobacteria;o__PS1;f__Thioglobaceae;g__Pseudothioglobus;s__	Bacteria	Proteobacteria	Gammaproteobacteria	PS1	Thioglobaceae	Pseudothioglobus	Unknown_spp	59	342	184	4	401	585	66	0.89313	2	22	107	24	0.183206	4936	82600	87536	496568	0.149864	5.95961	cell-like	no	10	26	23	16	29	Not-determined	0	NA	no viral genes detected
Capsule1_04060912	238996	55608	391	95	95	430681	392681	30.29	25.73	11	507	d__Bacteria;p__Proteobacteria;c__Alphaproteobacteria;o__Pelagibacterales;f__Pelagibacteraceae;g__Pelagibacter;s__	Bacteria	Proteobacteria	Alphaproteobacteria	Pelagibacterales	Pelagibacteraceae	Pelagibacter	Unknown_spp	75	228	132	5	303	435	67	0.857988	3	12	80	15	0.157895	4855	66807	71662	359019	0.166392	5.15642	cell-like	no	6	16	22	6	26	Not-determined	0	NA	no viral genes detected
Capsule1_09182112	227347	70181	868	188	187	709085	633285	38	12.93	11	782	d__Bacteria;p__Proteobacteria;c__Alphaproteobacteria;o__Rhodobacterales;f__Rhodobacteraceae;g__Amylibacter;s__Amylibacter sp000153745	Bacteria	Proteobacteria	Alphaproteobacteria	Rhodobacterales	Rhodobacteraceae	Amylibacter	Amylibacter sp000153745	95	398	200	2	493	693	87	0.886189	3	19	166	22	0.117021	4656	38700	43356	663392	0.0611436	14.4936	cell-like	no	12	20	17	26	36	Not-determined	0	NA	no viral genes detected
Capsule1_16222323	154648	56017	2691	240	239	455834	359234	51.42	4.17	11	585	0	0	0	0	0	0	0	0	50	290	112	3	340	452	130	0.77265	3	23	214	26	0.108333	4597	41621	46218	408379	0.101392	7.62041	cell-like	no	12	8	19	17	25	Not-determined	0	NA	no viral genes detected
Capsule1_05230219	198786	18250	326	61	61	172889	148489	31.04	7.55	11	198	0	0	0	0	0	0	0	0	19	91	57	2	110	167	29	0.843434	2	13	46	15	0.245902	4433	40582	45015	127874	0.260369	3.23938	cell-like	no	0	3	9	7	5	Not-determined	0	NA	no viral genes detected
Capsule1_13020319	180566	24855	167	46	46	191856	173456	29.94	20.75	11	228	d__Bacteria;p__Proteobacteria;c__Alphaproteobacteria;o__Pelagibacterales;f__Pelagibacteraceae;g__Pelagibacter;s__	Bacteria	Proteobacteria	Alphaproteobacteria	Pelagibacterales	Pelagibacteraceae	Pelagibacter	Unknown_spp	19	121	64	1	140	204	23	0.894737	2	6	38	8	0.173913	4209	18270	22479	169377	0.117166	7.63649	cell-like	no	1	7	12	2	8	Low-quality	3.16	AAI-based (medium-confidence)	no viral genes detected
Capsule1_05091518	307848	48464	516	151	151	344426	284026	50.15	0	11	445	0	0	0	0	0	0	0	0	46	237	91	2	283	374	69	0.840449	2	11	138	13	0.0860927	3962	20770	24732	319694	0.0718064	11.7044	cell-like	no	6	10	18	16	14	Low-quality	13.16	AAI-based (medium-confidence)	no viral genes detected
Capsule1_14181601	119323	19208	164	48	48	138241	119041	29.89	5.66	11	177	0	0	0	0	0	0	0	0	23	83	44	0	106	150	27	0.847458	1	8	39	9	0.1875	3739	20216	23955	114286	0.173284	4.89056	cell-like	no	2	4	5	2	10	Not-determined	0	NA	no viral genes detected
Capsule1_00101609	160798	7549	94	20	20	35836	27836	29.61	2.83	11	46	0	0	0	0	0	0	0	0	0	31	4	1	31	35	10	0.76087	2	5	13	7	0.35	3701	6125	9826	26010	0.274194	2.77494	cell-like	no	0	2	3	1	0	Not-determined	0	NA	no viral genes detected
Capsule1_20111112	79603	27870	1298	117	117	221069	174269	54.01	4.17	11	299	0	0	0	0	0	0	0	0	40	145	59	0	185	244	55	0.816054	2	8	107	10	0.0854701	3687	16321	20008	201061	0.0905057	9.0166	cell-like	no	1	7	9	10	22	Not-determined	0	NA	no viral genes detected
Capsule1_18190908	122883	10071	139	35	35	67871	53871	29.47	0	11	91	0	0	0	0	0	0	0	0	7	39	30	0	46	76	15	0.835165	2	5	28	7	0.2	3497	8574	12071	55800	0.177852	4.69584	cell-like	no	1	0	5	5	3	Not-determined	0	NA	no viral genes detected
Capsule1_00071116	16692	3918	34	8	8	30295	27095	33.94	8.62	11	34	0	0	0	0	0	0	0	0	4	16	9	1	20	29	4	0.852941	1	1	6	2	0.25	2829	2179	5008	25287	0.165308	5.15972	cell-like	no	0	3	3	1	0	Low-quality	2.33	HMM-based (lower-bound)	NA
Capsule1_07200118	264180	81536	681	138	138	706119	650919	46.42	35.34	11	798	d__Bacteria;p__Actinobacteriota;c__Actinomycetia;o__Nanopelagicales;f__Nanopelagicaceae;g__Planktophila;s__Planktophila sp009698295	Bacteria	Actinobacteriota	Actinomycetia	Nanopelagicales	Nanopelagicaceae	Planktophila	Planktophila sp009698295	89	514	90	3	603	693	102	0.868421	2	16	120	18	0.130435	2787	34449	37236	668883	0.0527333	16.4682	cell-like	no	14	26	46	22	36	Low-quality	3.26	AAI-based (medium-confidence)	no viral genes detected
Capsule1_00171606	175340	16051	111	28	28	102940	91740	34.06	0	11	125	0	0	0	0	0	0	0	0	20	61	34	0	81	115	10	0.92	2	5	21	7	0.25	2743	24245	26988	75952	0.262172	3.50914	cell-like	no	4	0	10	1	4	Not-determined	0	NA	no viral genes detected
Capsule1_17200022	261767	25348	111	31	31	150719	138319	37.71	13.79	11	161	d__Bacteria;p__Proteobacteria;c__Gammaproteobacteria;o__SAR86;f__D2472;g__D2472;s__D2472 sp905181595	Bacteria	Proteobacteria	Gammaproteobacteria	SAR86	D2472	D2472	D2472 sp905181595	29	73	39	1	102	141	19	0.875776	1	3	27	4	0.129032	2413	3340	5753	144966	0.0381704	22.9439	cell-like	no	4	9	10	4	6	Not-determined	0	NA	no viral genes detected
Capsule1_16061222	162044	44169	437	107	106	402137	358737	29.7	22.78	11	450	d__Bacteria;p__Proteobacteria;c__Alphaproteobacteria;o__Pelagibacterales;f__Pelagibacteraceae;g__Pelagibacter;s__	Bacteria	Proteobacteria	Alphaproteobacteria	Pelagibacterales	Pelagibacteraceae	Pelagibacter	Unknown_spp	59	233	113	4	292	405	41	0.9	2	15	90	17	0.158879	2365	85855	88220	311416	0.219378	4.10251	cell-like	no	4	15	16	15	19	Low-quality	41.01	HMM-based (lower-bound)	NA
Capsule1_09232106	5106	1499	85	5	5	6494	4494	31.31	0	11	8	0	0	0	0	0	0	0	0	0	4	1	0	4	5	3	0.625	2	0	3	2	0.4	2304	0	2304	4190	0.354789	1.76161	cell-like	no	0	0	0	0	0	Not-determined	0	NA	no viral genes detected
Capsule1_21230921	179351	11989	89	29	29	70806	59206	29.42	6.59	11	99	0	0	0	0	0	0	0	0	7	60	21	0	67	88	11	0.888889	1	4	24	5	0.172414	2234	9192	11426	59380	0.161371	5.50837	cell-like	no	1	3	3	2	4	Not-determined	0	NA	no viral genes detected
Capsule1_21081503	240967	10827	70	23	23	64563	55363	34.22	6.03	11	69	0	0	0	0	0	0	0	0	5	38	20	0	43	63	6	0.913043	1	5	17	6	0.26087	2225	20246	22471	42092	0.348048	2.62333	cell-like	no	0	2	3	1	2	Low-quality	9.36	AAI-based (medium-confidence)	no viral genes detected
Capsule1_01071116	25168	4760	40	12	12	34669	29869	34.28	8.62	11	37	0	0	0	0	0	0	0	0	4	16	9	1	20	29	7	0.783784	1	3	8	4	0.333333	2190	6232	8422	26247	0.242926	3.22643	cell-like	no	0	4	1	1	0	Low-quality	3.94	HMM-based (lower-bound)	NA
Capsule1_19041407	17210	1243	13	3	3	4606	3406	47.8	0	11	4	0	0	0	0	0	0	0	0	0	3	0	1	3	3	0	0.75	1	0	2	1	0.333333	2138	0	2138	2468	0.464177	1.61576	cell-like	no	0	4	0	0	0	Low-quality	1.9	HMM-based (lower-bound)	high kmer_freq may indicate large duplication; low-confidence ITR
Capsule1_11141522	138026	17339	197	54	54	116213	94613	38.35	4.17	11	154	0	0	0	0	0	0	0	0	9	88	34	1	97	131	22	0.850649	1	8	45	9	0.166667	2113	19696	21809	94404	0.187664	4.53283	cell-like	no	2	4	13	2	2	Not-determined	0	NA	no viral genes detected
Capsule1_01012023	3378	1400	56	4	4	6096	4496	31.27	0	11	7	0	0	0	0	0	0	0	0	1	3	2	0	4	6	1	0.857143	1	0	3	1	0.25	2051	0	2051	4045	0.33645	2.54761	cell-like	no	0	0	0	0	0	Not-determined	0	NA	no viral genes detected
Capsule1_14130718	425817	42474	120	53	53	306197	284997	29.54	37.74	11	351	d__Bacteria;p__Proteobacteria;c__Alphaproteobacteria;o__Pelagibacterales;f__Pelagibacteraceae;g__Pelagibacter_A;s__	Bacteria	Proteobacteria	Alphaproteobacteria	Pelagibacterales	Pelagibacteraceae	Pelagibacter_A	Unknown_spp	36	189	90	2	225	315	34	0.897436	1	4	48	5	0.0943396	2000	38908	40908	265289	0.1336	6.71732	cell-like	no	4	11	18	7	8	Not-determined	0	NA	no viral genes detected
Capsule1_05162315	170259	10540	97	27	27	64189	53389	38.14	0	11	68	0	0	0	0	0	0	0	0	8	29	15	1	37	52	15	0.764706	1	4	22	5	0.185185	1974	6582	8556	55633	0.133294	5.73699	cell-like	no	0	5	2	0	2	Not-determined	0	NA	no viral genes detected
Capsule1_01232106	5922	1753	86	7	7	14039	11239	32.01	0	11	19	0	0	0	0	0	0	0	0	1	9	2	2	10	12	5	0.631579	1	2	4	3	0.428571	1960	4959	6919	7120	0.492841	1.28151	cell-like	no	0	2	2	0	0	Low-quality	3.53	HMM-based (lower-bound)	NA
Capsule1_21102106	196547	29143	420	108	108	225246	182046	56.2	8.33	11	271	0	0	0	0	0	0	0	0	21	121	66	7	142	208	56	0.767528	1	3	104	4	0.037037	1908	6902	8810	216436	0.0391128	19.6234	cell-like	no	9	5	6	8	19	Not-determined	0	NA	no viral genes detected
Capsule1_11200222	200846	27770	204	49	49	216741	197141	29.83	17.19	11	271	d__Bacteria;p__Proteobacteria;c__Alphaproteobacteria;o__Pelagibacterales;f__Pelagibacteraceae;g__Pelagibacter;s__	Bacteria	Proteobacteria	Alphaproteobacteria	Pelagibacterales	Pelagibacteraceae	Pelagibacter	Unknown_spp	32	131	70	5	163	233	33	0.859779	1	7	41	8	0.163265	1734	18584	20318	196423	0.0937432	9.17163	cell-like	no	0	8	10	2	7	Low-quality	5.4	HMM-based (lower-bound)	NA
Capsule1_04230207	378897	13422	80	26	25	87938	76938	34.53	1.88	11	98	0	0	0	0	0	0	0	0	7	46	28	1	53	81	16	0.826531	1	6	19	7	0.269231	1690	17629	19319	68619	0.219689	3.76228	cell-like	no	1	5	5	5	5	Low-quality	20.64	AAI-based (medium-confidence)	no viral genes detected
Capsule1_02070509	81336	13291	266	37	37	73362	58562	65.94	0	11	92	0	0	0	0	0	0	0	0	9	42	20	0	51	71	21	0.771739	1	7	29	8	0.216216	1688	14614	16302	57060	0.222213	3.47297	cell-like	no	8	2	2	0	0	Not-determined	0	NA	no viral genes detected
Capsule1_00040922	228260	67421	719	142	142	600271	543471	45.9	18.22	11	638	d__Bacteria;p__Proteobacteria;c__Gammaproteobacteria;o__Pseudomonadales;f__Pseudohongiellaceae;g__RFVC01;s__RFVC01 sp018698975	Bacteria	Proteobacteria	Gammaproteobacteria	Pseudomonadales	Pseudohongiellaceae	RFVC01	RFVC01 sp018698975	57	374	126	4	431	557	77	0.873041	1	12	129	13	0.0915493	1645	25361	27006	573265	0.0449897	19.4054	cell-like	no	15	14	31	11	24	Not-determined	0	NA	no viral genes detected
Capsule1_20220714	214589	68442	998	171	171	655658	587258	53.7	23.43	11	707	d__Bacteria;p__Verrucomicrobiota;c__Verrucomicrobiae;o__Verrucomicrobiales;f__Akkermansiaceae;g__SW10;s__	Bacteria	Verrucomicrobiota	Verrucomicrobiae	Verrucomicrobiales	Akkermansiaceae	SW10	Unknown_spp	61	346	108	4	407	515	188	0.72843	1	13	157	14	0.0818713	1439	47973	49412	604692	0.0753625	9.66569	cell-like	no	12	18	18	12	22	Not-determined	0	NA	no viral genes detected
Capsule1_08041920	307796	78232	449	127	127	607702	556902	45.26	22.57	11	596	d__Bacteria;p__Bacteroidota;c__Bacteroidia;o__Flavobacteriales;f__Schleiferiaceae;g__UBA10364;s__UBA10364 sp003045825	Bacteria	Bacteroidota	Bacteroidia	Flavobacteriales	Schleiferiaceae	UBA10364	UBA10364 sp003045825	58	349	104	3	407	511	82	0.857383	1	21	105	22	0.173228	1374	58252	59626	548076	0.0981172	8.73835	cell-like	no	4	16	38	3	18	Not-determined	0	NA	no viral genes detected
Capsule1_12052122	32275	4614	76	11	11	18937	14537	64.37	0	1	28	0	0	0	0	0	0	0	0	0	13	4	0	13	17	11	0.607143	1	1	9	2	0.181818	1365	1211	2576	16361	0.13603	4.4633	cell-like	no	0	0	1	1	2	Low-quality	1.92	HMM-based (lower-bound)	NA
Capsule1_05160003	224051	23215	250	56	56	151946	129546	46.49	0	11	162	0	0	0	0	0	0	0	0	18	93	32	0	111	143	19	0.882716	1	3	52	4	0.0714286	1355	10361	11716	140230	0.0771063	11.448	cell-like	no	1	3	11	2	3	Not-determined	0	NA	no viral genes detected
Capsule1_16210116	30605	11857	305	37	37	86052	71252	37.43	2.59	11	118	0	0	0	0	0	0	0	0	12	57	31	1	69	100	17	0.847458	1	2	34	3	0.0810811	1314	2947	4261	81791	0.0495166	17.1146	cell-like	no	1	1	7	1	5	Not-determined	0	NA	no viral genes detected
Capsule1_19201114	64152	3661	67	4	4	6579	4979	38.74	0	11	12	0	0	0	0	0	0	0	0	0	7	4	0	7	11	1	0.916667	1	0	3	1	0.25	1312	0	1312	5267	0.199422	4.59661	cell-like	no	0	0	0	0	2	Not-determined	0	NA	no viral genes detected; high kmer_freq may indicate large duplication; low-confidence ITR
Capsule1_09160419	182253	28114	308	71	71	186314	157914	51.38	0	11	232	0	0	0	0	0	0	0	0	21	122	46	0	143	189	43	0.814655	1	12	58	13	0.183099	1277	25838	27115	159199	0.145534	5.5977	cell-like	no	4	8	5	6	7	Not-determined	0	NA	no viral genes detected
Capsule1_12131512	42079	14086	574	57	56	104217	80047	64.86	2.63	11	125	0	0	0	0	0	0	0	0	8	64	20	3	72	92	30	0.736	1	3	53	4	0.0701754	1186	7002	8188	96029	0.0785668	9.36782	cell-like	no	8	5	5	1	6	Low-quality	6.11	HMM-based (lower-bound)	NA
Capsule1_03082306	175647	20094	301	59	58	110820	86519	64.9	3.45	11	149	0	0	0	0	0	0	0	0	10	60	24	1	70	94	54	0.630872	1	6	52	7	0.118644	1170	11018	12188	98632	0.10998	5.73624	cell-like	no	1	2	4	2	5	Low-quality	6.07	HMM-based (lower-bound)	NA
Capsule1_13232215	365490	73863	416	114	114	571936	526336	43.77	18.67	11	594	d__Bacteria;p__Proteobacteria;c__Alphaproteobacteria;o__Rhodobacterales;f__Rhodobacteraceae;g__Planktomarina;s__Planktomarina sp017856985	Bacteria	Proteobacteria	Alphaproteobacteria	Rhodobacterales	Rhodobacteraceae	Planktomarina	Planktomarina sp017856985	73	310	144	3	383	527	64	0.887205	1	12	101	13	0.114035	1134	33313	34447	537489	0.0602288	14.7306	cell-like	no	16	27	19	17	16	Not-determined	0	NA	no viral genes detected
Capsule1_06211506	21908	1181	8	1	1	3120	2720	56.32	0	11	5	0	0	0	0	0	0	0	0	0	1	1	1	1	2	2	0.4	1	0	0	1	1	900	0	900	0	0.288462	1.38667	cell-like	no	0	1	0	0	0	Low-quality	0.26	HMM-based (lower-bound)	NA
Capsule1_00011209	45881	814	10	1	1	1830	1430	63.64	0	1	1	0	0	0	0	0	0	0	0	0	1	0	0	1	1	0	1	0	0	1	0	0	0	0	0	1830	0	100	cell-like	no	0	0	1	0	0	0	0	0	0
Capsule1_00020621	231130	907	9	1	1	2234	1834	30.32	0	11	2	0	0	0	0	0	0	0	0	0	1	0	0	1	1	1	0.5	0	0	1	0	0	0	0	0	2234	0	50	cell-like	no	0	0	0	0	0	0	0	0	0
Capsule1_01001516	35971	2736	52	7	7	9589	6789	66.76	0	11	13	0	0	0	0	0	0	0	0	0	7	0	0	7	7	6	0.538462	0	0	7	0	0	0	0	0	9589	0	53.8462	cell-like	no	0	0	1	0	0	0	0	0	0
Capsule1_01111800	6836	2804	77	9	9	21023	17423	30.51	1.89	11	25	0	0	0	0	0	0	0	0	3	10	6	0	13	19	6	0.76	0	0	9	0	0	0	0	0	21023	0	76	cell-like	no	0	0	3	0	0	0	0	0	0
Capsule1_01141915	77707	1052	3	1	1	3525	3125	51.01	0	11	5	0	0	0	0	0	0	0	0	0	5	0	0	5	5	0	1	0	0	1	0	0	0	0	0	3525	0	100	cell-like	no	0	0	1	0	0	0	0	0	0
Capsule1_01231403	7641	965	18	1	1	1202	802	34.66	0	11	3	0	0	0	0	0	0	0	0	0	2	0	0	2	2	1	0.666667	0	0	1	0	0	0	0	0	1202	0	66.6667	cell-like	no	0	0	0	0	0	0	0	0	0
Capsule1_02050622	27340	2255	19	5	5	13441	11441	56.25	0	11	14	0	0	0	0	0	0	0	0	0	0	11	0	0	11	3	0.785714	0	1	4	1	0.2	0	1643	1643	11798	0.122238	6.42775	cell-like	no	0	0	0	0	0	Not-determined	0	NA	no viral genes detected
Capsule1_02071116	14465	3681	37	7	7	23900	21100	33.73	6.9	11	25	0	0	0	0	0	0	0	0	2	10	9	1	12	21	3	0.84	0	2	5	2	0.285714	0	5340	5340	18560	0.223431	3.75955	cell-like	no	0	3	1	1	0	Not-determined	0	NA	no viral genes detected
Capsule1_02101223	8283	601	5	2	2	3667	2867	31.5	0	11	6	0	0	0	0	0	0	0	0	0	0	6	0	0	6	0	1	0	0	2	0	0	0	0	0	3667	0	100	cell-like	no	0	0	0	2	0	0	0	0	0
Capsule1_02172112	2489	648	13	1	1	1058	658	48.02	0	11	2	0	0	0	0	0	0	0	0	0	0	1	0	0	1	1	0.5	0	0	1	0	0	0	0	0	1058	0	50	cell-like	no	0	0	1	0	0	0	0	0	0
Capsule1_02201818	15166	783	3	1	1	2208	1808	64.99	0	11	1	0	0	0	0	0	0	0	0	0	0	1	0	0	1	0	1	0	0	1	0	0	0	0	0	2208	0	100	cell-like	no	1	0	0	0	0	0	0	0	0
Capsule1_02210510	115015	12925	118	34	34	67876	54276	33.32	0	11	102	0	0	0	0	0	0	0	0	7	54	13	0	61	74	28	0.72549	0	7	27	7	0.205882	0	9643	9643	58233	0.142068	5.10664	cell-like	no	0	3	3	1	2	Not-determined	0	NA	no viral genes detected
Capsule1_03000912	68344	995	7	2	2	3435	2635	38.06	0	11	5	0	0	0	0	0	0	0	0	3	0	0	0	3	3	2	0.6	0	0	2	0	0	0	0	0	3435	0	60	cell-like	no	0	0	0	0	0	0	0	0	0
Capsule1_03002011	10808	4075	192	16	16	26645	20245	33.75	4.17	11	42	0	0	0	0	0	0	0	0	7	12	9	0	19	28	14	0.666667	0	2	14	2	0.125	0	3363	3363	23282	0.126215	5.28199	cell-like	no	2	0	1	1	1	Not-determined	0	NA	no viral genes detected
Capsule1_03012011	15822	5923	109	14	13	53331	47131	34.45	4.17	11	65	0	0	0	0	0	0	0	0	13	25	19	2	38	57	6	0.876923	0	4	10	4	0.285714	0	6501	6501	46830	0.121899	7.19384	cell-like	no	4	1	3	1	4	Not-determined	0	NA	no viral genes detected
Capsule1_03012117	9880	1330	17	1	1	1565	1165	62.49	0	11	2	0	0	0	0	0	0	0	0	1	0	0	0	1	1	1	0.5	0	0	1	0	0	0	0	0	1565	0	50	cell-like	no	0	0	0	0	1	0	0	0	0
Capsule1_03022011	12173	4409	182	18	18	26466	19266	33.81	0	11	36	0	0	0	0	0	0	0	0	4	13	15	1	17	32	3	0.888889	0	3	15	3	0.166667	0	3644	3644	22822	0.137686	6.45591	cell-like	no	2	0	1	1	2	Not-determined	0	NA	no viral genes detected
Capsule1_03081221	100523	2135	27	6	6	8232	5832	57.75	0	11	10	0	0	0	0	0	0	0	0	0	1	5	0	1	6	4	0.6	0	0	6	0	0	0	0	0	8232	0	60	cell-like	no	0	0	0	0	0	0	0	0	0
Capsule1_03131218	94850	2175	13	2	2	7299	6499	52.96	0	1	10	0	0	0	0	0	0	0	0	0	0	1	0	0	1	9	0.1	0	0	2	0	0	0	0	0	7299	0	10	cell-like	no	0	0	0	0	0	0	0	0	0
Capsule1_03200706	10703	945	3	2	2	4060	3260	28.9	0	11	2	0	0	0	0	0	0	0	0	0	1	0	0	1	1	1	0.5	0	1	1	1	0.5	0	1137	1137	2923	0.280049	1.7854	cell-like	no	0	1	0	1	0	Low-quality	3.31	AAI-based (medium-confidence)	NA
Capsule1_03230023	5555	1336	22	4	4	5399	3799	31.64	0.51	11	11	0	0	0	0	0	0	0	0	0	8	3	0	8	11	0	1	0	0	4	0	0	0	0	0	5399	0	100	cell-like	no	0	0	0	2	0	0	0	0	0
Capsule1_03231104	45168	1314	14	1	1	2564	2164	50.09	0	11	2	0	0	0	0	0	0	0	0	0	1	1	0	1	2	0	1	0	0	1	0	0	0	0	0	2564	0	100	cell-like	no	0	0	0	0	0	0	0	0	0
Capsule1_04031610	28107	1330	23	3	3	4171	2971	50.39	0	1	5	0	0	0	0	0	0	0	0	0	0	1	0	0	1	4	0.2	0	0	3	0	0	0	0	0	4171	0	20	cell-like	no	0	1	0	0	0	0	0	0	0
Capsule1_05142217	28616	615	10	1	1	1075	675	39.7	0	11	2	0	0	0	0	0	0	0	0	0	1	0	0	1	1	1	0.5	0	0	1	0	0	0	0	0	1075	0	50	cell-like	no	0	1	0	0	0	0	0	0	0
Capsule1_05160416	40269	1148	22	1	1	1375	975	36	0	11	2	0	0	0	0	0	0	0	0	0	0	1	1	0	1	0	0.5	0	0	1	0	0	0	0	0	1375	0	50	cell-like	no	0	0	2	0	0	0	0	0	0
Capsule1_05220614	38064	1683	14	2	2	4490	3690	37.97	0	11	4	0	0	0	0	0	0	0	0	1	3	0	0	4	4	0	1	0	1	1	1	0.5	0	2298	2298	2192	0.511804	1.95387	cell-like	no	0	0	0	0	1	Not-determined	0	NA	no viral genes detected
Capsule1_06102119	99374	5705	63	12	12	32702	27902	32.46	0.97	11	47	0	0	0	0	0	0	0	0	37	1	1	0	38	39	8	0.829787	0	4	8	4	0.333333	0	11467	11467	21235	0.350651	2.36642	cell-like	no	0	0	1	0	1	Not-determined	0	NA	no viral genes detected
Capsule1_06111800	2028	961	49	3	3	3501	2301	28.77	0	11	5	0	0	0	0	0	0	0	0	1	1	1	0	2	3	2	0.6	0	0	3	0	0	0	0	0	3501	0	60	cell-like	no	0	0	0	0	0	0	0	0	0
Capsule1_06220500	149016	2202	4	3	3	10074	8874	44.26	0	11	11	0	0	0	0	0	0	0	0	0	4	5	0	4	9	2	0.818182	0	1	2	1	0.333333	0	1761	1761	8313	0.174806	4.6805	cell-like	no	0	0	0	0	0	Not-determined	0	NA	no viral genes detected
Capsule1_07071116	1630	853	27	3	3	6340	5140	33.64	0	11	8	0	0	0	0	0	0	0	0	0	2	5	0	2	7	1	0.875	0	0	3	0	0	0	0	0	6340	0	87.5	cell-like	no	0	4	0	0	0	0	0	0	0
Capsule1_07081610	31640	3581	40	10	9	23446	18846	30.21	4.17	11	30	0	0	0	0	0	0	0	0	5	13	2	1	18	20	9	0.666667	0	3	7	3	0.3	0	3673	3673	19773	0.156658	4.25556	cell-like	no	0	0	2	0	0	Not-determined	0	NA	no viral genes detected
Capsule1_07082115	1822	719	5	1	1	2894	2494	35.97	0	11	2	0	0	0	0	0	0	0	0	0	2	0	0	2	2	0	1	0	0	1	0	0	0	0	0	2894	0	100	cell-like	no	0	0	2	0	0	0	0	0	0
Capsule1_08132223	46293	3070	66	3	3	3348	2148	62.94	0	11	3	0	0	0	0	0	0	0	0	1	0	0	0	1	1	2	0.333333	0	1	2	1	0.333333	0	1030	1030	2318	0.307646	1.0835	cell-like	no	0	0	0	0	0	Not-determined	0	NA	no viral genes detected
Capsule1_09050821	100370	1382	15	2	2	4309	3509	39.1	0	1	4	0	0	0	0	0	0	0	0	0	0	2	0	0	2	2	0.5	0	1	1	1	0.5	0	1659	1659	1768	0.385008	1.29867	cell-like	no	0	0	0	0	0	Not-determined	0	NA	no viral genes detected
Capsule1_09060909	333330	45494	311	93	93	354127	316927	30.42	24.72	11	415	d__Bacteria;p__Proteobacteria;c__Alphaproteobacteria;o__Pelagibacterales;f__Pelagibacteraceae;g__Pelagibacter;s__	Bacteria	Proteobacteria	Alphaproteobacteria	Pelagibacterales	Pelagibacteraceae	Pelagibacter	Unknown_spp	50	201	106	6	251	357	52	0.860241	0	11	82	11	0.11828	0	30122	30122	324005	0.0850599	10.1134	cell-like	no	4	10	14	9	27	Not-determined	0	NA	no viral genes detected
Capsule1_09070703	419283	22663	226	58	58	129312	106112	38.5	5.74	11	155	0	0	0	0	0	0	0	0	14	90	36	2	104	140	13	0.903226	0	9	49	9	0.155172	0	20779	20779	108533	0.160689	5.62096	cell-like	no	1	15	7	1	4	Low-quality	8.49	AAI-based (medium-confidence)	no viral genes detected
Capsule1_09141209	20609	654	3	1	1	1919	1519	64.45	0	11	1	0	0	0	0	0	0	0	0	0	1	0	0	1	1	0	1	0	0	1	0	0	0	0	0	1919	0	100	cell-like	no	0	0	0	0	0	0	0	0	0
Capsule1_09151100	4741	672	10	1	1	1204	804	34.95	0	11	2	0	0	0	0	0	0	0	0	0	1	1	0	1	2	0	1	0	0	1	0	0	0	0	0	1204	0	100	cell-like	no	0	0	0	1	0	0	0	0	0
Capsule1_09170506	7245	1006	7	1	1	1670	1270	62.36	0	11	3	0	0	0	0	0	0	0	0	0	1	0	0	1	1	2	0.333333	0	0	1	0	0	0	0	0	1670	0	33.3333	cell-like	no	0	0	0	0	0	0	0	0	0
Capsule1_10042117	478546	86829	432	133	133	646468	593268	41.57	34.2	11	723	d__Bacteria;p__Actinobacteriota;c__Actinomycetia;o__Nanopelagicales;f__Nanopelagicaceae;g__Nanopelagicus;s__Nanopelagicus sp000378865	Bacteria	Actinobacteriota	Actinomycetia	Nanopelagicales	Nanopelagicaceae	Nanopelagicus	Nanopelagicus sp000378865	107	420	107	9	527	634	80	0.876902	0	11	122	11	0.0827068	0	27432	27432	619036	0.0424337	20.6652	cell-like	no	15	23	39	21	36	Not-determined	0	NA	no viral genes detected
Capsule1_10181503	35324	916	6	2	2	2360	1560	49.42	0	1	3	0	0	0	0	0	0	0	0	0	0	1	0	0	1	2	0.333333	0	0	2	0	0	0	0	0	2360	0	33.3333	cell-like	no	0	0	0	0	0	0	0	0	0
Capsule1_10200003	14424	3321	61	6	6	11151	8751	34.22	0	1	14	0	0	0	0	0	0	0	0	2	7	2	0	9	11	3	0.785714	0	1	5	1	0.166667	0	3142	3142	8009	0.281768	2.78851	cell-like	no	0	1	2	1	0	Not-determined	0	NA	no viral genes detected; high kmer_freq may indicate large duplication; low-confidence ITR
Capsule1_11000009	244972	22445	133	38	38	144450	129250	50.26	6.9	11	170	0	0	0	0	0	0	0	0	11	106	35	1	117	152	17	0.894118	0	2	36	2	0.0526316	0	5034	5034	139416	0.0348494	25.6566	cell-like	no	2	3	12	4	5	Low-quality	2.3	AAI-based (medium-confidence)	no viral genes detected
Capsule1_11071116	1234	678	17	2	2	4540	3740	34.12	0	11	5	0	0	0	0	0	0	0	0	0	2	2	0	2	4	1	0.8	0	0	2	0	0	0	0	0	4540	0	80	cell-like	no	0	2	0	0	0	0	0	0	0
Capsule1_11080315	75231	1514	23	3	3	4944	3744	46.98	0	1	4	0	0	0	0	0	0	0	0	0	0	1	0	0	1	3	0.25	0	0	3	0	0	0	0	0	4944	0	25	cell-like	no	0	0	0	0	0	0	0	0	0
Capsule1_11082115	9547	998	16	1	1	1086	686	52.33	0	11	2	0	0	0	0	0	0	0	0	0	0	2	0	0	2	0	1	0	0	1	0	0	0	0	0	1086	0	100	cell-like	no	0	0	0	0	0	0	0	0	0
Capsule1_11232117	50869	1534	14	3	3	4401	3201	53.42	0	11	5	0	0	0	0	0	0	0	0	0	1	2	0	1	3	2	0.6	0	0	3	0	0	0	0	0	4401	0	60	cell-like	no	0	0	0	0	0	0	0	0	0
Capsule1_12081220	10160	702	7	1	1	3213	2813	38.93	0	1	3	0	0	0	0	0	0	0	0	0	0	1	0	0	1	2	0.333333	0	0	1	0	0	0	0	0	3213	0	33.3333	cell-like	no	0	0	0	0	0	0	0	0	0
Capsule1_12172006	44057	900	9	1	1	1478	1078	67.25	0	11	1	0	0	0	0	0	0	0	0	0	1	0	0	1	1	0	1	0	0	1	0	0	0	0	0	1478	0	100	cell-like	no	0	0	0	0	0	0	0	0	0
Capsule1_12220012	1215	562	3	1	1	2239	1839	24.9	0	11	4	0	0	0	0	0	0	0	0	0	4	0	0	4	4	0	1	0	0	1	0	0	0	0	0	2239	0	100	cell-like	no	0	0	0	0	0	0	0	0	0
Capsule1_13050821	20670	2441	22	5	5	10991	8991	68.5	0	11	11	0	0	0	0	0	0	0	0	1	7	0	0	8	8	3	0.727273	0	0	5	0	0	0	0	0	10991	0	72.7273	cell-like	no	0	0	0	0	1	0	0	0	0
Capsule1_13071116	1613	856	21	2	2	5300	4500	33.07	0	11	5	0	0	0	0	0	0	0	0	1	0	4	0	1	5	0	1	0	0	2	0	0	0	0	0	5300	0	100	cell-like	no	0	1	0	0	0	0	0	0	0
Capsule1_13111800	2507	1071	46	6	6	7690	5290	30.09	0	11	10	0	0	0	0	0	0	0	0	2	4	2	0	6	8	2	0.8	0	0	6	0	0	0	0	0	7690	0	80	cell-like	no	0	0	0	0	0	0	0	0	0
Capsule1_13120623	39902	2689	13	3	3	16060	14860	67.54	0	1	20	0	0	0	0	0	0	0	0	1	17	1	0	18	19	1	0.95	0	0	3	0	0	0	0	0	16060	0	95	cell-like	no	0	0	0	1	6	0	0	0	0
Capsule1_13200712	30222	767	11	1	1	1531	1131	48.1	0	11	3	0	0	0	0	0	0	0	0	0	2	0	0	2	2	1	0.666667	0	0	1	0	0	0	0	0	1531	0	66.6667	cell-like	no	1	0	0	0	1	0	0	0	0
Capsule1_13232103	14345	1177	4	1	1	4143	3743	57.63	0	11	4	0	0	0	0	0	0	0	0	0	1	2	0	1	3	1	0.75	0	0	1	0	0	0	0	0	4143	0	75	cell-like	no	0	0	0	0	0	0	0	0	0
Capsule1_14020415	7533	823	9	2	2	2312	1512	34.52	0	11	3	0	0	0	0	0	0	0	0	0	1	0	0	1	1	2	0.333333	0	0	2	0	0	0	0	0	2312	0	33.3333	cell-like	no	0	0	0	0	0	0	0	0	0
Capsule1_14140518	19330	629	5	1	1	1839	1439	34.61	0	11	3	0	0	0	0	0	0	0	0	0	1	1	0	1	2	1	0.666667	0	0	1	0	0	0	0	0	1839	0	66.6667	cell-like	no	0	0	0	0	0	0	0	0	0
Capsule1_14172301	31968	7981	165	22	22	47976	39176	64.46	0	11	59	0	0	0	0	0	0	0	0	8	20	13	0	28	41	18	0.694915	0	2	20	2	0.0909091	0	7050	7050	40926	0.146948	4.72897	cell-like	no	1	1	2	1	4	Not-determined	0	NA	no viral genes detected; high kmer_freq may indicate large duplication
Capsule1_14231507	15734	661	5	2	2	2163	1363	40.79	0	1	1	0	0	0	0	0	0	0	0	0	0	1	0	0	1	0	1	0	1	1	1	0.5	0	1066	1066	1097	0.492834	2.02908	cell-like	no	0	0	0	0	0	Not-determined	0	NA	no viral genes detected; high kmer_freq may indicate large duplication; low-confidence ITR
Capsule1_15111800	1764	731	37	2	2	2883	2083	31.3	0	11	3	0	0	0	0	0	0	0	0	0	1	2	0	1	3	0	1	0	0	2	0	0	0	0	0	2883	0	100	cell-like	no	0	0	0	0	0	0	0	0	0
Capsule1_15190003	5971	577	9	2	2	3546	2746	50.15	0	1	3	0	0	0	0	0	0	0	0	0	0	1	0	0	1	2	0.333333	0	0	2	0	0	0	0	0	3546	0	33.3333	cell-like	no	0	0	0	0	0	0	0	0	0
Capsule1_15200515	53483	5100	90	13	13	22106	16906	62.36	2.08	11	28	0	0	0	0	0	0	0	0	3	13	7	0	16	23	5	0.821429	0	0	13	0	0	0	0	0	22106	0	82.1429	cell-like	no	2	0	0	1	3	0	0	0	0
Capsule1_15201509	309078	16326	102	24	24	85367	75767	37.34	0	11	99	0	0	0	0	0	0	0	0	5	40	31	0	45	76	23	0.767677	0	3	21	3	0.125	0	6145	6145	79222	0.0719833	10.6646	cell-like	no	0	2	4	1	3	Not-determined	0	NA	no viral genes detected
Capsule1_15202111	125180	1349	7	3	3	5130	3930	38.93	0	11	6	0	0	0	0	0	0	0	0	0	3	1	0	3	4	2	0.666667	0	1	2	1	0.333333	0	1844	1844	3286	0.359454	1.85466	cell-like	no	0	1	0	0	1	Low-quality	0.72	AAI-based (medium-confidence)	no viral genes detected
Capsule1_16161522	35811	1548	24	4	4	6063	4463	45.06	0	1	7	0	0	0	0	0	0	0	0	1	2	1	0	3	4	3	0.571429	0	1	3	1	0.25	0	1605	1605	4458	0.26472	2.15861	cell-like	no	0	0	1	0	0	Not-determined	0	NA	no viral genes detected
Capsule1_17020005	123385	873	11	1	1	1035	635	53.23	0	11	1	0	0	0	0	0	0	0	0	0	0	1	0	0	1	0	1	0	0	1	0	0	0	0	0	1035	0	100	cell-like	no	0	0	0	0	0	0	0	0	0
Capsule1_17040617	38032	1122	19	2	2	6269	5469	68.2	0	11	7	0	0	0	0	0	0	0	0	2	0	1	0	2	3	4	0.428571	0	0	2	0	0	0	0	0	6269	0	42.8571	cell-like	no	0	0	0	0	0	0	0	0	0
Capsule1_18021821	340389	5148	85	10	10	15108	11108	34.29	0	11	24	0	0	0	0	0	0	0	0	1	12	5	0	13	18	6	0.75	0	1	9	1	0.1	0	1176	1176	13932	0.0778396	9.6352	cell-like	no	2	0	1	0	0	Low-quality	1.65	AAI-based (medium-confidence)	no viral genes detected
Capsule1_18041111	90999	1221	11	2	2	3367	2567	44.57	0	1	6	0	0	0	0	0	0	0	0	1	2	1	0	3	4	2	0.666667	0	0	2	0	0	0	0	0	3367	0	66.6667	cell-like	no	0	0	0	1	0	0	0	0	0
Capsule1_18080819	130577	34043	290	71	71	269148	240748	47.46	7.37	11	279	0	0	0	0	0	0	0	0	32	147	65	1	179	244	34	0.874552	0	9	62	9	0.126761	0	14976	14976	254172	0.0556422	15.7174	cell-like	no	4	10	23	4	8	Not-determined	0	NA	no viral genes detected
Capsule1_18100003	26557	2308	14	4	4	13745	12145	36.43	0	11	13	0	0	0	0	0	0	0	0	1	7	1	0	8	9	4	0.692308	0	0	4	0	0	0	0	0	13745	0	69.2308	cell-like	no	0	0	0	0	0	0	0	0	0
Capsule1_19201920	159680	17107	78	25	25	116264	106264	29.47	8.33	11	125	d__Bacteria;p__Proteobacteria;c__Alphaproteobacteria;o__Pelagibacterales;f__Pelagibacteraceae;g__Pelagibacter_A;s__	Bacteria	Proteobacteria	Alphaproteobacteria	Pelagibacterales	Pelagibacteraceae	Pelagibacter_A	Unknown_spp	19	56	35	2	75	110	13	0.88	0	3	22	3	0.12	0	9210	9210	107054	0.0792163	11.1088	cell-like	no	1	5	11	1	3	Low-quality	6.98	AAI-based (medium-confidence)	no viral genes detected
Capsule1_20192215	6304	2155	85	5	5	9960	7960	33.32	5.89	11	12	0	0	0	0	0	0	0	0	1	7	3	0	8	11	1	0.916667	0	1	4	1	0.2	0	3213	3213	6747	0.32259	2.84158	cell-like	no	0	0	0	0	0	Not-determined	0	NA	no viral genes detected
Capsule1_21052110	158046	8179	58	17	17	45397	38597	29.77	0	11	55	0	0	0	0	0	0	0	0	4	28	14	2	32	46	7	0.836364	0	1	16	1	0.0588235	0	1710	1710	43687	0.0376677	22.2037	cell-like	no	0	4	1	3	8	Low-quality	3.57	AAI-based (high-confidence)	no viral genes detected
Capsule1_21130906	318214	26573	154	40	40	176997	160997	31.88	9.87	11	196	0	0	0	0	0	0	0	0	36	80	52	2	116	168	26	0.857143	0	6	34	6	0.15	0	39043	39043	137954	0.220586	3.88576	cell-like	no	4	9	6	6	5	Low-quality	17.53	AAI-based (medium-confidence)	no viral genes detected
Capsule1_21211205	47595	1882	11	4	4	12358	10758	65.75	0	11	9	0	0	0	0	0	0	0	0	2	0	6	0	2	8	1	0.888889	0	2	2	2	0.5	0	4069	4069	8289	0.32926	2.69965	cell-like	no	0	0	0	3	0	Low-quality	0.52	HMM-based (lower-bound)	NA
Capsule1_22022315	51942	3077	34	4	4	9351	7751	36.82	0.14	1	8	0	0	0	0	0	0	0	0	0	0	6	0	0	6	2	0.75	0	2	2	2	0.5	0	3566	3566	5785	0.38135	1.9667	cell-like	no	0	0	0	0	0	Low-quality	0.39	AAI-based (medium-confidence)	no viral genes detected
Capsule1_22221618	208740	12402	158	30	30	59957	47957	33.88	3.61	11	71	0	0	0	0	0	0	0	0	8	34	18	2	42	60	9	0.84507	0	8	22	8	0.266667	0	16649	16649	42452	0.277682	3.0433	cell-like	no	0	2	1	2	1	Low-quality	6.75	AAI-based (medium-confidence)	no viral genes detected
Capsule1_23082200	59325	3135	23	9	9	18605	15005	31.62	2.49	11	20	0	0	0	0	0	0	0	0	1	12	3	0	13	16	4	0.8	0	4	5	4	0.444444	0	9491	9491	9114	0.510132	1.56822	cell-like	no	0	0	0	2	0	Not-determined	0	NA	no viral genes detected
Capsule1_23121715	6611	1652	19	4	4	10786	9186	53.08	0	11	15	0	0	0	0	0	0	0	0	0	8	5	0	8	13	2	0.866667	0	1	3	1	0.25	0	1679	1679	9107	0.155665	5.56752	cell-like	no	0	2	2	0	0	Not-determined	0	NA	no viral genes detected; low-confidence ITR
Capsule1_23122118	13575	845	3	1	1	2964	2564	28.24	0	11	3	0	0	0	0	0	0	0	0	0	1	2	0	1	3	0	1	0	0	1	0	0	0	0	0	2964	0	100	cell-like	no	0	0	0	0	0	0	0	0	0
Capsule1_23171618	42670	1187	17	1	1	1460	1060	63.02	0	11	1	0	0	0	0	0	0	0	0	0	0	1	0	0	1	0	1	0	0	1	0	0	0	0	0	1460	0	100	cell-like	no	0	0	0	0	0	0	0	0	0
Capsule1_23172114	18402	947	17	2	2	4834	4034	61.7	0	1	8	0	0	0	0	0	0	0	0	0	0	4	0	0	4	4	0.5	0	1	1	1	0.5	0	2360	2360	2474	0.488209	1.02415	cell-like	no	0	0	0	0	0	Not-determined	0	NA	no viral genes detected; high kmer_freq may indicate large duplication; low-confidence ITR
Capsule1_23221703	211057	5885	20	8	8	36062	32862	36.39	0	11	43	0	0	0	0	0	0	0	0	1	28	5	0	29	34	9	0.790698	0	2	6	2	0.25	0	8565	8565	27497	0.237508	3.32915	cell-like	no	1	0	0	0	0	Low-quality	0.69	HMM-based (lower-bound)	NA
Capsule1_23231513	233699	1244	23	1	1	1973	1573	40.88	0	11	2	0	0	0	0	0	0	0	0	0	1	1	0	1	2	0	1	1	0	0	1	1	1973	0	1973	0	1	1	Undetermined	NA	0	0	2	0	0	Not-determined	0	NA	no viral genes detected; high kmer_freq may indicate large duplication; low-confidence ITR
Capsule1_12081110	2575	535	4	1	1	1691	1291	27.11	0	11	2	0	0	0	0	0	0	0	0	0	2	0	0	2	2	0	1	1	0	0	1	1	1691	0	1691	0	1	1	Undetermined	NA	0	0	0	0	0	Low-quality	4.62	HMM-based (lower-bound)	high kmer_freq may indicate large duplication; low-confidence ITR
Capsule1_23022100	1427	444	5	1	1	1447	1047	42.02	0	11	2	0	0	0	0	0	0	0	0	0	2	0	0	2	2	0	1	1	0	0	1	1	1447	0	1447	0	1	1	Undetermined	NA	0	0	0	0	0	Low-quality	2.52	AAI-based (high-confidence)	low-confidence DTR
Capsule1_11212218	15469	541	6	1	1	1202	802	31.3	0	11	2	0	0	0	0	0	0	0	0	0	2	0	0	2	2	0	1	1	0	0	1	1	1202	0	1202	0	1	1	Undetermined	NA	0	0	0	0	0	Not-determined	0	NA	no viral genes detected
Capsule1_15141409	125969	677	10	1	1	1136	736	47.15	0	11	1	0	0	0	0	0	0	0	0	0	1	0	0	1	1	0	1	1	0	0	1	1	1136	0	1136	0	1	1	Undetermined	NA	0	1	0	0	0	Low-quality	2.56	AAI-based (medium-confidence)	NA
Capsule1_00040609	126887	664	2	1	1	2319	1919	46.38	0	11	4	0	0	0	0	0	0	0	0	0	0	0	0	0	0	0	0	0	0	1	0	0	0	0	0	2319	0	0	Undetermined	NA	0	0	0	0	0	0	0	0	0
Capsule1_00190103	25146	584	5	1	1	1412	1012	47.83	0	1	2	0	0	0	0	0	0	0	0	0	0	0	0	0	0	0	0	0	0	1	0	0	0	0	0	1412	0	0	Undetermined	NA	0	0	0	0	0	0	0	0	0
Capsule1_00231312	4277	445	3	1	1	1061	661	36.91	0	1	2	0	0	0	0	0	0	0	0	0	0	0	0	0	0	0	0	0	0	1	0	0	0	0	0	1061	0	0	Undetermined	NA	0	0	0	0	0	0	0	0	0
Capsule1_00232106	4411	1138	69	2	2	3162	2362	28.92	0	11	4	0	0	0	0	0	0	0	0	0	4	0	0	4	4	0	1	0	2	0	2	1	0	3162	3162	0	1	1	Undetermined	NA	0	0	2	0	0	Not-determined	0	NA	no viral genes detected
Capsule1_00232118	9726	381	1	1	1	1273	873	43.64	0	11	1	0	0	0	0	0	0	0	0	0	1	0	0	1	1	0	1	0	1	0	1	1	0	1273	1273	0	1	1	Undetermined	NA	0	0	0	0	0	Not-determined	0	NA	no viral genes detected
Capsule1_02112015	47768	874	2	1	1	3020	2620	54.54	0	11	6	0	0	0	0	0	0	0	0	0	0	0	0	0	0	0	0	0	0	1	0	0	0	0	0	3020	0	0	Undetermined	NA	0	0	0	0	0	0	0	0	0
Capsule1_02150215	42461	1076	13	3	3	5729	4529	56.61	0	1	9	0	0	0	0	0	0	0	0	0	0	0	0	0	0	0	0	0	0	3	0	0	0	0	0	5729	0	0	Undetermined	NA	0	0	0	0	0	0	0	0	0
Capsule1_02160709	35487	478	1	1	1	1643	1243	33.15	0	1	2	0	0	0	0	0	0	0	0	0	0	0	0	0	0	0	0	0	0	1	0	0	0	0	0	1643	0	0	Undetermined	NA	0	0	0	0	0	0	0	0	0
Capsule1_02231720	8946	579	7	1	1	1225	825	55.52	0	11	2	0	0	0	0	0	0	0	0	1	1	0	0	2	2	0	1	0	1	0	1	1	0	1225	1225	0	1	1	Undetermined	NA	0	0	0	0	0	Not-determined	0	NA	no viral genes detected
Capsule1_03020812	14879	680	12	1	1	1156	756	53.7	0	11	1	0	0	0	0	0	0	0	0	0	0	0	0	0	0	0	0	0	0	1	0	0	0	0	0	1156	0	0	Undetermined	NA	0	0	0	0	0	0	0	0	0
Capsule1_03072319	11409	778	12	1	1	1199	799	39.67	0	11	2	0	0	0	0	0	0	0	0	0	0	2	0	0	2	0	1	0	1	0	1	1	0	1199	1199	0	1	1	Undetermined	NA	0	0	0	2	0	Low-quality	2.07	AAI-based (high-confidence)	no viral genes detected; high kmer_freq may indicate large duplication; low-confidence ITR
Capsule1_03081706	18166	598	5	1	1	1093	693	46.9	0	11	1	0	0	0	0	0	0	0	0	0	0	1	0	0	1	0	1	0	1	0	1	1	0	1093	1093	0	1	1	Undetermined	NA	0	1	0	0	0	Low-quality	0.61	HMM-based (lower-bound)	NA
Capsule1_03141300	97051	861	11	1	1	1220	820	44.39	0	1	1	0	0	0	0	0	0	0	0	0	0	0	0	0	0	0	0	0	0	1	0	0	0	0	0	1220	0	0	Undetermined	NA	0	0	0	0	0	0	0	0	0
Capsule1_03190822	11760	413	11	1	1	1668	1268	37.7	0	11	2	0	0	0	0	0	0	0	0	0	2	0	0	2	2	0	1	0	1	0	1	1	0	1668	1668	0	1	1	Undetermined	NA	0	2	0	0	0	Low-quality	1.04	AAI-based (medium-confidence)	no viral genes detected; high kmer_freq may indicate large duplication; low-confidence ITR
Capsule1_03200023	71364	917	4	1	1	2704	2304	50.69	0	1	1	0	0	0	0	0	0	0	0	0	0	0	0	0	0	0	0	0	0	1	0	0	0	0	0	2704	0	0	Undetermined	NA	0	0	0	0	0	0	0	0	0
Capsule1_04111100	97895	1851	24	3	3	10840	9640	50.91	0	1	16	0	0	0	0	0	0	0	0	0	0	0	0	0	0	0	0	0	0	3	0	0	0	0	0	10840	0	0	Undetermined	NA	0	0	0	0	0	0	0	0	0
Capsule1_04190909	1319	645	36	1	1	1021	621	38.65	0	11	1	0	0	0	0	0	0	0	0	0	0	0	1	0	0	0	0	0	0	1	0	0	0	0	0	1021	0	0	Undetermined	NA	0	0	0	0	0	0	0	0	0
Capsule1_05081306	44431	2443	17	3	3	8703	7503	51.7	0	11	3	0	0	0	0	0	0	0	0	0	0	0	0	0	0	0	0	0	0	3	0	0	0	0	0	8703	0	0	Undetermined	NA	0	0	0	0	0	0	0	0	0
Capsule1_05112310	6437	494	9	1	1	1316	916	53.06	0	NA	0	0	0	0	0	0	0	0	0	0	0	0	0	0	0	0	0	0	1	0	1	1	0	0	0	0	0	0	Undetermined	NA	0	0	0	0	0	0	0	0	0
Capsule1_05141413	14379	399	1	1	1	1123	723	46.89	0	1	1	0	0	0	0	0	0	0	0	0	0	0	0	0	0	0	0	0	0	1	0	0	0	0	0	1123	0	0	Undetermined	NA	0	0	0	0	0	0	0	0	0
Capsule1_05170721	48893	644	9	1	1	1247	847	56.43	0	11	1	0	0	0	0	0	0	0	0	0	0	0	0	0	0	0	0	0	0	1	0	0	0	0	0	1247	0	0	Undetermined	NA	0	0	0	0	0	0	0	0	0
Capsule1_05192103	13031	397	2	1	1	1033	633	36.49	0	1	1	0	0	0	0	0	0	0	0	0	0	0	1	0	0	0	0	0	0	1	0	0	0	0	0	1033	0	0	Undetermined	NA	0	0	0	0	0	0	0	0	0
Capsule1_06021614	90404	1300	9	2	2	3973	3173	60.67	0	1	2	0	0	0	0	0	0	0	0	0	0	0	0	0	0	0	0	0	0	2	0	0	0	0	0	3973	0	0	Undetermined	NA	0	0	0	0	0	0	0	0	0
Capsule1_06050510	65075	496	3	1	1	1595	1195	26.11	0	11	3	0	0	0	0	0	0	0	0	0	1	2	0	1	3	0	1	0	1	0	1	1	0	1595	1595	0	1	1	Undetermined	NA	0	0	0	0	0	Not-determined	0	NA	no viral genes detected
Capsule1_06200821	91248	1395	12	1	1	3538	3138	51.37	0	1	9	0	0	0	0	0	0	0	0	0	0	0	0	0	0	0	0	0	0	1	0	0	0	0	0	3538	0	0	Undetermined	NA	0	0	0	0	0	0	0	0	0
Capsule1_07020309	3273	753	15	1	1	1154	754	53.45	0	1	2	0	0	0	0	0	0	0	0	0	0	0	0	0	0	0	0	0	0	1	0	0	0	0	0	1154	0	0	Undetermined	NA	0	0	0	0	0	0	0	0	0
Capsule1_08080409	36198	1118	4	1	1	7418	7018	52.98	0	1	8	0	0	0	0	0	0	0	0	0	0	0	0	0	0	0	0	0	0	1	0	0	0	0	0	7418	0	0	Undetermined	NA	0	0	0	0	0	0	0	0	0
Capsule1_09220021	3400	684	11	2	2	4068	3268	52.29	0	1	6	0	0	0	0	0	0	0	0	0	0	0	0	0	0	0	0	0	0	2	0	0	0	0	0	4068	0	0	Undetermined	NA	0	0	0	0	0	0	0	0	0
Capsule1_09230317	13708	893	12	1	1	1145	745	59.46	0	1	1	0	0	0	0	0	0	0	0	0	0	0	0	0	0	0	0	0	0	1	0	0	0	0	0	1145	0	0	Undetermined	NA	0	0	0	0	0	0	0	0	0
Capsule1_10190621	83602	862	14	1	1	1083	683	59.15	0	1	2	0	0	0	0	0	0	0	0	0	0	0	0	0	0	0	0	0	0	1	0	0	0	0	0	1083	0	0	Undetermined	NA	0	0	0	0	0	0	0	0	0
Capsule1_11201412	25246	531	3	1	1	1042	642	47.51	0	11	1	0	0	0	0	0	0	0	0	0	0	0	1	0	0	0	0	0	0	1	0	0	0	0	0	1042	0	0	Undetermined	NA	0	0	0	0	0	0	0	0	0
Capsule1_11232204	11314	1706	20	2	2	3620	2820	56.17	0	1	5	0	0	0	0	0	0	0	0	0	0	0	0	0	0	0	0	0	0	2	0	0	0	0	0	3620	0	0	Undetermined	NA	0	0	0	0	0	0	0	0	0
Capsule1_12011900	18042	776	7	1	1	1645	1245	44.74	0	1	2	0	0	0	0	0	0	0	0	0	0	0	0	0	0	0	0	0	0	1	0	0	0	0	0	1645	0	0	Undetermined	NA	0	0	0	0	0	0	0	0	0
Capsule1_12140404	21654	586	7	2	2	2283	1483	43.63	0	1	2	0	0	0	0	0	0	0	0	0	0	0	0	0	0	0	0	0	0	2	0	0	0	0	0	2283	0	0	Undetermined	NA	0	0	0	0	0	0	0	0	0
Capsule1_13020211	39133	652	12	1	1	1345	945	36.61	0	1	1	0	0	0	0	0	0	0	0	0	0	0	0	0	0	0	0	0	0	1	0	0	0	0	0	1345	0	0	Undetermined	NA	0	0	0	0	0	0	0	0	0
Capsule1_13130914	5495	778	12	1	1	1172	772	31.35	0	11	1	0	0	0	0	0	0	0	0	0	0	0	0	0	0	0	0	0	0	1	0	0	0	0	0	1172	0	0	Undetermined	NA	0	0	0	0	0	0	0	0	0
Capsule1_14162203	95002	1341	14	1	1	2232	1832	46.12	0	1	2	0	0	0	0	0	0	0	0	0	0	0	0	0	0	0	0	0	0	1	0	0	0	0	0	2232	0	0	Undetermined	NA	0	0	0	0	0	0	0	0	0
Capsule1_15001819	27888	732	3	1	1	1709	1309	41.48	0	11	1	0	0	0	0	0	0	0	0	0	1	0	0	1	1	0	1	0	1	0	1	1	0	1709	1709	0	1	1	Undetermined	NA	0	0	0	0	0	Not-determined	0	NA	no viral genes detected
Capsule1_15021212	56375	818	6	2	2	3771	2971	45.2	0	1	2	0	0	0	0	0	0	0	0	0	0	0	0	0	0	0	0	0	0	2	0	0	0	0	0	3771	0	0	Undetermined	NA	0	0	0	0	0	0	0	0	0
Capsule1_18112320	49040	961	15	1	1	1228	828	56.52	0	1	1	0	0	0	0	0	0	0	0	0	0	0	0	0	0	0	0	0	0	1	0	0	0	0	0	1228	0	0	Undetermined	NA	0	0	0	0	0	0	0	0	0
Capsule1_19132215	3709	446	10	1	1	1295	895	70.17	0	1	1	0	0	0	0	0	0	0	0	0	0	0	0	0	0	0	0	0	0	1	0	0	0	0	0	1295	0	0	Undetermined	NA	0	0	0	0	0	0	0	0	0
Capsule1_20111018	44354	648	7	1	1	1138	738	60.03	0	1	1	0	0	0	0	0	0	0	0	0	0	0	0	0	0	0	0	0	0	1	0	0	0	0	0	1138	0	0	Undetermined	NA	0	0	0	0	0	0	0	0	0
Capsule1_22011215	23823	592	13	1	1	1064	664	53.77	0	11	1	0	0	0	0	0	0	0	0	0	0	0	0	0	0	0	0	0	0	1	0	0	0	0	0	1064	0	0	Undetermined	NA	0	0	0	0	0	0	0	0	0
Capsule1_22111621	107791	619	2	1	1	1961	1561	43.5	0	11	1	0	0	0	0	0	0	0	0	0	1	0	0	1	1	0	1	0	1	0	1	1	0	1961	1961	0	1	1	Undetermined	NA	0	0	1	0	0	Not-determined	0	NA	no viral genes detected; low-confidence DTR
Capsule1_22210315	89240	597	5	1	1	2489	2089	46.86	0	1	2	0	0	0	0	0	0	0	0	0	0	0	0	0	0	0	0	0	0	1	0	0	0	0	0	2489	0	0	Undetermined	NA	0	0	0	0	0	0	0	0	0
Capsule1_23200120	2335	876	32	1	1	1066	666	62.31	0	11	1	0	0	0	0	0	0	0	0	0	0	0	0	0	0	0	0	0	0	1	0	0	0	0	0	1066	0	0	Undetermined	NA	0	0	0	0	0	0	0	0	0
Capsule1_23201116	13190	512	5	1	1	1142	742	27.76	0	1	2	0	0	0	0	0	0	0	0	0	0	0	0	0	0	0	0	0	0	1	0	0	0	0	0	1142	0	0	Undetermined	NA	0	0	0	0	0	0	0	0	0
Capsule1_23231203	16304	952	12	1	1	2405	2005	43.54	0	1	1	0	0	0	0	0	0	0	0	0	0	0	0	0	0	0	0	0	0	1	0	0	0	0	0	2405	0	0	Undetermined	NA	0	0	0	0	0	0	0	0	0
Capsule1_22101623	400139	53808	154	39	39	369079	353479	41.63	0	11	453	0	0	0	0	0	0	0	0	21	78	11	53	99	110	290	0.242826	16	17	6	33	0.846154	266644	77167	343811	14764	0.931538	0.260672	virus-like	NA	2	36	11	3	4	High-quality	100	AAI-based (high-confidence)	contig >1.5x longer than expected genome length
Capsule1_15022307	397673	41598	26	12	12	268360	263560	32.67	0	11	330	0	0	0	0	0	0	0	0	17	55	21	29	72	93	208	0.281818	10	2	0	12	1	252755	15605	268360	0	1	0.281818	virus-like	NA	1	25	7	1	5	High-quality	91.52	AAI-based (medium-confidence)	NA
Capsule1_00200317	331686	47638	40	15	15	307907	301907	46.16	0	11	385	0	0	0	0	0	0	0	0	8	84	32	74	92	124	187	0.322078	9	6	0	15	1	181113	121372	302485	0	0.982391	0.327851	virus-like	NA	3	30	15	0	1	Medium-quality	87.52	AAI-based (high-confidence)	NA
Capsule1_23080919	309714	29569	20	5	5	180718	178718	37.65	0	11	207	0	0	0	0	0	0	0	0	7	19	1	137	26	27	43	0.130435	4	1	0	5	1	174402	6316	180718	0	1	0.130435	virus-like	NA	1	38	8	1	1	High-quality	93.27	AAI-based (high-confidence)	NA
Capsule1_08110621	590386	25332	12	5	5	152170	150170	31.01	0	11	219	0	0	0	0	0	0	0	0	9	32	4	26	41	45	148	0.205479	5	0	0	5	1	152170	0	152170	0	1	0.205479	virus-like	NA	0	18	6	1	2	High-quality	92.79	AAI-based (medium-confidence)	NA
Capsule1_18092206	110300	23177	29	16	16	152802	146402	30.91	0	11	203	0	0	0	0	0	0	0	0	9	42	5	25	51	56	122	0.275862	13	3	0	16	1	143931	8871	152802	0	1	0.275862	virus-like	NA	0	15	6	0	2	High-quality	93.25	AAI-based (medium-confidence)	NA
Capsule1_12052204	200339	23939	25	11	11	150178	145778	32.56	0	11	194	0	0	0	0	0	0	0	0	8	37	12	37	45	57	100	0.293814	8	3	0	11	1	141931	5212	147143	0	0.979791	0.299875	virus-like	NA	0	17	8	0	2	Medium-quality	89.81	AAI-based (medium-confidence)	NA
Capsule1_00200412	206583	27961	25	6	6	166124	163724	42.57	0	11	231	0	0	0	0	0	0	0	0	14	32	8	20	46	54	157	0.233766	3	1	2	4	0.666667	139858	1403	141261	4274	0.850335	0.274911	virus-like	NA	1	14	10	0	1	High-quality	99.48	AAI-based (medium-confidence)	NA
Capsule1_02072008	119946	26932	280	77	77	212797	181997	32.46	0.5	11	210	0	0	0	0	0	0	0	0	5	17	45	22	22	67	121	0.319048	35	41	1	76	0.987013	132811	74637	207448	1072	0.974863	0.327274	virus-like	NA	0	9	7	3	1	Low-quality	40.74	AAI-based (medium-confidence)	NA
Capsule1_03191506	190546	25004	87	29	29	179824	168224	30.43	0	11	268	0	0	0	0	0	0	0	0	6	45	8	24	51	59	185	0.220149	16	13	0	29	1	127879	51945	179824	0	1	0.220149	virus-like	NA	3	17	3	2	3	Medium-quality	53.06	AAI-based (medium-confidence)	NA
Capsule1_03070320	339681	21933	28	12	12	141883	137083	32.78	0	11	161	0	0	0	0	0	0	0	0	13	34	8	16	47	55	90	0.341615	9	2	1	11	0.916667	125057	15805	140862	1021	0.992804	0.344091	virus-like	NA	1	10	6	1	0	Medium-quality	67.54	AAI-based (high-confidence)	NA
Capsule1_21230511	292400	23769	24	12	12	152976	148176	48.49	0	11	210	0	0	0	0	0	0	0	0	8	44	17	16	52	69	125	0.328571	6	6	0	12	1	114324	37833	152157	0	0.994646	0.33034	virus-like	NA	8	8	8	3	3	Medium-quality	89.89	AAI-based (medium-confidence)	NA
Capsule1_12201523	242046	26123	78	28	28	168895	157695	38.62	0	11	224	0	0	0	0	0	0	0	0	9	46	7	37	55	62	125	0.276786	17	10	1	27	0.964286	114082	35994	150076	1081	0.888576	0.311494	virus-like	NA	0	15	6	0	1	Low-quality	42.06	AAI-based (medium-confidence)	NA
Capsule1_19140003	784162	19440	48	21	21	119181	110781	37.55	0	11	175	0	0	0	0	0	0	0	0	0	24	2	56	24	26	93	0.148571	17	2	2	19	0.904762	113768	2687	116455	2726	0.977127	0.152049	virus-like	NA	1	33	6	0	0	Medium-quality	75.62	AAI-based (high-confidence)	NA
Capsule1_08141216	144513	23419	141	45	45	170193	152193	29.89	0	11	167	0	0	0	0	0	0	0	0	1	21	41	24	22	63	80	0.377246	26	19	0	45	1	110840	49212	160052	0	0.940415	0.401148	virus-like	NA	1	12	9	3	1	Low-quality	36.92	HMM-based (lower-bound)	NA
Capsule1_12141319	320927	24114	48	22	22	159049	150249	38.66	0	11	295	0	0	0	0	0	0	0	0	9	52	9	19	61	70	206	0.237288	11	9	2	20	0.909091	103263	50668	153931	5118	0.967821	0.245178	virus-like	NA	3	12	5	3	10	High-quality	100	AAI-based (medium-confidence)	contig >1.5x longer than expected genome length
Capsule1_17201816	144685	16558	48	13	13	117657	112457	33.94	0	11	171	0	0	0	0	0	0	0	0	8	23	5	15	31	36	120	0.210526	8	5	0	13	1	95991	21666	117657	0	1	0.210526	virus-like	NA	1	10	3	1	0	Medium-quality	60.79	AAI-based (medium-confidence)	NA
Capsule1_07011423	168891	21672	48	20	20	135289	127289	54.63	0	11	175	0	0	0	0	0	0	0	0	2	22	29	28	24	53	94	0.302857	9	11	0	20	1	95145	40144	135289	0	1	0.302857	virus-like	NA	1	11	3	3	1	Medium-quality	76.5	AAI-based (high-confidence)	NA
Capsule1_06020403	287347	18490	90	24	24	112092	102492	39.75	0	11	146	0	0	0	0	0	0	0	0	2	15	3	53	17	20	73	0.136986	14	9	1	23	0.958333	94115	16867	110982	1110	0.990097	0.138356	virus-like	NA	0	29	11	2	1	Medium-quality	62.42	AAI-based (medium-confidence)	NA
Capsule1_09230519	282653	15791	26	12	12	93963	89163	34.48	0	11	108	0	0	0	0	0	0	0	0	0	16	3	12	16	19	77	0.175926	11	1	0	12	1	92732	1231	93963	0	1	0.175926	virus-like	NA	0	7	3	3	0	High-quality	100	AAI-based (high-confidence)	NA
Capsule1_15162122	197755	18296	27	15	15	125385	119385	39.1	0	11	187	0	0	0	0	0	0	0	0	4	27	9	63	31	40	84	0.213904	14	1	0	15	1	89549	34193	123742	0	0.986896	0.216744	virus-like	NA	0	37	12	1	1	Medium-quality	74.01	AAI-based (high-confidence)	NA
Capsule1_05221007	218326	15030	27	10	10	95308	91308	32.9	0	11	112	0	0	0	0	0	0	0	0	2	16	2	8	18	20	84	0.178571	8	2	0	10	1	88938	6370	95308	0	1	0.178571	virus-like	NA	0	5	6	2	1	Medium-quality	80.67	AAI-based (medium-confidence)	NA
Capsule1_09230305	207232	14992	17	6	6	101790	99390	39.86	0	11	129	0	0	0	0	0	0	0	0	1	18	2	62	19	21	46	0.162791	4	2	0	6	1	85606	9180	94786	0	0.931192	0.17482	virus-like	NA	2	40	10	0	1	Medium-quality	53.56	AAI-based (medium-confidence)	NA
Capsule1_23091916	248934	19823	46	18	18	112140	104940	38.02	0	11	174	0	0	0	0	0	0	0	0	7	27	11	14	34	45	115	0.258621	11	6	1	17	0.944444	81595	29497	111092	1048	0.990655	0.26106	virus-like	NA	2	13	7	0	2	Medium-quality	70.49	AAI-based (medium-confidence)	NA
Capsule1_05012113	647098	16101	23	12	12	89179	84379	40.2	0	11	118	0	0	0	0	0	0	0	0	0	17	2	51	17	19	48	0.161017	11	1	0	12	1	79660	2002	81662	0	0.915709	0.175839	virus-like	NA	1	37	5	0	1	Low-quality	47.73	AAI-based (medium-confidence)	NA
Capsule1_12000910	271367	14165	20	9	9	83594	79994	44.69	0	11	110	0	0	0	0	0	0	0	0	0	26	2	22	26	28	60	0.254545	7	2	0	9	1	77926	5668	83594	0	1	0.254545	virus-like	NA	0	23	2	1	2	High-quality	100	AAI-based (high-confidence)	contig >1.5x longer than expected genome length
Capsule1_04051316	185327	13649	29	10	10	82084	78084	30.66	0	11	71	0	0	0	0	0	0	0	0	4	10	3	9	14	17	45	0.239437	7	3	0	10	1	77297	4410	81707	0	0.995407	0.240541	virus-like	NA	0	11	4	0	0	Low-quality	46.62	AAI-based (medium-confidence)	NA
Capsule1_09220303	628735	12938	35	17	17	87296	80496	33.98	0	11	112	0	0	0	0	0	0	0	0	5	13	8	13	18	26	73	0.232143	11	4	2	15	0.882353	76291	7993	84284	3012	0.965497	0.240439	virus-like	NA	0	6	2	0	1	Medium-quality	51.61	AAI-based (medium-confidence)	NA
Capsule1_16052315	137313	14705	51	17	17	95667	88867	44.46	0	11	108	0	0	0	0	0	0	0	0	1	9	4	34	10	14	60	0.12963	11	4	2	15	0.882353	75884	6490	82374	10408	0.861049	0.150548	virus-like	NA	1	27	5	0	0	Medium-quality	79.93	AAI-based (high-confidence)	NA
Capsule1_05221507	592098	15106	13	6	6	79844	77444	42.75	0	11	93	0	0	0	0	0	0	0	0	0	30	1	17	30	31	45	0.333333	5	1	0	6	1	75129	4715	79844	0	1	0.333333	virus-like	NA	1	17	1	1	1	High-quality	100	AAI-based (high-confidence)	NA
Capsule1_05180320	240974	12675	7	3	3	75007	73807	34.68	0	11	47	0	0	0	0	0	0	0	0	1	7	2	6	8	10	31	0.212766	3	0	0	3	1	75007	0	75007	0	1	0.212766	virus-like	NA	0	7	1	2	0	Medium-quality	81.89	AAI-based (high-confidence)	NA
Capsule1_06142321	283681	14099	95	25	25	104673	94673	39.76	0	11	145	0	0	0	0	0	0	0	0	6	30	8	32	36	44	69	0.303448	17	8	0	25	1	74881	29379	104260	0	0.996054	0.30465	virus-like	NA	1	18	5	0	0	Low-quality	29.34	AAI-based (medium-confidence)	NA
Capsule1_15091114	182459	13036	32	16	16	84610	78210	35.87	0	11	115	0	0	0	0	0	0	0	0	1	18	4	7	19	23	85	0.2	8	6	2	14	0.875	72780	9752	82532	2078	0.97544	0.205036	virus-like	NA	0	9	4	1	1	High-quality	100	AAI-based (medium-confidence)	NA
Capsule1_02230003	210408	10481	75	20	20	79638	71638	40.33	0	11	110	0	0	0	0	0	0	0	0	1	17	1	36	18	19	55	0.172727	16	4	0	20	1	72151	7487	79638	0	1	0.172727	virus-like	NA	0	23	6	0	2	Medium-quality	88.69	AAI-based (high-confidence)	NA
Capsule1_04220315	112065	13149	61	21	21	86043	77643	30.57	0	11	113	0	0	0	0	0	0	0	0	2	27	2	14	29	31	68	0.274336	15	5	1	20	0.952381	71600	10971	82571	1076	0.959648	0.285872	virus-like	NA	0	13	4	0	0	Medium-quality	50.8	AAI-based (high-confidence)	NA
Capsule1_21022015	250073	13745	32	8	8	82016	78816	44.64	0	11	113	0	0	0	0	0	0	0	0	3	26	1	9	29	30	74	0.265487	7	1	0	8	1	71564	10452	82016	0	1	0.265487	virus-like	NA	0	12	4	0	1	Medium-quality	75.47	AAI-based (medium-confidence)	NA
Capsule1_09051700	233694	17051	43	17	17	119400	112600	38.86	0	11	159	0	0	0	0	0	0	0	0	9	33	5	21	42	47	91	0.295597	8	9	0	17	1	70403	48997	119400	0	1	0.295597	virus-like	NA	2	15	8	0	0	Medium-quality	81.28	AAI-based (high-confidence)	NA
Capsule1_09232116	151648	16558	115	42	42	122822	106022	28.86	1.14	11	129	0	0	0	0	0	0	0	0	7	10	22	25	17	39	65	0.302326	20	19	3	39	0.928571	69664	49347	119011	3811	0.968971	0.312007	virus-like	NA	1	4	6	4	0	Low-quality	45.73	AAI-based (medium-confidence)	NA
Capsule1_05162221	209423	12998	23	10	10	74564	70564	39.92	0	11	99	0	0	0	0	0	0	0	0	0	12	2	37	12	14	48	0.141414	7	3	0	10	1	67168	7396	74564	0	1	0.141414	virus-like	NA	1	28	3	0	0	Low-quality	42.33	AAI-based (medium-confidence)	NA
Capsule1_11201423	149567	11458	16	6	6	69276	66876	37.9	0	11	80	0	0	0	0	0	0	0	0	0	20	2	19	20	22	39	0.275	4	2	0	6	1	67045	2231	69276	0	1	0.275	virus-like	NA	0	23	3	0	1	High-quality	100	AAI-based (high-confidence)	contig >1.5x longer than expected genome length
Capsule1_06112116	114978	12116	39	4	4	73734	72134	41.57	0	11	117	0	0	0	0	0	0	0	0	0	7	7	9	7	14	94	0.119658	2	2	0	4	1	66847	6887	73734	0	1	0.119658	virus-like	NA	1	5	1	1	1	High-quality	100	AAI-based (medium-confidence)	NA
Capsule1_21141800	153325	34901	415	123	123	238841	189641	26.09	2.44	11	219	0	0	0	0	0	0	0	0	6	16	52	28	22	74	117	0.3379	30	88	5	118	0.95935	65450	164945	230395	6813	0.964638	0.350287	virus-like	NA	2	10	9	2	2	Low-quality	44.93	AAI-based (medium-confidence)	NA
Capsule1_02100522	158551	16664	17	7	7	105016	102216	42.85	0	11	105	0	0	0	0	0	0	0	0	6	12	4	18	18	22	65	0.209524	6	1	0	7	1	64832	21614	86446	0	0.82317	0.254533	virus-like	NA	2	8	9	0	1	Low-quality	47.63	AAI-based (high-confidence)	NA
Capsule1_05222108	58698	11400	62	19	19	83949	76349	39.96	0	11	127	0	0	0	0	0	0	0	0	3	16	3	30	19	22	75	0.173228	12	6	1	18	0.947368	64807	17936	82743	1206	0.985634	0.175753	virus-like	NA	0	18	6	1	1	Low-quality	45.84	AAI-based (medium-confidence)	NA
Capsule1_12211304	146034	12393	46	15	15	73297	67297	33.33	0	11	89	0	0	0	0	0	0	0	0	0	11	1	7	11	12	70	0.134831	11	4	0	15	1	64454	8843	73297	0	1	0.134831	virus-like	NA	0	5	6	1	0	Medium-quality	62.97	AAI-based (high-confidence)	NA
Capsule1_00161204	206879	11290	23	9	9	64079	60479	36.6	0	11	60	0	0	0	0	0	0	0	0	1	7	1	4	8	9	47	0.15	9	0	0	9	1	64079	0	64079	0	1	0.15	virus-like	NA	1	5	2	1	0	Medium-quality	73.8	AAI-based (high-confidence)	NA
Capsule1_18231412	109535	11009	10	3	3	63367	62167	35.18	0	11	63	0	0	0	0	0	0	0	0	1	4	0	6	5	5	52	0.0793651	3	0	0	3	1	63367	0	63367	0	1	0.0793651	virus-like	NA	0	7	1	1	0	Medium-quality	61.39	AAI-based (medium-confidence)	NA
Capsule1_16201713	145563	9871	15	6	6	63261	60861	36.99	0	11	85	0	0	0	0	0	0	0	0	2	15	0	14	17	17	54	0.2	6	0	0	6	1	63261	0	63261	0	1	0.2	virus-like	NA	0	7	3	0	0	High-quality	100	AAI-based (high-confidence)	NA
Capsule1_13192021	358734	7479	4	3	3	64494	63294	43.63	0	11	104	0	0	0	0	0	0	0	0	0	26	4	26	26	30	48	0.288462	2	1	0	3	1	63259	1235	64494	0	1	0.288462	virus-like	NA	0	29	2	4	0	High-quality	100	AAI-based (high-confidence)	high kmer_freq may indicate large duplication
Capsule1_14221706	388863	10960	3	1	1	62542	62142	34.92	0	11	92	0	0	0	0	0	0	0	0	1	16	0	16	17	17	59	0.184783	1	0	0	1	1	62542	0	62542	0	1	0.184783	virus-like	NA	0	5	3	1	0	High-quality	98.76	AAI-based (high-confidence)	NA
Capsule1_09141811	244590	6155	5	1	1	62249	61849	45.74	0	11	83	0	0	0	0	0	0	0	0	0	28	2	15	28	30	38	0.361446	1	0	0	1	1	62249	0	62249	0	1	0.361446	virus-like	NA	0	16	2	0	0	High-quality	100	AAI-based (medium-confidence)	high kmer_freq may indicate large duplication; contig >1.5x longer than expected genome length; low-confidence ITR
Capsule1_23001516	57915	11114	18	7	7	77934	75134	51.85	0	11	102	0	0	0	0	0	0	0	0	1	20	1	14	21	22	66	0.215686	3	4	0	7	1	61717	16217	77934	0	1	0.215686	virus-like	NA	1	10	4	1	1	Medium-quality	80.14	AAI-based (medium-confidence)	NA
Capsule1_11171815	145291	9766	5	3	3	61429	60229	34.2	0	11	81	0	0	0	0	0	0	0	0	0	9	2	6	9	11	64	0.135802	3	0	0	3	1	61429	0	61429	0	1	0.135802	virus-like	NA	0	5	2	0	1	High-quality	94.96	AAI-based (medium-confidence)	NA
Capsule1_09131210	278616	9139	10	4	4	64525	62925	44.28	0	11	86	0	0	0	0	0	0	0	0	1	26	1	13	27	28	45	0.325581	3	1	0	4	1	61391	3134	64525	0	1	0.325581	virus-like	NA	0	10	3	3	0	High-quality	100	AAI-based (high-confidence)	NA
Capsule1_16020915	118098	10493	42	15	14	67453	60853	37.56	0	11	78	0	0	0	0	0	0	0	0	2	11	2	37	13	15	26	0.192308	11	4	0	15	1	61005	6448	67453	0	1	0.192308	virus-like	NA	0	30	4	0	0	Low-quality	38.27	AAI-based (medium-confidence)	NA
Capsule1_08171912	166310	11190	3	3	3	60849	59649	34.42	0	11	94	0	0	0	0	0	0	0	0	1	15	1	17	16	17	60	0.180851	3	0	0	3	1	60849	0	60849	0	1	0.180851	virus-like	NA	0	15	2	1	1	High-quality	97.13	AAI-based (high-confidence)	NA
Capsule1_00142315	185006	12508	55	18	18	76042	68842	40.77	0	11	98	0	0	0	0	0	0	0	0	2	23	7	26	25	32	40	0.326531	11	7	0	18	1	60450	10160	70610	0	0.928566	0.35165	virus-like	NA	0	20	4	1	0	Low-quality	40.21	AAI-based (high-confidence)	NA
Capsule1_06020420	191534	11049	3	2	2	60180	59380	34.87	0	11	89	0	0	0	0	0	0	0	0	2	13	0	16	15	15	58	0.168539	2	0	0	2	1	60180	0	60180	0	1	0.168539	virus-like	NA	0	6	3	1	0	High-quality	95.72	AAI-based (high-confidence)	NA
Capsule1_14051106	102019	9466	22	10	10	74989	70989	34.92	0	11	116	0	0	0	0	0	0	0	0	2	19	1	6	21	22	88	0.189655	6	3	1	9	0.9	60017	13879	73896	1093	0.985425	0.19246	virus-like	NA	0	7	2	0	2	High-quality	100	AAI-based (high-confidence)	NA
Capsule1_10022110	339715	10831	1	1	1	59650	59250	35.14	0	11	96	0	0	0	0	0	0	0	0	1	15	0	18	16	16	62	0.166667	1	0	0	1	1	59650	0	59650	0	1	0.166667	virus-like	NA	0	7	3	1	0	Complete	100	DTR (high-confidence)	NA
Capsule1_07132218	235956	10926	8	4	4	59326	57726	44.8	0	11	73	0	0	0	0	0	0	0	0	1	19	1	5	20	21	47	0.287671	4	0	0	4	1	59326	0	59326	0	1	0.287671	virus-like	NA	1	3	2	3	0	High-quality	96.65	AAI-based (high-confidence)	NA
Capsule1_06051011	223880	10712	38	12	12	68791	63991	44.09	0	11	70	0	0	0	0	0	0	0	0	2	8	2	35	10	12	23	0.171429	7	5	0	12	1	59293	9498	68791	0	1	0.171429	virus-like	NA	0	26	5	0	1	Low-quality	38.94	AAI-based (high-confidence)	NA
Capsule1_03021809	260576	9068	15	11	11	63088	58688	35.67	0	11	104	0	0	0	0	0	0	0	0	1	19	0	12	20	20	72	0.192308	9	2	0	11	1	58944	4144	63088	0	1	0.192308	virus-like	NA	0	10	2	1	0	High-quality	100	AAI-based (high-confidence)	NA
Capsule1_03050720	266623	10394	5	4	4	60305	58705	35.45	0	11	86	0	0	0	0	0	0	0	0	1	15	1	11	16	17	58	0.197674	3	1	0	4	1	58788	1517	60305	0	1	0.197674	virus-like	NA	0	7	3	1	0	High-quality	96.1	AAI-based (medium-confidence)	NA
Capsule1_23221810	284235	10410	5	1	1	58698	58298	35.31	0	11	83	0	0	0	0	0	0	0	0	1	16	0	13	17	17	53	0.204819	1	0	0	1	1	58698	0	58698	0	1	0.204819	virus-like	NA	0	8	2	1	0	High-quality	93.52	AAI-based (high-confidence)	NA
Capsule1_03180806	115011	9863	4	2	2	58463	57663	36.13	0	11	72	0	0	0	0	0	0	0	0	0	13	3	8	13	16	48	0.222222	2	0	0	2	1	58463	0	58463	0	1	0.222222	virus-like	NA	1	7	3	0	2	High-quality	93.07	AAI-based (medium-confidence)	NA
Capsule1_12140818	356819	10423	14	4	4	58381	56781	46.87	0	11	69	0	0	0	0	0	0	0	0	0	12	1	4	12	13	52	0.188406	4	0	0	4	1	58381	0	58381	0	1	0.188406	virus-like	NA	1	5	1	1	0	High-quality	96.37	AAI-based (high-confidence)	NA
Capsule1_08051701	82948	9917	7	4	4	58257	56657	33.02	0	11	68	0	0	0	0	0	0	0	0	0	11	1	5	11	12	51	0.176471	4	0	0	4	1	58257	0	58257	0	1	0.176471	virus-like	NA	0	6	1	1	0	High-quality	93.99	AAI-based (high-confidence)	NA
Capsule1_16161203	154367	9812	3	2	2	58257	57457	35.1	0	11	84	0	0	0	0	0	0	0	0	1	17	0	17	18	18	49	0.214286	2	0	0	2	1	58257	0	58257	0	1	0.214286	virus-like	NA	0	7	3	1	0	High-quality	93.3	AAI-based (high-confidence)	NA
Capsule1_20200913	553487	9925	6	3	3	58014	56814	38.95	0	11	83	0	0	0	0	0	0	0	0	0	9	3	9	9	12	62	0.144578	3	0	0	3	1	58014	0	58014	0	1	0.144578	virus-like	NA	0	7	0	1	0	High-quality	96.21	AAI-based (high-confidence)	NA
Capsule1_18000819	120206	9660	3	1	1	58003	57603	35.54	0	11	75	0	0	0	0	0	0	0	0	0	15	2	9	15	17	49	0.226667	1	0	0	1	1	58003	0	58003	0	1	0.226667	virus-like	NA	1	10	2	0	0	High-quality	95.61	AAI-based (high-confidence)	NA
Capsule1_16111712	63031	9890	3	2	2	57695	56895	36.76	0	11	79	0	0	0	0	0	0	0	0	1	20	2	9	21	23	47	0.291139	2	0	0	2	1	57695	0	57695	0	1	0.291139	virus-like	NA	0	7	0	0	1	High-quality	97.85	AAI-based (high-confidence)	NA
Capsule1_09190723	173152	9308	6	2	2	57643	56843	36.2	0	11	84	0	0	0	0	0	0	0	0	1	15	0	14	16	16	54	0.190476	2	0	0	2	1	57643	0	57643	0	1	0.190476	virus-like	NA	0	4	3	1	0	High-quality	91.91	AAI-based (high-confidence)	NA
Capsule1_16081919	72792	15402	178	34	34	113263	99663	33.12	1.44	11	110	0	0	0	0	0	0	0	0	6	9	23	12	15	38	60	0.345455	16	17	1	33	0.970588	57572	43715	101287	1771	0.894264	0.3863	virus-like	NA	0	3	3	1	0	Low-quality	23.75	AAI-based (high-confidence)	NA
Capsule1_13210118	183876	11184	30	13	13	60620	55420	30.44	0	11	97	0	0	0	0	0	0	0	0	2	20	3	10	22	25	62	0.257732	11	1	1	12	0.923077	57525	1346	58871	1166	0.971148	0.265389	virus-like	NA	0	7	3	0	1	Low-quality	36.24	AAI-based (high-confidence)	NA
Capsule1_06220313	443446	10158	8	4	4	57120	55520	35.23	0	11	86	0	0	0	0	0	0	0	0	1	14	0	8	15	15	63	0.174419	4	0	0	4	1	57120	0	57120	0	1	0.174419	virus-like	NA	0	7	2	1	0	High-quality	91.55	AAI-based (high-confidence)	NA
Capsule1_07070900	166215	9924	5	4	4	57049	55449	34.11	0	11	76	0	0	0	0	0	0	0	0	0	14	0	3	14	14	59	0.184211	4	0	0	4	1	57049	0	57049	0	1	0.184211	virus-like	NA	0	3	1	2	0	Medium-quality	88.73	AAI-based (high-confidence)	NA
Capsule1_13051815	233037	10456	9	5	5	58438	56438	38.29	0	11	56	0	0	0	0	0	0	0	0	0	10	3	4	10	13	39	0.232143	4	1	0	5	1	56907	1531	58438	0	1	0.232143	virus-like	NA	0	6	2	1	1	High-quality	98.01	AAI-based (medium-confidence)	NA
Capsule1_15110913	380319	10351	6	2	2	56684	55884	35.75	0	11	77	0	0	0	0	0	0	0	0	1	15	0	15	16	16	46	0.207792	2	0	0	2	1	56684	0	56684	0	1	0.207792	virus-like	NA	0	10	2	1	0	Medium-quality	89.5	AAI-based (high-confidence)	NA
Capsule1_15022122	329907	10494	7	3	3	59349	58149	37	0	11	85	0	0	0	0	0	0	0	0	2	20	0	9	22	22	54	0.258824	1	2	0	3	1	56654	2695	59349	0	1	0.258824	virus-like	NA	0	7	1	1	0	High-quality	97.34	AAI-based (high-confidence)	NA
Capsule1_01092003	32534	7496	7	4	4	56561	54961	40.93	0	11	86	0	0	0	0	0	0	0	0	0	20	1	16	20	21	49	0.244186	4	0	0	4	1	56561	0	56561	0	1	0.244186	virus-like	NA	0	15	1	0	1	Medium-quality	82.47	AAI-based (medium-confidence)	NA
Capsule1_16202207	159127	10271	4	1	1	56524	56124	46.33	0	11	76	0	0	0	0	0	0	0	0	1	22	0	10	23	23	43	0.302632	1	0	0	1	1	56524	0	56524	0	1	0.302632	virus-like	NA	0	6	2	2	0	High-quality	100	AAI-based (high-confidence)	NA
Capsule1_00201411	260177	10234	6	1	1	56281	55881	35.88	0	11	82	0	0	0	0	0	0	0	0	1	24	3	14	25	28	40	0.341463	1	0	0	1	1	56281	0	56281	0	1	0.341463	virus-like	NA	1	9	2	2	0	High-quality	90.45	AAI-based (high-confidence)	NA
Capsule1_17111503	576427	10171	24	9	9	59154	55554	35.84	0	11	78	0	0	0	0	0	0	0	0	0	21	1	15	21	22	41	0.282051	7	1	1	8	0.888889	56161	1831	57992	1162	0.980356	0.287703	virus-like	NA	0	11	0	1	0	High-quality	100	AAI-based (high-confidence)	NA
Capsule1_17201923	250516	10580	9	3	3	56016	54816	35.87	0	11	79	0	0	0	0	0	0	0	0	2	14	0	11	16	16	52	0.202532	3	0	0	3	1	56016	0	56016	0	1	0.202532	virus-like	NA	0	5	2	1	0	Medium-quality	88.25	AAI-based (high-confidence)	NA
Capsule1_18100317	305381	9745	7	4	4	55952	54352	37.88	0	11	83	0	0	0	0	0	0	0	0	0	17	0	11	17	17	55	0.204819	4	0	0	4	1	55952	0	55952	0	1	0.204819	virus-like	NA	0	6	1	2	0	High-quality	92.78	AAI-based (high-confidence)	NA
Capsule1_05190811	155876	12163	61	22	22	72366	63566	32.03	0	11	97	0	0	0	0	0	0	0	0	2	14	3	18	16	19	60	0.195876	11	10	1	21	0.954545	55682	14634	70316	2050	0.971672	0.201587	virus-like	NA	0	8	1	1	2	Low-quality	43.2	AAI-based (high-confidence)	NA
Capsule1_04191813	276555	10100	9	5	5	55675	53675	38.64	0	11	90	0	0	0	0	0	0	0	0	1	19	0	15	20	20	55	0.222222	5	0	0	5	1	55675	0	55675	0	1	0.222222	virus-like	NA	0	16	0	0	1	Medium-quality	84.19	AAI-based (high-confidence)	NA
Capsule1_11141509	177521	8909	8	6	6	64382	61982	40.73	0	11	89	0	0	0	0	0	0	0	0	0	17	2	18	17	19	52	0.213483	4	2	0	6	1	55657	8725	64382	0	1	0.213483	virus-like	NA	0	16	2	0	1	High-quality	93.82	AAI-based (medium-confidence)	NA
Capsule1_10020312	171946	12593	20	7	7	78940	76140	36.5	0	11	85	0	0	0	0	0	0	0	0	2	14	0	6	16	16	63	0.188235	4	3	0	7	1	55655	23285	78940	0	1	0.188235	virus-like	NA	0	7	4	1	1	Medium-quality	83.9	AAI-based (high-confidence)	NA
Capsule1_00231519	74919	9679	51	17	17	63594	56794	30.8	0	11	88	0	0	0	0	0	0	0	0	4	20	3	8	24	27	53	0.306818	12	3	2	15	0.882353	55532	5032	60564	3030	0.952354	0.322168	virus-like	NA	0	6	2	0	2	Low-quality	37.73	AAI-based (high-confidence)	NA
Capsule1_10030015	70264	8507	16	7	7	56772	53972	41.45	0	11	73	0	0	0	0	0	0	0	0	0	10	1	7	10	11	55	0.150685	6	0	1	6	0.857143	55496	0	55496	1276	0.977524	0.15415	virus-like	NA	0	1	1	0	0	Medium-quality	89.76	AAI-based (high-confidence)	NA
Capsule1_15111723	182312	9312	7	3	3	56673	55473	35.91	0	11	76	0	0	0	0	0	0	0	0	1	23	2	11	24	26	39	0.342105	2	1	0	3	1	55439	1234	56673	0	1	0.342105	virus-like	NA	1	4	3	1	0	High-quality	97.05	AAI-based (high-confidence)	NA
Capsule1_03002218	409705	10102	16	4	4	55357	53757	47.96	0	11	56	0	0	0	0	0	0	0	0	0	4	1	7	4	5	44	0.0892857	4	0	0	4	1	55357	0	55357	0	1	0.0892857	virus-like	NA	0	1	1	0	1	High-quality	91.56	AAI-based (medium-confidence)	NA
Capsule1_04231818	328904	9777	7	4	4	56931	55331	35.59	0	11	78	0	0	0	0	0	0	0	0	1	16	2	4	17	19	55	0.24359	3	1	0	4	1	55313	1618	56931	0	1	0.24359	virus-like	NA	0	6	3	1	1	Medium-quality	88.31	AAI-based (high-confidence)	NA
Capsule1_10071900	150942	8823	5	2	2	55265	54465	35.65	0	11	64	0	0	0	0	0	0	0	0	1	17	1	11	18	19	34	0.296875	2	0	0	2	1	55265	0	55265	0	1	0.296875	virus-like	NA	0	11	2	0	1	Medium-quality	88.29	AAI-based (high-confidence)	NA
Capsule1_16050611	162863	9813	6	1	1	55261	54861	43.17	0	11	60	0	0	0	0	0	0	0	0	1	8	3	6	9	12	42	0.2	1	0	0	1	1	55261	0	55261	0	1	0.2	virus-like	NA	0	3	1	1	0	High-quality	97.15	AAI-based (high-confidence)	NA
Capsule1_12050218	228959	10273	10	3	3	56319	55119	41.38	0	11	85	0	0	0	0	0	0	0	0	1	19	1	15	20	21	49	0.247059	2	1	0	3	1	55034	1285	56319	0	1	0.247059	virus-like	NA	0	14	1	0	1	Medium-quality	82	AAI-based (medium-confidence)	NA
Capsule1_13082011	322761	9759	15	7	7	55904	53104	34.47	0	11	76	0	0	0	0	0	0	0	0	0	17	0	4	17	17	55	0.223684	6	1	0	7	1	54896	1008	55904	0	1	0.223684	virus-like	NA	0	5	2	2	1	Medium-quality	87.09	AAI-based (high-confidence)	NA
Capsule1_02231609	160342	9787	1	1	1	54795	54395	43.24	0	11	74	0	0	0	0	0	0	0	0	1	18	0	7	19	19	48	0.256757	1	0	0	1	1	54795	0	54795	0	1	0.256757	virus-like	NA	0	7	3	1	0	Complete	100	DTR (high-confidence)	NA
Capsule1_12080116	142492	9589	6	4	4	54554	52954	47.88	0	11	57	0	0	0	0	0	0	0	0	0	5	1	7	5	6	44	0.105263	4	0	0	4	1	54554	0	54554	0	1	0.105263	virus-like	NA	0	1	1	0	1	High-quality	90.41	AAI-based (medium-confidence)	NA
Capsule1_21111512	166709	10973	15	9	9	63733	60133	34.19	0	11	97	0	0	0	0	0	0	0	0	1	20	2	7	21	23	67	0.237113	4	5	0	9	1	54520	9213	63733	0	1	0.237113	virus-like	NA	0	4	2	1	2	Medium-quality	74.89	AAI-based (medium-confidence)	NA
Capsule1_12101218	246279	9349	14	5	5	54334	52334	48.32	0	11	83	0	0	0	0	0	0	0	0	4	19	1	9	23	24	50	0.289157	5	0	0	5	1	54334	0	54334	0	1	0.289157	virus-like	NA	0	7	1	2	1	Medium-quality	75.86	HMM-based (lower-bound)	NA
Capsule1_21170703	633728	10063	5	2	2	54271	53471	36.05	0	11	58	0	0	0	0	0	0	0	0	0	12	2	8	12	14	36	0.241379	2	0	0	2	1	54271	0	54271	0	1	0.241379	virus-like	NA	1	7	3	0	1	Medium-quality	86.45	AAI-based (medium-confidence)	NA
Capsule1_12011600	185371	8892	9	3	3	54175	52975	32.29	0	11	75	0	0	0	0	0	0	0	0	0	16	4	15	16	20	40	0.266667	3	0	0	3	1	54175	0	54175	0	1	0.266667	virus-like	NA	1	10	0	0	0	High-quality	91.41	AAI-based (high-confidence)	NA
Capsule1_00170908	103366	9447	4	1	1	54035	53635	44.79	0	11	70	0	0	0	0	0	0	0	0	2	15	2	10	17	19	41	0.271429	1	0	0	1	1	54035	0	54035	0	1	0.271429	virus-like	NA	1	7	2	1	1	High-quality	91.11	AAI-based (high-confidence)	NA
Capsule1_12080413	229922	9722	9	2	2	54006	53206	40.62	0	11	75	0	0	0	0	0	0	0	0	2	16	1	15	18	19	41	0.253333	2	0	0	2	1	54006	0	54006	0	1	0.253333	virus-like	NA	0	8	2	1	1	Medium-quality	89.84	AAI-based (medium-confidence)	NA
Capsule1_15131922	189019	10090	9	2	2	53992	53192	34.75	0	11	70	0	0	0	0	0	0	0	0	2	16	1	14	18	19	37	0.271429	2	0	0	2	1	53992	0	53992	0	1	0.271429	virus-like	NA	0	7	3	1	0	Medium-quality	88.71	AAI-based (high-confidence)	NA
Capsule1_13162106	233845	9383	11	2	2	55152	54352	35.47	0	11	90	0	0	0	0	0	0	0	0	1	13	1	14	14	15	61	0.166667	1	1	0	2	1	53979	1173	55152	0	1	0.166667	virus-like	NA	0	7	2	1	0	High-quality	91.27	AAI-based (high-confidence)	NA
Capsule1_16062103	215980	9613	7	2	2	53923	53123	35.16	0	11	69	0	0	0	0	0	0	0	0	1	12	0	11	13	13	45	0.188406	2	0	0	2	1	53923	0	53923	0	1	0.188406	virus-like	NA	0	6	3	1	0	Medium-quality	86.17	AAI-based (high-confidence)	NA
Capsule1_03230603	469848	9701	10	3	3	53644	52444	39.34	0	11	82	0	0	0	0	0	0	0	0	0	16	1	16	16	17	49	0.207317	3	0	0	3	1	53644	0	53644	0	1	0.207317	virus-like	NA	0	9	0	0	2	High-quality	90.98	AAI-based (high-confidence)	NA
Capsule1_17161811	137465	7720	11	4	4	53525	51925	31.95	0	11	89	0	0	0	0	0	0	0	0	4	21	1	14	25	26	49	0.292135	4	0	0	4	1	53525	0	53525	0	1	0.292135	virus-like	NA	0	7	3	2	0	Medium-quality	86.6	AAI-based (high-confidence)	NA
Capsule1_14200616	127845	8975	7	3	3	54804	53604	36.47	0	11	55	0	0	0	0	0	0	0	0	1	11	5	3	12	17	35	0.309091	2	1	0	3	1	53489	1315	54804	0	1	0.309091	virus-like	NA	0	6	3	1	0	Medium-quality	86.73	AAI-based (medium-confidence)	NA
Capsule1_11012115	129786	9798	7	4	4	53328	51728	34.61	0	11	78	0	0	0	0	0	0	0	0	1	15	0	14	16	16	48	0.205128	4	0	0	4	1	53328	0	53328	0	1	0.205128	virus-like	NA	0	7	2	1	0	High-quality	90.3	AAI-based (high-confidence)	NA
Capsule1_17121106	189204	8199	8	4	4	53058	51458	40.75	0	11	84	0	0	0	0	0	0	0	0	0	19	1	16	19	20	48	0.238095	4	0	0	4	1	53058	0	53058	0	1	0.238095	virus-like	NA	0	13	1	0	1	Medium-quality	79.88	AAI-based (medium-confidence)	NA
Capsule1_12131111	215789	9964	10	4	4	60144	58544	35.32	0	11	72	0	0	0	0	0	0	0	0	1	14	3	5	15	18	49	0.25	2	2	0	4	1	53048	7096	60144	0	1	0.25	virus-like	NA	0	4	1	2	1	High-quality	100	AAI-based (high-confidence)	NA
Capsule1_20051009	306249	9663	5	3	3	54485	53285	36.52	0	11	72	0	0	0	0	0	0	0	0	1	17	0	15	18	18	39	0.25	2	1	0	3	1	53039	1446	54485	0	1	0.25	virus-like	NA	0	6	2	1	0	Medium-quality	86.2	AAI-based (high-confidence)	NA
Capsule1_03010802	23996	6988	11	6	6	53020	50620	34.13	0	11	78	0	0	0	0	0	0	0	0	3	14	1	15	17	18	45	0.230769	6	0	0	6	1	53020	0	53020	0	1	0.230769	virus-like	NA	0	8	1	2	0	Medium-quality	85.25	AAI-based (high-confidence)	NA
Capsule1_12082007	229806	9249	10	3	3	52970	51770	40.25	0	11	79	0	0	0	0	0	0	0	0	0	11	2	24	11	13	42	0.164557	3	0	0	3	1	52970	0	52970	0	1	0.164557	virus-like	NA	1	7	2	3	0	High-quality	96.3	AAI-based (high-confidence)	NA
Capsule1_05140021	465440	10398	10	4	4	54206	52606	48.05	0	11	57	0	0	0	0	0	0	0	0	0	6	1	7	6	7	43	0.122807	3	1	0	4	1	52786	1420	54206	0	1	0.122807	virus-like	NA	0	1	1	0	1	Medium-quality	89.83	AAI-based (medium-confidence)	NA
Capsule1_23232319	163887	9344	2	1	1	52554	52154	36.81	0	11	68	0	0	0	0	0	0	0	0	1	21	2	8	22	24	36	0.352941	1	0	0	1	1	52554	0	52554	0	1	0.352941	virus-like	NA	0	7	0	1	0	Medium-quality	89.04	AAI-based (high-confidence)	NA
Capsule1_01191720	127088	10250	10	6	6	56194	53794	35.51	0	11	72	0	0	0	0	0	0	0	0	1	13	3	5	14	17	50	0.236111	3	3	0	6	1	52543	3651	56194	0	1	0.236111	virus-like	NA	0	6	3	1	1	Medium-quality	86.96	AAI-based (high-confidence)	NA
Capsule1_08172318	291684	9978	1	1	1	52480	52080	46.82	0	11	62	0	0	0	0	0	0	0	0	0	17	3	8	17	20	34	0.322581	1	0	0	1	1	52480	0	52480	0	1	0.322581	virus-like	NA	0	6	3	2	0	Complete	100	DTR (high-confidence)	NA
Capsule1_13220518	147607	7797	28	10	10	53500	49500	45.85	0	11	66	0	0	0	0	0	0	0	0	0	16	1	7	16	17	42	0.257576	9	0	1	9	0.9	52453	0	52453	1047	0.98043	0.262717	virus-like	NA	0	8	2	0	0	High-quality	100	AAI-based (high-confidence)	NA
Capsule1_04051100	309606	9907	8	2	2	52366	51566	39.94	0	11	59	0	0	0	0	0	0	0	0	1	18	1	5	19	20	34	0.338983	2	0	0	2	1	52366	0	52366	0	1	0.338983	virus-like	NA	0	4	3	1	0	Medium-quality	86.2	AAI-based (high-confidence)	NA
Capsule1_02230406	248436	10715	8	5	5	59231	57231	31.37	0	11	70	0	0	0	0	0	0	0	0	0	18	2	6	18	20	44	0.285714	2	3	0	5	1	52325	6906	59231	0	1	0.285714	virus-like	NA	1	7	3	1	0	High-quality	93.94	AAI-based (high-confidence)	NA
Capsule1_05081106	163082	12836	23	14	14	79532	73932	30.26	0	11	86	0	0	0	0	0	0	0	0	0	5	3	5	5	8	73	0.0930233	8	6	0	14	1	52177	27355	79532	0	1	0.0930233	virus-like	NA	0	3	1	0	0	Medium-quality	65.97	AAI-based (high-confidence)	NA
Capsule1_13111422	122991	9442	10	4	4	51976	50376	35.06	0	11	75	0	0	0	0	0	0	0	0	1	10	0	12	11	11	52	0.146667	4	0	0	4	1	51976	0	51976	0	1	0.146667	virus-like	NA	0	7	2	1	0	Medium-quality	83.74	AAI-based (high-confidence)	NA
Capsule1_00191912	168263	9225	8	5	5	51900	49900	37.07	0	11	65	0	0	0	0	0	0	0	0	0	22	1	10	22	23	32	0.353846	5	0	0	5	1	51900	0	51900	0	1	0.353846	virus-like	NA	1	9	2	2	1	Medium-quality	88.15	AAI-based (high-confidence)	NA
Capsule1_03160612	145817	8494	5	4	4	51661	50061	35.91	0	11	65	0	0	0	0	0	0	0	0	0	6	1	18	6	7	40	0.107692	4	0	0	4	1	51661	0	51661	0	1	0.107692	virus-like	NA	0	5	3	0	1	High-quality	93.46	AAI-based (high-confidence)	NA
Capsule1_03051107	457483	10586	6	4	4	54874	53274	44.14	0	11	61	0	0	0	0	0	0	0	0	0	5	0	5	5	5	51	0.0819672	3	1	0	4	1	51652	3222	54874	0	1	0.0819672	virus-like	NA	1	0	1	0	0	Low-quality	48.41	HMM-based (lower-bound)	NA
Capsule1_21170621	236712	9110	10	6	6	51641	49241	49.33	0	11	70	0	0	0	0	0	0	0	0	0	27	1	3	27	28	39	0.4	6	0	0	6	1	51641	0	51641	0	1	0.4	virus-like	NA	0	4	3	2	3	Medium-quality	82.55	AAI-based (high-confidence)	NA
Capsule1_21230218	361982	9211	12	4	4	52861	51261	40.68	0	11	80	0	0	0	0	0	0	0	0	0	14	1	18	14	15	47	0.1875	3	1	0	4	1	51627	1234	52861	0	1	0.1875	virus-like	NA	1	9	2	1	0	Medium-quality	71.66	HMM-based (lower-bound)	NA
Capsule1_10020318	595141	9032	13	4	4	51606	50006	35.36	0	11	81	0	0	0	0	0	0	0	0	2	13	0	16	15	15	50	0.185185	4	0	0	4	1	51606	0	51606	0	1	0.185185	virus-like	NA	0	6	1	1	0	Medium-quality	85.29	AAI-based (high-confidence)	NA
Capsule1_15002110	292470	9119	36	11	11	54123	49723	37.58	0	11	55	0	0	0	0	0	0	0	0	0	9	3	2	9	12	41	0.218182	10	1	0	11	1	51546	2577	54123	0	1	0.218182	virus-like	NA	0	7	2	0	0	High-quality	90.53	AAI-based (medium-confidence)	NA
Capsule1_13022015	212647	9363	8	4	4	53068	51468	49.12	0	11	65	0	0	0	0	0	0	0	0	0	22	3	8	22	25	32	0.384615	3	0	1	3	0.75	51494	0	51494	1574	0.97034	0.396372	virus-like	NA	1	9	0	0	0	Medium-quality	87.45	AAI-based (medium-confidence)	NA
Capsule1_22010115	123366	9497	21	6	6	55834	53434	38.19	0	11	88	0	0	0	0	0	0	0	0	4	10	2	5	14	16	67	0.181818	3	3	0	6	1	51296	4538	55834	0	1	0.181818	virus-like	NA	0	4	3	0	0	Medium-quality	79.52	AAI-based (high-confidence)	NA
Capsule1_05202112	299485	9300	7	2	2	51220	50420	36.35	0	11	76	0	0	0	0	0	0	0	0	1	20	2	8	21	23	45	0.302632	2	0	0	2	1	51220	0	51220	0	1	0.302632	virus-like	NA	0	7	0	0	0	Medium-quality	86.88	AAI-based (high-confidence)	NA
Capsule1_15001504	110418	9972	27	9	9	56398	52798	44.35	0	11	88	0	0	0	0	0	0	0	0	1	20	0	18	21	21	49	0.238636	6	2	1	8	0.888889	51143	4088	55231	1167	0.979308	0.243679	virus-like	NA	0	16	2	2	0	High-quality	96.49	AAI-based (high-confidence)	NA
Capsule1_10082309	268079	8586	12	6	6	51104	48704	38.83	0	11	64	0	0	0	0	0	0	0	0	0	9	1	22	9	10	32	0.15625	6	0	0	6	1	51104	0	51104	0	1	0.15625	virus-like	NA	0	9	1	2	0	High-quality	92.39	AAI-based (high-confidence)	NA
Capsule1_22131111	200263	9198	12	5	5	51102	49102	41.38	0	11	65	0	0	0	0	0	0	0	0	0	16	1	14	16	17	34	0.261538	5	0	0	5	1	51102	0	51102	0	1	0.261538	virus-like	NA	0	13	2	0	1	Medium-quality	74.62	AAI-based (medium-confidence)	NA
Capsule1_20051413	364313	9205	6	2	2	52365	51565	32.86	0	11	81	0	0	0	0	0	0	0	0	1	10	1	17	11	12	52	0.148148	1	0	1	1	0.5	51040	0	51040	1325	0.974697	0.151994	virus-like	NA	0	5	2	1	0	Medium-quality	89.24	AAI-based (high-confidence)	NA
Capsule1_08080223	226376	8530	7	4	4	50843	49243	34.22	0	11	62	0	0	0	0	0	0	0	0	3	11	0	9	14	14	39	0.225806	4	0	0	4	1	50843	0	50843	0	1	0.225806	virus-like	NA	0	6	2	1	0	Medium-quality	80.93	AAI-based (high-confidence)	NA
Capsule1_20041118	368730	8834	27	11	11	54222	49822	45.66	0	11	64	0	0	0	0	0	0	0	0	0	16	0	4	16	16	44	0.25	10	0	1	10	0.909091	50787	0	50787	3435	0.936649	0.266909	virus-like	NA	1	3	2	3	0	Medium-quality	83.16	AAI-based (high-confidence)	NA
Capsule1_06152303	322522	10373	11	3	3	52109	50909	36.85	0	11	90	0	0	0	0	0	0	0	0	0	19	1	7	19	20	63	0.222222	2	1	0	3	1	50565	1544	52109	0	1	0.222222	virus-like	NA	0	11	1	0	0	Medium-quality	82.6	AAI-based (high-confidence)	NA
Capsule1_18172316	114387	8961	9	3	3	52724	51524	35.11	0	11	68	0	0	0	0	0	0	0	0	0	13	3	3	13	16	49	0.235294	2	1	0	3	1	50522	2202	52724	0	1	0.235294	virus-like	NA	0	4	3	1	1	Medium-quality	81.53	AAI-based (high-confidence)	NA
Capsule1_18072204	99554	7855	12	7	7	54822	52022	41.37	0	11	83	0	0	0	0	0	0	0	0	1	22	2	13	23	25	45	0.301205	5	1	1	6	0.857143	50486	3089	53575	1247	0.977254	0.308216	virus-like	NA	1	8	0	0	2	High-quality	91.3	AAI-based (high-confidence)	NA
Capsule1_19232015	183191	9520	14	5	5	51479	49479	41.35	0	11	63	0	0	0	0	0	0	0	0	0	13	1	15	13	14	34	0.222222	4	1	0	5	1	50225	1254	51479	0	1	0.222222	virus-like	NA	0	14	1	0	1	Medium-quality	75.09	AAI-based (medium-confidence)	NA
Capsule1_21070309	490621	7496	11	5	5	50104	48104	35.17	0	11	70	0	0	0	0	0	0	0	0	0	15	0	6	15	15	49	0.214286	5	0	0	5	1	50104	0	50104	0	1	0.214286	virus-like	NA	0	9	0	0	0	Medium-quality	81.54	AAI-based (high-confidence)	NA
Capsule1_23121117	85818	8804	15	6	6	54215	51815	31.98	0	11	71	0	0	0	0	0	0	0	0	1	13	1	2	14	15	54	0.211268	4	2	0	6	1	50076	4139	54215	0	1	0.211268	virus-like	NA	2	4	0	2	0	Medium-quality	77.25	AAI-based (medium-confidence)	NA
Capsule1_01040217	146709	7654	21	12	12	59782	54982	40.9	0	11	87	0	0	0	0	0	0	0	0	0	33	1	12	33	34	41	0.390805	8	4	0	12	1	49702	10080	59782	0	1	0.390805	virus-like	NA	1	11	2	4	1	High-quality	100	AAI-based (high-confidence)	NA
Capsule1_22041717	399865	9453	10	3	3	49641	48441	48.97	0	11	66	0	0	0	0	0	0	0	0	2	17	2	8	19	21	37	0.318182	3	0	0	3	1	49641	0	49641	0	1	0.318182	virus-like	NA	0	5	4	1	0	Medium-quality	82.1	AAI-based (high-confidence)	NA
Capsule1_18011412	117392	9294	29	7	7	50580	47780	55.76	0	11	75	0	0	0	0	0	0	0	0	0	10	1	17	10	11	47	0.146667	6	1	0	7	1	49546	1034	50580	0	1	0.146667	virus-like	NA	1	17	3	0	0	Medium-quality	74.41	AAI-based (high-confidence)	NA
Capsule1_02230221	339017	9452	6	3	3	49536	48336	42.37	0	11	65	0	0	0	0	0	0	0	0	0	7	3	21	7	10	34	0.153846	3	0	0	3	1	49536	0	49536	0	1	0.153846	virus-like	NA	1	13	2	1	0	Medium-quality	89.66	AAI-based (high-confidence)	NA
Capsule1_00010820	229410	9820	18	7	7	52945	50145	35.01	0	11	66	0	0	0	0	0	0	0	0	1	10	1	5	11	12	49	0.181818	5	2	0	7	1	49483	3462	52945	0	1	0.181818	virus-like	NA	0	5	2	0	0	Medium-quality	82.29	AAI-based (high-confidence)	NA
Capsule1_02172014	169409	8838	8	5	5	49470	47470	36.34	0	11	51	0	0	0	0	0	0	0	0	0	9	1	6	9	10	35	0.196078	5	0	0	5	1	49470	0	49470	0	1	0.196078	virus-like	NA	1	7	0	0	1	Medium-quality	80.01	AAI-based (medium-confidence)	NA
Capsule1_07051410	128756	9045	1	1	1	49445	49045	47.56	0	11	70	0	0	0	0	0	0	0	0	2	22	2	10	24	26	34	0.371429	1	0	0	1	1	49445	0	49445	0	1	0.371429	virus-like	NA	1	13	3	1	0	Complete	100	DTR (high-confidence)	NA
Capsule1_08112204	174583	9097	11	4	4	50759	49159	34.26	0	11	80	0	0	0	0	0	0	0	0	2	13	0	17	15	15	48	0.1875	3	0	1	3	0.75	49400	0	49400	1359	0.973226	0.192658	virus-like	NA	0	6	1	0	0	Medium-quality	81.54	AAI-based (high-confidence)	NA
Capsule1_00021503	311728	9621	14	5	5	52619	50619	33.61	0	11	58	0	0	0	0	0	0	0	0	0	11	2	6	11	13	39	0.224138	4	1	0	5	1	49310	3309	52619	0	1	0.224138	virus-like	NA	0	7	2	0	0	Medium-quality	81.46	AAI-based (high-confidence)	NA
Capsule1_02111215	181521	8310	6	2	2	49268	48468	32.14	0	11	79	0	0	0	0	0	0	0	0	1	16	0	14	17	17	48	0.21519	2	0	0	2	1	49268	0	49268	0	1	0.21519	virus-like	NA	0	9	1	0	0	Medium-quality	79.59	AAI-based (high-confidence)	NA
Capsule1_16170121	73960	8791	5	3	3	49107	47907	43.05	0	11	64	0	0	0	0	0	0	0	0	0	11	2	19	11	13	32	0.203125	3	0	0	3	1	49107	0	49107	0	1	0.203125	virus-like	NA	1	15	2	2	0	Medium-quality	89.16	AAI-based (high-confidence)	NA
Capsule1_11172321	194267	8925	4	2	2	48954	48154	37.16	0	11	70	0	0	0	0	0	0	0	0	0	20	5	6	20	25	39	0.357143	2	0	0	2	1	48954	0	48954	0	1	0.357143	virus-like	NA	0	5	3	1	0	Medium-quality	84.27	AAI-based (high-confidence)	NA
Capsule1_16200623	79028	8062	13	6	6	48924	46524	40.46	0	11	61	0	0	0	0	0	0	0	0	1	17	0	9	18	18	34	0.295082	6	0	0	6	1	48924	0	48924	0	1	0.295082	virus-like	NA	0	7	1	2	1	Medium-quality	77.84	AAI-based (high-confidence)	NA
Capsule1_00201804	120042	9004	11	4	4	50484	48884	33.88	0	11	72	0	0	0	0	0	0	0	0	0	16	2	12	16	18	42	0.25	3	1	0	4	1	48890	1594	50484	0	1	0.25	virus-like	NA	1	9	1	0	0	Medium-quality	84.93	AAI-based (high-confidence)	NA
Capsule1_02131400	160883	7932	20	9	9	51427	47827	39.59	0	11	67	0	0	0	0	0	0	0	0	0	24	3	6	24	27	34	0.402985	7	2	0	9	1	48830	2597	51427	0	1	0.402985	virus-like	NA	2	4	1	3	0	Medium-quality	82.3	AAI-based (high-confidence)	NA
Capsule1_21231021	176733	8992	2	1	1	48795	48395	31.69	0	11	78	0	0	0	0	0	0	0	0	1	7	0	23	8	8	47	0.102564	1	0	0	1	1	48795	0	48795	0	1	0.102564	virus-like	NA	0	15	0	0	0	High-quality	90.03	AAI-based (high-confidence)	NA
Capsule1_02140221	142824	8996	8	4	4	56312	54712	32.2	0	11	69	0	0	0	0	0	0	0	0	1	13	1	2	14	15	52	0.217391	2	1	1	3	0.75	48369	6882	55251	1061	0.981159	0.221566	virus-like	NA	2	4	0	2	0	Medium-quality	83.67	AAI-based (medium-confidence)	NA
Capsule1_06010622	180009	9070	2	2	2	48320	47520	47.28	0	11	71	0	0	0	0	0	0	0	0	0	21	1	8	21	22	41	0.309859	2	0	0	2	1	48320	0	48320	0	1	0.309859	virus-like	NA	1	6	3	2	2	High-quality	90.77	AAI-based (high-confidence)	NA
Capsule1_15180918	408916	8670	7	3	3	48320	47120	36.18	0	11	62	0	0	0	0	0	0	0	0	0	8	2	19	8	10	33	0.16129	3	0	0	3	1	48320	0	48320	0	1	0.16129	virus-like	NA	0	11	0	0	1	High-quality	95.25	AAI-based (high-confidence)	NA
Capsule1_22051404	112737	7289	5	4	4	48320	46720	42.37	0	11	66	0	0	0	0	0	0	0	0	2	11	1	6	13	14	46	0.212121	4	0	0	4	1	48320	0	48320	0	1	0.212121	virus-like	NA	0	5	2	0	2	Medium-quality	58.33	HMM-based (lower-bound)	NA
Capsule1_03190707	431736	8112	6	3	3	48215	47015	33.07	0	11	66	0	0	0	0	0	0	0	0	0	8	2	19	8	10	37	0.151515	3	0	0	3	1	48215	0	48215	0	1	0.151515	virus-like	NA	0	7	3	0	0	Medium-quality	87.91	AAI-based (medium-confidence)	NA
Capsule1_14081804	112442	7474	10	6	6	48191	45791	37.11	0	11	48	0	0	0	0	0	0	0	0	0	9	1	2	9	10	36	0.208333	6	0	0	6	1	48191	0	48191	0	1	0.208333	virus-like	NA	0	4	1	0	0	Medium-quality	78.87	AAI-based (high-confidence)	NA
Capsule1_04000613	404921	8813	7	4	4	48131	46531	44.81	0	11	59	0	0	0	0	0	0	0	0	0	6	3	16	6	9	34	0.152542	4	0	0	4	1	48131	0	48131	0	1	0.152542	virus-like	NA	0	6	2	1	0	High-quality	90.18	AAI-based (high-confidence)	NA
Capsule1_14131415	241432	8473	9	2	2	48116	47316	38.26	0	11	66	0	0	0	0	0	0	0	0	0	15	4	6	15	19	41	0.287879	2	0	0	2	1	48116	0	48116	0	1	0.287879	virus-like	NA	1	4	1	0	2	Medium-quality	89.4	AAI-based (high-confidence)	NA
Capsule1_23140822	175961	10458	27	12	12	53363	48563	37.15	0	11	88	0	0	0	0	0	0	0	0	0	11	0	5	11	11	72	0.125	10	2	0	12	1	48100	5263	53363	0	1	0.125	virus-like	NA	2	5	0	0	0	Low-quality	46.52	HMM-based (lower-bound)	NA
Capsule1_07050812	122260	9394	10	3	3	50497	49297	40.82	0	11	80	0	0	0	0	0	0	0	0	0	22	1	10	22	23	47	0.2875	2	1	0	3	1	48000	2497	50497	0	1	0.2875	virus-like	NA	0	12	1	0	0	Medium-quality	73.72	AAI-based (medium-confidence)	NA
Capsule1_00151112	112802	8563	10	3	3	47981	46781	40.89	0	11	64	0	0	0	0	0	0	0	0	1	18	2	11	19	21	32	0.328125	3	0	0	3	1	47981	0	47981	0	1	0.328125	virus-like	NA	1	8	0	0	2	Medium-quality	81.57	AAI-based (high-confidence)	NA
Capsule1_03230908	151399	7443	5	2	2	47899	47099	37.06	0	11	63	0	0	0	0	0	0	0	0	1	10	3	9	11	14	40	0.222222	2	0	0	2	1	47899	0	47899	0	1	0.222222	virus-like	NA	0	14	0	0	0	Medium-quality	82.49	AAI-based (high-confidence)	NA
Capsule1_21100920	389368	8800	11	3	3	47831	46631	34.69	0	11	71	0	0	0	0	0	0	0	0	3	9	0	15	12	12	44	0.169014	3	0	0	3	1	47831	0	47831	0	1	0.169014	virus-like	NA	0	7	2	1	0	Medium-quality	79.18	AAI-based (high-confidence)	NA
Capsule1_20230620	178018	5414	13	4	4	47792	46192	48.05	0	11	60	0	0	0	0	0	0	0	0	0	8	4	7	8	12	41	0.2	4	0	0	4	1	47792	0	47792	0	1	0.2	virus-like	NA	0	6	2	0	0	High-quality	100	AAI-based (high-confidence)	high kmer_freq may indicate large duplication
Capsule1_18140517	145623	9006	10	6	6	50872	48472	43.86	0	11	69	0	0	0	0	0	0	0	0	0	6	1	11	6	7	51	0.101449	5	1	0	6	1	47642	1450	49092	0	0.96501	0.105128	virus-like	NA	0	4	0	0	1	Medium-quality	80.8	AAI-based (high-confidence)	NA
Capsule1_19041813	464710	7756	27	10	10	56346	52346	38.94	0	11	63	0	0	0	0	0	0	0	0	2	7	7	22	9	16	25	0.253968	7	3	0	10	1	47463	8883	56346	0	1	0.253968	virus-like	NA	1	24	1	0	1	Medium-quality	54.19	AAI-based (high-confidence)	NA
Capsule1_21172316	178274	7437	11	6	6	52390	49990	41.02	0	11	89	0	0	0	0	0	0	0	0	0	24	2	16	24	26	47	0.292135	4	1	1	5	0.833333	47363	2258	49621	2769	0.947146	0.308437	virus-like	NA	0	11	0	2	0	High-quality	93.37	AAI-based (medium-confidence)	NA
Capsule1_03232309	365778	8241	22	8	8	50261	47061	33.14	0	11	61	0	0	0	0	0	0	0	0	2	12	2	5	14	16	40	0.262295	6	1	1	7	0.875	47340	1594	48934	1327	0.973598	0.269408	virus-like	NA	0	8	2	1	0	Medium-quality	76.03	AAI-based (medium-confidence)	NA
Capsule1_23110703	336766	8655	13	3	3	49191	47991	35.62	0	11	46	0	0	0	0	0	0	0	0	0	6	1	3	6	7	36	0.152174	2	1	0	3	1	47276	1915	49191	0	1	0.152174	virus-like	NA	0	5	0	0	0	Medium-quality	77.16	AAI-based (high-confidence)	NA
Capsule1_16072200	98387	8496	19	7	7	47183	44383	41.9	0	11	47	0	0	0	0	0	0	0	0	0	8	2	5	8	10	32	0.212766	7	0	0	7	1	47183	0	47183	0	1	0.212766	virus-like	NA	0	1	0	0	1	Medium-quality	75.55	AAI-based (high-confidence)	NA
Capsule1_18101803	320141	9102	7	3	3	47145	45945	35.64	0	11	77	0	0	0	0	0	0	0	0	1	12	1	9	13	14	54	0.181818	3	0	0	3	1	47145	0	47145	0	1	0.181818	virus-like	NA	0	7	1	1	0	Medium-quality	76.16	AAI-based (high-confidence)	NA
Capsule1_23070615	224087	8290	4	2	2	47144	46344	41.73	0	11	68	0	0	0	0	0	0	0	0	1	18	2	13	19	21	34	0.308824	2	0	0	2	1	47144	0	47144	0	1	0.308824	virus-like	NA	0	13	0	1	0	Medium-quality	88.03	AAI-based (medium-confidence)	NA
Capsule1_05050817	289407	7681	9	5	5	48315	46315	34.86	0	11	67	0	0	0	0	0	0	0	0	1	8	0	9	9	9	49	0.134328	4	0	1	4	0.8	47123	0	47123	1192	0.975329	0.137726	virus-like	NA	0	3	1	1	0	Medium-quality	74.85	AAI-based (high-confidence)	NA
Capsule1_16050905	132291	8894	10	7	7	51717	48917	47.59	0	11	68	0	0	0	0	0	0	0	0	0	16	1	9	16	17	42	0.25	5	2	0	7	1	47071	4646	51717	0	1	0.25	virus-like	NA	0	9	1	1	0	High-quality	90.15	AAI-based (high-confidence)	NA
Capsule1_20150611	375491	8881	11	4	4	49696	48096	36.39	0	11	69	0	0	0	0	0	0	0	0	1	14	0	9	15	15	45	0.217391	2	2	0	4	1	47062	2634	49696	0	1	0.217391	virus-like	NA	0	6	1	1	0	Medium-quality	78.99	AAI-based (high-confidence)	NA
Capsule1_16172204	43594	7785	8	5	5	46984	44984	43.39	0	11	65	0	0	0	0	0	0	0	0	0	9	2	19	9	11	35	0.169231	5	0	0	5	1	46984	0	46984	0	1	0.169231	virus-like	NA	1	12	2	2	0	Medium-quality	85.53	AAI-based (high-confidence)	NA
Capsule1_01071806	172665	7106	7	3	3	46955	45755	41.97	0	11	58	0	0	0	0	0	0	0	0	0	17	1	17	17	18	23	0.310345	3	0	0	3	1	46955	0	46955	0	1	0.310345	virus-like	NA	2	9	0	0	0	Medium-quality	79.79	AAI-based (high-confidence)	NA
Capsule1_05170021	189129	8502	3	1	1	46877	46477	33.11	0	11	72	0	0	0	0	0	0	0	0	0	10	0	20	10	10	42	0.138889	1	0	0	1	1	46877	0	46877	0	1	0.138889	virus-like	NA	0	5	2	0	0	Medium-quality	83.72	AAI-based (high-confidence)	NA
Capsule1_08080623	237692	8946	8	3	3	51662	50462	53.24	0	11	72	0	0	0	0	0	0	0	0	1	15	1	7	16	17	48	0.236111	2	1	0	3	1	46779	4883	51662	0	1	0.236111	virus-like	NA	0	7	1	3	1	High-quality	90.46	AAI-based (high-confidence)	NA
Capsule1_00080603	496873	6070	5	2	2	46746	45946	47.96	0	11	78	0	0	0	0	0	0	0	0	0	23	0	8	23	23	47	0.294872	2	0	0	2	1	46746	0	46746	0	1	0.294872	virus-like	NA	2	11	2	0	0	High-quality	100	AAI-based (high-confidence)	NA
Capsule1_05232006	324418	8149	15	3	3	46706	45506	46.9	0	11	49	0	0	0	0	0	0	0	0	0	7	1	4	7	8	37	0.163265	3	0	0	3	1	46706	0	46706	0	1	0.163265	virus-like	NA	1	2	1	1	0	Medium-quality	77.12	AAI-based (medium-confidence)	NA
Capsule1_09192212	235062	8836	16	5	5	47948	45948	36.29	0	11	65	0	0	0	0	0	0	0	0	0	18	1	5	18	19	41	0.292308	4	1	0	5	1	46702	1246	47948	0	1	0.292308	virus-like	NA	0	6	1	1	0	Medium-quality	82.05	AAI-based (high-confidence)	NA
Capsule1_13201105	179568	9697	19	7	7	50753	47953	56.86	0	11	100	0	0	0	0	0	0	0	0	0	19	0	3	19	19	78	0.19	5	2	0	7	1	46669	4084	50753	0	1	0.19	virus-like	NA	0	3	1	3	1	Medium-quality	81.75	AAI-based (medium-confidence)	NA
Capsule1_17212009	274821	9080	13	5	5	46669	44669	41.25	0	11	65	0	0	0	0	0	0	0	0	0	11	3	17	11	14	34	0.215385	5	0	0	5	1	46669	0	46669	0	1	0.215385	virus-like	NA	1	15	3	1	1	Medium-quality	84.57	AAI-based (high-confidence)	NA
Capsule1_12111022	125875	9321	8	5	5	50234	48234	40.81	0	11	65	0	0	0	0	0	0	0	0	0	12	2	16	12	14	35	0.215385	3	2	0	5	1	46656	3578	50234	0	1	0.215385	virus-like	NA	1	9	1	1	0	High-quality	90.81	AAI-based (high-confidence)	NA
Capsule1_12080005	91949	8662	11	6	6	47751	45351	36.2	0	11	74	0	0	0	0	0	0	0	0	0	5	0	18	5	5	51	0.0675676	5	0	1	5	0.833333	46654	0	46654	1097	0.977027	0.0691563	virus-like	NA	0	10	0	0	0	High-quality	90.04	AAI-based (high-confidence)	NA
Capsule1_09111606	221108	7141	9	3	3	46532	45332	33.65	0	11	75	0	0	0	0	0	0	0	0	0	7	0	20	7	7	48	0.0933333	3	0	0	3	1	46532	0	46532	0	1	0.0933333	virus-like	NA	0	9	2	1	0	Medium-quality	83.43	AAI-based (high-confidence)	NA
Capsule1_11170309	334857	9231	6	2	2	47971	47171	36.4	0	11	76	0	0	0	0	0	0	0	0	2	21	0	18	23	23	35	0.302632	1	1	0	2	1	46460	1511	47971	0	1	0.302632	virus-like	NA	0	18	4	1	1	High-quality	100	AAI-based (high-confidence)	NA
Capsule1_15080804	174660	8067	11	6	6	49788	47388	32.54	0	11	78	0	0	0	0	0	0	0	0	0	10	0	18	10	10	50	0.128205	4	2	0	6	1	46439	3349	49788	0	1	0.128205	virus-like	NA	0	7	2	0	0	Medium-quality	89.25	AAI-based (high-confidence)	NA
Capsule1_14191210	178033	8186	22	10	10	58649	54649	33.65	0	11	65	0	0	0	0	0	0	0	0	0	17	0	14	17	17	34	0.261538	6	4	0	10	1	46427	12222	58649	0	1	0.261538	virus-like	NA	0	8	2	0	0	High-quality	90.89	AAI-based (high-confidence)	NA
Capsule1_13222223	199260	8451	12	4	4	46379	44779	35.53	0	11	79	0	0	0	0	0	0	0	0	1	11	1	18	12	13	48	0.164557	4	0	0	4	1	46379	0	46379	0	1	0.164557	virus-like	NA	0	7	2	1	0	Medium-quality	76.75	AAI-based (high-confidence)	NA
Capsule1_05111214	141208	8495	11	4	4	46360	44760	37.67	0	11	56	0	0	0	0	0	0	0	0	0	7	2	6	7	9	41	0.160714	4	0	0	4	1	46360	0	46360	0	1	0.160714	virus-like	NA	0	4	0	1	1	Medium-quality	76.93	AAI-based (high-confidence)	NA
Capsule1_11170819	159838	8856	17	6	6	48477	46077	38.69	0	11	63	0	0	0	0	0	0	0	0	0	8	2	17	8	10	36	0.15873	5	1	0	6	1	46288	2189	48477	0	1	0.15873	virus-like	NA	1	11	2	1	0	Medium-quality	89.58	AAI-based (high-confidence)	NA
Capsule1_21080020	214568	8674	15	5	5	49695	47695	35.79	0	11	61	0	0	0	0	0	0	0	0	1	9	2	1	10	12	48	0.196721	3	2	0	5	1	46274	3421	49695	0	1	0.196721	virus-like	NA	0	2	1	0	1	Medium-quality	82.61	AAI-based (high-confidence)	NA
Capsule1_03052215	246571	9326	13	6	6	52657	50257	41.03	0	11	76	0	0	0	0	0	0	0	0	0	18	1	14	18	19	43	0.25	5	1	0	6	1	46254	6403	52657	0	1	0.25	virus-like	NA	0	15	0	0	1	Medium-quality	76.99	AAI-based (high-confidence)	NA
Capsule1_04221303	343426	8547	9	5	5	46223	44223	36.4	0	11	67	0	0	0	0	0	0	0	0	1	13	0	11	14	14	42	0.208955	5	0	0	5	1	46223	0	46223	0	1	0.208955	virus-like	NA	0	5	3	1	0	Medium-quality	73.4	AAI-based (high-confidence)	NA
Capsule1_10030006	127888	9019	6	2	2	47496	46696	37.86	0	11	62	0	0	0	0	0	0	0	0	1	6	2	12	7	9	41	0.145161	1	1	0	2	1	46141	1355	47496	0	1	0.145161	virus-like	NA	0	7	3	0	0	Medium-quality	83.44	AAI-based (high-confidence)	NA
Capsule1_23221510	201241	8948	25	7	7	46137	43337	39.01	0	11	53	0	0	0	0	0	0	0	0	0	13	1	8	13	14	31	0.264151	7	0	0	7	1	46137	0	46137	0	1	0.264151	virus-like	NA	1	4	2	1	0	Medium-quality	74.58	AAI-based (high-confidence)	NA
Capsule1_05112210	152743	5875	10	5	5	46050	44050	33.68	0	11	67	0	0	0	0	0	0	0	0	0	14	1	9	14	15	43	0.223881	5	0	0	5	1	46050	0	46050	0	1	0.223881	virus-like	NA	0	7	1	0	2	High-quality	100	AAI-based (high-confidence)	high kmer_freq may indicate large duplication
Capsule1_06142208	140477	8004	6	1	1	45905	45505	41.44	0	11	56	0	0	0	0	0	0	0	0	1	20	1	9	21	22	25	0.392857	1	0	0	1	1	45905	0	45905	0	1	0.392857	virus-like	NA	0	8	0	0	0	Medium-quality	82.2	AAI-based (high-confidence)	NA
Capsule1_04110206	266351	10643	12	6	6	57832	55432	35.55	0	11	88	0	0	0	0	0	0	0	0	8	5	4	4	13	17	67	0.193182	3	3	0	6	1	45887	11945	57832	0	1	0.193182	virus-like	NA	0	4	0	0	1	High-quality	92.62	AAI-based (high-confidence)	NA
Capsule1_09170218	225552	7573	9	4	4	48152	46552	30.66	0	11	83	0	0	0	0	0	0	0	0	0	5	0	20	5	5	58	0.060241	3	1	0	4	1	45858	2294	48152	0	1	0.060241	virus-like	NA	0	10	0	0	0	Medium-quality	89.2	AAI-based (high-confidence)	NA
Capsule1_22080613	432304	8669	7	3	3	45848	44648	53.7	0	11	80	0	0	0	0	0	0	0	0	2	24	1	8	26	27	45	0.3375	3	0	0	3	1	45848	0	45848	0	1	0.3375	virus-like	NA	1	7	3	1	1	Medium-quality	89.65	AAI-based (medium-confidence)	NA
Capsule1_04060022	235510	8662	1	1	1	45704	45304	43.56	0	11	67	0	0	0	0	0	0	0	0	0	17	3	18	17	20	29	0.298507	1	0	0	1	1	45704	0	45704	0	1	0.298507	virus-like	NA	0	16	1	2	0	High-quality	100	AAI-based (high-confidence)	NA
Capsule1_16231618	72657	6824	25	8	8	47924	44724	35.75	0	11	71	0	0	0	0	0	0	0	0	1	8	1	7	9	10	54	0.140845	6	2	0	8	1	45680	2244	47924	0	1	0.140845	virus-like	NA	0	5	1	0	1	Medium-quality	74.36	AAI-based (high-confidence)	NA
Capsule1_08031812	116641	7934	14	3	3	45676	44476	34.74	0	11	63	0	0	0	0	0	0	0	0	1	12	0	12	13	13	38	0.206349	3	0	0	3	1	45676	0	45676	0	1	0.206349	virus-like	NA	0	7	3	1	0	Medium-quality	72.82	AAI-based (high-confidence)	NA
Capsule1_06051921	434090	8599	9	3	3	45630	44430	43.77	0	11	75	0	0	0	0	0	0	0	0	0	19	1	20	19	20	35	0.266667	3	0	0	3	1	45630	0	45630	0	1	0.266667	virus-like	NA	0	19	0	3	0	High-quality	100	AAI-based (high-confidence)	NA
Capsule1_09200314	205470	8982	6	3	3	48183	46983	49.45	0	11	54	0	0	0	0	0	0	0	0	0	15	3	6	15	18	30	0.333333	3	0	0	3	1	45611	0	45611	0	0.94662	0.35213	virus-like	NA	0	9	0	0	0	Medium-quality	77.46	AAI-based (medium-confidence)	NA
Capsule1_16062120	186931	8880	3	1	1	45611	45211	45.79	0	11	66	0	0	0	0	0	0	0	0	0	16	3	21	16	19	26	0.287879	1	0	0	1	1	45611	0	45611	0	1	0.287879	virus-like	NA	0	16	2	1	1	High-quality	99.79	AAI-based (high-confidence)	NA
Capsule1_19060220	190538	9050	51	11	11	60671	56271	32.42	0	11	78	0	0	0	0	0	0	0	0	4	20	9	9	24	33	36	0.423077	6	5	0	11	1	45437	15234	60671	0	1	0.423077	virus-like	NA	1	7	2	2	1	Low-quality	45.87	AAI-based (medium-confidence)	NA
Capsule1_00232007	276823	9011	15	7	7	49197	46397	34.48	0	11	65	0	0	0	0	0	0	0	0	0	9	5	2	9	14	49	0.215385	4	3	0	7	1	45414	3783	49197	0	1	0.215385	virus-like	NA	0	5	2	1	0	Medium-quality	76	AAI-based (medium-confidence)	NA
Capsule1_18132120	83480	8168	8	5	5	45404	43404	31.35	0	11	71	0	0	0	0	0	0	0	0	0	5	0	20	5	5	46	0.0704225	5	0	0	5	1	45404	0	45404	0	1	0.0704225	virus-like	NA	0	12	0	0	0	Medium-quality	84.13	AAI-based (high-confidence)	NA
Capsule1_02081403	322200	8343	6	3	3	45297	44097	35.96	0	11	70	0	0	0	0	0	0	0	0	1	8	1	9	9	10	51	0.142857	3	0	0	3	1	45297	0	45297	0	1	0.142857	virus-like	NA	0	8	2	1	0	Medium-quality	73.23	AAI-based (high-confidence)	NA
Capsule1_10131204	105537	8294	14	3	3	45280	44080	33.8	0	11	51	0	0	0	0	0	0	0	0	0	17	3	4	17	20	27	0.392157	3	0	0	3	1	45280	0	45280	0	1	0.392157	virus-like	NA	0	4	3	0	1	Medium-quality	70.21	AAI-based (high-confidence)	NA
Capsule1_18010006	255411	7324	6	4	4	45180	43580	45.96	0	11	58	0	0	0	0	0	0	0	0	1	7	1	25	8	9	24	0.155172	4	0	0	4	1	45180	0	45180	0	1	0.155172	virus-like	NA	0	17	0	1	1	High-quality	100	AAI-based (high-confidence)	NA
Capsule1_10060415	157753	8194	12	4	4	45133	43533	35.07	0	11	49	0	0	0	0	0	0	0	0	0	10	0	7	10	10	32	0.204082	4	0	0	4	1	45133	0	45133	0	1	0.204082	virus-like	NA	0	6	0	0	0	Medium-quality	71.66	AAI-based (medium-confidence)	NA
Capsule1_02110019	283782	9371	9	6	6	50191	47791	34.59	0	11	66	0	0	0	0	0	0	0	0	0	13	0	0	13	13	53	0.19697	4	2	0	6	1	45122	5069	50191	0	1	0.19697	virus-like	NA	0	5	0	2	0	Medium-quality	78.17	AAI-based (high-confidence)	NA
Capsule1_21051523	218980	8615	19	8	8	46224	43024	37.57	0	11	55	0	0	0	0	0	0	0	0	0	4	3	15	4	7	33	0.127273	7	1	0	8	1	45098	1126	46224	0	1	0.127273	virus-like	NA	0	7	2	2	0	Medium-quality	86.79	AAI-based (high-confidence)	NA
Capsule1_19022109	342415	8384	3	2	2	45026	44226	45.61	0	11	62	0	0	0	0	0	0	0	0	0	16	3	21	16	19	22	0.306452	2	0	0	2	1	45026	0	45026	0	1	0.306452	virus-like	NA	0	15	2	1	1	High-quality	99.07	AAI-based (high-confidence)	NA
Capsule1_16142104	37512	7704	7	2	2	45005	44205	36.47	0	11	53	0	0	0	0	0	0	0	0	0	8	4	9	8	12	32	0.226415	2	0	0	2	1	45005	0	45005	0	1	0.226415	virus-like	NA	0	6	2	2	1	Medium-quality	69.87	AAI-based (high-confidence)	NA
Capsule1_18082014	217373	8861	15	4	4	47261	45661	34.53	0	11	67	0	0	0	0	0	0	0	0	1	15	0	11	16	16	40	0.238806	3	1	0	4	1	44892	2369	47261	0	1	0.238806	virus-like	NA	0	5	3	1	0	Medium-quality	75.56	AAI-based (high-confidence)	NA
Capsule1_06110907	439801	8956	18	8	8	54982	51782	38.5	0	11	49	0	0	0	0	0	0	0	0	0	8	4	4	8	12	33	0.244898	5	3	0	8	1	44766	10216	54982	0	1	0.244898	virus-like	NA	0	8	1	1	0	High-quality	91.63	AAI-based (medium-confidence)	NA
Capsule1_02012109	274840	11366	12	5	5	63209	61209	47.7	0	11	100	0	0	0	0	0	0	0	0	3	19	0	6	22	22	72	0.22	2	3	0	5	1	44697	18512	63209	0	1	0.22	virus-like	NA	0	8	0	2	0	High-quality	91.92	AAI-based (medium-confidence)	NA
Capsule1_09051518	432841	8526	5	4	4	44644	43044	45.61	0	11	68	0	0	0	0	0	0	0	0	0	16	2	21	16	18	29	0.264706	4	0	0	4	1	44644	0	44644	0	1	0.264706	virus-like	NA	0	16	2	1	1	Medium-quality	55.43	HMM-based (lower-bound)	NA
Capsule1_07232208	64933	7179	9	5	5	44632	42632	39.14	0	11	55	0	0	0	0	0	0	0	0	0	8	2	14	8	10	31	0.181818	5	0	0	5	1	44632	0	44632	0	1	0.181818	virus-like	NA	1	6	3	2	0	Medium-quality	81.33	AAI-based (high-confidence)	NA
Capsule1_04110821	300832	8389	9	5	5	44561	42561	40.02	0	11	74	0	0	0	0	0	0	0	0	0	16	1	19	16	17	38	0.22973	5	0	0	5	1	44561	0	44561	0	1	0.22973	virus-like	NA	0	16	0	1	1	High-quality	98.78	AAI-based (high-confidence)	NA
Capsule1_13050209	356359	9940	13	7	7	60159	57359	62.85	0	11	100	0	0	0	0	0	0	0	0	1	24	2	4	25	27	69	0.27	3	3	1	6	0.857143	44430	14190	58620	1539	0.974418	0.277089	virus-like	NA	0	6	2	1	2	Low-quality	41.38	HMM-based (lower-bound)	NA
Capsule1_12111112	132484	7038	16	8	8	45451	42251	40.96	0	11	69	0	0	0	0	0	0	0	0	0	16	0	5	16	16	48	0.231884	7	1	0	8	1	44365	1086	45451	0	1	0.231884	virus-like	NA	0	8	1	0	0	Medium-quality	80.39	AAI-based (high-confidence)	NA
Capsule1_15000806	198309	7599	31	11	11	50319	45919	35.89	0	11	81	0	0	0	0	0	0	0	0	0	9	0	5	9	9	67	0.111111	7	4	0	11	1	44284	6035	50319	0	1	0.111111	virus-like	NA	3	2	0	1	0	Medium-quality	83.68	AAI-based (medium-confidence)	NA
Capsule1_00202103	233921	8381	7	1	1	44273	43873	55.95	0	11	69	0	0	0	0	0	0	0	0	1	32	1	1	33	34	34	0.492754	1	0	0	1	1	44273	0	44273	0	1	0.492754	virus-like	NA	0	8	2	0	1	Medium-quality	88.38	AAI-based (high-confidence)	NA
Capsule1_11081918	26513	6329	10	7	6	45223	41823	36.19	0	11	48	0	0	0	0	0	0	0	0	0	13	2	5	13	15	28	0.3125	6	1	0	7	1	44223	1000	45223	0	1	0.3125	virus-like	NA	1	5	2	0	1	Medium-quality	70.65	AAI-based (medium-confidence)	NA
Capsule1_16192112	82429	6871	10	4	4	44178	42578	36.22	0	11	49	0	0	0	0	0	0	0	0	0	9	1	5	9	10	34	0.204082	4	0	0	4	1	44178	0	44178	0	1	0.204082	virus-like	NA	0	6	1	0	0	Medium-quality	69.72	AAI-based (high-confidence)	NA
Capsule1_01081310	171868	7744	6	3	3	44055	42855	37.07	0	11	54	0	0	0	0	0	0	0	0	1	8	0	14	9	9	31	0.166667	3	0	0	3	1	44055	0	44055	0	1	0.166667	virus-like	NA	0	4	2	1	0	Medium-quality	70.98	AAI-based (high-confidence)	NA
Capsule1_10230906	273178	8397	9	2	2	44020	43220	37.06	0	11	66	0	0	0	0	0	0	0	0	0	7	1	17	7	8	41	0.121212	2	0	0	2	1	44020	0	44020	0	1	0.121212	virus-like	NA	0	11	0	0	0	Medium-quality	84.63	AAI-based (high-confidence)	NA
Capsule1_06142314	227769	8313	13	5	5	45431	43431	42.37	0	11	64	0	0	0	0	0	0	0	0	0	9	1	14	9	10	40	0.15625	4	1	0	5	1	43987	1444	45431	0	1	0.15625	virus-like	NA	1	6	3	2	0	Medium-quality	82.46	AAI-based (high-confidence)	NA
Capsule1_10160323	244076	8981	17	9	9	58539	54939	38.42	0	11	91	0	0	0	0	0	0	0	0	2	22	1	20	24	25	46	0.274725	8	1	0	9	1	43973	13580	57553	0	0.983157	0.279432	virus-like	NA	0	13	3	1	0	High-quality	96.13	AAI-based (medium-confidence)	NA
Capsule1_22220621	295245	9170	11	4	4	47185	45585	44.5	0	11	62	0	0	0	0	0	0	0	0	0	2	2	10	2	4	48	0.0645161	2	2	0	4	1	43907	3278	47185	0	1	0.0645161	virus-like	NA	0	2	1	0	0	Medium-quality	78.02	AAI-based (high-confidence)	NA
Capsule1_11231209	538911	8914	11	4	4	48512	46912	46.18	0	11	67	0	0	0	0	0	0	0	0	0	21	2	8	21	23	36	0.343284	3	1	0	4	1	43823	4689	48512	0	1	0.343284	virus-like	NA	0	7	2	1	0	Medium-quality	85.36	AAI-based (high-confidence)	NA
Capsule1_05061813	459373	9352	11	5	5	54627	52627	36.25	0	11	64	0	0	0	0	0	0	0	0	0	11	2	2	11	13	49	0.203125	4	1	0	5	1	43821	10806	54627	0	1	0.203125	virus-like	NA	0	6	3	0	0	Medium-quality	86.04	AAI-based (high-confidence)	NA
Capsule1_20190407	413732	8447	16	5	5	44849	42849	53.66	0	11	52	0	0	0	0	0	0	0	0	0	12	0	2	12	12	38	0.230769	4	1	0	5	1	43722	1127	44849	0	1	0.230769	virus-like	NA	1	3	2	1	0	Medium-quality	67.02	HMM-based (lower-bound)	NA
Capsule1_22101811	244285	8292	22	9	9	47960	44360	33.04	0	11	69	0	0	0	0	0	0	0	0	2	14	0	8	16	16	45	0.231884	6	1	2	7	0.777778	43646	2144	45790	2170	0.954754	0.242873	virus-like	NA	0	5	1	0	0	Medium-quality	73.66	AAI-based (medium-confidence)	NA
Capsule1_03131519	88674	8217	12	4	4	44953	43353	33.65	0	11	51	0	0	0	0	0	0	0	0	0	10	1	9	10	11	31	0.215686	3	1	0	4	1	43507	1446	44953	0	1	0.215686	virus-like	NA	0	9	2	1	0	Medium-quality	69.89	AAI-based (high-confidence)	NA
Capsule1_06111620	198054	7953	10	4	4	43423	41823	40.32	0	11	52	0	0	0	0	0	0	0	0	0	7	2	13	7	9	30	0.173077	4	0	0	4	1	43423	0	43423	0	1	0.173077	virus-like	NA	0	7	0	0	0	Medium-quality	84.1	AAI-based (high-confidence)	NA
Capsule1_06051822	153735	8136	14	4	4	47271	45671	36.35	0	11	57	0	0	0	0	0	0	0	0	0	13	2	7	13	15	35	0.263158	2	2	0	4	1	43396	3875	47271	0	1	0.263158	virus-like	NA	1	6	2	0	1	Medium-quality	75.48	AAI-based (medium-confidence)	NA
Capsule1_00081805	193040	9146	31	13	13	49482	44282	36.92	0	11	51	0	0	0	0	0	0	0	0	0	12	1	5	12	13	33	0.254902	10	3	0	13	1	43381	6101	49482	0	1	0.254902	virus-like	NA	0	4	0	2	1	Medium-quality	81.11	AAI-based (high-confidence)	NA
Capsule1_16221408	43674	7626	13	6	6	44816	42416	36.54	0	11	42	0	0	0	0	0	0	0	0	0	7	2	3	7	9	30	0.214286	5	1	0	6	1	43374	1442	44816	0	1	0.214286	virus-like	NA	0	2	1	0	0	Medium-quality	70.52	AAI-based (high-confidence)	NA
Capsule1_21110506	341204	7879	11	3	3	43285	42085	34.41	0	11	70	0	0	0	0	0	0	0	0	1	16	2	13	17	19	38	0.271429	3	0	0	3	1	43285	0	43285	0	1	0.271429	virus-like	NA	0	5	2	2	0	Medium-quality	71.91	AAI-based (high-confidence)	NA
Capsule1_01050223	221968	8269	14	6	6	48399	45999	36.47	0	11	45	0	0	0	0	0	0	0	0	0	7	5	2	7	12	31	0.266667	4	2	0	6	1	43246	5153	48399	0	1	0.266667	virus-like	NA	0	6	1	0	0	Medium-quality	74.74	AAI-based (medium-confidence)	NA
Capsule1_05041305	277460	8057	16	6	6	48125	45725	44.73	0	11	56	0	0	0	0	0	0	0	0	0	19	3	6	19	22	28	0.392857	5	1	0	6	1	43225	4900	48125	0	1	0.392857	virus-like	NA	0	4	2	2	1	Medium-quality	77.14	AAI-based (high-confidence)	NA
Capsule1_23230813	472979	8348	13	3	3	44833	43633	45.55	0	11	57	0	0	0	0	0	0	0	0	0	15	3	21	15	18	18	0.315789	2	1	0	3	1	43213	1620	44833	0	1	0.315789	virus-like	NA	0	17	2	1	1	High-quality	98.23	AAI-based (high-confidence)	NA
Capsule1_21231420	185547	8630	5	3	3	45499	44299	38	0	11	57	0	0	0	0	0	0	0	0	0	8	0	18	8	8	31	0.140351	2	1	0	3	1	43157	2342	45499	0	1	0.140351	virus-like	NA	0	8	0	0	0	Medium-quality	89.38	AAI-based (high-confidence)	NA
Capsule1_11221219	177861	7790	11	4	4	47208	45608	38.51	0	11	56	0	0	0	0	0	0	0	0	2	13	1	5	15	16	35	0.285714	2	1	1	3	0.75	43127	2216	45343	1865	0.960494	0.297466	virus-like	NA	0	6	0	0	0	Medium-quality	75.27	AAI-based (high-confidence)	NA
Capsule1_02112321	372943	6096	7	4	4	44282	42682	50.48	0	11	56	0	0	0	0	0	0	0	0	0	8	0	7	8	8	41	0.142857	3	1	0	4	1	43115	1167	44282	0	1	0.142857	virus-like	NA	0	13	0	0	0	High-quality	100	AAI-based (high-confidence)	NA
Capsule1_09140607	522967	8765	20	9	9	51600	48000	44.15	0	11	66	0	0	0	0	0	0	0	0	0	24	0	7	24	24	35	0.363636	5	4	0	9	1	43111	8489	51600	0	1	0.363636	virus-like	NA	2	3	2	3	0	Medium-quality	83.31	AAI-based (high-confidence)	NA
Capsule1_12202118	257009	8400	20	6	6	45478	43078	37.3	0	11	38	0	0	0	0	0	0	0	0	0	5	0	4	5	5	29	0.131579	4	1	1	5	0.833333	43077	1151	44228	1250	0.972514	0.135298	virus-like	NA	0	3	0	0	0	Medium-quality	69.27	AAI-based (high-confidence)	NA
Capsule1_20022316	51125	7615	23	8	8	43038	39838	32.8	0	11	54	0	0	0	0	0	0	0	0	0	11	1	6	11	12	36	0.222222	8	0	0	8	1	43038	0	43038	0	1	0.222222	virus-like	NA	1	7	0	0	0	High-quality	100	AAI-based (medium-confidence)	NA
Capsule1_02222111	131022	8502	13	4	4	46994	45394	37.65	0	11	55	0	0	0	0	0	0	0	0	1	12	1	4	13	14	37	0.254545	2	2	0	4	1	42928	4066	46994	0	1	0.254545	virus-like	NA	0	7	2	0	1	Medium-quality	72.95	AAI-based (high-confidence)	NA
Capsule1_05211420	192665	7784	13	4	4	42820	41220	36.15	0	11	51	0	0	0	0	0	0	0	0	0	11	3	12	11	14	25	0.27451	4	0	0	4	1	42820	0	42820	0	1	0.27451	virus-like	NA	0	8	1	0	0	Medium-quality	82.39	AAI-based (high-confidence)	NA
Capsule1_05190221	226865	8459	11	8	8	53034	49834	33.5	0	11	70	0	0	0	0	0	0	0	0	0	5	0	25	5	5	40	0.0714286	4	4	0	8	1	42800	10234	53034	0	1	0.0714286	virus-like	NA	0	6	3	0	0	High-quality	97.24	AAI-based (medium-confidence)	NA
Capsule1_01161721	418769	9669	21	8	8	51078	47878	41.56	0	11	73	0	0	0	0	0	0	0	0	0	22	2	11	22	24	38	0.328767	3	5	0	8	1	42767	8311	51078	0	1	0.328767	virus-like	NA	0	11	0	0	2	Medium-quality	65.73	HMM-based (lower-bound)	NA
Capsule1_18230022	192082	7923	2	1	1	42754	42354	40.04	0	11	61	0	0	0	0	0	0	0	0	0	17	1	14	17	18	29	0.295082	1	0	0	1	1	42754	0	42754	0	1	0.295082	virus-like	NA	0	17	0	2	0	Medium-quality	50.74	HMM-based (lower-bound)	NA
Capsule1_09092003	13980	5022	37	7	7	42691	39891	40.53	0	11	69	0	0	0	0	0	0	0	0	0	14	0	13	14	14	42	0.202899	7	0	0	7	1	42691	0	42691	0	1	0.202899	virus-like	NA	0	13	0	0	1	Medium-quality	64.78	AAI-based (medium-confidence)	NA
Capsule1_19050210	231818	7456	13	7	7	42671	39871	30.84	0	11	52	0	0	0	0	0	0	0	0	0	6	3	0	6	9	43	0.173077	7	0	0	7	1	42671	0	42671	0	1	0.173077	virus-like	NA	0	2	3	0	0	Medium-quality	62.76	AAI-based (high-confidence)	NA
Capsule1_11061918	57089	7634	12	6	5	43590	40590	36.14	0	11	50	0	0	0	0	0	0	0	0	0	11	2	7	11	13	30	0.26	5	1	0	6	1	42590	1000	43590	0	1	0.26	virus-like	NA	1	3	2	0	1	Medium-quality	67.98	AAI-based (medium-confidence)	NA
Capsule1_11071918	55497	7531	13	6	5	43549	40549	36.23	0	11	45	0	0	0	0	0	0	0	0	0	11	2	7	11	13	25	0.288889	5	1	0	6	1	42549	1000	43549	0	1	0.288889	virus-like	NA	1	4	2	0	1	Medium-quality	67.89	AAI-based (medium-confidence)	NA
Capsule1_02141122	291578	6853	10	5	5	42523	40523	37.52	0	11	59	0	0	0	0	0	0	0	0	0	11	1	18	11	12	29	0.20339	5	0	0	5	1	42523	0	42523	0	1	0.20339	virus-like	NA	0	17	3	0	0	Medium-quality	77.57	AAI-based (high-confidence)	NA
Capsule1_14202212	403251	8303	7	2	2	42491	41691	45.71	0	11	59	0	0	0	0	0	0	0	0	0	15	3	19	15	18	22	0.305085	2	0	0	2	1	42491	0	42491	0	1	0.305085	virus-like	NA	0	14	2	1	1	Medium-quality	52.74	HMM-based (lower-bound)	NA
Capsule1_09111219	116603	7397	7	5	5	44196	42196	38.11	0	11	62	0	0	0	0	0	0	0	0	1	14	3	3	15	18	41	0.290323	4	0	1	4	0.8	42455	0	42455	1741	0.960607	0.302228	virus-like	NA	0	5	2	1	1	Medium-quality	65.95	AAI-based (high-confidence)	NA
Capsule1_02182003	348181	7254	13	7	7	43998	41198	41.32	0	11	58	0	0	0	0	0	0	0	0	0	6	1	12	6	7	39	0.12069	6	1	0	7	1	42321	1677	43998	0	1	0.12069	virus-like	NA	0	8	0	0	0	Medium-quality	88.19	AAI-based (high-confidence)	NA
Capsule1_01220917	227291	7634	6	2	2	43559	42759	58.69	0	11	48	0	0	0	0	0	0	0	0	1	10	1	5	11	12	31	0.25	1	1	0	2	1	42239	1320	43559	0	1	0.25	virus-like	NA	0	10	2	0	1	Medium-quality	69.25	AAI-based (high-confidence)	NA
Capsule1_04171618	351458	8047	5	3	3	42149	40949	43.65	0	11	58	0	0	0	0	0	0	0	0	0	15	3	17	15	18	23	0.310345	3	0	0	3	1	42149	0	42149	0	1	0.310345	virus-like	NA	0	16	1	2	0	High-quality	93.05	AAI-based (high-confidence)	NA
Capsule1_10141109	179255	8192	7	3	3	44956	43756	38.11	0	11	41	0	0	0	0	0	0	0	0	1	10	0	4	11	11	26	0.268293	2	1	0	3	1	42141	2815	44956	0	1	0.268293	virus-like	NA	0	8	0	0	1	Medium-quality	69.89	AAI-based (medium-confidence)	low-confidence DTR
Capsule1_02081215	114680	6026	18	7	7	42133	39333	39.69	0	11	53	0	0	0	0	0	0	0	0	0	6	1	14	6	7	32	0.132075	7	0	0	7	1	42133	0	42133	0	1	0.132075	virus-like	NA	0	8	1	1	0	Medium-quality	76.22	AAI-based (medium-confidence)	NA
Capsule1_11200421	312393	9329	39	8	8	48099	44899	42.79	0	11	73	0	0	0	0	0	0	0	0	0	13	1	16	13	14	43	0.191781	5	2	1	7	0.875	41937	4832	46769	1330	0.972349	0.197235	virus-like	NA	1	8	3	2	0	Medium-quality	83.96	AAI-based (high-confidence)	NA
Capsule1_03140717	478869	7963	15	8	8	46860	43660	39.75	0	11	62	0	0	0	0	0	0	0	0	0	20	1	14	20	21	27	0.33871	6	2	0	8	1	41902	4958	46860	0	1	0.33871	virus-like	NA	0	8	0	1	1	Medium-quality	79.89	AAI-based (high-confidence)	NA
Capsule1_16130304	41391	6861	21	11	11	47657	43257	33.33	0	11	74	0	0	0	0	0	0	0	0	0	9	0	15	9	9	50	0.121622	9	2	0	11	1	41893	5764	47657	0	1	0.121622	virus-like	NA	0	4	2	1	0	Medium-quality	85.9	AAI-based (high-confidence)	NA
Capsule1_01230003	13034	5221	50	16	16	49812	43412	39.2	0	11	57	0	0	0	0	0	0	0	0	0	6	0	23	6	6	28	0.105263	11	5	0	16	1	41822	7990	49812	0	1	0.105263	virus-like	NA	0	13	2	0	1	Low-quality	28.88	AAI-based (medium-confidence)	NA
Capsule1_06110419	163085	8412	19	5	5	44953	42953	32.88	0	11	43	0	0	0	0	0	0	0	0	0	9	1	4	9	10	29	0.232558	4	1	0	5	1	41771	3182	44953	0	1	0.232558	virus-like	NA	0	6	1	0	0	Medium-quality	71.15	AAI-based (medium-confidence)	NA
Capsule1_14051507	123349	6325	8	5	5	41714	39714	40.06	0	11	63	0	0	0	0	0	0	0	0	0	12	2	14	12	14	35	0.222222	5	0	0	5	1	41714	0	41714	0	1	0.222222	virus-like	NA	0	8	2	0	0	Medium-quality	81.6	AAI-based (high-confidence)	NA
Capsule1_14071020	112711	7421	25	6	6	42756	40356	35.54	0	11	53	0	0	0	0	0	0	0	0	0	11	1	4	11	12	37	0.226415	5	1	0	6	1	41704	1052	42756	0	1	0.226415	virus-like	NA	0	3	1	0	1	Medium-quality	66.47	AAI-based (high-confidence)	NA
Capsule1_02092003	13256	4859	33	9	9	41659	38059	40.61	0	11	63	0	0	0	0	0	0	0	0	0	12	0	14	12	12	37	0.190476	9	0	0	9	1	41659	0	41659	0	1	0.190476	virus-like	NA	0	12	0	0	1	Medium-quality	63.37	AAI-based (medium-confidence)	NA
Capsule1_21042017	264492	7759	13	2	2	41621	40821	46.76	0	11	59	0	0	0	0	0	0	0	0	1	17	0	4	18	18	37	0.305085	2	0	0	2	1	41621	0	41621	0	1	0.305085	virus-like	NA	0	4	1	0	0	Medium-quality	77.99	AAI-based (high-confidence)	NA
Capsule1_04051522	174529	7872	17	3	3	41472	40272	39.4	0	11	59	0	0	0	0	0	0	0	0	0	13	0	6	13	13	40	0.220339	3	0	0	3	1	41472	0	41472	0	1	0.220339	virus-like	NA	0	3	1	2	0	Medium-quality	66.19	AAI-based (medium-confidence)	NA
Capsule1_23091815	164723	7492	8	5	5	41447	39447	45.75	0	11	56	0	0	0	0	0	0	0	0	0	13	3	20	13	16	20	0.285714	5	0	0	5	1	41447	0	41447	0	1	0.285714	virus-like	NA	0	14	2	1	1	Medium-quality	53.29	HMM-based (lower-bound)	NA
Capsule1_01131512	88081	7500	14	7	7	42695	39895	37	0	11	56	0	0	0	0	0	0	0	0	0	7	3	16	7	10	30	0.178571	6	1	0	7	1	41341	1354	42695	0	1	0.178571	virus-like	NA	1	8	3	2	0	Medium-quality	77.93	AAI-based (medium-confidence)	NA
Capsule1_06010022	264418	8022	10	4	4	41329	39729	39.54	0	11	46	0	0	0	0	0	0	0	0	0	12	1	10	12	13	23	0.282609	4	0	0	4	1	41329	0	41329	0	1	0.282609	virus-like	NA	0	7	0	0	1	Medium-quality	70.03	AAI-based (high-confidence)	NA
Capsule1_23050720	99274	7839	6	4	4	44430	42830	34.98	0	11	61	0	0	0	0	0	0	0	0	1	10	0	10	11	11	40	0.180328	3	1	0	4	1	41315	3115	44430	0	1	0.180328	virus-like	NA	0	5	2	1	0	Medium-quality	71.62	AAI-based (high-confidence)	NA
Capsule1_11041103	447794	7859	18	6	6	42345	39945	41.25	0	11	66	0	0	0	0	0	0	0	0	0	8	3	4	8	11	51	0.166667	5	1	0	6	1	41308	1037	42345	0	1	0.166667	virus-like	NA	0	5	2	1	0	Medium-quality	65.84	AAI-based (high-confidence)	NA
Capsule1_16141012	30592	8393	23	8	8	49731	46531	35.81	0	11	75	0	0	0	0	0	0	0	0	1	15	0	7	16	16	52	0.213333	6	2	0	8	1	41261	8470	49731	0	1	0.213333	virus-like	NA	0	6	3	0	0	Medium-quality	79.16	AAI-based (high-confidence)	NA
Capsule1_19170212	89858	7348	14	7	7	42914	40114	34.72	0	11	59	0	0	0	0	0	0	0	0	2	5	1	2	7	8	49	0.135593	6	1	0	7	1	41201	1713	42914	0	1	0.135593	virus-like	NA	0	1	1	1	0	Low-quality	36.17	HMM-based (lower-bound)	NA
Capsule1_21030500	159170	7511	13	4	4	41171	39571	44.89	0	11	45	0	0	0	0	0	0	0	0	0	6	2	14	6	8	23	0.177778	4	0	0	4	1	41171	0	41171	0	1	0.177778	virus-like	NA	1	7	2	2	0	Medium-quality	74.7	AAI-based (high-confidence)	NA
Capsule1_16032312	51054	6649	19	5	5	41140	39140	48.04	0	11	45	0	0	0	0	0	0	0	0	1	4	0	12	5	5	28	0.111111	5	0	0	5	1	41140	0	41140	0	1	0.111111	virus-like	NA	1	6	1	0	0	Medium-quality	51.61	HMM-based (lower-bound)	NA
Capsule1_06230309	237671	8387	7	4	4	44923	43323	41.77	0	11	50	0	0	0	0	0	0	0	0	0	4	1	14	4	5	31	0.1	2	2	0	4	1	40998	3925	44923	0	1	0.1	virus-like	NA	0	7	1	1	0	Medium-quality	77.96	AAI-based (high-confidence)	NA
Capsule1_21051315	258053	7376	6	2	2	42493	41693	44.32	0	11	46	0	0	0	0	0	0	0	0	0	19	0	5	19	19	22	0.413043	1	1	0	2	1	40994	1499	42493	0	1	0.413043	virus-like	NA	0	1	1	2	0	Medium-quality	66.46	AAI-based (high-confidence)	low-confidence ITR
Capsule1_03120212	162479	7427	9	2	2	40784	39984	45.55	0	11	55	0	0	0	0	0	0	0	0	0	5	3	17	5	8	30	0.145455	2	0	0	2	1	40784	0	40784	0	1	0.145455	virus-like	NA	0	7	2	0	0	Medium-quality	51.68	HMM-based (lower-bound)	NA
Capsule1_17172123	236721	8158	8	4	4	43593	41993	42.57	0	11	67	0	0	0	0	0	0	0	0	0	15	2	13	15	17	37	0.253731	3	1	0	4	1	40697	2896	43593	0	1	0.253731	virus-like	NA	0	10	1	1	1	Medium-quality	80.45	AAI-based (medium-confidence)	NA
Capsule1_23232019	120178	6684	10	6	6	42538	40138	32.69	0	11	71	0	0	0	0	0	0	0	0	0	9	0	16	9	9	46	0.126761	5	0	1	5	0.833333	40675	0	40675	1863	0.956204	0.132566	virus-like	NA	0	4	4	1	0	Medium-quality	71.72	AAI-based (high-confidence)	NA
Capsule1_13191700	196491	7372	10	5	5	42332	40332	35.34	0	11	53	0	0	0	0	0	0	0	0	0	6	0	16	6	6	31	0.113208	4	1	0	5	1	40657	1675	42332	0	1	0.113208	virus-like	NA	0	10	0	0	0	Medium-quality	82.18	AAI-based (high-confidence)	NA
Capsule1_21140020	130187	7623	7	1	1	40511	40111	32.77	0	11	42	0	0	0	0	0	0	0	0	1	10	1	3	11	12	27	0.285714	1	0	0	1	1	40511	0	40511	0	1	0.285714	virus-like	NA	2	3	0	1	0	Medium-quality	57.09	AAI-based (medium-confidence)	NA
Capsule1_21022316	73622	7524	18	6	6	43285	40885	36.4	0	11	49	0	0	0	0	0	0	0	0	1	11	3	2	12	15	32	0.306122	5	1	0	6	1	40510	2775	43285	0	1	0.306122	virus-like	NA	0	5	1	0	1	Medium-quality	74.78	AAI-based (high-confidence)	NA
Capsule1_05231204	180434	5899	5	4	4	40419	38819	31.93	0	11	52	0	0	0	0	0	0	0	0	0	14	0	9	14	14	29	0.269231	4	0	0	4	1	40419	0	40419	0	1	0.269231	virus-like	NA	0	8	0	1	0	High-quality	100	AAI-based (high-confidence)	NA
Capsule1_00231612	205868	7064	3	3	3	40165	38965	46.67	0	11	50	0	0	0	0	0	0	0	0	1	12	0	6	13	13	31	0.26	3	0	0	3	1	40165	0	40165	0	1	0.26	virus-like	NA	1	4	1	3	0	High-quality	92.48	AAI-based (medium-confidence)	NA
Capsule1_13231023	80809	8032	17	9	9	51366	47766	67.82	0	11	76	0	0	0	0	0	0	0	0	1	12	2	6	13	15	55	0.197368	4	5	0	9	1	40132	11234	51366	0	1	0.197368	virus-like	NA	0	6	1	0	1	Low-quality	48.9	AAI-based (medium-confidence)	NA
Capsule1_00082103	374348	8375	19	4	4	41291	39691	36.49	0	11	42	0	0	0	0	0	0	0	0	0	7	0	2	7	7	33	0.166667	3	1	0	4	1	40087	1204	41291	0	1	0.166667	virus-like	NA	0	4	0	0	0	Medium-quality	65.61	AAI-based (high-confidence)	NA
Capsule1_06101916	77912	6818	30	9	9	46247	42647	34.3	0	11	58	0	0	0	0	0	0	0	0	0	6	2	7	6	8	43	0.137931	6	3	0	9	1	39949	6298	46247	0	1	0.137931	virus-like	NA	0	7	3	0	0	Medium-quality	70.41	AAI-based (high-confidence)	NA
Capsule1_13221813	363918	7624	9	3	3	39925	38725	35.42	0	11	52	0	0	0	0	0	0	0	0	0	8	1	15	8	9	28	0.173077	3	0	0	3	1	39925	0	39925	0	1	0.173077	virus-like	NA	0	9	0	0	0	Medium-quality	77.7	AAI-based (high-confidence)	NA
Capsule1_20002316	43313	7481	28	10	10	43255	39255	32.82	0	11	58	0	0	0	0	0	0	0	0	0	10	1	7	10	11	40	0.189655	9	1	0	10	1	39919	3336	43255	0	1	0.189655	virus-like	NA	1	7	0	0	0	High-quality	100	AAI-based (medium-confidence)	NA
Capsule1_03052123	240201	7442	11	5	5	41002	39002	45.57	0	11	64	0	0	0	0	0	0	0	0	0	13	2	20	13	15	29	0.234375	4	1	0	5	1	39783	1219	41002	0	1	0.234375	virus-like	NA	0	17	2	0	1	Medium-quality	89.88	AAI-based (high-confidence)	NA
Capsule1_00092003	14724	4962	31	8	8	43451	40251	40.95	0	11	70	0	0	0	0	0	0	0	0	0	17	0	11	17	17	42	0.242857	5	3	0	8	1	39759	3692	43451	0	1	0.242857	virus-like	NA	0	13	1	0	1	Medium-quality	63.57	AAI-based (medium-confidence)	NA
Capsule1_23060719	140003	6767	12	4	4	39734	38134	35.67	0	11	67	0	0	0	0	0	0	0	0	1	9	0	14	10	10	43	0.149254	4	0	0	4	1	39734	0	39734	0	1	0.149254	virus-like	NA	0	6	1	2	0	Medium-quality	65.74	AAI-based (high-confidence)	NA
Capsule1_00161721	446325	8671	16	5	5	44564	42564	43.8	0	11	43	0	0	0	0	0	0	0	0	0	7	1	3	7	8	32	0.186047	4	1	0	5	1	39618	4946	44564	0	1	0.186047	virus-like	NA	0	3	1	0	1	Medium-quality	74.39	AAI-based (high-confidence)	NA
Capsule1_13091212	162201	8168	21	7	7	43865	41065	41.4	0	11	56	0	0	0	0	0	0	0	0	0	8	1	16	8	9	31	0.160714	4	3	0	7	1	39546	4319	43865	0	1	0.160714	virus-like	NA	1	6	3	1	0	Medium-quality	77.58	AAI-based (high-confidence)	NA
Capsule1_01081816	156923	7047	8	6	6	42328	39928	32.16	0	11	66	0	0	0	0	0	0	0	0	0	10	1	13	10	11	42	0.166667	4	1	1	5	0.833333	39516	1348	40864	1464	0.965413	0.172638	virus-like	NA	0	1	2	1	0	Medium-quality	73.12	AAI-based (high-confidence)	NA
Capsule1_04102021	260236	7026	12	4	4	39488	37888	33.9	0	11	49	0	0	0	0	0	0	0	0	0	10	0	9	10	10	30	0.204082	4	0	0	4	1	39488	0	39488	0	1	0.204082	virus-like	NA	0	5	1	1	0	Medium-quality	63.51	AAI-based (high-confidence)	NA
Capsule1_12022012	104105	7659	23	8	8	49234	46034	37.1	0	11	47	0	0	0	0	0	0	0	0	0	6	2	3	6	8	36	0.170213	5	3	0	8	1	39428	9806	49234	0	1	0.170213	virus-like	NA	0	4	1	0	0	Medium-quality	85.56	AAI-based (medium-confidence)	NA
Capsule1_19062316	147390	7110	16	8	8	47459	44259	48.6	0	24	59	0	0	0	0	0	0	0	0	0	15	0	3	15	15	41	0.254237	5	3	0	8	1	39415	8044	47459	0	1	0.254237	virus-like	NA	0	2	1	0	0	Medium-quality	67.44	HMM-based (lower-bound)	low-confidence DTR
Capsule1_18210521	328554	7580	8	5	5	42735	40735	46.75	0	11	70	0	0	0	0	0	0	0	0	0	14	0	26	14	14	30	0.2	4	1	0	5	1	39314	3421	42735	0	1	0.2	virus-like	NA	0	16	2	1	0	High-quality	94.22	AAI-based (high-confidence)	NA
Capsule1_21160312	204451	7463	7	4	4	40351	38751	32.97	0	11	70	0	0	0	0	0	0	0	0	0	9	0	15	9	9	46	0.128571	3	1	0	4	1	39311	1040	40351	0	1	0.128571	virus-like	NA	0	6	2	0	0	Medium-quality	72.12	AAI-based (high-confidence)	NA
Capsule1_22111519	124239	7223	24	10	10	44988	40988	34.09	0	11	76	0	0	0	0	0	0	0	0	2	16	0	12	18	18	46	0.236842	7	2	1	9	0.9	39273	4401	43674	1314	0.970792	0.243968	virus-like	NA	0	6	1	1	2	Medium-quality	71.91	AAI-based (high-confidence)	NA
Capsule1_07021801	41697	6505	20	12	12	44968	40168	36.28	0	11	63	0	0	0	0	0	0	0	0	0	13	2	6	13	15	42	0.238095	9	3	0	12	1	39236	5732	44968	0	1	0.238095	virus-like	NA	1	6	0	0	1	Medium-quality	71.71	AAI-based (medium-confidence)	NA
Capsule1_15200415	201037	7836	9	4	4	39216	37616	45.77	0	11	52	0	0	0	0	0	0	0	0	0	13	3	15	13	16	21	0.307692	4	0	0	4	1	39216	0	39216	0	1	0.307692	virus-like	NA	0	12	2	1	1	Medium-quality	86.97	AAI-based (high-confidence)	NA
Capsule1_22111515	104105	5424	11	5	5	39204	37204	38.7	0	11	50	0	0	0	0	0	0	0	0	0	7	2	12	7	9	29	0.18	5	0	0	5	1	39204	0	39204	0	1	0.18	virus-like	NA	0	7	0	2	0	Medium-quality	70.89	AAI-based (high-confidence)	NA
Capsule1_05050915	75798	12034	90	28	28	86976	75776	36.12	0	11	108	0	0	0	0	0	0	0	0	8	26	3	27	34	37	44	0.342593	14	13	1	27	0.964286	39178	46660	85838	1138	0.986916	0.347135	virus-like	NA	1	18	1	0	0	Low-quality	24.16	AAI-based (medium-confidence)	NA
Capsule1_06201216	162926	8608	10	8	8	52368	49168	33.39	0	11	47	0	0	0	0	0	0	0	0	0	8	2	3	8	10	34	0.212766	4	4	0	8	1	39051	13317	52368	0	1	0.212766	virus-like	NA	0	5	0	0	0	Medium-quality	86.99	AAI-based (high-confidence)	NA
Capsule1_09170317	257864	7514	4	2	2	39017	38217	49.62	0	11	65	0	0	0	0	0	0	0	0	0	10	0	11	10	10	44	0.153846	2	0	0	2	1	39017	0	39017	0	1	0.153846	virus-like	NA	0	6	0	2	2	High-quality	100	AAI-based (high-confidence)	NA
Capsule1_18220316	192338	7337	11	6	6	42426	40026	35.52	0	11	73	0	0	0	0	0	0	0	0	1	11	1	11	12	13	49	0.178082	5	1	0	6	1	38930	3496	42426	0	1	0.178082	virus-like	NA	0	11	1	0	0	Medium-quality	69.63	AAI-based (high-confidence)	NA
Capsule1_15141004	105128	8418	16	5	5	51171	49171	38.7	0	11	86	0	0	0	0	0	0	0	0	0	20	1	17	20	21	48	0.244186	3	2	0	5	1	38902	12269	51171	0	1	0.244186	virus-like	NA	0	14	2	0	1	Medium-quality	77.35	AAI-based (medium-confidence)	NA
Capsule1_15070323	179130	7430	8	5	5	38841	36841	46.8	0	11	62	0	0	0	0	0	0	0	0	0	15	2	24	15	17	21	0.274194	5	0	0	5	1	38841	0	38841	0	1	0.274194	virus-like	NA	0	12	2	1	1	Medium-quality	86.13	AAI-based (high-confidence)	NA
Capsule1_00080021	244911	8079	13	5	5	39974	37974	51.86	0	11	66	0	0	0	0	0	0	0	0	0	13	0	7	13	13	46	0.19697	4	0	1	4	0.8	38839	0	38839	1135	0.971607	0.202726	virus-like	NA	0	6	1	1	1	Medium-quality	53.1	AAI-based (medium-confidence)	NA
Capsule1_09121405	203743	7591	26	7	7	42185	39385	36.71	0	11	57	0	0	0	0	0	0	0	0	0	9	1	7	9	10	40	0.175439	6	1	0	7	1	38835	3350	42185	0	1	0.175439	virus-like	NA	0	4	1	1	0	Medium-quality	65.73	AAI-based (high-confidence)	NA
Capsule1_12110007	444816	10843	21	7	7	55929	53129	49.84	0	11	75	0	0	0	0	0	0	0	0	1	14	1	3	15	16	56	0.213333	3	3	1	6	0.857143	38834	15696	54530	1399	0.974986	0.218807	virus-like	NA	0	1	1	0	2	Medium-quality	81.45	AAI-based (medium-confidence)	NA
Capsule1_00232211	200229	6449	7	4	4	38807	37207	49.66	0	11	41	0	0	0	0	0	0	0	0	0	13	2	6	13	15	20	0.365854	4	0	0	4	1	38807	0	38807	0	1	0.365854	virus-like	NA	1	6	0	0	0	Medium-quality	65.99	AAI-based (high-confidence)	NA
Capsule1_03050614	156794	7658	7	2	2	38725	37925	45.53	0	11	60	0	0	0	0	0	0	0	0	0	13	3	19	13	16	25	0.266667	2	0	0	2	1	38725	0	38725	0	1	0.266667	virus-like	NA	0	15	2	1	1	Medium-quality	84.52	AAI-based (high-confidence)	NA
Capsule1_16051305	69093	6604	20	7	7	43266	40466	36.13	0	11	57	0	0	0	0	0	0	0	0	0	12	1	7	12	13	37	0.22807	6	1	0	7	1	38697	4569	43266	0	1	0.22807	virus-like	NA	0	5	1	3	0	Medium-quality	67.26	AAI-based (high-confidence)	NA
Capsule1_10072123	205216	7499	2	1	1	38633	38233	44.11	0	11	59	0	0	0	0	0	0	0	0	1	12	2	5	13	15	39	0.254237	1	0	0	1	1	38633	0	38633	0	1	0.254237	virus-like	NA	2	7	3	0	0	High-quality	97.68	AAI-based (high-confidence)	NA
Capsule1_13111522	212184	7702	13	4	4	40570	38970	45.53	0	11	62	0	0	0	0	0	0	0	0	0	10	0	21	10	10	31	0.16129	3	1	0	4	1	38596	1974	40570	0	1	0.16129	virus-like	NA	0	17	1	0	0	Medium-quality	89.29	AAI-based (high-confidence)	NA
Capsule1_14202112	90823	6096	21	6	6	38498	36098	32.1	0	11	63	0	0	0	0	0	0	0	0	0	13	1	13	13	14	36	0.222222	6	0	0	6	1	38498	0	38498	0	1	0.222222	virus-like	NA	0	5	2	1	0	Medium-quality	62.5	AAI-based (high-confidence)	NA
Capsule1_05110500	157524	6925	9	5	5	39566	37566	56.88	0	11	64	0	0	0	0	0	0	0	0	0	20	2	10	20	22	32	0.34375	4	1	0	5	1	38487	1079	39566	0	1	0.34375	virus-like	NA	0	7	1	2	1	Medium-quality	78.68	AAI-based (high-confidence)	NA
Capsule1_05212113	331369	7102	9	6	6	38407	36007	33.97	0	11	47	0	0	0	0	0	0	0	0	0	9	0	8	9	9	30	0.191489	6	0	0	6	1	38407	0	38407	0	1	0.191489	virus-like	NA	0	4	3	1	0	Medium-quality	61.52	AAI-based (high-confidence)	NA
Capsule1_00001118	282149	7116	8	5	5	40042	38042	32.91	0	11	58	0	0	0	0	0	0	0	0	0	10	0	13	10	10	35	0.172414	4	0	1	4	0.8	38388	0	38388	1654	0.958693	0.179842	virus-like	NA	0	10	0	0	0	Medium-quality	68.76	AAI-based (high-confidence)	NA
Capsule1_04131207	371438	7307	1	1	1	38323	37923	47.58	0	11	48	0	0	0	0	0	0	0	0	1	8	1	16	9	10	22	0.208333	1	0	0	1	1	38323	0	38323	0	1	0.208333	virus-like	NA	1	6	2	2	1	Medium-quality	69.81	AAI-based (high-confidence)	NA
Capsule1_03140306	125481	7115	24	8	8	41606	38406	40.89	0	11	60	0	0	0	0	0	0	0	0	0	14	2	10	14	16	34	0.266667	6	2	0	8	1	38180	3426	41606	0	1	0.266667	virus-like	NA	0	13	0	0	0	Medium-quality	60.93	AAI-based (medium-confidence)	NA
Capsule1_13162017	166185	6420	21	5	5	38152	36152	40.1	0	11	66	0	0	0	0	0	0	0	0	0	13	2	14	13	15	37	0.227273	5	0	0	5	1	38152	0	38152	0	1	0.227273	virus-like	NA	0	12	1	0	1	Medium-quality	57.82	AAI-based (medium-confidence)	NA
Capsule1_07111421	106228	6350	19	10	10	45131	41131	36.35	0	11	48	0	0	0	0	0	0	0	0	1	12	2	2	13	15	31	0.3125	8	2	0	10	1	38067	7064	45131	0	1	0.3125	virus-like	NA	0	6	2	0	1	Medium-quality	70.12	AAI-based (high-confidence)	NA
Capsule1_18081115	171623	7446	7	3	3	38039	36839	43.53	0	11	72	0	0	0	0	0	0	0	0	0	7	3	15	7	10	47	0.138889	3	0	0	3	1	38039	0	38039	0	1	0.138889	virus-like	NA	1	14	0	0	0	Medium-quality	69.24	AAI-based (high-confidence)	NA
Capsule1_09142312	110159	7173	1	1	1	37966	37566	57.37	0	11	53	0	0	0	0	0	0	0	0	0	13	2	12	13	15	26	0.283019	1	0	0	1	1	37966	0	37966	0	1	0.283019	virus-like	NA	2	7	2	2	1	Complete	100	DTR (high-confidence)	NA
Capsule1_14082315	160031	7449	7	4	4	39331	37731	41.84	0	11	48	0	0	0	0	0	0	0	0	0	7	1	11	7	8	29	0.166667	3	1	0	4	1	37963	1368	39331	0	1	0.166667	virus-like	NA	0	6	0	0	0	Medium-quality	76.17	AAI-based (high-confidence)	NA
Capsule1_05171112	89834	7059	21	5	5	37950	35950	41.09	0	11	62	0	0	0	0	0	0	0	0	0	15	1	13	15	16	33	0.258065	5	0	0	5	1	37950	0	37950	0	1	0.258065	virus-like	NA	1	10	1	0	1	High-quality	93.52	AAI-based (high-confidence)	NA
Capsule1_11050620	201582	7277	3	2	2	37926	37126	34.76	0	11	59	0	0	0	0	0	0	0	0	0	11	1	6	11	12	41	0.20339	2	0	0	2	1	37926	0	37926	0	1	0.20339	virus-like	NA	0	6	2	0	1	High-quality	100	AAI-based (high-confidence)	NA
Capsule1_10142003	441841	9362	18	7	7	50490	47690	34.29	0	11	73	0	0	0	0	0	0	0	0	2	4	0	5	6	6	62	0.0821918	4	3	0	7	1	37911	12579	50490	0	1	0.0821918	virus-like	NA	0	3	1	0	0	Medium-quality	77.46	AAI-based (medium-confidence)	NA
Capsule1_14171212	153346	6659	2	1	1	37859	37459	36.06	0	11	52	0	0	0	0	0	0	0	0	0	8	0	6	8	8	38	0.153846	1	0	0	1	1	37859	0	37859	0	1	0.153846	virus-like	NA	0	3	0	0	0	Complete	100	DTR (high-confidence)	NA
Capsule1_03201211	301125	7475	16	3	3	37813	36613	36.5	0	11	49	0	0	0	0	0	0	0	0	0	8	2	3	8	10	36	0.204082	3	0	0	3	1	37813	0	37813	0	1	0.204082	virus-like	NA	0	4	0	0	0	Medium-quality	64.12	AAI-based (high-confidence)	NA
Capsule1_06230303	629253	8004	14	4	4	41178	39578	36.39	0	11	46	0	0	0	0	0	0	0	0	0	8	1	5	8	9	32	0.195652	2	2	0	4	1	37798	3380	41178	0	1	0.195652	virus-like	NA	0	5	0	0	1	Medium-quality	65.57	AAI-based (medium-confidence)	NA
Capsule1_12101603	279425	7656	17	10	10	40313	36313	41.19	0	11	62	0	0	0	0	0	0	0	0	0	8	1	13	8	9	40	0.145161	8	2	0	10	1	37716	2597	40313	0	1	0.145161	virus-like	NA	1	4	1	2	0	Medium-quality	73.28	AAI-based (high-confidence)	NA
Capsule1_06110521	531582	6693	7	4	4	37687	36087	43.6	0	11	50	0	0	0	0	0	0	0	0	0	13	1	16	13	14	20	0.28	4	0	0	4	1	37687	0	37687	0	1	0.28	virus-like	NA	0	13	0	1	0	Medium-quality	83.17	AAI-based (high-confidence)	NA
Capsule1_06231203	538228	7203	9	6	6	38594	36194	57.42	0	11	61	0	0	0	0	0	0	0	0	1	18	1	10	19	20	31	0.327869	5	1	0	6	1	37578	1016	38594	0	1	0.327869	virus-like	NA	2	13	2	2	0	Medium-quality	69.66	AAI-based (medium-confidence)	NA
Capsule1_05040611	122523	7994	24	9	9	41709	38109	36.13	0	11	60	0	0	0	0	0	0	0	0	1	14	0	9	15	15	36	0.25	6	2	1	8	0.888889	37565	3068	40633	1076	0.974202	0.25662	virus-like	NA	0	7	2	1	0	Medium-quality	66.2	AAI-based (high-confidence)	NA
Capsule1_16141009	189323	7343	5	1	1	37498	37098	43.6	0	11	53	0	0	0	0	0	0	0	0	0	12	1	11	12	13	29	0.245283	1	0	0	1	1	37498	0	37498	0	1	0.245283	virus-like	NA	0	11	0	0	0	High-quality	100	AAI-based (medium-confidence)	NA
Capsule1_03140608	135912	5001	7	6	6	37473	35073	30.63	0	11	82	0	0	0	0	0	0	0	0	0	12	0	10	12	12	60	0.146341	6	0	0	6	1	37473	0	37473	0	1	0.146341	virus-like	NA	0	5	0	4	0	High-quality	100	AAI-based (high-confidence)	NA
Capsule1_02110014	130051	6874	14	7	7	38553	35753	33.36	0	11	58	0	0	0	0	0	0	0	0	0	11	0	3	11	11	44	0.189655	6	1	0	7	1	37455	1098	38553	0	1	0.189655	virus-like	NA	0	5	1	0	0	Medium-quality	60.06	AAI-based (high-confidence)	NA
Capsule1_05081206	208999	6654	12	5	5	37438	35438	41.26	0	11	52	0	0	0	0	0	0	0	0	0	12	0	10	12	12	30	0.230769	5	0	0	5	1	37438	0	37438	0	1	0.230769	virus-like	NA	0	13	0	0	1	Medium-quality	54.64	AAI-based (medium-confidence)	NA
Capsule1_11080203	250058	7202	6	3	3	41158	39958	33.97	0	11	66	0	0	0	0	0	0	0	0	0	8	1	19	8	9	38	0.136364	2	1	0	3	1	37422	3736	41158	0	1	0.136364	virus-like	NA	0	8	4	0	0	High-quality	93.15	AAI-based (high-confidence)	NA
Capsule1_19201203	357808	8789	21	7	7	47329	44529	36.26	0	11	66	0	0	0	0	0	0	0	0	1	10	1	6	11	12	48	0.181818	4	3	0	7	1	37378	9951	47329	0	1	0.181818	virus-like	NA	0	4	0	0	1	Medium-quality	73.56	AAI-based (high-confidence)	low-confidence DTR
Capsule1_20190822	104127	8262	25	10	10	47148	43148	35.29	0	11	65	0	0	0	0	0	0	0	0	2	9	0	6	11	11	48	0.169231	5	5	0	10	1	37374	9774	47148	0	1	0.169231	virus-like	NA	0	3	2	2	0	Low-quality	46.11	HMM-based (lower-bound)	NA
Capsule1_04060909	718151	9701	11	6	5	51347	48347	44.94	0	11	53	0	0	0	0	0	0	0	0	0	6	0	5	6	6	42	0.113208	2	4	0	6	1	37274	14073	51347	0	1	0.113208	virus-like	NA	1	1	1	0	0	Medium-quality	76.35	AAI-based (medium-confidence)	NA
Capsule1_16111703	88308	6846	12	5	5	38647	36647	40.14	0	11	52	0	0	0	0	0	0	0	0	0	5	0	16	5	5	31	0.0961538	4	1	0	5	1	37250	1397	38647	0	1	0.0961538	virus-like	NA	0	10	0	0	2	Medium-quality	52.27	AAI-based (medium-confidence)	NA
Capsule1_06230207	195196	8706	58	17	17	45705	38905	40.69	0	11	63	0	0	0	0	0	0	0	0	2	6	0	32	8	8	23	0.126984	14	2	1	16	0.941176	37219	5219	42438	1007	0.92852	0.13676	virus-like	NA	0	22	2	0	0	Low-quality	26	AAI-based (high-confidence)	NA
Capsule1_20012316	56016	7842	32	8	8	41644	38444	32.71	0	11	55	0	0	0	0	0	0	0	0	0	11	1	6	11	12	37	0.218182	6	1	1	7	0.875	37163	2770	39933	1711	0.958914	0.22753	virus-like	NA	1	7	0	0	0	High-quality	100	AAI-based (medium-confidence)	NA
Capsule1_08041412	140918	7450	5	2	2	38373	37573	39.42	0	11	50	0	0	0	0	0	0	0	0	0	8	2	3	8	10	37	0.2	1	0	1	1	0.5	37129	0	37129	1244	0.967581	0.206701	virus-like	NA	0	3	0	0	0	Medium-quality	62.51	AAI-based (high-confidence)	NA
Capsule1_00231222	166547	4896	13	5	5	38154	36154	45.4	0	11	59	0	0	0	0	0	0	0	0	1	18	1	7	19	20	32	0.338983	4	1	0	5	1	37116	1038	38154	0	1	0.338983	virus-like	NA	2	10	0	0	0	High-quality	100	AAI-based (medium-confidence)	NA
Capsule1_00082209	189779	6523	21	8	8	37088	33888	49	0	11	47	0	0	0	0	0	0	0	0	1	11	0	5	12	12	30	0.255319	8	0	0	8	1	37088	0	37088	0	1	0.255319	virus-like	NA	0	5	2	2	0	Medium-quality	64.14	AAI-based (high-confidence)	NA
Capsule1_09220106	250016	8041	26	7	7	41578	38778	52.79	0	11	69	0	0	0	0	0	0	0	0	0	14	1	5	14	15	49	0.217391	6	1	0	7	1	37016	4562	41578	0	1	0.217391	virus-like	NA	0	3	1	0	2	Medium-quality	68.56	AAI-based (high-confidence)	NA
Capsule1_18111521	336140	6678	20	7	7	41317	38517	35.58	0	11	51	0	0	0	0	0	0	0	0	0	9	1	7	9	10	34	0.196078	5	1	1	6	0.857143	36975	2102	39077	2240	0.945785	0.207318	virus-like	NA	0	2	3	0	0	Medium-quality	61.06	AAI-based (high-confidence)	NA
Capsule1_14130914	124477	6785	9	2	2	37907	37107	35.54	0	11	35	0	0	0	0	0	0	0	0	0	6	1	13	6	7	15	0.2	1	1	0	2	1	36892	1015	37907	0	1	0.2	virus-like	NA	0	7	0	0	0	Medium-quality	73.32	AAI-based (high-confidence)	NA
Capsule1_05172307	276671	7314	8	3	3	36883	35683	46.65	0	11	47	0	0	0	0	0	0	0	0	0	16	1	9	16	17	21	0.361702	3	0	0	3	1	36883	0	36883	0	1	0.361702	virus-like	NA	0	6	2	3	4	High-quality	91.75	AAI-based (medium-confidence)	NA
Capsule1_23232123	83530	7660	15	5	5	41093	39093	35.32	0	11	42	0	0	0	0	0	0	0	0	0	10	1	5	10	11	26	0.261905	3	2	0	5	1	36671	4422	41093	0	1	0.261905	virus-like	NA	0	5	3	0	0	Medium-quality	65.12	AAI-based (high-confidence)	NA
Capsule1_12052018	343656	6718	4	1	1	36620	36220	49.97	0	11	33	0	0	0	0	0	0	0	0	0	6	0	7	6	6	20	0.181818	1	0	0	1	1	36620	0	36620	0	1	0.181818	virus-like	NA	0	7	1	0	0	High-quality	98.04	AAI-based (medium-confidence)	NA
Capsule1_23200916	170180	7418	13	5	5	37778	35778	39.86	0	11	49	0	0	0	0	0	0	0	0	0	9	2	12	9	11	26	0.22449	4	1	0	5	1	36571	1207	37778	0	1	0.22449	virus-like	NA	0	8	0	0	0	Medium-quality	77.84	AAI-based (high-confidence)	NA
Capsule1_13100406	265250	9596	15	6	6	52247	49847	37.67	0	11	77	0	0	0	0	0	0	0	0	1	16	0	8	17	17	52	0.220779	4	2	0	6	1	36530	15717	52247	0	1	0.220779	virus-like	NA	0	5	1	3	0	Medium-quality	86.73	AAI-based (high-confidence)	NA
Capsule1_19150222	171951	6640	6	3	3	36454	35254	49.14	0	11	57	0	0	0	0	0	0	0	0	0	12	0	13	12	12	32	0.210526	3	0	0	3	1	36454	0	36454	0	1	0.210526	virus-like	NA	0	8	1	0	1	Medium-quality	89.23	AAI-based (high-confidence)	NA
Capsule1_15111722	130045	6709	13	4	4	37327	35727	36.28	0	11	34	0	0	0	0	0	0	0	0	0	5	2	0	5	7	27	0.205882	4	0	0	4	1	36366	0	36366	0	0.974255	0.211323	virus-like	NA	0	4	1	1	0	Medium-quality	60.37	AAI-based (high-confidence)	NA
Capsule1_03230516	166506	7483	11	5	5	41665	39665	36.38	0	11	53	0	0	0	0	0	0	0	0	0	11	3	16	11	14	23	0.264151	2	2	1	4	0.8	36355	3756	40111	1554	0.962703	0.274385	virus-like	NA	0	9	0	0	1	Medium-quality	76.79	AAI-based (high-confidence)	NA
Capsule1_17111515	175429	7149	16	9	9	42313	38713	38.14	0	11	55	0	0	0	0	0	0	0	0	0	12	2	13	12	14	28	0.254545	6	2	1	8	0.888889	36274	4575	40849	1464	0.965401	0.263668	virus-like	NA	1	9	0	1	1	Medium-quality	74.23	AAI-based (high-confidence)	NA
Capsule1_03020021	383040	5464	9	4	4	36109	34509	33.03	0	11	53	0	0	0	0	0	0	0	0	0	6	2	8	6	8	37	0.150943	4	0	0	4	1	36109	0	36109	0	1	0.150943	virus-like	NA	0	5	0	2	0	Low-quality	28.59	HMM-based (lower-bound)	NA
Capsule1_00051217	262624	9755	5	3	3	57423	56223	47.13	0	11	67	0	0	0	0	0	0	0	0	1	18	1	6	19	20	41	0.298507	2	1	0	3	1	36101	21322	57423	0	1	0.298507	virus-like	NA	1	4	2	2	0	High-quality	92.04	AAI-based (medium-confidence)	NA
Capsule1_06111821	498577	8322	11	7	7	41902	39102	38.85	0	11	55	0	0	0	0	0	0	0	0	0	10	2	5	10	12	38	0.218182	5	2	0	7	1	36071	5831	41902	0	1	0.218182	virus-like	NA	0	2	1	1	0	Medium-quality	69.22	AAI-based (high-confidence)	NA
Capsule1_03170408	121205	9115	18	11	11	49309	44909	36.83	0	11	64	0	0	0	0	0	0	0	0	1	11	0	13	12	12	39	0.1875	8	2	1	10	0.909091	35994	11381	47375	1934	0.960778	0.195154	virus-like	NA	0	5	3	1	0	Medium-quality	75.9	AAI-based (high-confidence)	NA
Capsule1_15042207	407820	7035	13	5	5	36935	34935	36.99	0	11	39	0	0	0	0	0	0	0	0	0	9	0	0	9	9	30	0.230769	4	1	0	5	1	35809	1126	36935	0	1	0.230769	virus-like	NA	0	4	0	0	0	Medium-quality	58.08	AAI-based (high-confidence)	NA
Capsule1_14220318	297758	6766	17	7	7	37031	34231	36.46	0	11	58	0	0	0	0	0	0	0	0	0	15	0	12	15	15	31	0.258621	6	1	0	7	1	35789	1242	37031	0	1	0.258621	virus-like	NA	0	12	3	1	0	Medium-quality	81.74	AAI-based (high-confidence)	NA
Capsule1_18140305	173794	6599	11	2	2	35781	34981	36.45	0	11	34	0	0	0	0	0	0	0	0	1	7	0	3	8	8	23	0.235294	2	0	0	2	1	35781	0	35781	0	1	0.235294	virus-like	NA	0	3	0	0	1	Medium-quality	56.88	AAI-based (high-confidence)	NA
Capsule1_03220918	223898	6496	15	6	6	35685	33285	53.98	0	11	45	0	0	0	0	0	0	0	0	0	16	0	9	16	16	20	0.355556	6	0	0	6	1	35685	0	35685	0	1	0.355556	virus-like	NA	0	8	1	0	1	Medium-quality	82.46	AAI-based (high-confidence)	NA
Capsule1_10110009	190937	6583	15	5	5	35656	33656	36.03	0	11	45	0	0	0	0	0	0	0	0	1	13	1	4	14	15	26	0.333333	5	0	0	5	1	35656	0	35656	0	1	0.333333	virus-like	NA	0	7	2	1	1	Medium-quality	55.39	AAI-based (high-confidence)	NA
Capsule1_03171322	203831	7512	22	8	8	41057	37857	36.35	0	11	59	0	0	0	0	0	0	0	0	0	8	3	4	8	11	44	0.186441	6	1	1	7	0.875	35635	4076	39711	1346	0.967216	0.19276	virus-like	NA	0	6	3	1	0	Medium-quality	62.59	AAI-based (high-confidence)	NA
Capsule1_00152312	80629	7217	13	7	7	42042	39242	31.77	0	11	60	0	0	0	0	0	0	0	0	1	9	1	1	10	11	48	0.183333	4	3	0	7	1	35569	6473	42042	0	1	0.183333	virus-like	NA	1	1	0	2	0	Medium-quality	60.89	AAI-based (medium-confidence)	NA
Capsule1_16020303	110153	5750	6	3	3	35569	34369	28.16	0	11	56	0	0	0	0	0	0	0	0	2	12	0	9	14	14	33	0.25	3	0	0	3	1	35569	0	35569	0	1	0.25	virus-like	NA	0	8	0	3	0	High-quality	90.19	AAI-based (high-confidence)	NA
Capsule1_05010312	122214	6168	10	4	4	35495	33895	37.53	0	11	45	0	0	0	0	0	0	0	0	0	6	1	10	6	7	28	0.155556	4	0	0	4	1	35495	0	35495	0	1	0.155556	virus-like	NA	0	8	0	0	0	High-quality	96.34	AAI-based (medium-confidence)	NA
Capsule1_17040321	324280	7003	15	7	7	40637	37837	35.99	0	11	64	0	0	0	0	0	0	0	0	1	8	0	10	9	9	45	0.140625	3	1	3	4	0.571429	35443	1450	36893	3744	0.907867	0.154896	virus-like	NA	0	8	2	1	0	Medium-quality	59.71	AAI-based (high-confidence)	NA
Capsule1_22050107	265581	6172	8	4	4	37680	36080	35.76	0	11	55	0	0	0	0	0	0	0	0	0	13	3	7	13	16	32	0.290909	3	1	0	4	1	35429	2251	37680	0	1	0.290909	virus-like	NA	0	4	0	0	1	Medium-quality	63.45	AAI-based (high-confidence)	NA
Capsule1_20221714	277465	6740	10	3	3	35347	34147	48.69	0	11	49	0	0	0	0	0	0	0	0	0	11	2	11	11	13	25	0.265306	3	0	0	3	1	35347	0	35347	0	1	0.265306	virus-like	NA	1	13	1	0	0	High-quality	100	AAI-based (high-confidence)	NA
Capsule1_09090412	113551	6603	3	2	2	35278	34478	46.8	0	11	50	0	0	0	0	0	0	0	0	0	9	0	11	9	9	30	0.18	2	0	0	2	1	35278	0	35278	0	1	0.18	virus-like	NA	1	12	0	2	0	High-quality	100	AAI-based (high-confidence)	NA
Capsule1_03132016	73908	6721	8	3	3	35240	34040	54.69	0	11	55	0	0	0	0	0	0	0	0	0	16	2	4	16	18	33	0.327273	3	0	0	3	1	35240	0	35240	0	1	0.327273	virus-like	NA	0	5	2	1	0	High-quality	100	AAI-based (high-confidence)	NA
Capsule1_20020818	449188	5745	6	4	4	35240	33640	33.4	0	11	59	0	0	0	0	0	0	0	0	0	11	0	11	11	11	37	0.186441	4	0	0	4	1	35240	0	35240	0	1	0.186441	virus-like	NA	0	7	1	0	0	Medium-quality	63.32	AAI-based (high-confidence)	NA
Capsule1_15040523	316578	7022	4	2	2	35232	34432	43.7	0	11	50	0	0	0	0	0	0	0	0	0	12	1	7	12	13	30	0.26	2	0	0	2	1	35232	0	35232	0	1	0.26	virus-like	NA	0	10	0	2	0	High-quality	100	AAI-based (high-confidence)	NA
Capsule1_09142218	300990	6935	11	4	4	37234	35634	34.47	0	11	55	0	0	0	0	0	0	0	0	0	5	1	14	5	6	35	0.109091	3	1	0	4	1	35178	2056	37234	0	1	0.109091	virus-like	NA	0	7	0	0	0	Medium-quality	72.51	AAI-based (high-confidence)	NA
Capsule1_02112305	258275	6989	6	2	2	35169	34369	45.37	0	11	42	0	0	0	0	0	0	0	0	1	5	1	21	6	7	14	0.166667	2	0	0	2	1	35169	0	35169	0	1	0.166667	virus-like	NA	0	11	0	1	1	Medium-quality	83.86	AAI-based (high-confidence)	NA
Capsule1_05202309	429873	7111	1	1	1	35097	34697	39.4	0	11	55	0	0	0	0	0	0	0	0	0	17	0	11	17	17	27	0.309091	1	0	0	1	1	35097	0	35097	0	1	0.309091	virus-like	NA	1	9	0	0	1	Complete	100	DTR (high-confidence)	NA
Capsule1_07230416	49021	5499	8	5	5	35070	33070	40.62	0	11	42	0	0	0	0	0	0	0	0	0	8	2	11	8	10	21	0.238095	5	0	0	5	1	35070	0	35070	0	1	0.238095	virus-like	NA	0	10	0	0	1	Medium-quality	67.32	AAI-based (high-confidence)	NA
Capsule1_21140918	269942	7950	17	9	9	44095	40495	34.83	0	11	63	0	0	0	0	0	0	0	0	0	11	4	4	11	15	44	0.238095	5	4	0	9	1	34999	9096	44095	0	1	0.238095	virus-like	NA	0	5	3	1	0	Low-quality	42.96	HMM-based (lower-bound)	NA
Capsule1_09050909	301652	6674	3	1	1	34962	34562	46.5	0	11	45	0	0	0	0	0	0	0	0	0	8	1	7	8	9	29	0.2	1	0	0	1	1	34962	0	34962	0	1	0.2	virus-like	NA	0	3	2	0	0	High-quality	96.75	AAI-based (high-confidence)	NA
Capsule1_23040510	167601	7016	12	7	7	41953	39153	38.12	0	11	44	0	0	0	0	0	0	0	0	0	9	0	4	9	9	31	0.204545	3	3	1	6	0.857143	34959	5964	40923	1030	0.975449	0.209694	virus-like	NA	0	5	0	2	0	Medium-quality	63.63	AAI-based (medium-confidence)	NA
Capsule1_15082003	462625	7743	27	8	8	40516	37316	52.42	0	11	41	0	0	0	0	0	0	0	0	0	4	0	4	4	4	33	0.097561	6	2	0	8	1	34942	5574	40516	0	1	0.097561	virus-like	NA	1	2	1	1	1	Medium-quality	74.22	AAI-based (high-confidence)	NA
Capsule1_03102120	323124	5568	9	3	3	34939	33739	45.01	0	11	49	0	0	0	0	0	0	0	0	0	22	0	9	22	22	18	0.44898	3	0	0	3	1	34939	0	34939	0	1	0.44898	virus-like	NA	0	10	1	4	0	High-quality	100	AAI-based (high-confidence)	NA
Capsule1_05130217	122922	6837	2	2	2	37292	36492	34.41	0	11	61	0	0	0	0	0	0	0	0	3	15	1	6	18	19	36	0.311475	1	1	0	2	1	34938	2354	37292	0	1	0.311475	virus-like	NA	1	7	1	4	0	High-quality	98.21	AAI-based (high-confidence)	NA
Capsule1_22112310	258333	6510	2	2	2	34885	34085	32.08	0	11	58	0	0	0	0	0	0	0	0	0	13	0	10	13	13	35	0.224138	2	0	0	2	1	34885	0	34885	0	1	0.224138	virus-like	NA	0	7	0	0	0	High-quality	98.48	AAI-based (high-confidence)	NA
Capsule1_13171103	338752	9594	21	7	7	53915	51115	57.25	0	11	93	0	0	0	0	0	0	0	0	0	26	2	6	26	28	59	0.301075	3	1	3	4	0.571429	34793	12630	47423	6492	0.879588	0.342291	virus-like	NA	1	2	1	8	1	Medium-quality	88.74	AAI-based (high-confidence)	NA
Capsule1_07231504	59276	6555	13	3	3	34773	33573	38.3	0	11	57	0	0	0	0	0	0	0	0	2	28	1	4	30	31	22	0.54386	3	0	0	3	1	34773	0	34773	0	1	0.54386	virus-like	NA	0	6	5	0	1	Medium-quality	70.75	AAI-based (high-confidence)	NA
Capsule1_05000203	157207	6368	4	2	2	34763	33963	31.07	0	11	63	0	0	0	0	0	0	0	0	0	19	1	11	19	20	32	0.31746	2	0	0	2	1	34763	0	34763	0	1	0.31746	virus-like	NA	0	10	0	1	0	Medium-quality	87.95	AAI-based (high-confidence)	NA
Capsule1_14071715	130007	6741	5	3	3	34738	33538	35.71	0	11	54	0	0	0	0	0	0	0	0	0	15	0	5	15	15	34	0.277778	3	0	0	3	1	34738	0	34738	0	1	0.277778	virus-like	NA	0	6	1	0	2	High-quality	95.75	AAI-based (high-confidence)	NA
Capsule1_20231123	151225	7258	17	8	8	44246	41046	32.76	0	11	43	0	0	0	0	0	0	0	0	1	7	2	3	8	10	30	0.232558	5	3	0	8	1	34726	9520	44246	0	1	0.232558	virus-like	NA	0	5	0	0	0	Medium-quality	68.95	AAI-based (high-confidence)	NA
Capsule1_02171605	91304	5242	26	9	9	46565	42965	35.5	0	11	75	0	0	0	0	0	0	0	0	0	9	3	12	9	12	51	0.16	6	3	0	9	1	34694	11871	46565	0	1	0.16	virus-like	NA	0	9	4	0	0	High-quality	100	AAI-based (high-confidence)	high kmer_freq may indicate large duplication
Capsule1_23160306	243035	6636	5	2	2	34668	33868	48.32	0	11	37	0	0	0	0	0	0	0	0	0	10	0	15	10	10	12	0.27027	2	0	0	2	1	34668	0	34668	0	1	0.27027	virus-like	NA	1	17	1	0	0	Medium-quality	86.34	AAI-based (high-confidence)	NA
Capsule1_17050906	141487	6865	14	5	5	37595	35595	38.11	0	11	46	0	0	0	0	0	0	0	0	0	9	1	10	9	10	26	0.217391	3	2	0	5	1	34661	2934	37595	0	1	0.217391	virus-like	NA	0	7	4	0	0	Medium-quality	69.18	AAI-based (high-confidence)	NA
Capsule1_13141212	143616	6394	1	1	1	34648	34248	45.95	0	11	56	0	0	0	0	0	0	0	0	0	19	1	5	19	20	31	0.357143	1	0	0	1	1	34648	0	34648	0	1	0.357143	virus-like	NA	0	9	1	1	1	Complete	100	DTR (high-confidence)	NA
Capsule1_11112109	137402	6694	5	2	2	34482	33682	31.23	0	11	61	0	0	0	0	0	0	0	0	0	9	0	11	9	9	41	0.147541	2	0	0	2	1	34482	0	34482	0	1	0.147541	virus-like	NA	0	9	0	0	0	High-quality	90.03	AAI-based (high-confidence)	NA
Capsule1_09111715	139903	6320	4	3	3	34470	33270	46.67	0	11	49	0	0	0	0	0	0	0	0	0	8	1	7	8	9	33	0.183673	3	0	0	3	1	34470	0	34470	0	1	0.183673	virus-like	NA	0	3	2	0	0	High-quality	95.68	AAI-based (medium-confidence)	NA
Capsule1_23082009	120091	6236	11	5	5	34435	32435	33.81	0	11	53	0	0	0	0	0	0	0	0	0	5	0	12	5	5	36	0.0943396	5	0	0	5	1	34435	0	34435	0	1	0.0943396	virus-like	NA	0	4	0	0	0	Medium-quality	61.38	AAI-based (high-confidence)	NA
Capsule1_00230723	373246	8028	13	8	8	43818	40618	34.56	0	11	61	0	0	0	0	0	0	0	0	0	16	2	10	16	18	33	0.295082	5	3	0	8	1	34383	9435	43818	0	1	0.295082	virus-like	NA	1	3	3	1	0	Medium-quality	75.26	AAI-based (high-confidence)	NA
Capsule1_04071106	168924	6499	5	2	2	34313	33513	49.13	0	11	59	0	0	0	0	0	0	0	0	0	8	0	7	8	8	44	0.135593	2	0	0	2	1	34313	0	34313	0	1	0.135593	virus-like	NA	1	6	0	1	0	High-quality	97.92	AAI-based (high-confidence)	NA
Capsule1_20191717	188841	7586	21	6	6	42076	39676	36.65	0	11	62	0	0	0	0	0	0	0	0	1	12	0	7	13	13	42	0.209677	2	4	0	6	1	34290	7786	42076	0	1	0.209677	virus-like	NA	0	4	2	0	0	Medium-quality	66.99	AAI-based (high-confidence)	NA
Capsule1_19171304	100870	6493	9	5	5	34265	32265	40.75	0	11	50	0	0	0	0	0	0	0	0	0	8	1	15	8	9	26	0.18	5	0	0	5	1	34265	0	34265	0	1	0.18	virus-like	NA	0	11	1	2	0	Medium-quality	85.92	AAI-based (high-confidence)	NA
Capsule1_03051814	378363	6543	6	3	3	34182	32982	40.51	0	11	32	0	0	0	0	0	0	0	0	0	5	0	11	5	5	16	0.15625	3	0	0	3	1	34182	0	34182	0	1	0.15625	virus-like	NA	0	7	0	0	0	Medium-quality	65.81	AAI-based (high-confidence)	NA
Capsule1_22190010	91424	5602	16	7	7	40145	37345	34.29	0	11	35	0	0	0	0	0	0	0	0	0	7	1	1	7	8	26	0.228571	5	2	0	7	1	34133	6012	40145	0	1	0.228571	virus-like	NA	0	5	0	0	1	Medium-quality	64.33	AAI-based (medium-confidence)	NA
Capsule1_20050220	290563	7200	17	6	6	36849	34449	44.84	0	11	51	0	0	0	0	0	0	0	0	0	14	4	5	14	18	28	0.352941	5	0	1	5	0.833333	34097	0	34097	1580	0.925317	0.381427	virus-like	NA	0	3	2	0	0	Medium-quality	60.2	AAI-based (high-confidence)	NA
Capsule1_15052011	347666	6792	7	1	1	34094	33694	48.77	0	11	37	0	0	0	0	0	0	0	0	0	6	0	12	6	6	19	0.162162	1	0	0	1	1	34094	0	34094	0	1	0.162162	virus-like	NA	0	12	1	0	0	Medium-quality	85.43	AAI-based (high-confidence)	NA
Capsule1_23050200	134696	7408	11	6	6	41559	39159	35.64	0	11	49	0	0	0	0	0	0	0	0	1	9	1	4	10	11	34	0.22449	3	3	0	6	1	34090	7469	41559	0	1	0.22449	virus-like	NA	0	3	1	0	1	Medium-quality	64.59	AAI-based (high-confidence)	NA
Capsule1_01100618	346160	6658	1	1	1	34072	33672	49.93	0	11	42	0	0	0	0	0	0	0	0	1	12	0	7	13	13	22	0.309524	1	0	0	1	1	34072	0	34072	0	1	0.309524	virus-like	NA	1	8	1	3	0	High-quality	100	AAI-based (high-confidence)	NA
Capsule1_19141705	133846	5846	7	3	3	38371	37171	36.08	0	11	46	0	0	0	0	0	0	0	0	0	2	3	15	2	5	26	0.108696	2	1	0	3	1	34021	4350	38371	0	1	0.108696	virus-like	NA	0	7	0	0	0	Medium-quality	71.5	AAI-based (medium-confidence)	NA
Capsule1_15200719	210355	5939	3	3	3	33959	32759	31.32	0	11	56	0	0	0	0	0	0	0	0	0	13	0	8	13	13	35	0.232143	3	0	0	3	1	33959	0	33959	0	1	0.232143	virus-like	NA	0	9	0	1	0	High-quality	97.88	AAI-based (high-confidence)	NA
Capsule1_19160300	153392	6914	14	2	2	33901	33101	46.86	0	11	53	0	0	0	0	0	0	0	0	0	14	1	18	14	15	20	0.283019	2	0	0	2	1	33901	0	33901	0	1	0.283019	virus-like	NA	0	12	1	1	0	Medium-quality	74.58	AAI-based (high-confidence)	NA
Capsule1_11112122	151490	5887	23	7	7	33884	31084	41.72	0	11	44	0	0	0	0	0	0	0	0	0	9	1	11	9	10	23	0.227273	7	0	0	7	1	33884	0	33884	0	1	0.227273	virus-like	NA	0	11	1	0	1	Low-quality	49.4	AAI-based (high-confidence)	NA
Capsule1_12012315	118754	6509	13	4	4	33873	32273	45.51	0	11	40	0	0	0	0	0	0	0	0	0	4	3	9	4	7	24	0.175	4	0	0	4	1	33873	0	33873	0	1	0.175	virus-like	NA	0	5	0	1	0	Medium-quality	63.66	AAI-based (high-confidence)	NA
Capsule1_01051209	279741	6457	84	4	4	39365	37765	38.39	0	11	52	0	0	0	0	0	0	0	0	0	7	1	16	7	8	28	0.153846	3	1	0	4	1	33856	1390	35246	0	0.895364	0.171825	virus-like	NA	0	12	0	1	0	Medium-quality	67.29	AAI-based (high-confidence)	NA
Capsule1_04140612	124647	5820	13	6	6	33839	31439	38.75	0	11	52	0	0	0	0	0	0	0	0	0	6	2	10	6	8	34	0.153846	6	0	0	6	1	33839	0	33839	0	1	0.153846	virus-like	NA	0	9	0	1	0	Medium-quality	75.64	AAI-based (medium-confidence)	NA
Capsule1_22011316	187443	6163	1	1	1	33774	33374	36	0	11	54	0	0	0	0	0	0	0	0	1	8	0	3	9	9	42	0.166667	1	0	0	1	1	33774	0	33774	0	1	0.166667	virus-like	NA	0	3	0	0	0	High-quality	100	AAI-based (high-confidence)	NA
Capsule1_16221814	64588	4969	15	6	6	35381	32981	34.33	0	11	41	0	0	0	0	0	0	0	0	0	9	2	1	9	11	29	0.268293	5	1	0	6	1	33743	1638	35381	0	1	0.268293	virus-like	NA	0	3	1	1	0	Medium-quality	59.78	AAI-based (high-confidence)	NA
Capsule1_21221920	297566	5947	1	1	1	33742	33342	33.34	0	11	57	0	0	0	0	0	0	0	0	1	8	0	9	9	9	39	0.157895	1	0	0	1	1	33742	0	33742	0	1	0.157895	virus-like	NA	1	8	0	1	1	Low-quality	37.42	HMM-based (lower-bound)	low-confidence DTR
Capsule1_03131006	136999	6188	3	2	2	33720	32920	40.75	0	11	46	0	0	0	0	0	0	0	0	2	7	0	6	9	9	31	0.195652	2	0	0	2	1	33720	0	33720	0	1	0.195652	virus-like	NA	0	5	0	0	0	Low-quality	44.1	AAI-based (high-confidence)	NA
Capsule1_03151921	312945	6037	17	7	7	35064	32264	38.14	0	11	49	0	0	0	0	0	0	0	0	1	11	1	1	12	13	35	0.265306	6	0	1	6	0.857143	33525	0	33525	1539	0.956109	0.277485	virus-like	NA	0	7	1	0	1	Medium-quality	52.32	AAI-based (medium-confidence)	NA
Capsule1_03132220	142315	6267	12	6	6	33524	31124	42.88	0	11	43	0	0	0	0	0	0	0	0	1	13	0	6	14	14	23	0.325581	6	0	0	6	1	33524	0	33524	0	1	0.325581	virus-like	NA	1	7	1	0	0	Medium-quality	57.72	AAI-based (medium-confidence)	NA
Capsule1_05081513	168102	7086	15	7	7	41062	38262	35.26	0	11	59	0	0	0	0	0	0	0	0	0	11	3	3	11	14	42	0.237288	4	2	1	6	0.857143	33503	5693	39196	1866	0.954557	0.248585	virus-like	NA	0	6	2	1	0	Medium-quality	60.9	AAI-based (high-confidence)	NA
Capsule1_19050803	419795	6404	9	2	2	33494	32694	44.64	0	11	42	0	0	0	0	0	0	0	0	0	10	2	7	10	12	23	0.285714	2	0	0	2	1	33494	0	33494	0	1	0.285714	virus-like	NA	1	8	1	0	0	Medium-quality	82.37	AAI-based (medium-confidence)	NA
Capsule1_22060111	247868	6971	4	2	2	34679	33879	43.25	0	11	52	0	0	0	0	0	0	0	0	0	10	1	11	10	11	30	0.211538	1	1	0	2	1	33480	1199	34679	0	1	0.211538	virus-like	NA	0	8	1	1	1	High-quality	91.26	AAI-based (high-confidence)	NA
Capsule1_01231709	249335	6391	2	1	1	33458	33058	54.62	0	11	50	0	0	0	0	0	0	0	0	0	17	2	5	17	19	26	0.38	1	0	0	1	1	33458	0	33458	0	1	0.38	virus-like	NA	1	7	1	0	1	High-quality	100	AAI-based (high-confidence)	NA
Capsule1_02172115	148892	8544	14	7	7	52570	49770	41.75	0	11	59	0	0	0	0	0	0	0	0	1	16	0	7	17	17	35	0.288136	5	2	0	7	1	33447	19123	52570	0	1	0.288136	virus-like	NA	1	2	3	3	0	Medium-quality	84.59	AAI-based (high-confidence)	NA
Capsule1_05232020	155930	7412	12	4	4	37946	36346	45.58	0	11	59	0	0	0	0	0	0	0	0	0	15	2	6	15	17	36	0.288136	3	1	0	4	1	33432	4514	37946	0	1	0.288136	virus-like	NA	1	9	2	0	0	High-quality	93.15	AAI-based (high-confidence)	NA
Capsule1_03142219	135470	5939	6	4	4	33413	31813	28.09	0	11	59	0	0	0	0	0	0	0	0	4	15	0	6	19	19	34	0.322034	4	0	0	4	1	33413	0	33413	0	1	0.322034	virus-like	NA	0	7	0	2	0	Medium-quality	84.86	AAI-based (medium-confidence)	NA
Capsule1_18010015	116326	5372	15	6	6	33412	31012	34.82	0	11	47	0	0	0	0	0	0	0	0	0	9	1	6	9	10	31	0.212766	6	0	0	6	1	33412	0	33412	0	1	0.212766	virus-like	NA	0	5	0	0	0	Medium-quality	51.88	AAI-based (high-confidence)	NA
Capsule1_02231317	194141	6625	10	4	4	36867	35267	34.88	0	11	56	0	0	0	0	0	0	0	0	1	9	1	4	10	11	41	0.196429	3	1	0	4	1	33383	3484	36867	0	1	0.196429	virus-like	NA	0	3	0	2	1	Medium-quality	81.18	AAI-based (high-confidence)	NA
Capsule1_01150318	523497	6294	10	3	3	33378	32178	42.56	0	11	46	0	0	0	0	0	0	0	0	0	4	2	11	4	6	29	0.130435	3	0	0	3	1	33378	0	33378	0	1	0.130435	virus-like	NA	0	9	1	0	0	Medium-quality	88.46	AAI-based (high-confidence)	NA
Capsule1_02102109	475558	6691	5	3	3	34557	33357	42.87	0	11	65	0	0	0	0	0	0	0	0	0	14	2	8	14	16	41	0.246154	2	1	0	3	1	33330	1227	34557	0	1	0.246154	virus-like	NA	0	8	1	3	0	Medium-quality	50.47	HMM-based (lower-bound)	NA
Capsule1_18161516	78210	5839	17	5	5	36467	34467	35.26	0	11	53	0	0	0	0	0	0	0	0	2	3	0	4	5	5	44	0.0943396	3	2	0	5	1	33320	3147	36467	0	1	0.0943396	virus-like	NA	0	3	0	0	0	Medium-quality	58.14	AAI-based (medium-confidence)	NA
Capsule1_08100006	171118	5961	18	7	7	34890	32090	35.77	0	11	41	0	0	0	0	0	0	0	0	1	3	0	10	4	4	27	0.097561	6	1	0	7	1	33244	1646	34890	0	1	0.097561	virus-like	NA	0	4	1	2	0	Medium-quality	55.83	AAI-based (high-confidence)	NA
Capsule1_01232218	357645	6147	3	2	2	33194	32394	44.36	0	11	50	0	0	0	0	0	0	0	0	0	5	2	7	5	7	36	0.14	2	0	0	2	1	33194	0	33194	0	1	0.14	virus-like	NA	0	3	1	2	0	High-quality	95.68	AAI-based (high-confidence)	NA
Capsule1_13201206	388656	6436	11	3	3	32998	31798	36.38	0	11	41	0	0	0	0	0	0	0	0	0	13	0	6	13	13	22	0.317073	3	0	0	3	1	32998	0	32998	0	1	0.317073	virus-like	NA	0	6	1	1	0	Medium-quality	52.31	AAI-based (high-confidence)	NA
Capsule1_09011107	231494	5702	26	10	10	39422	35422	34.01	0	11	78	0	0	0	0	0	0	0	0	2	3	1	10	5	6	62	0.0769231	6	3	1	9	0.9	32938	5279	38217	1205	0.969433	0.0793485	virus-like	NA	0	3	1	0	0	Low-quality	28.59	HMM-based (lower-bound)	NA
Capsule1_06150807	336204	5903	1	1	1	32912	32512	33.72	0	11	51	0	0	0	0	0	0	0	0	0	13	2	9	13	15	27	0.294118	1	0	0	1	1	32912	0	32912	0	1	0.294118	virus-like	NA	0	7	1	1	2	High-quality	98.04	AAI-based (high-confidence)	NA
Capsule1_02001810	326953	6462	6	4	4	32788	31188	44.9	0	11	48	0	0	0	0	0	0	0	0	0	7	2	6	7	9	33	0.1875	4	0	0	4	1	32788	0	32788	0	1	0.1875	virus-like	NA	0	8	0	0	0	High-quality	90.39	AAI-based (high-confidence)	NA
Capsule1_23021606	181081	6711	17	7	7	41598	38798	40.28	0	11	72	0	0	0	0	0	0	0	0	1	6	1	15	7	8	49	0.111111	5	2	0	7	1	32742	8856	41598	0	1	0.111111	virus-like	NA	0	4	2	0	0	Medium-quality	51.32	HMM-based (lower-bound)	NA
Capsule1_22140006	115331	6456	14	8	8	32714	29514	35.34	0	11	48	0	0	0	0	0	0	0	0	0	13	1	1	13	14	33	0.291667	8	0	0	8	1	32714	0	32714	0	1	0.291667	virus-like	NA	0	5	1	0	1	Medium-quality	51.03	AAI-based (high-confidence)	NA
Capsule1_02201706	144251	4603	4	2	2	32695	31895	42.38	0	11	46	0	0	0	0	0	0	0	0	0	22	0	4	22	22	20	0.478261	2	0	0	2	1	32695	0	32695	0	1	0.478261	virus-like	NA	0	9	0	1	0	High-quality	100	AAI-based (high-confidence)	NA
Capsule1_02172306	139458	6381	3	2	2	33781	32981	32.21	0	11	48	0	0	0	0	0	0	0	0	0	13	2	9	13	15	24	0.3125	1	1	0	2	1	32671	1110	33781	0	1	0.3125	virus-like	NA	1	10	2	0	1	High-quality	93.48	AAI-based (high-confidence)	NA
Capsule1_05201108	124033	6177	4	2	2	32648	31848	35.81	0	11	53	0	0	0	0	0	0	0	0	1	6	1	4	7	8	41	0.150943	2	0	0	2	1	32648	0	32648	0	1	0.150943	virus-like	NA	0	3	0	0	0	High-quality	97.05	AAI-based (high-confidence)	NA
Capsule1_19160715	115682	5045	7	4	4	32575	30975	35.52	0	11	42	0	0	0	0	0	0	0	0	2	4	0	4	6	6	32	0.142857	4	0	0	4	1	32575	0	32575	0	1	0.142857	virus-like	NA	0	3	0	0	0	Medium-quality	51.62	AAI-based (medium-confidence)	NA
Capsule1_23111911	230334	6340	2	1	1	32559	32159	42.03	0	11	56	0	0	0	0	0	0	0	0	1	10	2	8	11	13	35	0.232143	1	0	0	1	1	32559	0	32559	0	1	0.232143	virus-like	NA	1	11	2	1	0	High-quality	98.95	AAI-based (high-confidence)	NA
Capsule1_14070809	370866	5717	17	6	6	36376	33976	36.71	0	11	56	0	0	0	0	0	0	0	0	0	16	0	8	16	16	32	0.285714	4	1	1	5	0.833333	32495	2572	35067	1309	0.964015	0.29638	virus-like	NA	0	2	3	1	0	Medium-quality	57.19	AAI-based (high-confidence)	NA
Capsule1_07232218	220635	5543	7	4	4	33782	32182	31.78	0	11	51	0	0	0	0	0	0	0	0	0	11	0	8	11	11	32	0.215686	3	1	0	4	1	32471	1311	33782	0	1	0.215686	virus-like	NA	0	6	0	1	0	High-quality	96.17	AAI-based (high-confidence)	NA
Capsule1_14160621	516069	6397	4	2	2	32442	31642	36.37	0	11	49	0	0	0	0	0	0	0	0	0	18	2	9	18	20	20	0.408163	2	0	0	2	1	32442	0	32442	0	1	0.408163	virus-like	NA	0	8	1	1	1	High-quality	100	AAI-based (high-confidence)	NA
Capsule1_14080620	283012	7262	46	13	13	40712	35512	31.5	0	11	53	0	0	0	0	0	0	0	0	0	6	1	3	6	7	43	0.132075	7	4	2	11	0.846154	32430	5780	38210	2502	0.938544	0.140724	virus-like	NA	0	5	2	0	0	Low-quality	39.55	AAI-based (medium-confidence)	NA
Capsule1_14132111	238604	7276	14	5	5	38028	36028	46.84	0	11	45	0	0	0	0	0	0	0	0	0	6	1	17	6	7	21	0.155556	4	1	0	5	1	32398	5630	38028	0	1	0.155556	virus-like	NA	1	7	2	2	1	Medium-quality	69.49	AAI-based (high-confidence)	NA
Capsule1_10140318	754193	6938	15	5	5	36220	34220	34.81	0	11	61	0	0	0	0	0	0	0	0	0	13	0	11	13	13	37	0.213115	3	1	1	4	0.8	32388	1268	33656	2564	0.92921	0.22935	virus-like	NA	0	6	1	0	0	Medium-quality	56.66	AAI-based (high-confidence)	NA
Capsule1_16141407	83051	5848	24	10	10	36399	32399	36.95	0	11	38	0	0	0	0	0	0	0	0	0	8	2	3	8	10	25	0.263158	8	2	0	10	1	32361	4038	36399	0	1	0.263158	virus-like	NA	0	4	2	0	0	Medium-quality	56.76	AAI-based (high-confidence)	NA
Capsule1_03052321	356315	5106	5	4	4	32352	30752	33.25	0	11	62	0	0	0	0	0	0	0	0	0	16	0	5	16	16	41	0.258065	4	0	0	4	1	32352	0	32352	0	1	0.258065	virus-like	NA	0	5	1	0	3	High-quality	94.88	AAI-based (high-confidence)	NA
Capsule1_10060904	207455	6189	2	1	1	32336	31936	43.62	0	11	51	0	0	0	0	0	0	0	0	0	18	0	10	18	18	23	0.352941	1	0	0	1	1	32336	0	32336	0	1	0.352941	virus-like	NA	2	13	1	1	1	Complete	100	DTR (high-confidence)	NA
Capsule1_09110013	521016	6538	8	4	4	32312	30712	39.38	0	11	52	0	0	0	0	0	0	0	0	0	17	0	9	17	17	26	0.326923	4	0	0	4	1	32312	0	32312	0	1	0.326923	virus-like	NA	1	7	0	0	1	High-quality	92.74	AAI-based (high-confidence)	NA
Capsule1_04232203	544254	5380	12	7	7	38072	35272	48.54	0	14	35	0	0	0	0	0	0	0	0	1	3	0	11	4	4	20	0.114286	5	2	0	7	1	32302	4764	37066	0	0.973576	0.117388	virus-like	NA	1	11	1	1	0	Medium-quality	89.09	AAI-based (high-confidence)	NA
Capsule1_02000209	297582	6604	12	2	2	33621	32821	33.62	0	11	16	0	0	0	0	0	0	0	0	0	0	1	0	0	1	15	0.0625	1	1	0	2	1	32256	1365	33621	0	1	0.0625	virus-like	NA	0	1	0	0	0	Low-quality	48.91	AAI-based (high-confidence)	NA
Capsule1_05130519	148039	5716	5	2	2	33330	32530	36.55	0	11	49	0	0	0	0	0	0	0	0	1	6	1	15	7	8	26	0.163265	1	1	0	2	1	32238	1092	33330	0	1	0.163265	virus-like	NA	1	9	0	3	0	High-quality	90.46	AAI-based (high-confidence)	NA
Capsule1_08140008	104979	5801	21	9	9	33548	29948	41.86	0	11	42	0	0	0	0	0	0	0	0	0	17	0	1	17	17	24	0.404762	8	1	0	9	1	32222	1326	33548	0	1	0.404762	virus-like	NA	1	1	1	0	0	Medium-quality	64.05	AAI-based (high-confidence)	NA
Capsule1_19111723	209656	6860	15	6	6	40747	38347	35.88	0	11	40	0	0	0	0	0	0	0	0	1	5	5	4	6	11	25	0.275	3	3	0	6	1	32185	8562	40747	0	1	0.275	virus-like	NA	0	3	0	0	0	Medium-quality	67.5	AAI-based (high-confidence)	NA
Capsule1_19192117	258126	6358	13	5	5	37942	35942	34.43	0	11	54	0	0	0	0	0	0	0	0	0	4	0	14	4	4	36	0.0740741	2	2	1	4	0.8	32157	4599	36756	1186	0.968742	0.0764642	virus-like	NA	0	6	0	0	0	Medium-quality	64.84	AAI-based (high-confidence)	NA
Capsule1_01051916	142627	10778	52	18	18	66251	59051	34.94	0	11	86	0	0	0	0	0	0	0	0	4	16	4	10	20	24	52	0.27907	9	4	5	13	0.722222	32100	20522	52622	13629	0.794282	0.351348	virus-like	NA	2	14	4	0	2	Low-quality	45.53	AAI-based (high-confidence)	NA
Capsule1_20110012	159962	5103	13	6	6	35530	33130	40.28	0	11	49	0	0	0	0	0	0	0	0	0	8	1	12	8	9	28	0.183673	5	1	0	6	1	32093	3437	35530	0	1	0.183673	virus-like	NA	0	13	0	2	0	Medium-quality	87.68	AAI-based (medium-confidence)	high kmer_freq may indicate large duplication
Capsule1_20050706	253433	6222	6	2	2	32086	31286	45.88	0	11	46	0	0	0	0	0	0	0	0	0	19	1	11	19	20	15	0.434783	2	0	0	2	1	32086	0	32086	0	1	0.434783	virus-like	NA	3	15	2	1	1	Medium-quality	85.27	AAI-based (medium-confidence)	NA
Capsule1_09052314	119974	4679	23	9	9	34023	30423	37.76	0	11	53	0	0	0	0	0	0	0	0	0	9	5	4	9	14	35	0.264151	8	1	0	9	1	32083	1940	34023	0	1	0.264151	virus-like	NA	0	8	1	6	0	High-quality	100	AAI-based (high-confidence)	high kmer_freq may indicate large duplication
Capsule1_00190215	185213	6364	12	5	5	33443	31443	42.27	0	11	41	0	0	0	0	0	0	0	0	1	6	0	11	7	7	23	0.170732	4	1	0	5	1	32075	1368	33443	0	1	0.170732	virus-like	NA	0	7	0	0	0	Medium-quality	62.34	AAI-based (medium-confidence)	NA
Capsule1_05170718	473223	4815	6	2	2	32074	31274	41.26	0	11	56	0	0	0	0	0	0	0	0	0	8	1	2	8	9	45	0.160714	2	0	0	2	1	32074	0	32074	0	1	0.160714	virus-like	NA	0	6	0	0	0	Medium-quality	87.85	AAI-based (high-confidence)	NA
Capsule1_02112118	246929	6339	8	5	5	32055	30055	32.51	0	11	53	0	0	0	0	0	0	0	0	0	16	1	7	16	17	29	0.320755	5	0	0	5	1	32055	0	32055	0	1	0.320755	virus-like	NA	1	9	1	0	2	Medium-quality	88.11	AAI-based (high-confidence)	NA
Capsule1_12051419	104247	5546	6	4	4	31998	30398	45.16	0	11	48	0	0	0	0	0	0	0	0	0	8	0	9	8	8	31	0.166667	4	0	0	4	1	31998	0	31998	0	1	0.166667	virus-like	NA	0	10	0	2	0	High-quality	94	AAI-based (high-confidence)	NA
Capsule1_15200621	266294	6108	3	2	2	31992	31192	48.92	0	11	48	0	0	0	0	0	0	0	0	0	16	0	8	16	16	24	0.333333	2	0	0	2	1	31992	0	31992	0	1	0.333333	virus-like	NA	0	13	0	0	1	High-quality	93.64	AAI-based (high-confidence)	NA
Capsule1_01111409	369905	6563	12	3	3	31986	30786	43.33	0	11	37	0	0	0	0	0	0	0	0	0	3	1	11	3	4	22	0.108108	3	0	0	3	1	31986	0	31986	0	1	0.108108	virus-like	NA	0	7	1	0	0	Medium-quality	89.3	AAI-based (high-confidence)	NA
Capsule1_01080819	231889	5680	3	1	1	31951	31551	41.01	0	11	45	0	0	0	0	0	0	0	0	0	18	2	9	18	20	16	0.444444	1	0	0	1	1	31951	0	31951	0	1	0.444444	virus-like	NA	0	9	3	3	0	High-quality	92.75	AAI-based (high-confidence)	NA
Capsule1_07221022	151717	6049	3	3	3	31906	30706	44.85	0	11	41	0	0	0	0	0	0	0	0	0	16	0	7	16	16	18	0.390244	3	0	0	3	1	31906	0	31906	0	1	0.390244	virus-like	NA	0	6	1	4	0	High-quality	99	AAI-based (high-confidence)	NA
Capsule1_01070619	173817	6412	12	3	3	31843	30643	46.12	0	11	46	0	0	0	0	0	0	0	0	0	12	2	11	12	14	21	0.304348	3	0	0	3	1	31843	0	31843	0	1	0.304348	virus-like	NA	0	13	1	0	0	High-quality	96.22	AAI-based (medium-confidence)	NA
Capsule1_06140010	161539	6326	12	3	3	31817	30617	33.36	0	11	46	0	0	0	0	0	0	0	0	0	8	0	11	8	8	27	0.173913	3	0	0	3	1	31817	0	31817	0	1	0.173913	virus-like	NA	0	8	0	0	0	Medium-quality	57.52	AAI-based (high-confidence)	NA
Capsule1_16020312	104683	5515	3	2	2	31784	30984	33.69	0	11	49	0	0	0	0	0	0	0	0	0	12	1	6	12	13	30	0.265306	2	0	0	2	1	31784	0	31784	0	1	0.265306	virus-like	NA	0	5	1	0	1	High-quality	94.82	AAI-based (high-confidence)	NA
Capsule1_15111413	446025	6495	7	5	5	33963	31963	43.14	0	11	47	0	0	0	0	0	0	0	0	0	13	1	7	13	14	26	0.297872	4	1	0	5	1	31768	2195	33963	0	1	0.297872	virus-like	NA	0	9	1	0	1	Medium-quality	84.82	AAI-based (high-confidence)	NA
Capsule1_15010614	186024	5815	12	6	6	31761	29361	51.68	0	11	35	0	0	0	0	0	0	0	0	0	10	1	9	10	11	15	0.314286	6	0	0	6	1	31761	0	31761	0	1	0.314286	virus-like	NA	0	12	0	0	0	Medium-quality	79.21	AAI-based (high-confidence)	NA
Capsule1_21191918	295613	7408	29	5	5	37954	35954	37.3	0	11	42	0	0	0	0	0	0	0	0	0	6	1	2	6	7	33	0.166667	3	2	0	5	1	31725	6229	37954	0	1	0.166667	virus-like	NA	0	3	2	0	1	Medium-quality	59	AAI-based (medium-confidence)	NA
Capsule1_23112206	376076	6220	4	2	2	31720	30920	40.94	0	11	36	0	0	0	0	0	0	0	0	0	3	1	4	3	4	28	0.111111	2	0	0	2	1	31720	0	31720	0	1	0.111111	virus-like	NA	0	4	0	1	0	High-quality	93.64	AAI-based (high-confidence)	NA
Capsule1_23190206	201339	5893	5	2	2	31657	30857	42.18	0	11	52	0	0	0	0	0	0	0	0	0	13	0	11	13	13	28	0.25	2	0	0	2	1	31657	0	31657	0	1	0.25	virus-like	NA	0	12	1	0	0	Medium-quality	89.53	AAI-based (high-confidence)	NA
Capsule1_12051500	71715	5679	5	4	4	31595	29995	44.3	0	11	41	0	0	0	0	0	0	0	0	0	8	0	10	8	8	23	0.195122	4	0	0	4	1	31595	0	31595	0	1	0.195122	virus-like	NA	1	10	0	1	0	High-quality	91.48	AAI-based (high-confidence)	NA
Capsule1_04140923	298929	6175	9	2	2	31572	30772	42.64	0	11	50	0	0	0	0	0	0	0	0	0	12	0	5	12	12	33	0.24	2	0	0	2	1	31572	0	31572	0	1	0.24	virus-like	NA	0	8	1	0	0	Medium-quality	86.54	AAI-based (high-confidence)	NA
Capsule1_16011005	112504	5869	6	2	2	31557	30757	34.6	0	11	27	0	0	0	0	0	0	0	0	0	4	1	1	4	5	21	0.185185	2	0	0	2	1	31557	0	31557	0	1	0.185185	virus-like	NA	0	2	1	0	0	Low-quality	49.23	AAI-based (medium-confidence)	NA
Capsule1_03152212	216232	5913	4	3	3	32790	31590	45.04	0	11	47	0	0	0	0	0	0	0	0	0	8	2	8	8	10	29	0.212766	2	1	0	3	1	31540	1250	32790	0	1	0.212766	virus-like	NA	0	8	0	1	0	Medium-quality	80.89	AAI-based (high-confidence)	NA
Capsule1_16072215	64919	5792	9	4	4	31496	29896	28.35	0	11	57	0	0	0	0	0	0	0	0	3	13	0	9	16	16	32	0.280702	4	0	0	4	1	31496	0	31496	0	1	0.280702	virus-like	NA	0	8	0	3	0	Medium-quality	79.95	AAI-based (high-confidence)	NA
Capsule1_12042112	133757	5805	6	3	3	31476	30276	48.39	0	11	37	0	0	0	0	0	0	0	0	0	10	0	6	10	10	21	0.27027	3	0	0	3	1	31476	0	31476	0	1	0.27027	virus-like	NA	1	7	1	1	1	Medium-quality	72.21	AAI-based (medium-confidence)	NA
Capsule1_04081800	108493	6669	20	8	8	37546	34346	49.1	0	11	45	0	0	0	0	0	0	0	0	0	13	1	6	13	14	25	0.311111	4	2	2	6	0.75	31446	3811	35257	2289	0.939035	0.331309	virus-like	NA	0	9	2	0	1	Medium-quality	64.02	AAI-based (high-confidence)	NA
Capsule1_18232200	212065	4511	16	4	4	32873	31273	49.52	0	11	39	0	0	0	0	0	0	0	0	0	8	0	17	8	8	14	0.205128	3	1	0	4	1	31410	1463	32873	0	1	0.205128	virus-like	NA	0	20	2	0	0	Medium-quality	81.9	AAI-based (high-confidence)	high kmer_freq may indicate large duplication
Capsule1_06051620	185284	5926	7	3	3	31394	30194	36.63	0	11	49	0	0	0	0	0	0	0	0	0	10	1	11	10	11	27	0.22449	3	0	0	3	1	31394	0	31394	0	1	0.22449	virus-like	NA	0	5	2	1	0	Medium-quality	85.05	AAI-based (high-confidence)	NA
Capsule1_03020622	143915	5804	4	2	2	31370	30570	32.84	0	11	35	0	0	0	0	0	0	0	0	0	3	0	16	3	3	16	0.0857143	2	0	0	2	1	31370	0	31370	0	1	0.0857143	virus-like	NA	0	15	0	1	0	Medium-quality	75.57	AAI-based (high-confidence)	NA
Capsule1_10040822	146638	6152	2	1	1	31346	30946	44.92	0	11	46	0	0	0	0	0	0	0	0	0	6	2	6	6	8	32	0.173913	1	0	0	1	1	31346	0	31346	0	1	0.173913	virus-like	NA	0	6	0	0	0	Medium-quality	88.34	AAI-based (high-confidence)	NA
Capsule1_07171712	42456	5673	7	5	5	32526	30526	32.44	0	11	48	0	0	0	0	0	0	0	0	0	16	1	8	16	17	23	0.354167	4	1	0	5	1	31302	1224	32526	0	1	0.354167	virus-like	NA	0	14	0	1	0	High-quality	91.92	AAI-based (high-confidence)	NA
Capsule1_10110909	315352	4009	11	6	6	31282	28882	33.5	0	11	48	0	0	0	0	0	0	0	0	0	13	0	5	13	13	30	0.270833	6	0	0	6	1	31282	0	31282	0	1	0.270833	virus-like	NA	0	8	0	0	1	High-quality	99.34	AAI-based (medium-confidence)	NA
Capsule1_17140518	403697	6202	6	3	3	31208	30008	37.28	0	11	52	0	0	0	0	0	0	0	0	0	14	1	8	14	15	29	0.288462	3	0	0	3	1	31208	0	31208	0	1	0.288462	virus-like	NA	0	5	3	0	0	High-quality	94.74	AAI-based (high-confidence)	NA
Capsule1_04171121	198867	6388	16	5	5	31200	29200	57.49	0	11	44	0	0	0	0	0	0	0	0	0	9	0	7	9	9	28	0.204545	5	0	0	5	1	31200	0	31200	0	1	0.204545	virus-like	NA	0	4	2	1	1	Medium-quality	57.07	HMM-based (lower-bound)	NA
Capsule1_23160916	153537	5018	18	6	6	31165	28765	33.66	0	11	34	0	0	0	0	0	0	0	0	0	10	1	3	10	11	20	0.323529	6	0	0	6	1	31165	0	31165	0	1	0.323529	virus-like	NA	0	4	2	1	0	Medium-quality	50.16	AAI-based (medium-confidence)	NA
Capsule1_09142022	133224	6201	22	10	10	36176	32176	35.31	0	11	47	0	0	0	0	0	0	0	0	1	7	0	7	8	8	32	0.170213	8	2	0	10	1	31163	5013	36176	0	1	0.170213	virus-like	NA	0	6	1	0	0	Medium-quality	58.05	AAI-based (high-confidence)	NA
Capsule1_20130815	163846	6145	8	3	3	31126	29926	44.13	0	11	51	0	0	0	0	0	0	0	0	1	5	0	10	6	6	35	0.117647	3	0	0	3	1	31126	0	31126	0	1	0.117647	virus-like	NA	1	5	0	0	0	Medium-quality	88.86	AAI-based (high-confidence)	NA
Capsule1_23202303	12641	4881	5	3	3	31100	29900	40.23	0	11	39	0	0	0	0	0	0	0	0	0	9	1	12	9	10	17	0.25641	3	0	0	3	1	31100	0	31100	0	1	0.25641	virus-like	NA	0	9	1	0	0	Medium-quality	65	AAI-based (medium-confidence)	NA
Capsule1_10231413	286250	6458	12	3	3	32364	31164	40.68	0	11	38	0	0	0	0	0	0	0	0	0	14	3	4	14	17	17	0.447368	2	1	0	3	1	31044	1320	32364	0	1	0.447368	virus-like	NA	0	2	1	0	0	Medium-quality	56.58	AAI-based (high-confidence)	NA
Capsule1_05182322	12179	5255	136	17	17	34667	27867	35.26	0	11	54	0	0	0	0	0	0	0	0	0	12	1	6	12	13	35	0.240741	14	3	0	17	1	31007	3660	34667	0	1	0.240741	virus-like	NA	0	3	1	0	1	Medium-quality	59.99	AAI-based (high-confidence)	NA
Capsule1_10011712	179294	6727	16	3	3	33228	32028	51.33	0	11	50	0	0	0	0	0	0	0	0	0	5	0	6	5	5	39	0.1	2	1	0	3	1	30960	2268	33228	0	1	0.1	virus-like	NA	0	7	0	0	1	Low-quality	33.88	AAI-based (medium-confidence)	NA
Capsule1_07122122	75028	5530	5	4	4	30949	29349	34.65	0	11	51	0	0	0	0	0	0	0	0	0	8	2	15	8	10	26	0.196078	4	0	0	4	1	30949	0	30949	0	1	0.196078	virus-like	NA	0	12	0	2	1	Medium-quality	75.4	AAI-based (medium-confidence)	NA
Capsule1_19110110	119613	6120	19	4	4	32078	30478	40.44	0	11	40	0	0	0	0	0	0	0	0	0	13	1	3	13	14	23	0.35	3	1	0	4	1	30934	1144	32078	0	1	0.35	virus-like	NA	0	4	0	0	0	Medium-quality	54.73	AAI-based (high-confidence)	NA
Capsule1_02051906	172905	6323	11	2	2	30912	30112	46.02	0	11	44	0	0	0	0	0	0	0	0	0	8	1	4	8	9	31	0.204545	2	0	0	2	1	30912	0	30912	0	1	0.204545	virus-like	NA	0	5	3	0	0	Medium-quality	84.39	AAI-based (medium-confidence)	NA
Capsule1_18131515	208099	5949	5	3	3	33106	31906	36.44	0	11	51	0	0	0	0	0	0	0	0	0	11	2	8	11	13	30	0.254902	2	1	0	3	1	30791	1230	32021	0	0.967226	0.263539	virus-like	NA	0	12	0	0	1	Low-quality	43.35	HMM-based (lower-bound)	NA
Capsule1_01112213	278837	5624	9	3	3	30773	29573	41.31	0	11	51	0	0	0	0	0	0	0	0	0	10	1	6	10	11	34	0.215686	3	0	0	3	1	30773	0	30773	0	1	0.215686	virus-like	NA	0	6	0	0	0	Low-quality	44.8	AAI-based (high-confidence)	NA
Capsule1_14232110	457092	6138	19	9	9	35587	31987	44.2	0	11	55	0	0	0	0	0	0	0	0	0	24	2	5	24	26	24	0.472727	7	1	1	8	0.888889	30770	3796	34566	1021	0.97131	0.486691	virus-like	NA	2	6	3	1	0	Medium-quality	68.62	AAI-based (high-confidence)	NA
Capsule1_14230508	200551	7324	9	5	5	39586	37586	48.28	0	11	36	0	0	0	0	0	0	0	0	1	5	4	3	6	10	23	0.277778	4	1	0	5	1	30767	8819	39586	0	1	0.277778	virus-like	NA	0	2	2	1	0	Medium-quality	66.94	AAI-based (medium-confidence)	NA
Capsule1_06222015	304086	5532	10	3	3	30759	29559	37.95	0	11	46	0	0	0	0	0	0	0	0	0	5	1	12	5	6	28	0.130435	3	0	0	3	1	30759	0	30759	0	1	0.130435	virus-like	NA	0	7	0	0	1	Medium-quality	82.8	AAI-based (medium-confidence)	NA
Capsule1_18050003	343017	6034	7	4	4	30655	29055	42.56	0	11	45	0	0	0	0	0	0	0	0	0	11	1	7	11	12	26	0.266667	4	0	0	4	1	30655	0	30655	0	1	0.266667	virus-like	NA	0	8	1	0	1	Medium-quality	84.26	AAI-based (high-confidence)	NA
Capsule1_14230300	130690	5584	13	4	4	30606	29006	39.07	0	11	57	0	0	0	0	0	0	0	0	0	12	1	9	12	13	35	0.22807	4	0	0	4	1	30606	0	30606	0	1	0.22807	virus-like	NA	0	9	0	0	0	Low-quality	46.21	AAI-based (high-confidence)	NA
Capsule1_05021418	359913	6119	8	2	2	30600	29800	47.07	0	11	43	0	0	0	0	0	0	0	0	0	5	0	9	5	5	29	0.116279	2	0	0	2	1	30600	0	30600	0	1	0.116279	virus-like	NA	0	9	4	0	0	Low-quality	47.42	HMM-based (lower-bound)	NA
Capsule1_01021913	396392	6217	6	3	3	30521	29321	43.38	0	11	41	0	0	0	0	0	0	0	0	0	9	1	10	9	10	21	0.243902	3	0	0	3	1	30521	0	30521	0	1	0.243902	virus-like	NA	0	9	1	1	1	Medium-quality	80.8	AAI-based (high-confidence)	NA
Capsule1_14052121	338873	15786	60	20	20	90934	82934	42.11	0	11	115	0	0	0	0	0	0	0	0	3	17	5	9	20	25	81	0.217391	5	7	8	12	0.6	30496	48333	78829	12105	0.866881	0.250774	virus-like	NA	0	6	5	1	2	Low-quality	43.58	AAI-based (high-confidence)	NA
Capsule1_20050506	264285	6208	12	3	3	30496	29296	45.4	0	11	28	0	0	0	0	0	0	0	0	0	4	1	16	4	5	7	0.178571	3	0	0	3	1	30496	0	30496	0	1	0.178571	virus-like	NA	0	8	0	1	0	Medium-quality	75.78	AAI-based (high-confidence)	NA
Capsule1_18041503	41339	4946	22	7	7	30478	27678	32.82	0	11	42	0	0	0	0	0	0	0	0	0	11	2	1	11	13	28	0.309524	7	0	0	7	1	30478	0	30478	0	1	0.309524	virus-like	NA	0	5	2	0	1	Low-quality	47.44	AAI-based (high-confidence)	NA
Capsule1_01160912	99621	5791	24	9	9	36633	33033	35.12	0	11	65	0	0	0	0	0	0	0	0	0	6	2	1	6	8	56	0.123077	4	3	2	7	0.777778	30476	3481	33957	2676	0.926951	0.132776	virus-like	NA	0	1	2	0	0	Medium-quality	55.08	AAI-based (high-confidence)	NA
Capsule1_03070016	170788	5585	10	4	4	30472	28872	37.81	0	11	52	0	0	0	0	0	0	0	0	0	17	0	6	17	17	29	0.326923	4	0	0	4	1	30472	0	30472	0	1	0.326923	virus-like	NA	1	10	2	2	0	Medium-quality	80.94	AAI-based (high-confidence)	NA
Capsule1_12170516	65932	5810	19	10	10	34968	30968	41.36	0	11	37	0	0	0	0	0	0	0	0	1	6	0	9	7	7	21	0.189189	7	2	1	9	0.9	30471	3289	33760	1208	0.965454	0.195959	virus-like	NA	0	6	2	0	0	Medium-quality	61.71	AAI-based (medium-confidence)	NA
Capsule1_20212020	181383	5864	9	4	4	31608	30008	42.21	0	11	38	0	0	0	0	0	0	0	0	1	5	0	10	6	6	22	0.157895	3	1	0	4	1	30462	1146	31608	0	1	0.157895	virus-like	NA	0	5	1	0	0	Medium-quality	58.88	AAI-based (medium-confidence)	NA
Capsule1_08021610	286609	7408	20	10	10	43231	39231	32.72	0	11	72	0	0	0	0	0	0	0	0	0	17	3	15	17	20	37	0.277778	4	2	4	6	0.6	30426	6456	36882	6349	0.853138	0.325595	virus-like	NA	0	8	2	2	0	Medium-quality	59.28	AAI-based (high-confidence)	NA
Capsule1_03110808	129106	6878	18	4	4	34264	32664	47.94	0	11	34	0	0	0	0	0	0	0	0	0	12	0	5	12	12	17	0.352941	3	1	0	4	1	30419	3845	34264	0	1	0.352941	virus-like	NA	0	4	0	0	0	Medium-quality	63.24	AAI-based (high-confidence)	NA
Capsule1_08042115	264093	6659	17	5	5	34021	32021	36.36	0	11	33	0	0	0	0	0	0	0	0	0	5	0	3	5	5	25	0.151515	3	2	0	5	1	30413	3608	34021	0	1	0.151515	virus-like	NA	0	3	0	1	0	Medium-quality	55.76	AAI-based (medium-confidence)	NA
Capsule1_08141016	118974	4885	4	3	3	30412	29212	48.96	0	11	45	0	0	0	0	0	0	0	0	0	4	1	6	4	5	34	0.111111	3	0	0	3	1	30412	0	30412	0	1	0.111111	virus-like	NA	0	2	2	1	0	Medium-quality	70.04	AAI-based (medium-confidence)	NA
Capsule1_16010207	148132	5840	6	2	2	30370	29570	33.12	0	11	50	0	0	0	0	0	0	0	0	1	8	1	6	9	10	34	0.2	2	0	0	2	1	30370	0	30370	0	1	0.2	virus-like	NA	1	6	0	1	1	Medium-quality	81.26	AAI-based (medium-confidence)	NA
Capsule1_05231317	257660	6918	21	7	7	35982	33182	39.05	0	11	44	0	0	0	0	0	0	0	0	0	6	1	9	6	7	28	0.159091	5	2	0	7	1	30349	5633	35982	0	1	0.159091	virus-like	NA	0	5	0	2	0	Medium-quality	65.62	AAI-based (high-confidence)	NA
Capsule1_06222321	274439	6754	25	5	5	35394	33394	48.97	0	11	49	0	0	0	0	0	0	0	0	0	14	0	6	14	14	29	0.285714	3	2	0	5	1	30348	5046	35394	0	1	0.285714	virus-like	NA	1	6	0	3	0	High-quality	100	AAI-based (high-confidence)	NA
Capsule1_19021903	217163	5741	2	1	1	30314	29914	32.96	0	11	48	0	0	0	0	0	0	0	0	1	13	0	6	14	14	28	0.291667	1	0	0	1	1	30314	0	30314	0	1	0.291667	virus-like	NA	0	5	1	0	1	Complete	100	DTR (high-confidence)	NA
Capsule1_23170016	68762	4891	26	9	9	34638	31038	33.63	0	11	43	0	0	0	0	0	0	0	0	0	5	0	7	5	5	31	0.116279	5	3	1	8	0.888889	30289	3323	33612	1026	0.970379	0.119828	virus-like	NA	0	6	2	0	0	Low-quality	28.22	AAI-based (high-confidence)	NA
Capsule1_18140812	167619	5648	12	6	6	32291	29891	35.63	0	11	31	0	0	0	0	0	0	0	0	0	5	1	13	5	6	12	0.193548	5	1	0	6	1	30262	2029	32291	0	1	0.193548	virus-like	NA	0	7	0	0	0	Medium-quality	63.2	AAI-based (high-confidence)	NA
Capsule1_12020713	127873	6467	22	8	8	31436	28236	36.91	0	11	42	0	0	0	0	0	0	0	0	0	13	1	5	13	14	23	0.333333	7	1	0	8	1	30251	1185	31436	0	1	0.333333	virus-like	NA	0	3	1	0	1	Medium-quality	53.57	AAI-based (high-confidence)	NA
Capsule1_12200600	144270	5440	7	3	3	30203	29003	35.02	0	11	56	0	0	0	0	0	0	0	0	1	7	0	1	8	8	47	0.142857	3	0	0	3	1	30203	0	30203	0	1	0.142857	virus-like	NA	0	0	0	0	1	Medium-quality	89.88	AAI-based (high-confidence)	NA
Capsule1_15101514	172306	6204	8	2	2	30180	29380	41.71	0	11	41	0	0	0	0	0	0	0	0	0	4	1	14	4	5	22	0.121951	2	0	0	2	1	30180	0	30180	0	1	0.121951	virus-like	NA	0	9	2	0	0	Medium-quality	74.25	AAI-based (high-confidence)	NA
Capsule1_23210006	144127	6066	6	2	2	32671	31871	33.12	0	11	54	0	0	0	0	0	0	0	0	1	6	1	9	7	8	37	0.148148	1	1	0	2	1	30165	2506	32671	0	1	0.148148	virus-like	NA	0	6	1	2	1	Low-quality	25.5	HMM-based (lower-bound)	NA
Capsule1_10202118	412380	6093	5	3	3	30159	28959	43.39	0	11	38	0	0	0	0	0	0	0	0	0	10	0	7	10	10	21	0.263158	3	0	0	3	1	30159	0	30159	0	1	0.263158	virus-like	NA	0	6	2	1	0	Medium-quality	84.98	AAI-based (high-confidence)	NA
Capsule1_14082115	197195	4750	22	4	4	31656	30056	35.5	0	11	51	0	0	0	0	0	0	0	0	1	9	0	8	10	10	33	0.196078	3	1	0	4	1	30140	1516	31656	0	1	0.196078	virus-like	NA	0	4	4	0	0	Medium-quality	50.48	AAI-based (high-confidence)	NA
Capsule1_06050206	250413	5678	6	4	4	30088	28488	29.48	0	11	47	0	0	0	0	0	0	0	0	0	9	1	11	9	10	26	0.212766	4	0	0	4	1	30088	0	30088	0	1	0.212766	virus-like	NA	0	6	0	3	2	Medium-quality	81.62	AAI-based (medium-confidence)	NA
Capsule1_15080718	221023	5341	4	3	3	34869	33669	37.44	0	11	50	0	0	0	0	0	0	0	0	0	3	2	4	3	5	41	0.1	2	1	0	3	1	30080	4789	34869	0	1	0.1	virus-like	NA	0	1	1	0	0	High-quality	96.6	AAI-based (high-confidence)	NA
Capsule1_07052320	93292	5183	8	4	4	31860	30260	47.87	0	11	50	0	0	0	0	0	0	0	0	0	16	0	11	16	16	23	0.32	3	1	0	4	1	30068	1792	31860	0	1	0.32	virus-like	NA	1	12	1	0	0	Medium-quality	83.04	AAI-based (medium-confidence)	NA
Capsule1_01190617	172540	5745	22	6	6	36440	34040	45.64	0	11	31	0	0	0	0	0	0	0	0	0	5	1	5	5	6	20	0.193548	3	3	0	6	1	30028	6412	36440	0	1	0.193548	virus-like	NA	0	2	1	1	0	Medium-quality	53.67	AAI-based (high-confidence)	NA
Capsule1_07170107	83835	6442	18	7	7	36316	33516	30.7	0	11	32	0	0	0	0	0	0	0	0	0	5	0	2	5	5	25	0.15625	5	2	0	7	1	30001	6315	36316	0	1	0.15625	virus-like	NA	0	6	0	0	1	Low-quality	32.74	AAI-based (high-confidence)	NA
Capsule1_06182303	230258	5976	17	6	6	33605	31205	55.83	0	11	56	0	0	0	0	0	0	0	0	0	10	0	3	10	10	43	0.178571	4	0	2	4	0.666667	29988	0	29988	3617	0.892367	0.20011	virus-like	NA	1	3	0	0	0	Medium-quality	70.26	AAI-based (high-confidence)	NA
Capsule1_09182109	139232	3763	8	5	5	29953	27953	31.33	0	11	49	0	0	0	0	0	0	0	0	0	18	1	10	18	19	20	0.387755	5	0	0	5	1	29953	0	29953	0	1	0.387755	virus-like	NA	1	9	1	0	0	Medium-quality	85.43	AAI-based (high-confidence)	NA
Capsule1_23112118	269433	5797	14	3	3	29923	28723	47.34	0	11	40	0	0	0	0	0	0	0	0	0	5	0	13	5	5	22	0.125	3	0	0	3	1	29923	0	29923	0	1	0.125	virus-like	NA	0	12	0	0	0	Medium-quality	78.34	AAI-based (high-confidence)	NA
Capsule1_21230616	131841	7308	13	6	6	48177	45777	43.92	0	11	79	0	0	0	0	0	0	0	0	0	15	1	6	15	16	57	0.202532	5	1	0	6	1	29913	18264	48177	0	1	0.202532	virus-like	NA	0	5	1	1	2	Medium-quality	74.58	AAI-based (high-confidence)	NA
Capsule1_21100813	415035	5982	3	1	1	29897	29497	49.04	0	11	41	0	0	0	0	0	0	0	0	0	13	0	8	13	13	20	0.317073	1	0	0	1	1	29897	0	29897	0	1	0.317073	virus-like	NA	0	12	0	1	1	Medium-quality	87.42	AAI-based (high-confidence)	NA
Capsule1_03022015	210875	5010	23	4	4	30832	29232	40.5	0	11	48	0	0	0	0	0	0	0	0	0	9	0	15	9	9	24	0.1875	3	1	0	4	1	29830	1002	30832	0	1	0.1875	virus-like	NA	0	13	0	0	0	Medium-quality	76.71	AAI-based (high-confidence)	NA
Capsule1_15230318	191381	6137	17	6	6	32819	30419	32.23	0	11	45	0	0	0	0	0	0	0	0	0	8	1	3	8	9	33	0.2	4	2	0	6	1	29825	2994	32819	0	1	0.2	virus-like	NA	0	5	2	0	0	Low-quality	49.88	AAI-based (high-confidence)	NA
Capsule1_19111907	417512	5178	13	7	7	33605	30805	41.49	0	11	57	0	0	0	0	0	0	0	0	0	14	3	7	14	17	33	0.298246	4	2	1	6	0.857143	29825	2707	32532	1073	0.96807	0.308083	virus-like	NA	0	6	6	0	0	Medium-quality	89.35	AAI-based (high-confidence)	NA
Capsule1_03221106	114588	4839	13	6	6	29784	27384	31.23	0	11	53	0	0	0	0	0	0	0	0	0	16	0	7	16	16	30	0.301887	6	0	0	6	1	29784	0	29784	0	1	0.301887	virus-like	NA	0	8	0	1	2	High-quality	91.8	AAI-based (high-confidence)	NA
Capsule1_17040923	236330	6250	13	7	7	31982	29182	43.85	0	11	49	0	0	0	0	0	0	0	0	0	14	1	9	14	15	25	0.306122	5	2	0	7	1	29769	2213	31982	0	1	0.306122	virus-like	NA	0	12	1	1	0	Medium-quality	86.83	AAI-based (high-confidence)	NA
Capsule1_02132000	114947	5180	5	2	2	29727	28927	32.63	0	11	54	0	0	0	0	0	0	0	0	0	15	0	9	15	15	30	0.277778	2	0	0	2	1	29727	0	29727	0	1	0.277778	virus-like	NA	0	7	0	3	0	Medium-quality	85.93	AAI-based (high-confidence)	NA
Capsule1_03021408	69498	6870	14	5	5	33023	31023	54.12	0	11	47	0	0	0	0	0	0	0	0	0	7	2	4	7	9	34	0.191489	4	1	0	5	1	29696	3327	33023	0	1	0.191489	virus-like	NA	0	6	2	0	0	Medium-quality	79.93	AAI-based (high-confidence)	NA
Capsule1_13081512	90751	4091	9	4	4	29645	28045	49.02	0	11	25	0	0	0	0	0	0	0	0	0	12	0	4	12	12	9	0.48	4	0	0	4	1	29645	0	29645	0	1	0.48	virus-like	NA	0	10	1	0	0	Medium-quality	79.96	AAI-based (medium-confidence)	NA
Capsule1_23231200	162147	5144	10	5	5	29637	27637	42.1	0	11	49	0	0	0	0	0	0	0	0	0	17	0	5	17	17	27	0.346939	5	0	0	5	1	29637	0	29637	0	1	0.346939	virus-like	NA	2	7	3	3	1	High-quality	90.82	AAI-based (high-confidence)	NA
Capsule1_17070609	208004	5756	3	1	1	29631	29231	34.83	0	11	48	0	0	0	0	0	0	0	0	0	13	1	11	13	14	23	0.291667	1	0	0	1	1	29631	0	29631	0	1	0.291667	virus-like	NA	0	5	3	3	0	High-quality	91.88	AAI-based (medium-confidence)	NA
Capsule1_18041712	163067	5466	7	2	2	30842	30042	48.23	0	11	57	0	0	0	0	0	0	0	0	0	15	1	8	15	16	33	0.280702	1	1	0	2	1	29573	1269	30842	0	1	0.280702	virus-like	NA	0	9	1	0	0	High-quality	94.64	AAI-based (high-confidence)	NA
Capsule1_19231017	48141	5199	7	3	3	29507	28307	36.32	0	11	26	0	0	0	0	0	0	0	0	0	6	2	3	6	8	15	0.307692	3	0	0	3	1	29507	0	29507	0	1	0.307692	virus-like	NA	0	3	2	0	0	Medium-quality	54.58	AAI-based (high-confidence)	NA
Capsule1_06071722	143965	5802	14	4	4	31018	29418	42.39	0	11	57	0	0	0	0	0	0	0	0	1	10	0	9	11	11	37	0.192982	3	1	0	4	1	29490	1528	31018	0	1	0.192982	virus-like	NA	2	12	0	0	0	Medium-quality	70.82	AAI-based (medium-confidence)	NA
Capsule1_10140610	161716	4795	6	5	5	32629	30629	40.45	0	11	61	0	0	0	0	0	0	0	0	0	8	2	5	8	10	46	0.163934	3	2	0	5	1	29473	3156	32629	0	1	0.163934	virus-like	NA	0	3	4	2	0	High-quality	90.6	AAI-based (high-confidence)	NA
Capsule1_03100922	162294	6054	20	8	8	36050	32850	34.18	0	11	48	0	0	0	0	0	0	0	0	0	7	1	2	7	8	38	0.166667	7	1	0	8	1	29444	5925	35369	0	0.98111	0.169876	virus-like	NA	0	2	1	1	1	Medium-quality	58.66	AAI-based (high-confidence)	NA
Capsule1_21222010	188225	6337	19	6	6	35035	32635	35.68	0	11	66	0	0	0	0	0	0	0	0	1	9	1	3	10	11	52	0.166667	4	2	0	6	1	29410	5625	35035	0	1	0.166667	virus-like	NA	0	6	1	0	0	Medium-quality	55.53	AAI-based (high-confidence)	NA
Capsule1_00190512	171534	5928	12	4	4	31470	29870	45.47	0	11	36	0	0	0	0	0	0	0	0	0	5	1	20	5	6	10	0.166667	3	1	0	4	1	29363	2107	31470	0	1	0.166667	virus-like	NA	0	9	0	1	1	Medium-quality	78.21	AAI-based (high-confidence)	NA
Capsule1_09111815	139658	5245	2	1	1	29308	28908	31.36	0	11	61	0	0	0	0	0	0	0	0	0	14	1	8	14	15	38	0.245902	1	0	0	1	1	29308	0	29308	0	1	0.245902	virus-like	NA	0	9	0	0	0	Medium-quality	78.06	AAI-based (high-confidence)	NA
Capsule1_01202121	16152	5342	30	8	8	35406	32206	46.82	0	11	37	0	0	0	0	0	0	0	0	0	2	0	4	2	2	31	0.0540541	5	3	0	8	1	29246	5688	34934	0	0.986669	0.0547844	virus-like	NA	0	4	0	0	1	Medium-quality	65.34	AAI-based (medium-confidence)	NA
Capsule1_12230614	93020	6086	26	8	8	32606	29406	37.99	0	11	34	0	0	0	0	0	0	0	0	0	6	1	2	6	7	25	0.205882	6	1	1	7	0.875	29239	1892	31131	1475	0.954763	0.215637	virus-like	NA	0	4	1	0	0	Medium-quality	51.25	AAI-based (high-confidence)	NA
Capsule1_18061004	116815	5358	10	4	4	29219	27619	32.66	0	11	29	0	0	0	0	0	0	0	0	0	6	1	10	6	7	12	0.241379	4	0	0	4	1	29219	0	29219	0	1	0.241379	virus-like	NA	0	7	0	0	0	Medium-quality	56.11	AAI-based (high-confidence)	NA
Capsule1_10170209	475240	5595	11	6	6	32122	29722	40.34	0	11	49	0	0	0	0	0	0	0	0	0	9	1	9	9	10	30	0.204082	5	1	0	6	1	29192	2930	32122	0	1	0.204082	virus-like	NA	0	8	0	0	0	Medium-quality	79.34	AAI-based (high-confidence)	NA
Capsule1_18170516	111258	5587	5	3	3	30748	29548	38.28	0	11	55	0	0	0	0	0	0	0	0	0	22	0	8	22	22	25	0.4	3	0	0	3	1	29168	0	29168	0	0.948615	0.421668	virus-like	NA	0	10	0	0	1	Medium-quality	76.55	AAI-based (medium-confidence)	NA
Capsule1_05220811	211480	5201	16	5	5	29048	27048	37.07	0	11	43	0	0	0	0	0	0	0	0	1	20	0	7	21	21	15	0.488372	5	0	0	5	1	29048	0	29048	0	1	0.488372	virus-like	NA	0	6	0	0	1	High-quality	92.02	AAI-based (high-confidence)	NA
Capsule1_23171717	290626	5780	2	1	1	29034	28634	48.82	0	11	38	0	0	0	0	0	0	0	0	0	6	1	7	6	7	24	0.184211	1	0	0	1	1	29034	0	29034	0	1	0.184211	virus-like	NA	0	5	0	0	0	Medium-quality	79.6	AAI-based (high-confidence)	NA
Capsule1_00112322	252385	6680	10	5	5	31380	29380	45.44	0	11	37	0	0	0	0	0	0	0	0	0	4	2	19	4	6	12	0.162162	4	1	0	5	1	28978	2402	31380	0	1	0.162162	virus-like	NA	0	11	0	0	1	Medium-quality	75.05	AAI-based (high-confidence)	NA
Capsule1_16201515	43099	3683	12	6	6	28899	26499	34.13	0	11	53	0	0	0	0	0	0	0	0	0	10	2	7	10	12	34	0.226415	6	0	0	6	1	28899	0	28899	0	1	0.226415	virus-like	NA	0	5	2	1	0	High-quality	92.18	AAI-based (high-confidence)	NA
Capsule1_02132122	131811	6140	7	4	4	31739	30139	32.23	0	11	50	0	0	0	0	0	0	0	0	0	17	0	7	17	17	26	0.34	3	0	1	3	0.75	28878	0	28878	2861	0.909859	0.373684	virus-like	NA	0	9	0	2	0	Medium-quality	77.19	AAI-based (high-confidence)	NA
Capsule1_03050623	228737	6037	15	4	4	33065	31465	36.97	0	11	41	0	0	0	0	0	0	0	0	0	12	1	6	12	13	22	0.317073	3	1	0	4	1	28851	4214	33065	0	1	0.317073	virus-like	NA	0	9	5	1	0	Medium-quality	87.32	AAI-based (medium-confidence)	NA
Capsule1_08051320	229320	5845	5	3	3	30313	29113	43.69	0	11	48	0	0	0	0	0	0	0	0	0	5	1	5	5	6	37	0.125	2	1	0	3	1	28830	1483	30313	0	1	0.125	virus-like	NA	0	2	2	0	1	Medium-quality	85.11	AAI-based (high-confidence)	NA
Capsule1_08201411	82944	4216	16	6	6	29984	27584	28.52	0	11	53	0	0	0	0	0	0	0	0	3	8	1	5	11	12	36	0.226415	5	1	0	6	1	28801	1183	29984	0	1	0.226415	virus-like	NA	0	5	0	5	0	Medium-quality	76.52	AAI-based (high-confidence)	NA
Capsule1_10230713	572688	5699	13	3	3	28800	27600	55.65	0	11	46	0	0	0	0	0	0	0	0	0	14	1	4	14	15	27	0.326087	3	0	0	3	1	28800	0	28800	0	1	0.326087	virus-like	NA	1	3	2	0	0	Medium-quality	78.7	AAI-based (high-confidence)	NA
Capsule1_06141507	79460	4914	37	7	7	35443	32643	61.47	0	11	55	0	0	0	0	0	0	0	0	0	5	4	4	5	9	42	0.163636	2	4	1	6	0.857143	28799	4752	33551	1892	0.946619	0.172864	virus-like	NA	0	4	1	2	0	Low-quality	40.94	HMM-based (lower-bound)	NA
Capsule1_14001903	181528	5392	4	2	2	28736	27936	31.54	0	11	33	0	0	0	0	0	0	0	0	0	12	0	4	12	12	17	0.363636	2	0	0	2	1	28736	0	28736	0	1	0.363636	virus-like	NA	0	9	0	0	0	Medium-quality	80.95	AAI-based (high-confidence)	NA
Capsule1_02171503	286663	5890	3	2	2	28653	27853	54.15	0	11	43	0	0	0	0	0	0	0	0	0	10	2	10	10	12	21	0.27907	2	0	0	2	1	28653	0	28653	0	1	0.27907	virus-like	NA	0	10	0	1	0	Medium-quality	86.83	AAI-based (medium-confidence)	NA
Capsule1_16171215	74816	5095	24	4	4	28614	27014	37.68	0	11	23	0	0	0	0	0	0	0	0	0	5	2	2	5	7	14	0.304348	4	0	0	4	1	28614	0	28614	0	1	0.304348	virus-like	NA	0	2	0	1	0	Medium-quality	51.37	AAI-based (medium-confidence)	NA
Capsule1_16232316	23270	5179	30	9	9	32636	29036	36.7	0	11	46	0	0	0	0	0	0	0	0	0	4	3	8	4	7	31	0.152174	6	2	1	8	0.888889	28593	2812	31405	1231	0.962281	0.158139	virus-like	NA	1	8	2	0	0	Low-quality	17.66	AAI-based (medium-confidence)	NA
Capsule1_16210004	24433	4841	4	2	2	28569	27769	33.7	0	11	46	0	0	0	0	0	0	0	0	0	12	2	4	12	14	28	0.304348	2	0	0	2	1	28569	0	28569	0	1	0.304348	virus-like	NA	0	5	1	0	1	Medium-quality	84.5	AAI-based (high-confidence)	NA
Capsule1_05042313	422098	6056	6	2	2	28564	27764	52	0	11	41	0	0	0	0	0	0	0	0	0	13	1	7	13	14	20	0.341463	2	0	0	2	1	28564	0	28564	0	1	0.341463	virus-like	NA	2	10	1	1	0	Medium-quality	87.79	AAI-based (high-confidence)	NA
Capsule1_12080006	110768	5107	6	3	3	29847	28647	50.89	0	11	32	0	0	0	0	0	0	0	0	0	5	0	0	5	5	27	0.15625	2	1	0	3	1	28443	1404	29847	0	1	0.15625	virus-like	NA	1	1	0	0	0	Medium-quality	77.5	AAI-based (high-confidence)	NA
Capsule1_16232211	58313	5545	11	6	6	31923	29523	32.29	0	11	33	0	0	0	0	0	0	0	0	1	4	0	3	5	5	25	0.151515	4	2	0	6	1	28425	3498	31923	0	1	0.151515	virus-like	NA	0	5	1	0	0	Low-quality	47.13	AAI-based (medium-confidence)	NA
Capsule1_16110612	40589	5086	4	3	3	28421	27221	31.76	0	11	47	0	0	0	0	0	0	0	0	1	12	0	8	13	13	26	0.276596	3	0	0	3	1	28421	0	28421	0	1	0.276596	virus-like	NA	0	7	1	2	1	Medium-quality	88.8	AAI-based (high-confidence)	NA
Capsule1_10191822	323477	4780	9	5	5	28283	26283	37.3	0	11	46	0	0	0	0	0	0	0	0	0	12	0	6	12	12	28	0.26087	5	0	0	5	1	28283	0	28283	0	1	0.26087	virus-like	NA	0	5	1	1	0	Medium-quality	86.07	AAI-based (high-confidence)	NA
Capsule1_23000103	187007	6224	8	3	3	30167	28967	56.06	0	11	46	0	0	0	0	0	0	0	0	0	10	0	4	10	10	32	0.217391	2	1	0	3	1	28251	1916	30167	0	1	0.217391	virus-like	NA	0	3	2	0	1	Medium-quality	53.99	AAI-based (medium-confidence)	NA
Capsule1_04171905	141908	5611	6	3	3	28160	26960	45.14	0	11	36	0	0	0	0	0	0	0	0	1	6	1	5	7	8	23	0.222222	3	0	0	3	1	28160	0	28160	0	1	0.222222	virus-like	NA	0	8	1	0	0	Medium-quality	82.56	AAI-based (high-confidence)	NA
Capsule1_12201619	141195	5199	4	1	1	28096	27696	40.61	0	11	26	0	0	0	0	0	0	0	0	0	1	4	5	1	5	16	0.192308	1	0	0	1	1	28096	0	28096	0	1	0.192308	virus-like	NA	0	0	0	2	1	Complete	100	DTR (high-confidence)	NA
Capsule1_17051308	52628	5320	19	10	10	34078	30078	36.06	0	11	45	0	0	0	0	0	0	0	0	0	5	2	3	5	7	35	0.155556	6	4	0	10	1	28091	5987	34078	0	1	0.155556	virus-like	NA	1	2	1	0	1	Medium-quality	55.58	AAI-based (high-confidence)	NA
Capsule1_02022115	163154	5450	13	5	5	30569	28569	36.35	0	11	29	0	0	0	0	0	0	0	0	0	1	3	7	1	4	18	0.137931	4	1	0	5	1	28063	2506	30569	0	1	0.137931	virus-like	NA	1	2	0	0	0	High-quality	100	AAI-based (medium-confidence)	NA
Capsule1_19031003	247129	5488	16	7	7	33680	30880	34.87	0	11	44	0	0	0	0	0	0	0	0	0	9	2	11	9	11	22	0.25	4	2	1	6	0.857143	28061	3168	31229	2451	0.927227	0.269621	virus-like	NA	1	14	0	0	0	High-quality	90.18	AAI-based (high-confidence)	NA
Capsule1_10222112	115006	4496	14	5	5	28054	26054	41.92	0	11	50	0	0	0	0	0	0	0	0	0	15	3	3	15	18	29	0.36	5	0	0	5	1	28054	0	28054	0	1	0.36	virus-like	NA	0	9	2	0	0	Medium-quality	76.74	AAI-based (high-confidence)	NA
Capsule1_09050422	137435	5272	23	6	6	31242	28842	37.28	0	11	53	0	0	0	0	0	0	0	0	0	4	0	8	4	4	41	0.0754717	5	1	0	6	1	27986	3256	31242	0	1	0.0754717	virus-like	NA	0	2	2	0	0	Medium-quality	56.69	AAI-based (high-confidence)	NA
Capsule1_09220613	423955	4570	4	3	3	27958	26758	39.28	0	11	47	0	0	0	0	0	0	0	0	0	11	1	6	11	12	29	0.255319	3	0	0	3	1	27958	0	27958	0	1	0.255319	virus-like	NA	0	7	3	1	1	Medium-quality	86.14	AAI-based (medium-confidence)	NA
Capsule1_01161606	203245	5393	3	1	1	27952	27552	33.13	0	11	42	0	0	0	0	0	0	0	0	0	17	0	7	17	17	18	0.404762	1	0	0	1	1	27952	0	27952	0	1	0.404762	virus-like	NA	0	14	0	1	0	High-quality	93.81	AAI-based (medium-confidence)	NA
Capsule1_18060321	157911	5444	8	1	1	27942	27542	53.5	0	11	34	0	0	0	0	0	0	0	0	0	15	2	3	15	17	14	0.5	1	0	0	1	1	27942	0	27942	0	1	0.5	virus-like	NA	1	7	1	1	0	Medium-quality	81.34	AAI-based (high-confidence)	NA
Capsule1_01112016	6552	2933	22	6	6	27905	25505	36.14	0	11	43	0	0	0	0	0	0	0	0	0	2	2	9	2	4	30	0.0930233	6	0	0	6	1	27905	0	27905	0	1	0.0930233	virus-like	NA	0	3	0	0	0	Medium-quality	54.62	AAI-based (high-confidence)	NA
Capsule1_15172312	90405	5558	9	4	4	27757	26157	30.36	0	11	56	0	0	0	0	0	0	0	0	2	7	0	7	9	9	40	0.160714	4	0	0	4	1	27757	0	27757	0	1	0.160714	virus-like	NA	0	8	0	3	0	Medium-quality	86.07	AAI-based (high-confidence)	NA
Capsule1_03142319	85023	4520	11	5	5	29253	27253	35.56	0	11	40	0	0	0	0	0	0	0	0	0	11	1	6	11	12	22	0.3	4	1	0	5	1	27744	1509	29253	0	1	0.3	virus-like	NA	0	4	4	0	0	Low-quality	46.4	AAI-based (high-confidence)	NA
Capsule1_20071014	150740	5366	3	2	2	27737	26937	32.9	0	11	51	0	0	0	0	0	0	0	0	0	16	0	4	16	16	31	0.313725	2	0	0	2	1	27737	0	27737	0	1	0.313725	virus-like	NA	0	9	0	0	0	Medium-quality	77.83	AAI-based (medium-confidence)	NA
Capsule1_18230621	270137	5374	21	5	5	27736	25736	46.87	0	11	53	0	0	0	0	0	0	0	0	0	13	2	11	13	15	27	0.283019	5	0	0	5	1	27736	0	27736	0	1	0.283019	virus-like	NA	0	10	1	1	1	Medium-quality	62.86	AAI-based (high-confidence)	low-confidence ITR
Capsule1_10100300	275624	5636	4	3	3	29394	28194	33.63	0	11	46	0	0	0	0	0	0	0	0	0	15	2	5	15	17	24	0.369565	2	1	0	3	1	27718	1676	29394	0	1	0.369565	virus-like	NA	0	5	3	0	2	Medium-quality	84.88	AAI-based (medium-confidence)	NA
Capsule1_20141114	273551	5543	4	1	1	27686	27286	45.17	0	11	32	0	0	0	0	0	0	0	0	0	6	1	15	6	7	10	0.21875	1	0	0	1	1	27686	0	27686	0	1	0.21875	virus-like	NA	0	8	0	1	1	Medium-quality	68.83	AAI-based (high-confidence)	NA
Capsule1_02122314	112694	6147	16	8	8	35568	32368	36.81	0	11	42	0	0	0	0	0	0	0	0	0	7	1	3	7	8	31	0.190476	5	2	1	7	0.875	27668	6888	34556	1012	0.971547	0.196054	virus-like	NA	0	4	1	1	0	Medium-quality	53.99	AAI-based (high-confidence)	NA
Capsule1_15050314	127915	5252	8	4	4	28784	27184	34.61	0	11	37	0	0	0	0	0	0	0	0	0	7	2	1	7	9	27	0.243243	3	1	0	4	1	27641	1143	28784	0	1	0.243243	virus-like	NA	0	1	3	0	0	Low-quality	44.21	AAI-based (high-confidence)	NA
Capsule1_04142303	268495	5445	3	1	1	27563	27163	38.29	0	11	33	0	0	0	0	0	0	0	0	0	10	1	8	10	11	14	0.333333	1	0	0	1	1	27563	0	27563	0	1	0.333333	virus-like	NA	0	13	0	0	0	Medium-quality	81.34	AAI-based (high-confidence)	NA
Capsule1_03172221	216682	5567	10	6	6	30293	27893	40.5	0	11	56	0	0	0	0	0	0	0	0	0	8	1	7	8	9	40	0.160714	4	2	0	6	1	27549	2744	30293	0	1	0.160714	virus-like	NA	0	4	3	1	0	Medium-quality	61.42	HMM-based (lower-bound)	NA
Capsule1_08080208	96042	5094	8	3	3	27474	26274	44.28	0	11	30	0	0	0	0	0	0	0	0	0	4	2	6	4	6	18	0.2	3	0	0	3	1	27474	0	27474	0	1	0.2	virus-like	NA	0	5	0	0	0	Low-quality	45.59	AAI-based (medium-confidence)	NA
Capsule1_17021913	315705	5290	6	1	1	27448	27048	33.06	0	11	41	0	0	0	0	0	0	0	0	0	11	0	4	11	11	26	0.268293	1	0	0	1	1	27448	0	27448	0	1	0.268293	virus-like	NA	0	7	0	0	1	Medium-quality	85.36	AAI-based (high-confidence)	NA
Capsule1_03052111	174506	5407	21	8	8	40113	36913	33.92	0	11	40	0	0	0	0	0	0	0	0	0	4	3	0	4	7	33	0.175	4	3	1	7	0.875	27442	11595	39037	1076	0.973176	0.179824	virus-like	NA	0	0	0	0	1	Medium-quality	66.93	AAI-based (medium-confidence)	NA
Capsule1_14201323	238120	4449	9	5	5	29476	27476	44.13	0	11	47	0	0	0	0	0	0	0	0	0	12	1	6	12	13	28	0.276596	4	1	0	5	1	27375	2101	29476	0	1	0.276596	virus-like	NA	0	12	1	0	0	Medium-quality	86.35	AAI-based (high-confidence)	NA
Capsule1_20141604	76829	5460	11	7	7	42154	39354	35.38	0	11	54	0	0	0	0	0	0	0	0	2	13	0	11	15	15	28	0.277778	5	2	0	7	1	27364	14790	42154	0	1	0.277778	virus-like	NA	0	6	3	2	0	Medium-quality	67.89	AAI-based (high-confidence)	NA
Capsule1_04172316	105926	5114	2	2	2	27363	26563	31.87	0	11	40	0	0	0	0	0	0	0	0	0	11	1	5	11	12	23	0.3	2	0	0	2	1	27363	0	27363	0	1	0.3	virus-like	NA	0	6	0	1	0	Medium-quality	77.68	AAI-based (high-confidence)	NA
Capsule1_20101704	179556	5812	11	6	6	32893	30493	52.49	0	11	42	0	0	0	0	0	0	0	0	0	6	0	14	6	6	22	0.142857	3	3	0	6	1	27324	5569	32893	0	1	0.142857	virus-like	NA	1	13	1	1	0	Medium-quality	79.99	AAI-based (high-confidence)	NA
Capsule1_07060312	193223	5171	11	5	5	28766	26766	50.78	0	11	45	0	0	0	0	0	0	0	0	1	12	1	3	13	14	28	0.311111	4	1	0	5	1	27207	1559	28766	0	1	0.311111	virus-like	NA	0	6	0	2	1	Low-quality	37.44	HMM-based (lower-bound)	NA
Capsule1_02020421	291189	5695	8	4	4	28769	27169	42.17	0	11	49	0	0	0	0	0	0	0	0	0	7	1	9	7	8	32	0.163265	3	1	0	4	1	27175	1594	28769	0	1	0.163265	virus-like	NA	0	4	1	1	1	Low-quality	39.23	HMM-based (lower-bound)	low-confidence DTR
Capsule1_08081712	137026	5770	14	5	5	32590	30590	54.65	0	11	58	0	0	0	0	0	0	0	0	0	9	2	6	9	11	41	0.189655	2	3	0	5	1	27160	5430	32590	0	1	0.189655	virus-like	NA	1	5	2	4	0	Low-quality	41.33	HMM-based (lower-bound)	NA
Capsule1_20111515	224003	4611	19	6	6	28177	25777	43.45	0	11	58	0	0	0	0	0	0	0	0	0	6	2	7	6	8	43	0.137931	5	1	0	6	1	27157	1020	28177	0	1	0.137931	virus-like	NA	0	2	2	0	0	Medium-quality	68.76	AAI-based (high-confidence)	NA
Capsule1_03100221	184880	6245	13	7	7	32235	29435	37.06	0	11	33	0	0	0	0	0	0	0	0	0	4	0	5	4	4	24	0.121212	4	3	0	7	1	27155	5080	32235	0	1	0.121212	virus-like	NA	0	2	0	1	0	Medium-quality	50.93	AAI-based (high-confidence)	NA
Capsule1_01231119	115857	5265	10	6	6	28232	25832	29.92	0	11	47	0	0	0	0	0	0	0	0	0	10	1	4	10	11	32	0.234043	5	1	0	6	1	27045	1187	28232	0	1	0.234043	virus-like	NA	0	5	1	0	0	Medium-quality	82.6	AAI-based (high-confidence)	NA
Capsule1_21112017	164939	7611	14	6	6	44366	41966	36.28	0	11	44	0	0	0	0	0	0	0	0	0	8	0	5	8	8	31	0.181818	4	2	0	6	1	26965	17401	44366	0	1	0.181818	virus-like	NA	0	4	0	2	0	Medium-quality	68.89	AAI-based (high-confidence)	NA
Capsule1_03090512	72054	5899	21	11	11	37386	32986	60.94	0	11	62	0	0	0	0	0	0	0	0	0	14	3	4	14	17	41	0.274194	5	3	3	8	0.727273	26947	6843	33790	3596	0.903814	0.303374	virus-like	NA	0	8	1	1	0	Medium-quality	78.54	AAI-based (medium-confidence)	NA
Capsule1_15112109	214107	5337	9	3	3	26931	25731	37.9	0	11	25	0	0	0	0	0	0	0	0	1	3	1	4	4	5	16	0.2	3	0	0	3	1	26931	0	26931	0	1	0.2	virus-like	NA	0	6	0	0	0	Low-quality	46.55	AAI-based (high-confidence)	NA
Capsule1_10040107	352458	5528	5	2	2	26918	26118	44.99	0	11	45	0	0	0	0	0	0	0	0	0	9	2	4	9	11	30	0.244444	2	0	0	2	1	26918	0	26918	0	1	0.244444	virus-like	NA	1	7	1	0	0	Medium-quality	89.61	AAI-based (high-confidence)	NA
Capsule1_23202121	183075	5769	16	4	4	26892	25292	38.17	0	11	29	0	0	0	0	0	0	0	0	0	2	0	9	2	2	18	0.0689655	4	0	0	4	1	26892	0	26892	0	1	0.0689655	virus-like	NA	0	5	1	0	0	Low-quality	49.58	AAI-based (high-confidence)	NA
Capsule1_22011908	89065	5209	4	3	3	26883	25683	34.33	0	11	40	0	0	0	0	0	0	0	0	0	12	1	6	12	13	21	0.325	3	0	0	3	1	26883	0	26883	0	1	0.325	virus-like	NA	0	5	1	0	1	Medium-quality	80.28	AAI-based (high-confidence)	NA
Capsule1_06151004	91570	4574	13	7	7	28162	25362	43.22	0	11	41	0	0	0	0	0	0	0	0	0	4	0	14	4	4	23	0.097561	6	1	0	7	1	26825	1337	28162	0	1	0.097561	virus-like	NA	0	8	0	0	0	Medium-quality	76.39	AAI-based (high-confidence)	NA
Capsule1_09150313	552042	6104	11	7	7	42627	39827	47.35	0	11	57	0	0	0	0	0	0	0	0	0	10	2	8	10	12	37	0.210526	6	1	0	7	1	26761	15866	42627	0	1	0.210526	virus-like	NA	0	8	1	2	1	High-quality	100	AAI-based (high-confidence)	NA
Capsule1_03201316	141503	5065	12	3	3	26722	25522	41.97	0	11	36	0	0	0	0	0	0	0	0	0	5	1	4	5	6	26	0.166667	3	0	0	3	1	26722	0	26722	0	1	0.166667	virus-like	NA	1	2	3	0	0	Medium-quality	67.53	AAI-based (medium-confidence)	NA
Capsule1_08200204	129016	5236	1	1	1	26711	26311	49.02	0	11	40	0	0	0	0	0	0	0	0	0	11	1	5	11	12	23	0.3	1	0	0	1	1	26711	0	26711	0	1	0.3	virus-like	NA	0	5	0	2	0	Complete	100	DTR (medium-confidence)	NA
Capsule1_09011200	182415	4946	6	3	3	26681	25481	44.84	0	11	48	0	0	0	0	0	0	0	0	0	11	1	8	11	12	28	0.25	3	0	0	3	1	26681	0	26681	0	1	0.25	virus-like	NA	0	10	0	0	1	Medium-quality	70.77	AAI-based (high-confidence)	NA
Capsule1_22221023	240160	5170	3	3	3	26667	25467	33.12	0	11	24	0	0	0	0	0	0	0	0	0	6	0	3	6	6	15	0.25	3	0	0	3	1	26667	0	26667	0	1	0.25	virus-like	NA	0	4	0	0	1	Medium-quality	67.85	AAI-based (high-confidence)	NA
Capsule1_17160617	202587	4159	5	2	2	26644	25844	35.41	0	11	39	0	0	0	0	0	0	0	0	0	9	0	5	9	9	25	0.230769	2	0	0	2	1	26644	0	26644	0	1	0.230769	virus-like	NA	0	7	0	0	0	Medium-quality	83.53	AAI-based (high-confidence)	NA
Capsule1_05080118	326533	6451	9	4	4	36005	34405	63.05	0	11	54	0	0	0	0	0	0	0	0	2	12	2	3	14	16	35	0.296296	2	2	0	4	1	26643	9362	36005	0	1	0.296296	virus-like	NA	1	2	2	1	0	High-quality	96.82	AAI-based (medium-confidence)	NA
Capsule1_17172219	121178	4883	12	8	8	29229	26029	45.72	0	11	41	0	0	0	0	0	0	0	0	0	14	4	11	14	18	12	0.439024	6	2	0	8	1	26619	2610	29229	0	1	0.439024	virus-like	NA	0	13	0	0	0	Medium-quality	64.34	AAI-based (high-confidence)	NA
Capsule1_22102118	374748	4839	9	6	6	27625	25225	48.57	0	11	34	0	0	0	0	0	0	0	0	0	3	0	11	3	3	20	0.0882353	5	1	0	6	1	26556	1069	27625	0	1	0.0882353	virus-like	NA	1	11	0	0	0	Medium-quality	68.47	AAI-based (high-confidence)	NA
Capsule1_01230813	18936	3613	14	3	3	26554	25354	37.52	0	11	27	0	0	0	0	0	0	0	0	0	5	1	10	5	6	11	0.222222	3	0	0	3	1	26554	0	26554	0	1	0.222222	virus-like	NA	0	9	0	2	0	Medium-quality	63.38	AAI-based (high-confidence)	NA
Capsule1_01032316	70857	4597	9	5	5	27744	25744	34.34	0	11	48	0	0	0	0	0	0	0	0	0	16	0	4	16	16	28	0.333333	4	0	1	4	0.8	26546	0	26546	1198	0.956819	0.348376	virus-like	NA	0	4	1	0	0	Low-quality	43.69	AAI-based (high-confidence)	NA
Capsule1_15120015	379023	5554	9	3	3	28010	26810	48.68	0	11	30	0	0	0	0	0	0	0	0	0	6	0	12	6	6	12	0.2	2	1	0	3	1	26536	1474	28010	0	1	0.2	virus-like	NA	0	12	1	0	0	Medium-quality	69.82	AAI-based (high-confidence)	NA
Capsule1_17081011	208201	5192	8	2	2	26533	25733	44.88	0	11	34	0	0	0	0	0	0	0	0	0	14	0	6	14	14	14	0.411765	2	0	0	2	1	26533	0	26533	0	1	0.411765	virus-like	NA	0	7	0	0	0	Medium-quality	82.37	AAI-based (high-confidence)	NA
Capsule1_10202112	190351	5412	15	4	4	26532	24932	46.07	0	11	42	0	0	0	0	0	0	0	0	0	4	0	8	4	4	30	0.0952381	4	0	0	4	1	26532	0	26532	0	1	0.0952381	virus-like	NA	1	6	0	0	0	Medium-quality	71.55	AAI-based (high-confidence)	NA
Capsule1_04232118	227039	5504	15	7	7	31201	28401	38.63	0	11	42	0	0	0	0	0	0	0	0	0	5	0	12	5	5	25	0.119048	5	2	0	7	1	26525	4676	31201	0	1	0.119048	virus-like	NA	1	4	0	0	0	Medium-quality	57.79	AAI-based (high-confidence)	NA
Capsule1_03161814	220521	5418	12	7	7	30223	27423	32.66	0	11	52	0	0	0	0	0	0	0	0	0	15	0	11	15	15	26	0.288462	4	3	0	7	1	26477	3746	30223	0	1	0.288462	virus-like	NA	0	12	0	1	2	Medium-quality	87.95	AAI-based (high-confidence)	NA
Capsule1_01190223	105627	4687	6	4	4	28428	26828	35.23	0	11	36	0	0	0	0	0	0	0	0	0	8	0	2	8	8	26	0.222222	4	0	0	4	1	26461	0	26461	0	0.930808	0.238741	virus-like	NA	0	6	0	0	0	Low-quality	41.56	AAI-based (medium-confidence)	NA
Capsule1_20141714	181503	5355	6	2	2	26394	25594	47.3	0	11	39	0	0	0	0	0	0	0	0	1	4	0	5	5	5	29	0.128205	2	0	0	2	1	26394	0	26394	0	1	0.128205	virus-like	NA	0	7	1	1	0	Medium-quality	79.82	AAI-based (high-confidence)	NA
Capsule1_22190610	184265	5155	5	3	3	26389	25189	33.44	0	11	39	0	0	0	0	0	0	0	0	0	12	0	3	12	12	24	0.307692	3	0	0	3	1	26389	0	26389	0	1	0.307692	virus-like	NA	0	5	0	0	0	Medium-quality	87.78	AAI-based (high-confidence)	NA
Capsule1_23082207	255685	5348	21	6	6	29576	27176	34.25	0	11	50	0	0	0	0	0	0	0	0	1	9	2	3	10	12	35	0.24	5	1	0	6	1	26313	3263	29576	0	1	0.24	virus-like	NA	0	3	1	1	0	Medium-quality	63.57	AAI-based (high-confidence)	NA
Capsule1_15192301	94712	4959	16	2	2	26309	25509	33.67	0	11	36	0	0	0	0	0	0	0	0	0	2	0	14	2	2	20	0.0555556	2	0	0	2	1	26309	0	26309	0	1	0.0555556	virus-like	NA	0	3	2	0	0	Medium-quality	50.74	AAI-based (high-confidence)	NA
Capsule1_10221708	50896	4197	14	5	5	26562	24562	40.93	0	11	28	0	0	0	0	0	0	0	0	0	7	2	2	7	9	17	0.321429	5	0	0	5	1	26290	0	26290	0	0.98976	0.324754	virus-like	NA	0	4	2	1	0	Low-quality	42.89	AAI-based (high-confidence)	NA
Capsule1_20020209	322468	5170	6	4	4	26265	24665	48.66	0	11	29	0	0	0	0	0	0	0	0	0	6	1	5	6	7	17	0.241379	4	0	0	4	1	26265	0	26265	0	1	0.241379	virus-like	NA	0	7	0	0	0	Medium-quality	63.4	AAI-based (high-confidence)	NA
Capsule1_00020218	179697	8267	23	8	8	40840	37640	34.43	0	11	47	0	0	0	0	0	0	0	0	0	6	0	1	6	6	40	0.12766	4	4	0	8	1	26237	14603	40840	0	1	0.12766	virus-like	NA	0	2	0	0	1	Medium-quality	68.29	AAI-based (medium-confidence)	NA
Capsule1_18111209	253203	4972	6	3	3	26220	25020	36.95	0	11	26	0	0	0	0	0	0	0	0	0	10	1	7	10	11	8	0.423077	3	0	0	3	1	26220	0	26220	0	1	0.423077	virus-like	NA	0	10	1	0	0	Medium-quality	79.8	AAI-based (high-confidence)	NA
Capsule1_10060312	189827	5435	10	5	5	29457	27457	41.98	0	11	39	0	0	0	0	0	0	0	0	0	8	0	6	8	8	25	0.205128	3	2	0	5	1	26181	3276	29457	0	1	0.205128	virus-like	NA	1	7	1	0	0	Medium-quality	77.97	AAI-based (high-confidence)	NA
Capsule1_10010923	227094	8450	31	12	12	45271	40471	32.88	0	11	41	0	0	0	0	0	0	0	0	0	0	3	3	0	3	35	0.0731707	5	7	0	12	1	26105	16572	42677	0	0.942701	0.0776182	virus-like	NA	0	6	0	0	0	Low-quality	36.6	AAI-based (high-confidence)	NA
Capsule1_03140803	344503	5155	6	3	3	26103	24903	33.31	0	11	37	0	0	0	0	0	0	0	0	0	8	0	6	8	8	23	0.216216	3	0	0	3	1	26103	0	26103	0	1	0.216216	virus-like	NA	0	5	2	0	2	Medium-quality	81.69	AAI-based (medium-confidence)	NA
Capsule1_05170303	460468	5247	7	3	3	25874	24674	34.09	0	11	52	0	0	0	0	0	0	0	0	1	12	0	7	13	13	32	0.25	3	0	0	3	1	25874	0	25874	0	1	0.25	virus-like	NA	0	7	1	3	0	Low-quality	31.7	HMM-based (lower-bound)	NA
Capsule1_03080221	270309	5475	16	6	6	32607	30207	41.41	0	11	33	0	0	0	0	0	0	0	0	0	1	1	14	1	2	17	0.0606061	5	1	0	6	1	25831	6776	32607	0	1	0.0606061	virus-like	NA	0	6	1	0	0	Medium-quality	56.74	AAI-based (high-confidence)	NA
Capsule1_05120605	119546	4790	15	7	7	29585	26785	32.09	0	11	38	0	0	0	0	0	0	0	0	2	7	0	9	9	9	20	0.236842	6	1	0	7	1	25788	3797	29585	0	1	0.236842	virus-like	NA	0	4	2	1	0	Low-quality	48.69	AAI-based (high-confidence)	NA
Capsule1_08222206	188974	4551	5	1	1	25752	25352	32.91	0	11	29	0	0	0	0	0	0	0	0	0	8	0	3	8	8	18	0.275862	1	0	0	1	1	25752	0	25752	0	1	0.275862	virus-like	NA	0	5	0	0	0	Medium-quality	74.27	AAI-based (high-confidence)	NA
Capsule1_22231414	198362	5107	6	3	3	27246	26046	33.3	0	11	39	0	0	0	0	0	0	0	0	0	13	0	5	13	13	21	0.333333	2	1	0	3	1	25736	1510	27246	0	1	0.333333	virus-like	NA	0	6	1	1	0	Medium-quality	80.77	AAI-based (high-confidence)	NA
Capsule1_23172200	65462	5534	16	6	6	31429	29029	34.37	0	11	36	0	0	0	0	0	0	0	0	0	6	0	0	6	6	30	0.166667	3	2	1	5	0.833333	25723	3874	29597	1832	0.94171	0.176983	virus-like	NA	0	3	0	0	0	Low-quality	46	AAI-based (high-confidence)	NA
Capsule1_14110522	171854	5834	10	6	6	28247	25847	38.74	0	11	53	0	0	0	0	0	0	0	0	0	18	0	7	18	18	28	0.339623	4	2	0	6	1	25712	2535	28247	0	1	0.339623	virus-like	NA	1	7	1	2	0	Medium-quality	81.26	AAI-based (high-confidence)	NA
Capsule1_01190909	10254	3462	24	7	7	32818	30018	36.75	0	11	33	0	0	0	0	0	0	0	0	0	7	1	6	7	8	19	0.242424	3	4	0	7	1	25687	7131	32818	0	1	0.242424	virus-like	NA	0	1	1	1	0	Medium-quality	54.44	AAI-based (high-confidence)	NA
Capsule1_18192301	59362	3939	17	7	7	29484	26684	38.23	0	11	44	0	0	0	0	0	0	0	0	0	8	0	1	8	8	35	0.181818	5	2	0	7	1	25589	3895	29484	0	1	0.181818	virus-like	NA	0	2	0	0	0	Low-quality	46.8	AAI-based (high-confidence)	NA
Capsule1_13201518	293937	5774	17	3	3	26814	25614	54.7	0	11	37	0	0	0	0	0	0	0	0	0	18	1	4	18	19	14	0.513514	2	1	0	3	1	25571	1243	26814	0	1	0.513514	virus-like	NA	0	10	3	1	2	Medium-quality	72.18	AAI-based (medium-confidence)	NA
Capsule1_03210504	175508	6046	16	6	6	33006	30606	34.26	0	11	30	0	0	0	0	0	0	0	0	0	5	1	6	5	6	18	0.2	4	2	0	6	1	25525	7481	33006	0	1	0.2	virus-like	NA	0	8	0	0	0	Medium-quality	52.75	AAI-based (medium-confidence)	NA
Capsule1_16051008	20509	3502	5	2	2	25510	24710	32.61	0	11	48	0	0	0	0	0	0	0	0	0	6	0	4	6	6	38	0.125	2	0	0	2	1	25510	0	25510	0	1	0.125	virus-like	NA	0	5	2	1	3	Medium-quality	81.36	AAI-based (high-confidence)	NA
Capsule1_01052315	5759	2620	60	10	10	25432	21432	32.4	0	11	48	0	0	0	0	0	0	0	0	0	10	1	5	10	11	32	0.229167	10	0	0	10	1	25432	0	25432	0	1	0.229167	virus-like	NA	1	3	1	0	3	Medium-quality	81.25	AAI-based (high-confidence)	NA
Capsule1_14170200	128377	4351	13	7	7	25354	22554	39.31	0	11	31	0	0	0	0	0	0	0	0	0	6	1	10	6	7	14	0.225806	7	0	0	7	1	25354	0	25354	0	1	0.225806	virus-like	NA	1	2	2	0	0	Low-quality	46.38	AAI-based (medium-confidence)	NA
Capsule1_08180315	187796	3560	8	3	3	25345	24145	35.66	0	11	29	0	0	0	0	0	0	0	0	0	2	0	4	2	2	23	0.0689655	3	0	0	3	1	25345	0	25345	0	1	0.0689655	virus-like	NA	0	3	0	0	0	Low-quality	48.4	AAI-based (medium-confidence)	NA
Capsule1_10171112	99712	7214	10	7	7	40219	37419	31.92	0	11	60	0	0	0	0	0	0	0	0	1	10	1	5	11	12	43	0.2	2	5	0	7	1	25334	14885	40219	0	1	0.2	virus-like	NA	0	2	2	1	0	Medium-quality	72.36	AAI-based (medium-confidence)	NA
Capsule1_03221503	345429	5399	11	2	2	25301	24501	42.07	0	11	43	0	0	0	0	0	0	0	0	0	8	1	7	8	9	27	0.209302	2	0	0	2	1	25301	0	25301	0	1	0.209302	virus-like	NA	0	9	1	0	0	Medium-quality	70.5	AAI-based (high-confidence)	NA
Capsule1_19230306	149515	4715	10	3	3	27543	26343	32.95	0	11	49	0	0	0	0	0	0	0	0	0	15	0	4	15	15	30	0.306122	2	1	0	3	1	25110	2433	27543	0	1	0.306122	virus-like	NA	0	7	1	0	2	Medium-quality	85.05	AAI-based (high-confidence)	NA
Capsule1_04050921	288249	5541	3	2	2	27321	26521	46.06	0	11	38	0	0	0	0	0	0	0	0	0	9	0	3	9	9	26	0.236842	1	1	0	2	1	25106	2215	27321	0	1	0.236842	virus-like	NA	0	4	1	0	2	Low-quality	41.33	HMM-based (lower-bound)	NA
Capsule1_09022114	148970	4945	11	5	5	25104	23104	45.7	0	11	36	0	0	0	0	0	0	0	0	0	2	1	3	2	3	30	0.0833333	5	0	0	5	1	25104	0	25104	0	1	0.0833333	virus-like	NA	0	1	1	0	0	Medium-quality	70.52	AAI-based (medium-confidence)	NA
Capsule1_23130823	232301	4821	10	6	6	25104	22704	32.01	0	11	43	0	0	0	0	0	0	0	0	1	12	0	3	13	13	27	0.302326	6	0	0	6	1	25104	0	25104	0	1	0.302326	virus-like	NA	1	4	3	1	0	Medium-quality	71.46	AAI-based (high-confidence)	low-confidence DTR
Capsule1_17171518	237224	5657	13	9	9	33944	30344	34.63	0	11	32	0	0	0	0	0	0	0	0	0	5	2	7	5	7	18	0.21875	4	5	0	9	1	25067	8877	33944	0	1	0.21875	virus-like	NA	0	5	0	0	1	Medium-quality	52.91	AAI-based (high-confidence)	NA
Capsule1_18222108	33395	4268	10	5	5	25000	23000	32.27	0	11	41	0	0	0	0	0	0	0	0	0	14	0	3	14	14	24	0.341463	5	0	0	5	1	25000	0	25000	0	1	0.341463	virus-like	NA	0	5	0	0	1	Medium-quality	68.76	AAI-based (high-confidence)	NA
Capsule1_12171111	141020	5072	15	6	6	27479	25079	46.45	0	11	26	0	0	0	0	0	0	0	0	0	8	1	8	8	9	9	0.346154	4	2	0	6	1	24993	2486	27479	0	1	0.346154	virus-like	NA	0	12	0	0	0	Medium-quality	68.71	AAI-based (high-confidence)	NA
Capsule1_14121821	189542	5072	5	2	2	24980	24180	33.23	0	11	33	0	0	0	0	0	0	0	0	1	11	1	3	12	13	17	0.393939	2	0	0	2	1	24980	0	24980	0	1	0.393939	virus-like	NA	1	2	1	3	3	Medium-quality	66.61	AAI-based (high-confidence)	NA
Capsule1_11141009	179664	5352	10	5	5	26642	24642	40.09	0	11	39	0	0	0	0	0	0	0	0	0	17	0	3	17	17	19	0.435897	4	0	1	4	0.8	24954	0	24954	1688	0.936641	0.465383	virus-like	NA	1	5	1	0	0	Medium-quality	73.09	AAI-based (high-confidence)	NA
Capsule1_23051817	238413	4380	15	3	3	24940	23740	38.94	0	11	39	0	0	0	0	0	0	0	0	0	21	0	5	21	21	13	0.538462	3	0	0	3	1	24940	0	24940	0	1	0.538462	virus-like	NA	0	10	0	0	0	Medium-quality	68.95	AAI-based (medium-confidence)	NA
Capsule1_04160119	78681	4562	12	3	3	24928	23728	41.55	0	11	35	0	0	0	0	0	0	0	0	0	11	1	3	11	12	20	0.342857	3	0	0	3	1	24928	0	24928	0	1	0.342857	virus-like	NA	0	4	3	0	0	Medium-quality	68.38	AAI-based (high-confidence)	NA
Capsule1_03181622	137480	4005	15	4	4	24923	23323	44.03	0	11	40	0	0	0	0	0	0	0	0	0	8	0	7	8	8	25	0.2	4	0	0	4	1	24923	0	24923	0	1	0.2	virus-like	NA	0	10	0	0	0	Medium-quality	73.45	AAI-based (high-confidence)	NA
Capsule1_06192003	359287	4855	6	1	1	24902	24502	40.84	0	11	29	0	0	0	0	0	0	0	0	0	4	0	2	4	4	23	0.137931	1	0	0	1	1	24902	0	24902	0	1	0.137931	virus-like	NA	0	3	0	0	0	Medium-quality	55.12	AAI-based (high-confidence)	NA
Capsule1_18021015	134919	5216	7	3	3	24898	23698	49.39	0	11	38	0	0	0	0	0	0	0	0	0	10	0	4	10	10	24	0.263158	3	0	0	3	1	24898	0	24898	0	1	0.263158	virus-like	NA	1	5	1	0	1	Medium-quality	68.15	AAI-based (medium-confidence)	NA
Capsule1_05022323	174579	5065	25	6	6	28972	26572	36.9	0	11	38	0	0	0	0	0	0	0	0	1	6	0	2	7	7	29	0.184211	4	2	0	6	1	24892	4080	28972	0	1	0.184211	virus-like	NA	0	3	0	0	1	Low-quality	46.31	AAI-based (high-confidence)	low-confidence DTR
Capsule1_07231112	56982	5007	14	5	5	26152	24152	35	0	11	45	0	0	0	0	0	0	0	0	0	3	1	4	3	4	37	0.0888889	4	1	0	5	1	24887	1265	26152	0	1	0.0888889	virus-like	NA	0	2	1	1	0	Medium-quality	57.39	AAI-based (medium-confidence)	NA
Capsule1_19110003	253353	6242	22	8	8	29055	25855	45.9	0	11	35	0	0	0	0	0	0	0	0	1	2	1	16	3	4	15	0.114286	6	2	0	8	1	24878	4177	29055	0	1	0.114286	virus-like	NA	0	10	0	1	0	Medium-quality	72.48	AAI-based (high-confidence)	NA
Capsule1_01142203	390119	5131	3	2	2	24877	24077	43.88	0	11	37	0	0	0	0	0	0	0	0	0	14	0	8	14	14	15	0.378378	2	0	0	2	1	24877	0	24877	0	1	0.378378	virus-like	NA	1	10	1	1	1	Medium-quality	78.9	AAI-based (high-confidence)	NA
Capsule1_10051106	207560	4811	2	1	1	24868	24468	45.89	0	11	36	0	0	0	0	0	0	0	0	0	14	0	6	14	14	16	0.388889	1	0	0	1	1	24868	0	24868	0	1	0.388889	virus-like	NA	0	10	2	2	1	Medium-quality	77.5	AAI-based (medium-confidence)	NA
Capsule1_06050003	297153	5003	7	6	6	24823	22423	33.14	0	11	45	0	0	0	0	0	0	0	0	0	12	1	4	12	13	28	0.288889	6	0	0	6	1	24823	0	24823	0	1	0.288889	virus-like	NA	0	6	0	0	2	Medium-quality	79.34	AAI-based (high-confidence)	NA
Capsule1_12051707	284900	3673	7	3	3	24785	23585	47.45	0	11	46	0	0	0	0	0	0	0	0	0	12	0	7	12	12	27	0.26087	3	0	0	3	1	24785	0	24785	0	1	0.26087	virus-like	NA	0	6	0	2	0	High-quality	100	AAI-based (high-confidence)	NA
Capsule1_02010721	392531	9496	12	4	4	49064	47464	41.62	0	11	68	0	0	0	0	0	0	0	0	0	8	4	6	8	12	50	0.176471	2	2	0	4	1	24782	24282	49064	0	1	0.176471	virus-like	NA	1	3	3	3	0	Medium-quality	58.34	HMM-based (lower-bound)	NA
Capsule1_07232205	44482	4560	6	2	2	24751	23951	31.48	0	11	47	0	0	0	0	0	0	0	0	1	13	0	4	14	14	29	0.297872	2	0	0	2	1	24751	0	24751	0	1	0.297872	virus-like	NA	1	6	1	1	2	Medium-quality	75.91	AAI-based (high-confidence)	NA
Capsule1_09230909	212362	5501	10	6	6	29444	27044	46.05	0	11	42	0	0	0	0	0	0	0	0	0	9	2	14	9	11	17	0.261905	4	2	0	6	1	24730	4714	29444	0	1	0.261905	virus-like	NA	1	15	1	0	0	Medium-quality	70.16	AAI-based (high-confidence)	NA
Capsule1_19050020	144623	4983	8	3	3	26062	24862	45.1	0	11	31	0	0	0	0	0	0	0	0	0	10	1	7	10	11	13	0.354839	2	1	0	3	1	24726	1336	26062	0	1	0.354839	virus-like	NA	0	9	1	1	0	Medium-quality	74.59	AAI-based (high-confidence)	NA
Capsule1_08130115	181284	5259	6	3	3	24703	23503	43.06	0	11	30	0	0	0	0	0	0	0	0	0	0	1	3	0	1	26	0.0333333	3	0	0	3	1	24703	0	24703	0	1	0.0333333	virus-like	NA	0	2	1	0	0	Medium-quality	89.46	AAI-based (high-confidence)	NA
Capsule1_18082314	122034	9101	11	6	6	53481	51081	46.89	0	11	55	0	0	0	0	0	0	0	0	0	19	1	5	19	20	30	0.363636	3	3	0	6	1	24699	28782	53481	0	1	0.363636	virus-like	NA	1	3	1	3	0	Medium-quality	87.36	AAI-based (high-confidence)	NA
Capsule1_18022312	92774	4303	2	1	1	24692	24292	31.24	0	11	48	0	0	0	0	0	0	0	0	0	14	1	6	14	15	27	0.3125	1	0	0	1	1	24692	0	24692	0	1	0.3125	virus-like	NA	0	6	1	1	0	Medium-quality	76.41	AAI-based (high-confidence)	NA
Capsule1_13231512	104728	4549	14	4	4	24688	23088	45.48	0	11	35	0	0	0	0	0	0	0	0	0	7	0	6	7	7	22	0.2	4	0	0	4	1	24688	0	24688	0	1	0.2	virus-like	NA	0	5	1	0	0	Medium-quality	76.05	AAI-based (medium-confidence)	NA
Capsule1_06131011	185316	4818	7	1	1	24659	24259	37.29	0	11	26	0	0	0	0	0	0	0	0	0	2	0	6	2	2	18	0.0769231	1	0	0	1	1	24659	0	24659	0	1	0.0769231	virus-like	NA	0	4	1	0	0	Medium-quality	52.09	AAI-based (medium-confidence)	NA
Capsule1_13081323	273330	5742	10	6	6	28662	26262	47.02	0	11	43	0	0	0	0	0	0	0	0	0	16	0	5	16	16	22	0.372093	4	2	0	6	1	24630	4032	28662	0	1	0.372093	virus-like	NA	0	6	2	0	0	Medium-quality	86.74	AAI-based (high-confidence)	NA
Capsule1_00110714	244627	3677	11	3	3	24540	23340	52.77	0	11	43	0	0	0	0	0	0	0	0	0	11	0	3	11	11	29	0.255814	3	0	0	3	1	24540	0	24540	0	1	0.255814	virus-like	NA	0	3	2	2	0	Medium-quality	85.77	AAI-based (high-confidence)	NA
Capsule1_22231103	211533	7048	19	5	5	38147	36147	38.25	0	11	63	0	0	0	0	0	0	0	0	0	8	1	10	8	9	44	0.142857	2	2	1	4	0.8	24438	12667	37105	1042	0.972685	0.146869	virus-like	NA	0	8	1	0	1	Medium-quality	53.76	AAI-based (medium-confidence)	NA
Capsule1_03232112	151113	5097	7	3	3	24402	23202	36.94	0	11	39	0	0	0	0	0	0	0	0	0	10	0	6	10	10	23	0.25641	3	0	0	3	1	24402	0	24402	0	1	0.25641	virus-like	NA	0	5	0	0	0	Medium-quality	74.17	AAI-based (high-confidence)	NA
Capsule1_19221219	158772	5883	6	4	4	29919	28319	57.93	0	11	42	0	0	0	0	0	0	0	0	0	5	0	1	5	5	36	0.119048	2	2	0	4	1	24378	5541	29919	0	1	0.119048	virus-like	NA	0	5	0	0	0	Low-quality	36.72	HMM-based (lower-bound)	NA
Capsule1_17160119	98877	4007	15	4	4	24330	22730	33.73	0	11	36	0	0	0	0	0	0	0	0	0	7	0	7	7	7	22	0.194444	4	0	0	4	1	24330	0	24330	0	1	0.194444	virus-like	NA	0	4	2	1	1	Medium-quality	74.96	AAI-based (high-confidence)	NA
Capsule1_22200212	112728	6466	24	7	7	33148	30348	36.04	0	11	39	0	0	0	0	0	0	0	0	0	8	1	6	8	9	24	0.230769	3	3	1	6	0.857143	24313	7700	32013	1135	0.96576	0.238951	virus-like	NA	0	3	0	1	0	Medium-quality	53.04	AAI-based (high-confidence)	NA
Capsule1_02232203	239551	5112	13	4	4	25696	24096	34.15	0	11	32	0	0	0	0	0	0	0	0	0	9	0	8	9	9	15	0.28125	3	1	0	4	1	24295	1401	25696	0	1	0.28125	virus-like	NA	1	7	1	0	0	Low-quality	43.55	AAI-based (high-confidence)	NA
Capsule1_19080315	168157	4517	7	3	3	24266	23066	33.02	0	11	46	0	0	0	0	0	0	0	0	0	10	0	5	10	10	31	0.217391	3	0	0	3	1	24266	0	24266	0	1	0.217391	virus-like	NA	0	5	1	0	1	Medium-quality	74.25	AAI-based (medium-confidence)	NA
Capsule1_14052014	197152	5109	12	3	3	24253	23053	42.19	0	11	38	0	0	0	0	0	0	0	0	0	4	0	7	4	4	27	0.105263	3	0	0	3	1	24253	0	24253	0	1	0.105263	virus-like	NA	0	8	0	0	0	Medium-quality	68.65	AAI-based (high-confidence)	NA
Capsule1_09202122	208407	6215	19	8	8	42094	38894	35.94	0	11	56	0	0	0	0	0	0	0	0	0	6	6	9	6	12	35	0.214286	4	4	0	8	1	24192	17902	42094	0	1	0.214286	virus-like	NA	0	5	6	0	0	Medium-quality	65.41	AAI-based (high-confidence)	NA
Capsule1_01172311	98769	4754	16	7	7	25361	22561	30.67	0	11	48	0	0	0	0	0	0	0	0	0	12	0	2	12	12	34	0.25	6	1	0	7	1	24160	1201	25361	0	1	0.25	virus-like	NA	0	6	1	1	0	Medium-quality	78.87	AAI-based (high-confidence)	NA
Capsule1_09020909	230691	5508	19	5	5	25451	23451	48.84	0	11	39	0	0	0	0	0	0	0	0	1	8	0	5	9	9	25	0.230769	4	1	0	5	1	24154	1297	25451	0	1	0.230769	virus-like	NA	1	5	4	1	0	Low-quality	35.56	HMM-based (lower-bound)	NA
Capsule1_17152306	124593	4637	6	3	3	24034	22834	32.92	0	11	46	0	0	0	0	0	0	0	0	0	11	1	8	11	12	26	0.26087	3	0	0	3	1	24034	0	24034	0	1	0.26087	virus-like	NA	1	7	1	0	2	Medium-quality	67.06	AAI-based (high-confidence)	NA
Capsule1_18142214	113845	5034	15	7	7	29433	26633	53.65	0	11	51	0	0	0	0	0	0	0	0	0	9	0	6	9	9	36	0.176471	5	1	1	6	0.857143	23977	2308	26285	3148	0.893045	0.197605	virus-like	NA	0	5	2	3	0	Medium-quality	58.01	AAI-based (medium-confidence)	NA
Capsule1_17172115	178897	4270	19	7	7	26656	23856	46.06	0	11	55	0	0	0	0	0	0	0	0	0	6	1	6	6	7	42	0.127273	5	2	0	7	1	23943	2713	26656	0	1	0.127273	virus-like	NA	0	6	0	1	0	Medium-quality	72.97	AAI-based (high-confidence)	NA
Capsule1_10142114	158942	5087	11	2	2	25196	24396	41.79	0	11	21	0	0	0	0	0	0	0	0	0	2	0	8	2	2	11	0.0952381	1	1	0	2	1	23924	1272	25196	0	1	0.0952381	virus-like	NA	0	6	0	0	0	Low-quality	48.6	AAI-based (high-confidence)	NA
Capsule1_06122103	339039	5597	16	6	6	28495	26095	31.26	0	11	47	0	0	0	0	0	0	0	0	0	8	1	2	8	9	36	0.191489	3	3	0	6	1	23876	4619	28495	0	1	0.191489	virus-like	NA	0	4	0	3	0	Medium-quality	50.15	AAI-based (high-confidence)	NA
Capsule1_06092003	6364	2913	47	7	7	25256	22456	40.48	0	11	38	0	0	0	0	0	0	0	0	0	10	0	8	10	10	20	0.263158	6	1	0	7	1	23834	1422	25256	0	1	0.263158	virus-like	NA	0	12	0	0	0	Low-quality	39.24	AAI-based (medium-confidence)	NA
Capsule1_06230923	84999	3377	16	6	6	25122	22722	32.23	0	11	31	0	0	0	0	0	0	0	0	0	6	0	3	6	6	22	0.193548	5	1	0	6	1	23814	1308	25122	0	1	0.193548	virus-like	NA	0	4	0	0	0	Medium-quality	71.54	AAI-based (high-confidence)	NA
Capsule1_23140817	296507	4572	8	4	4	23803	22203	33.57	0	11	41	0	0	0	0	0	0	0	0	0	9	0	3	9	9	29	0.219512	4	0	0	4	1	23803	0	23803	0	1	0.219512	virus-like	NA	0	4	1	0	1	Medium-quality	73.26	AAI-based (medium-confidence)	NA
Capsule1_19170303	262686	4727	12	5	5	25010	23010	55.21	0	11	48	0	0	0	0	0	0	0	0	0	13	1	4	13	14	30	0.291667	4	1	0	5	1	23796	1214	25010	0	1	0.291667	virus-like	NA	0	4	2	0	0	Medium-quality	70.49	AAI-based (high-confidence)	NA
Capsule1_21112317	150539	3672	8	4	4	23762	22162	30.15	0	11	50	0	0	0	0	0	0	0	0	0	16	0	1	16	16	33	0.32	4	0	0	4	1	23762	0	23762	0	1	0.32	virus-like	NA	0	6	1	0	0	Medium-quality	72.74	AAI-based (high-confidence)	NA
Capsule1_21051518	345731	5810	14	7	7	28219	25419	49.63	0	11	43	0	0	0	0	0	0	0	0	0	15	2	4	15	17	22	0.395349	4	3	0	7	1	23741	4478	28219	0	1	0.395349	virus-like	NA	0	4	3	0	1	Medium-quality	79.72	AAI-based (high-confidence)	NA
Capsule1_00050909	384077	7739	9	3	3	40613	39413	52.46	0	11	65	0	0	0	0	0	0	0	0	2	10	1	4	12	13	48	0.2	2	1	0	3	1	23603	17010	40613	0	1	0.2	virus-like	NA	1	4	0	0	0	Low-quality	45.96	HMM-based (lower-bound)	NA
Capsule1_00061206	199421	4957	22	5	5	24597	22597	51.03	0	11	36	0	0	0	0	0	0	0	0	0	3	0	10	3	3	23	0.0833333	4	1	0	5	1	23596	1001	24597	0	1	0.0833333	virus-like	NA	0	12	1	0	0	Medium-quality	54.58	AAI-based (medium-confidence)	NA
Capsule1_03230219	111146	4819	17	7	7	26414	23614	38.22	0	11	45	0	0	0	0	0	0	0	0	0	5	0	6	5	5	34	0.111111	5	2	0	7	1	23575	2839	26414	0	1	0.111111	virus-like	NA	0	6	0	2	0	Medium-quality	66.43	AAI-based (high-confidence)	NA
Capsule1_01200315	149609	5102	12	3	3	24521	23321	49.89	0	11	39	0	0	0	0	0	0	0	0	0	10	0	4	10	10	25	0.25641	2	1	0	3	1	23497	1024	24521	0	1	0.25641	virus-like	NA	1	5	0	2	0	Medium-quality	74.3	AAI-based (high-confidence)	NA
Capsule1_02191823	108543	5412	7	4	4	31130	29530	36.31	0	11	41	0	0	0	0	0	0	0	0	0	14	3	5	14	17	19	0.414634	1	2	1	3	0.75	23473	6630	30103	1027	0.967009	0.42878	virus-like	NA	1	2	2	0	0	Medium-quality	53.32	AAI-based (high-confidence)	NA
Capsule1_02190307	267218	4766	9	4	4	24911	23311	30.23	0	11	45	0	0	0	0	0	0	0	0	0	11	0	6	11	11	28	0.244444	3	1	0	4	1	23382	1529	24911	0	1	0.244444	virus-like	NA	0	12	0	0	0	Medium-quality	77.08	AAI-based (high-confidence)	NA
Capsule1_15132209	414598	5254	7	3	3	25746	24546	43.51	0	11	34	0	0	0	0	0	0	0	0	0	3	2	5	3	5	24	0.147059	2	1	0	3	1	23363	2383	25746	0	1	0.147059	virus-like	NA	0	4	0	0	1	Medium-quality	70.51	AAI-based (high-confidence)	NA
Capsule1_17110112	106907	5334	15	9	9	30263	26663	36.83	0	11	29	0	0	0	0	0	0	0	0	0	4	0	8	4	4	17	0.137931	5	4	0	9	1	23356	6907	30263	0	1	0.137931	virus-like	NA	0	1	1	0	2	Low-quality	42.82	AAI-based (high-confidence)	NA
Capsule1_01031805	184321	4622	3	1	1	23355	22955	41.44	0	11	27	0	0	0	0	0	0	0	0	0	7	0	7	7	7	13	0.259259	1	0	0	1	1	23355	0	23355	0	1	0.259259	virus-like	NA	0	8	1	1	0	Low-quality	35.95	HMM-based (lower-bound)	NA
Capsule1_22230319	83809	4728	20	7	7	24869	22069	46.12	0	11	38	0	0	0	0	0	0	0	0	0	2	0	10	2	2	26	0.0526316	6	0	1	6	0.857143	23339	0	23339	1530	0.938478	0.0560819	virus-like	NA	1	3	2	0	1	Low-quality	43.38	AAI-based (high-confidence)	NA
Capsule1_09062209	172971	4757	13	7	7	23280	20480	45.95	0	11	37	0	0	0	0	0	0	0	0	0	5	0	1	5	5	31	0.135135	7	0	0	7	1	23280	0	23280	0	1	0.135135	virus-like	NA	0	0	2	1	0	Medium-quality	67	AAI-based (medium-confidence)	NA
Capsule1_06050509	216190	5460	17	5	5	25924	23924	66.64	0	11	41	0	0	0	0	0	0	0	0	1	7	0	5	8	8	28	0.195122	3	1	1	4	0.8	23251	1160	24411	1513	0.941637	0.207216	virus-like	NA	0	5	0	2	0	Low-quality	38.05	AAI-based (medium-confidence)	NA
Capsule1_06151215	251556	5440	10	5	5	27717	25717	44.84	0	11	48	0	0	0	0	0	0	0	0	1	7	2	1	8	10	37	0.208333	4	1	0	5	1	23249	4468	27717	0	1	0.208333	virus-like	NA	0	2	1	2	0	Low-quality	49.94	AAI-based (medium-confidence)	NA
Capsule1_08022110	210683	5349	7	1	1	25589	25189	36.56	0	11	35	0	0	0	0	0	0	0	0	0	7	2	11	7	9	15	0.257143	1	0	0	1	1	23235	0	23235	0	0.908007	0.283195	virus-like	NA	0	6	0	0	0	Medium-quality	51.82	AAI-based (medium-confidence)	NA
Capsule1_12071313	317906	4239	8	4	4	23229	21629	34.8	0	11	33	0	0	0	0	0	0	0	0	0	6	1	6	6	7	20	0.212121	4	0	0	4	1	23229	0	23229	0	1	0.212121	virus-like	NA	0	3	0	0	0	Medium-quality	74.92	AAI-based (medium-confidence)	NA
Capsule1_09232108	32023	8126	25	7	7	55249	52449	61.3	0	11	50	0	0	0	0	0	0	0	0	2	8	1	3	10	11	36	0.22	2	5	0	7	1	23217	32032	55249	0	1	0.22	virus-like	NA	0	2	1	3	0	Low-quality	34.8	HMM-based (lower-bound)	NA
Capsule1_03101206	170899	4431	19	7	7	27497	24697	33.83	0	11	43	0	0	0	0	0	0	0	0	0	3	0	9	3	3	31	0.0697674	5	2	0	7	1	23192	4305	27497	0	1	0.0697674	virus-like	NA	0	6	2	0	0	Low-quality	48.34	AAI-based (high-confidence)	NA
Capsule1_06220606	192520	5385	13	4	4	24213	22613	46.79	0	11	36	0	0	0	0	0	0	0	0	1	10	1	5	11	12	19	0.333333	3	0	1	3	0.75	23130	0	23130	1083	0.955272	0.348941	virus-like	NA	1	5	0	1	0	Medium-quality	70.06	AAI-based (high-confidence)	NA
Capsule1_01130904	164866	4680	17	6	6	25760	23360	50.19	0	11	38	0	0	0	0	0	0	0	0	0	14	0	4	14	14	20	0.368421	5	1	0	6	1	23059	2204	25263	0	0.980707	0.375669	virus-like	NA	1	5	0	1	0	Low-quality	32.45	HMM-based (lower-bound)	NA
Capsule1_12222321	139584	4010	22	6	6	23049	20649	31.1	0	11	33	0	0	0	0	0	0	0	0	0	10	0	3	10	10	20	0.30303	6	0	0	6	1	23049	0	23049	0	1	0.30303	virus-like	NA	1	5	0	0	0	Medium-quality	72.09	AAI-based (high-confidence)	NA
Capsule1_15171507	244585	4250	9	3	3	23026	21826	37.7	0	11	40	0	0	0	0	0	0	0	0	0	12	1	3	12	13	24	0.325	3	0	0	3	1	23026	0	23026	0	1	0.325	virus-like	NA	0	5	1	1	1	Medium-quality	71.06	AAI-based (medium-confidence)	NA
Capsule1_05100009	69222	4489	23	6	6	26586	24186	32.68	0	11	24	0	0	0	0	0	0	0	0	0	3	1	1	3	4	19	0.166667	4	2	0	6	1	22998	3588	26586	0	1	0.166667	virus-like	NA	0	1	1	0	0	Low-quality	41.33	AAI-based (medium-confidence)	NA
Capsule1_05202121	5843	2879	21	3	3	23746	22546	48.47	0	11	28	0	0	0	0	0	0	0	0	1	1	0	2	2	2	24	0.0714286	3	0	0	3	1	22921	0	22921	0	0.965257	0.0739995	virus-like	NA	0	4	0	0	0	Low-quality	42.69	AAI-based (medium-confidence)	NA
Capsule1_16140006	39074	4492	7	4	4	24316	22716	32.5	0	11	39	0	0	0	0	0	0	0	0	0	11	0	1	11	11	27	0.282051	3	1	0	4	1	22903	1413	24316	0	1	0.282051	virus-like	NA	0	3	0	0	1	Medium-quality	68.83	AAI-based (high-confidence)	NA
Capsule1_21160509	306257	5164	22	6	6	27135	24735	55.98	0	11	44	0	0	0	0	0	0	0	0	1	13	0	8	14	14	22	0.318182	5	1	0	6	1	22893	4242	27135	0	1	0.318182	virus-like	NA	1	11	1	0	1	Medium-quality	67.61	AAI-based (medium-confidence)	NA
Capsule1_09112016	4994	2436	25	7	7	24222	21422	35.53	0	11	37	0	0	0	0	0	0	0	0	0	1	2	10	1	3	24	0.0810811	6	1	0	7	1	22889	1333	24222	0	1	0.0810811	virus-like	NA	0	6	2	0	0	Low-quality	47.81	AAI-based (high-confidence)	NA
Capsule1_09081603	131494	4337	16	6	6	25322	22922	36.68	0	11	34	0	0	0	0	0	0	0	0	1	8	0	9	9	9	16	0.264706	5	1	0	6	1	22853	2469	25322	0	1	0.264706	virus-like	NA	0	1	1	1	0	Low-quality	40.35	AAI-based (high-confidence)	NA
Capsule1_16221823	107823	4397	14	6	6	24110	21710	38.69	0	11	35	0	0	0	0	0	0	0	0	0	10	2	6	10	12	17	0.342857	5	0	1	5	0.833333	22847	0	22847	1263	0.947615	0.361811	virus-like	NA	0	4	0	0	1	Medium-quality	63.87	AAI-based (high-confidence)	NA
Capsule1_05131212	181309	4308	12	3	3	22833	21633	53.54	0	11	43	0	0	0	0	0	0	0	0	0	7	1	1	7	8	34	0.186047	3	0	0	3	1	22833	0	22833	0	1	0.186047	virus-like	NA	0	4	0	0	0	Low-quality	24.31	HMM-based (lower-bound)	NA
Capsule1_03231115	281240	4470	17	8	8	25907	22707	48.03	0	11	44	0	0	0	0	0	0	0	0	0	10	1	7	10	11	26	0.25	6	2	0	8	1	22809	3098	25907	0	1	0.25	virus-like	NA	0	8	0	0	0	Medium-quality	64.16	AAI-based (medium-confidence)	NA
Capsule1_15140203	487896	6473	30	7	7	27811	25011	39.49	0	11	47	0	0	0	0	0	0	0	0	0	9	0	5	9	9	33	0.191489	5	2	0	7	1	22786	5025	27811	0	1	0.191489	virus-like	NA	0	5	0	0	0	Low-quality	40.63	AAI-based (high-confidence)	NA
Capsule1_01050918	7819	3224	36	9	9	30664	27064	33.3	0	11	15	0	0	0	0	0	0	0	0	0	0	0	0	0	0	0	0	4	4	1	8	0.888889	22784	6593	29377	1287	0.958029	0	virus-like	NA	0	1	0	0	0	Low-quality	33.94	AAI-based (high-confidence)	NA
Capsule1_20110223	237677	6671	19	7	7	45295	42495	50.83	0	11	80	0	0	0	0	0	0	0	0	0	14	1	3	14	15	62	0.1875	4	3	0	7	1	22784	19283	42067	0	0.928734	0.201888	virus-like	NA	1	4	3	1	1	Medium-quality	57.73	HMM-based (lower-bound)	NA
Capsule1_16221407	178978	4465	5	2	2	22760	21960	44.69	0	11	29	0	0	0	0	0	0	0	0	0	8	1	3	8	9	17	0.310345	2	0	0	2	1	22760	0	22760	0	1	0.310345	virus-like	NA	0	6	1	0	0	Medium-quality	66.85	AAI-based (high-confidence)	NA
Capsule1_03111201	83581	4806	7	5	5	26273	24273	32.95	0	11	41	0	0	0	0	0	0	0	0	0	7	0	5	7	7	29	0.170732	4	1	0	5	1	22726	3547	26273	0	1	0.170732	virus-like	NA	0	5	1	0	3	Medium-quality	82.75	AAI-based (high-confidence)	NA
Capsule1_08051018	187085	4658	6	4	4	22720	21120	32.68	0	11	38	0	0	0	0	0	0	0	0	0	9	1	8	9	10	20	0.263158	4	0	0	4	1	22720	0	22720	0	1	0.263158	virus-like	NA	0	8	0	0	0	Medium-quality	57.66	AAI-based (high-confidence)	NA
Capsule1_09020907	384250	4594	9	5	5	23925	21925	33.74	0	11	41	0	0	0	0	0	0	0	0	0	9	0	6	9	9	26	0.219512	4	1	0	5	1	22719	1206	23925	0	1	0.219512	virus-like	NA	0	5	1	0	0	Medium-quality	74.19	AAI-based (medium-confidence)	NA
Capsule1_05140209	120889	5227	33	6	6	25900	23500	35.38	0	11	36	0	0	0	0	0	0	0	0	1	4	1	2	5	6	28	0.166667	4	2	0	6	1	22700	3200	25900	0	1	0.166667	virus-like	NA	0	3	1	0	1	Low-quality	40.34	AAI-based (high-confidence)	NA
Capsule1_15150817	312854	5709	14	5	5	27955	25955	37.2	0	11	46	0	0	0	0	0	0	0	0	0	6	0	4	6	6	36	0.130435	2	3	0	5	1	22699	5256	27955	0	1	0.130435	virus-like	NA	1	2	3	0	0	Medium-quality	78.62	AAI-based (high-confidence)	NA
Capsule1_12101014	191090	4363	1	1	1	22628	22228	45.28	0	11	28	0	0	0	0	0	0	0	0	0	4	1	6	4	5	17	0.178571	1	0	0	1	1	22628	0	22628	0	1	0.178571	virus-like	NA	0	4	1	0	0	Medium-quality	61.4	AAI-based (high-confidence)	NA
Capsule1_03131313	191560	4623	9	4	4	23804	22204	36.68	0	11	42	0	0	0	0	0	0	0	0	2	12	0	3	14	14	25	0.333333	3	1	0	4	1	22626	1178	23804	0	1	0.333333	virus-like	NA	0	5	0	1	1	Medium-quality	73.67	AAI-based (high-confidence)	NA
Capsule1_01100722	10648	4030	90	15	15	36523	30523	32.69	0	11	47	0	0	0	0	0	0	0	0	2	4	2	6	6	8	33	0.170213	7	8	0	15	1	22620	13903	36523	0	1	0.170213	virus-like	NA	0	4	1	0	0	Low-quality	12.59	AAI-based (high-confidence)	NA
Capsule1_12051503	224730	3881	18	6	6	23650	21250	40.94	0	11	40	0	0	0	0	0	0	0	0	2	11	1	7	13	14	19	0.35	6	0	0	6	1	22614	0	22614	0	0.956195	0.366034	virus-like	NA	0	9	0	1	2	Medium-quality	67.54	AAI-based (medium-confidence)	NA
Capsule1_15200020	162724	4731	10	6	6	25102	22702	34.38	0	11	34	0	0	0	0	0	0	0	0	2	6	1	5	8	9	20	0.264706	4	2	0	6	1	22559	2543	25102	0	1	0.264706	virus-like	NA	2	5	0	0	0	Medium-quality	76.54	AAI-based (high-confidence)	NA
Capsule1_17051809	226098	5166	7	4	4	28953	27353	33.55	0	11	57	0	0	0	0	0	0	0	0	0	7	0	7	7	7	43	0.122807	2	2	0	4	1	22547	6406	28953	0	1	0.122807	virus-like	NA	0	9	1	0	1	Medium-quality	79.41	AAI-based (medium-confidence)	NA
Capsule1_21172321	247546	4315	5	2	2	22540	21740	32.59	0	11	36	0	0	0	0	0	0	0	0	0	7	1	4	7	8	24	0.222222	2	0	0	2	1	22540	0	22540	0	1	0.222222	virus-like	NA	0	3	1	1	1	Medium-quality	65.12	AAI-based (high-confidence)	NA
Capsule1_07192304	59319	4390	10	6	6	25873	23473	44.54	0	11	34	0	0	0	0	0	0	0	0	0	9	0	6	9	9	19	0.264706	4	2	0	6	1	22536	3337	25873	0	1	0.264706	virus-like	NA	0	5	1	1	2	Medium-quality	60.67	AAI-based (medium-confidence)	NA
Capsule1_02232310	192098	4633	17	5	5	22531	20531	31.47	0	11	36	0	0	0	0	0	0	0	0	0	14	0	6	14	14	16	0.388889	5	0	0	5	1	22531	0	22531	0	1	0.388889	virus-like	NA	0	8	0	0	2	Medium-quality	57.03	AAI-based (high-confidence)	low-confidence DTR
Capsule1_09220419	56012	4825	14	6	6	27627	25227	35.45	0	11	49	0	0	0	0	0	0	0	0	0	10	0	1	10	10	38	0.204082	4	2	0	6	1	22489	5138	27627	0	1	0.204082	virus-like	NA	0	2	0	0	0	Low-quality	43.77	AAI-based (high-confidence)	NA
Capsule1_04022322	146230	4966	11	3	3	23868	22668	33.77	0	11	46	0	0	0	0	0	0	0	0	0	13	2	3	13	15	28	0.326087	2	1	0	3	1	22484	1384	23868	0	1	0.326087	virus-like	NA	0	4	0	3	1	Medium-quality	61.63	AAI-based (high-confidence)	NA
Capsule1_15161721	345850	4446	7	4	4	22449	20849	46.29	0	11	37	0	0	0	0	0	0	0	0	0	12	1	5	12	13	19	0.351351	4	0	0	4	1	22449	0	22449	0	1	0.351351	virus-like	NA	0	10	2	0	1	Medium-quality	70.68	AAI-based (high-confidence)	NA
Capsule1_22051016	128570	4618	6	2	2	22416	21616	43.07	0	11	41	0	0	0	0	0	0	0	0	0	6	1	8	6	7	26	0.170732	2	0	0	2	1	22416	0	22416	0	1	0.170732	virus-like	NA	0	3	2	1	1	Medium-quality	62.16	AAI-based (high-confidence)	NA
Capsule1_21231506	48273	6662	9	4	4	37145	35545	59.81	0	11	60	0	0	0	0	0	0	0	0	1	11	0	1	12	12	47	0.2	3	1	0	4	1	22403	14742	37145	0	1	0.2	virus-like	NA	0	2	0	0	0	High-quality	94.06	AAI-based (medium-confidence)	NA
Capsule1_19010613	29338	3238	13	5	5	25959	23959	38.8	0	11	17	0	0	0	0	0	0	0	0	0	3	1	0	3	4	13	0.235294	3	2	0	5	1	22398	3561	25959	0	1	0.235294	virus-like	NA	0	1	1	0	0	Low-quality	44.54	AAI-based (medium-confidence)	NA
Capsule1_19141608	108349	5187	15	4	4	26826	25226	49.55	0	11	31	0	0	0	0	0	0	0	0	0	14	1	3	14	15	13	0.483871	2	1	1	3	0.75	22368	2906	25274	1552	0.942146	0.513584	virus-like	NA	1	7	0	0	0	Medium-quality	69.84	AAI-based (high-confidence)	NA
Capsule1_17132309	239214	4705	6	3	3	24954	23754	33.82	0	11	38	0	0	0	0	0	0	0	0	1	8	1	4	9	10	24	0.263158	2	1	0	3	1	22364	1308	23672	0	0.948625	0.27741	virus-like	NA	0	4	0	0	0	Medium-quality	67.8	AAI-based (high-confidence)	NA
Capsule1_02172318	284550	4481	2	2	2	22343	21543	39.43	0	11	30	0	0	0	0	0	0	0	0	0	11	0	7	11	11	12	0.366667	2	0	0	2	1	22343	0	22343	0	1	0.366667	virus-like	NA	0	7	0	0	0	Medium-quality	63.96	AAI-based (high-confidence)	NA
Capsule1_22170821	248484	6017	14	7	7	37183	34383	50.32	0	11	45	0	0	0	0	0	0	0	0	1	7	0	7	8	8	30	0.177778	4	3	0	7	1	22330	14853	37183	0	1	0.177778	virus-like	NA	0	10	0	0	1	High-quality	100	AAI-based (high-confidence)	NA
Capsule1_21110500	160986	5199	8	5	5	27872	25872	51.94	0	11	36	0	0	0	0	0	0	0	0	3	13	0	4	16	16	16	0.444444	3	1	1	4	0.8	22327	4039	26366	1506	0.945967	0.469831	virus-like	NA	1	5	1	2	3	Medium-quality	67	AAI-based (medium-confidence)	NA
Capsule1_05100612	157865	6008	20	7	7	31118	28318	35.79	0	11	31	0	0	0	0	0	0	0	0	1	4	1	0	5	6	25	0.193548	5	2	0	7	1	22308	8810	31118	0	1	0.193548	virus-like	NA	0	0	2	0	0	Low-quality	27.02	HMM-based (lower-bound)	NA
Capsule1_11112216	124775	3767	8	3	3	25263	24063	30.61	0	11	29	0	0	0	0	0	0	0	0	2	1	1	5	3	4	20	0.137931	2	1	0	3	1	22296	2967	25263	0	1	0.137931	virus-like	NA	0	0	0	0	0	Low-quality	19.73	HMM-based (lower-bound)	NA
Capsule1_12140409	128409	4381	11	5	5	29094	27094	35.37	0	11	38	0	0	0	0	0	0	0	0	0	11	1	1	11	12	25	0.315789	4	1	0	5	1	22267	6827	29094	0	1	0.315789	virus-like	NA	0	1	1	1	0	Low-quality	45.59	AAI-based (high-confidence)	NA
Capsule1_12162003	208639	4763	10	4	4	23809	22209	50.56	0	11	26	0	0	0	0	0	0	0	0	0	9	0	6	9	9	11	0.346154	3	1	0	4	1	22261	1548	23809	0	1	0.346154	virus-like	NA	0	6	0	1	0	Medium-quality	72.52	AAI-based (high-confidence)	NA
Capsule1_12110918	158002	9292	26	13	13	52152	46952	67.3	0	11	97	0	0	0	0	0	0	0	0	1	24	0	2	25	25	70	0.257732	5	6	2	11	0.846154	22257	26488	48745	3407	0.934672	0.275746	virus-like	NA	1	3	0	5	1	Medium-quality	84.38	HMM-based (lower-bound)	NA
Capsule1_00192315	114544	5579	32	12	12	35719	30919	51.2	0	11	62	0	0	0	0	0	0	0	0	1	8	0	5	9	9	48	0.145161	6	5	1	11	0.916667	22249	12457	34706	1013	0.97164	0.149398	virus-like	NA	1	3	3	0	0	Medium-quality	53.44	HMM-based (lower-bound)	NA
Capsule1_08012114	122595	4684	3	2	2	25881	25081	50.62	0	11	42	0	0	0	0	0	0	0	0	0	9	0	3	9	9	30	0.214286	1	1	0	2	1	22249	3632	25881	0	1	0.214286	virus-like	NA	0	5	0	0	0	Medium-quality	70.4	AAI-based (high-confidence)	NA
Capsule1_20011118	148959	4507	10	5	5	22225	20225	33.85	0	11	45	0	0	0	0	0	0	0	0	0	7	0	5	7	7	33	0.155556	5	0	0	5	1	22225	0	22225	0	1	0.155556	virus-like	NA	0	3	1	0	2	Medium-quality	65.19	AAI-based (medium-confidence)	NA
Capsule1_03170409	231556	5442	20	4	4	24660	23060	46.23	0	11	29	0	0	0	0	0	0	0	0	0	5	1	6	5	6	17	0.206897	2	2	0	4	1	22199	2461	24660	0	1	0.206897	virus-like	NA	0	6	0	1	0	Medium-quality	67.42	AAI-based (high-confidence)	NA
Capsule1_02210718	134554	5631	21	6	6	29716	27316	42.14	0	11	34	0	0	0	0	0	0	0	0	0	9	1	2	9	10	22	0.294118	4	2	0	6	1	22196	7520	29716	0	1	0.294118	virus-like	NA	0	3	0	0	1	Low-quality	48.61	AAI-based (high-confidence)	NA
Capsule1_19100616	65091	4426	23	8	8	25924	22724	34.07	0	11	28	0	0	0	0	0	0	0	0	1	3	0	12	4	4	12	0.142857	5	3	0	8	1	22184	3740	25924	0	1	0.142857	virus-like	NA	0	7	0	0	0	Low-quality	17.03	AAI-based (medium-confidence)	NA
Capsule1_12082012	104333	3870	9	5	5	23809	21809	45.33	0	11	30	0	0	0	0	0	0	0	0	0	3	1	15	3	4	11	0.133333	4	1	0	5	1	22108	1701	23809	0	1	0.133333	virus-like	NA	0	8	0	0	1	Medium-quality	57.24	AAI-based (high-confidence)	NA
Capsule1_06101321	178747	5548	22	4	4	24989	23389	66.13	0	11	40	0	0	0	0	0	0	0	0	0	5	0	6	5	5	29	0.125	3	1	0	4	1	22099	2890	24989	0	1	0.125	virus-like	NA	0	7	1	0	0	Low-quality	30.83	HMM-based (lower-bound)	NA
Capsule1_09021507	404164	5241	18	4	4	23905	22305	45.27	0	11	21	0	0	0	0	0	0	0	0	0	2	0	0	2	2	19	0.0952381	3	1	0	4	1	22017	1888	23905	0	1	0.0952381	virus-like	NA	0	2	0	0	0	Medium-quality	61.82	AAI-based (high-confidence)	low-confidence DTR
Capsule1_08102206	79490	2405	10	4	4	24744	23144	51.14	0	14	35	0	0	0	0	0	0	0	0	0	4	0	2	4	4	29	0.114286	3	1	0	4	1	22013	2731	24744	0	1	0.114286	virus-like	NA	0	1	1	0	0	Medium-quality	70.34	AAI-based (medium-confidence)	high kmer_freq may indicate large duplication
Capsule1_18170521	176865	4458	15	3	3	24036	22836	32.01	0	11	26	0	0	0	0	0	0	0	0	0	8	0	6	8	8	12	0.307692	2	1	0	3	1	21929	2107	24036	0	1	0.307692	virus-like	NA	0	7	0	1	0	Medium-quality	69.57	AAI-based (high-confidence)	NA
Capsule1_12000709	120208	4553	7	5	5	25891	23891	31.37	0	11	57	0	0	0	0	0	0	0	0	0	11	0	7	11	11	39	0.192982	4	0	1	4	0.8	21921	0	21921	3970	0.846665	0.227933	virus-like	NA	0	7	0	2	0	Medium-quality	63.03	AAI-based (high-confidence)	NA
Capsule1_17201122	90204	4500	6	3	3	21916	20716	47.84	0	11	34	0	0	0	0	0	0	0	0	0	7	0	4	7	7	23	0.205882	3	0	0	3	1	21916	0	21916	0	1	0.205882	virus-like	NA	0	8	0	0	0	Medium-quality	72.98	AAI-based (high-confidence)	NA
Capsule1_00020506	398387	4837	12	5	5	23644	21644	50.03	0	11	40	0	0	0	0	0	0	0	0	2	7	0	5	9	9	26	0.225	4	1	0	5	1	21903	1741	23644	0	1	0.225	virus-like	NA	0	6	1	0	0	Medium-quality	71.69	AAI-based (high-confidence)	NA
Capsule1_03172322	87922	4201	4	2	2	21886	21086	46	0	11	27	0	0	0	0	0	0	0	0	0	9	0	6	9	9	12	0.333333	2	0	0	2	1	21886	0	21886	0	1	0.333333	virus-like	NA	0	7	1	2	1	Medium-quality	61.49	AAI-based (medium-confidence)	NA
Capsule1_15141003	171608	4316	6	3	3	21879	20679	32.7	0	11	37	0	0	0	0	0	0	0	0	0	14	0	4	14	14	19	0.378378	3	0	0	3	1	21879	0	21879	0	1	0.378378	virus-like	NA	0	4	0	0	0	Medium-quality	52.62	AAI-based (high-confidence)	NA
Capsule1_01080403	6551	2361	6	4	4	21875	20275	54.46	0	11	33	0	0	0	0	0	0	0	0	0	2	0	3	2	2	28	0.0606061	4	0	0	4	1	21875	0	21875	0	1	0.0606061	virus-like	NA	0	3	1	0	0	Medium-quality	61.61	AAI-based (medium-confidence)	high kmer_freq may indicate large duplication
Capsule1_01230007	147819	4450	26	8	8	29892	26692	34.15	0	11	44	0	0	0	0	0	0	0	0	1	6	0	5	7	7	32	0.159091	6	2	0	8	1	21807	8085	29892	0	1	0.159091	virus-like	NA	0	0	1	1	0	Low-quality	47.44	AAI-based (high-confidence)	NA
Capsule1_16050022	25596	2958	8	4	3	22785	20585	46.05	0	11	28	0	0	0	0	0	0	0	0	0	7	0	2	7	7	19	0.25	3	1	0	4	1	21785	1000	22785	0	1	0.25	virus-like	NA	0	3	0	0	0	Medium-quality	63.85	AAI-based (medium-confidence)	NA
Capsule1_03051801	113759	3433	6	2	2	21776	20976	37.27	0	11	43	0	0	0	0	0	0	0	0	0	8	0	0	8	8	35	0.186047	2	0	0	2	1	21776	0	21776	0	1	0.186047	virus-like	NA	0	0	0	1	2	Medium-quality	72.63	AAI-based (medium-confidence)	NA
Capsule1_18000500	146085	4340	16	5	5	23466	21466	48.78	0	11	26	0	0	0	0	0	0	0	0	0	2	0	11	2	2	13	0.0769231	4	1	0	5	1	21735	1731	23466	0	1	0.0769231	virus-like	NA	1	11	0	0	0	Medium-quality	58.57	AAI-based (high-confidence)	NA
Capsule1_02232315	211103	4192	2	1	1	21731	21331	44.52	0	11	35	0	0	0	0	0	0	0	0	0	7	1	6	7	8	21	0.228571	1	0	0	1	1	21731	0	21731	0	1	0.228571	virus-like	NA	1	7	2	1	0	Medium-quality	72.26	AAI-based (high-confidence)	NA
Capsule1_12001500	76541	5165	12	4	4	27020	25420	54.14	0	11	60	0	0	0	0	0	0	0	0	0	8	0	6	8	8	46	0.133333	2	0	2	2	0.5	21731	0	21731	5289	0.804256	0.165785	virus-like	NA	1	4	1	1	0	Low-quality	40.92	AAI-based (medium-confidence)	NA
Capsule1_03230519	133781	5235	11	5	5	26644	24644	38.6	0	11	40	0	0	0	0	0	0	0	0	0	13	0	7	13	13	20	0.325	2	2	1	4	0.8	21729	3896	25625	1019	0.961755	0.337924	virus-like	NA	0	5	0	0	0	Medium-quality	68.11	AAI-based (high-confidence)	NA
Capsule1_17190606	198766	4396	2	2	2	21646	20846	33.1	0	11	22	0	0	0	0	0	0	0	0	0	6	0	3	6	6	13	0.272727	2	0	0	2	1	21646	0	21646	0	1	0.272727	virus-like	NA	0	5	0	0	0	Medium-quality	62.13	AAI-based (high-confidence)	NA
Capsule1_17110415	152959	4409	7	4	4	21618	20018	41.58	0	11	43	0	0	0	0	0	0	0	0	0	8	1	4	8	9	30	0.209302	4	0	0	4	1	21618	0	21618	0	1	0.209302	virus-like	NA	0	5	2	0	0	Medium-quality	59.29	AAI-based (high-confidence)	NA
Capsule1_06092106	172840	2983	8	3	3	25264	24064	50.96	0	11	62	0	0	0	0	0	0	0	0	0	7	2	6	7	9	47	0.145161	2	1	0	3	1	21609	3655	25264	0	1	0.145161	virus-like	NA	0	6	4	0	0	Low-quality	36.71	HMM-based (lower-bound)	high kmer_freq may indicate large duplication
Capsule1_03012104	88928	3893	9	5	5	21572	19572	30.91	0	11	43	0	0	0	0	0	0	0	0	0	7	0	6	7	7	30	0.162791	5	0	0	5	1	21572	0	21572	0	1	0.162791	virus-like	NA	0	6	0	1	0	Medium-quality	67.06	AAI-based (high-confidence)	NA
Capsule1_23020205	259195	4385	2	1	1	21564	21164	50.57	0	11	36	0	0	0	0	0	0	0	0	0	13	0	2	13	13	21	0.361111	1	0	0	1	1	21564	0	21564	0	1	0.361111	virus-like	NA	1	5	0	2	1	Low-quality	29.29	HMM-based (lower-bound)	NA
Capsule1_07192100	56556	4107	6	1	1	21547	21147	55.23	0	11	45	0	0	0	0	0	0	0	0	0	7	2	1	7	9	35	0.2	1	0	0	1	1	21547	0	21547	0	1	0.2	virus-like	NA	0	1	1	1	0	Low-quality	32.76	HMM-based (lower-bound)	NA
Capsule1_09020316	74968	4565	9	3	3	21538	20338	42.5	0	11	33	0	0	0	0	0	0	0	0	0	9	2	8	9	11	14	0.333333	3	0	0	3	1	21538	0	21538	0	1	0.333333	virus-like	NA	0	10	0	2	1	Medium-quality	56.22	AAI-based (high-confidence)	NA
Capsule1_02090406	85049	5251	15	9	9	31875	28275	49.05	0	11	49	0	0	0	0	0	0	0	0	1	4	2	9	5	7	33	0.142857	5	4	0	9	1	21527	10348	31875	0	1	0.142857	virus-like	NA	0	4	0	1	0	Medium-quality	53.18	AAI-based (high-confidence)	NA
Capsule1_20230818	334302	5018	16	6	6	23497	21097	39.7	0	11	45	0	0	0	0	0	0	0	0	0	13	0	4	13	13	28	0.288889	5	1	0	6	1	21491	2006	23497	0	1	0.288889	virus-like	NA	0	7	2	3	0	Medium-quality	60.3	AAI-based (high-confidence)	NA
Capsule1_14160915	236356	4424	9	2	2	21472	20672	41.78	0	11	32	0	0	0	0	0	0	0	0	0	8	2	3	8	10	19	0.3125	2	0	0	2	1	21472	0	21472	0	1	0.3125	virus-like	NA	0	3	3	0	0	Medium-quality	58.89	AAI-based (high-confidence)	NA
Capsule1_07102223	115229	4474	8	3	3	22478	21278	47.2	0	11	27	0	0	0	0	0	0	0	0	0	8	0	4	8	8	15	0.296296	2	1	0	3	1	21454	1024	22478	0	1	0.296296	virus-like	NA	0	6	0	0	0	Medium-quality	62.26	AAI-based (high-confidence)	NA
Capsule1_21050921	230615	3803	9	4	4	21446	19846	34.8	0	11	33	0	0	0	0	0	0	0	0	0	10	0	3	10	10	20	0.30303	4	0	0	4	1	21446	0	21446	0	1	0.30303	virus-like	NA	1	1	1	2	1	Medium-quality	75.4	AAI-based (high-confidence)	NA
Capsule1_03171412	179905	4157	8	3	3	21398	20198	46.75	0	11	41	0	0	0	0	0	0	0	0	0	4	0	3	4	4	34	0.097561	3	0	0	3	1	21398	0	21398	0	1	0.097561	virus-like	NA	0	4	1	1	0	Medium-quality	66.26	AAI-based (high-confidence)	NA
Capsule1_15110303	360036	4496	17	5	5	23218	21218	33.39	0	11	24	0	0	0	0	0	0	0	0	1	4	1	2	5	6	16	0.25	4	1	0	5	1	21349	1869	23218	0	1	0.25	virus-like	NA	0	3	0	0	0	Medium-quality	67.72	AAI-based (medium-confidence)	NA
Capsule1_05042223	172281	4975	13	7	7	27500	24700	46.6	0	11	37	0	0	0	0	0	0	0	0	0	8	2	11	8	10	16	0.27027	4	3	0	7	1	21344	6156	27500	0	1	0.27027	virus-like	NA	0	13	1	1	0	Medium-quality	67.54	AAI-based (medium-confidence)	NA
Capsule1_10231515	167702	6864	11	5	5	33780	31780	53.66	0	11	49	0	0	0	0	0	0	0	0	10	8	2	3	18	20	26	0.408163	3	1	1	4	0.8	21309	1053	22362	2921	0.661989	0.616571	virus-like	NA	0	5	2	1	1	Medium-quality	58.71	AAI-based (medium-confidence)	NA
Capsule1_11092003	5713	2574	46	8	8	22612	19412	40.26	0	11	39	0	0	0	0	0	0	0	0	0	9	0	7	9	9	23	0.230769	7	1	0	8	1	21264	1348	22612	0	1	0.230769	virus-like	NA	0	8	0	0	0	Low-quality	35.2	AAI-based (medium-confidence)	NA
Capsule1_14010318	357685	6467	18	5	5	31830	29830	50.95	0	14	30	0	0	0	0	0	0	0	0	0	2	0	7	2	2	21	0.0666667	3	1	1	4	0.8	21241	8939	30180	1650	0.948162	0.0703115	virus-like	NA	0	6	0	1	0	Medium-quality	73.27	AAI-based (high-confidence)	NA
Capsule1_23231812	153861	3650	13	6	6	22324	19924	41.52	0	11	36	0	0	0	0	0	0	0	0	0	13	0	5	13	13	18	0.361111	5	0	1	5	0.833333	21234	0	21234	1090	0.951174	0.379648	virus-like	NA	1	5	3	3	0	Medium-quality	66.09	AAI-based (high-confidence)	NA
Capsule1_12150415	146117	4726	18	7	7	24085	21285	43.15	0	11	44	0	0	0	0	0	0	0	0	0	7	0	5	7	7	32	0.159091	5	1	1	6	0.857143	21101	1535	22636	1449	0.939838	0.169275	virus-like	NA	0	3	2	1	0	Medium-quality	59.77	AAI-based (medium-confidence)	NA
Capsule1_20092012	101939	5445	15	7	7	37832	35032	46.07	0	11	50	0	0	0	0	0	0	0	0	0	6	1	28	6	7	15	0.14	4	3	0	7	1	21080	16752	37832	0	1	0.14	virus-like	NA	0	15	0	2	0	Medium-quality	88.25	AAI-based (high-confidence)	NA
Capsule1_11130923	243214	4281	16	5	5	21052	19052	49.82	0	11	28	0	0	0	0	0	0	0	0	0	6	0	4	6	6	18	0.214286	5	0	0	5	1	21052	0	21052	0	1	0.214286	virus-like	NA	0	6	0	1	0	Medium-quality	64.06	AAI-based (high-confidence)	NA
Capsule1_20202003	280299	4673	5	2	2	22264	21464	50.82	0	11	29	0	0	0	0	0	0	0	0	0	8	0	3	8	8	18	0.275862	1	1	0	2	1	21020	1244	22264	0	1	0.275862	virus-like	NA	0	5	0	0	0	Medium-quality	66.26	AAI-based (high-confidence)	NA
Capsule1_16070304	111822	4314	11	5	5	21005	19005	38.81	0	11	18	0	0	0	0	0	0	0	0	0	6	1	3	6	7	8	0.388889	5	0	0	5	1	21005	0	21005	0	1	0.388889	virus-like	NA	1	7	0	0	0	Medium-quality	52.35	AAI-based (medium-confidence)	NA
Capsule1_03222006	192852	3287	17	6	6	22367	19967	44.08	0	11	30	0	0	0	0	0	0	0	0	1	6	1	4	7	8	18	0.266667	5	1	0	6	1	20996	1371	22367	0	1	0.266667	virus-like	NA	0	8	1	0	2	Medium-quality	62.08	AAI-based (high-confidence)	NA
Capsule1_17200523	134536	6587	13	6	6	42048	39648	58.74	0	11	57	0	0	0	0	0	0	0	0	0	16	0	7	16	16	34	0.280702	4	2	0	6	1	20925	21123	42048	0	1	0.280702	virus-like	NA	0	8	0	0	1	Medium-quality	70.47	AAI-based (medium-confidence)	NA
Capsule1_16211812	16255	3637	7	3	3	20863	19663	32.76	0	11	23	0	0	0	0	0	0	0	0	0	8	0	1	8	8	14	0.347826	3	0	0	3	1	20863	0	20863	0	1	0.347826	virus-like	NA	1	4	0	0	0	Medium-quality	59.21	AAI-based (high-confidence)	NA
Capsule1_23191303	390469	4999	26	7	7	24216	21416	36.85	0	11	30	0	0	0	0	0	0	0	0	2	5	0	4	7	7	19	0.233333	5	2	0	7	1	20853	3363	24216	0	1	0.233333	virus-like	NA	1	5	0	1	2	Medium-quality	66.16	AAI-based (high-confidence)	NA
Capsule1_10141721	135037	3985	12	4	4	22210	20610	37.16	0	11	27	0	0	0	0	0	0	0	0	0	6	0	1	6	6	20	0.222222	3	0	1	3	0.75	20846	0	20846	1364	0.938586	0.236763	virus-like	NA	0	1	0	1	0	Low-quality	32.8	AAI-based (high-confidence)	NA
Capsule1_23100919	82637	3870	5	2	2	22021	21221	55.56	0	3	21	0	0	0	0	0	0	0	0	0	4	1	2	4	5	14	0.238095	1	0	1	1	0.5	20823	0	20823	1198	0.945597	0.251793	virus-like	NA	0	0	1	0	1	Medium-quality	56.94	AAI-based (high-confidence)	NA
Capsule1_14032012	94759	6436	29	7	7	32790	29990	43.5	0	14	41	0	0	0	0	0	0	0	0	1	5	0	7	6	6	28	0.146341	4	3	0	7	1	20811	11979	32790	0	1	0.146341	virus-like	NA	0	7	1	0	0	Low-quality	33.86	AAI-based (high-confidence)	NA
Capsule1_19230717	164841	4430	18	5	5	22325	20325	32.76	0	11	38	0	0	0	0	0	0	0	0	0	12	0	2	12	12	24	0.315789	4	1	0	5	1	20761	1564	22325	0	1	0.315789	virus-like	NA	0	4	1	0	0	Medium-quality	75.6	AAI-based (high-confidence)	NA
Capsule1_00121109	282418	4331	8	3	3	20760	19560	32.76	0	11	23	0	0	0	0	0	0	0	0	0	11	0	5	11	11	7	0.478261	3	0	0	3	1	20760	0	20760	0	1	0.478261	virus-like	NA	0	7	0	0	0	Medium-quality	58.08	AAI-based (high-confidence)	NA
Capsule1_00202121	11976	4804	21	7	7	33322	30522	46.46	0	11	33	0	0	0	0	0	0	0	0	1	3	0	5	4	4	24	0.121212	3	4	0	7	1	20749	12573	33322	0	1	0.121212	virus-like	NA	0	5	0	0	1	Medium-quality	61.56	AAI-based (medium-confidence)	NA
Capsule1_20170410	82131	4022	17	7	7	23687	20887	44.59	0	11	30	0	0	0	0	0	0	0	0	0	5	1	5	5	6	19	0.2	5	2	0	7	1	20718	2969	23687	0	1	0.2	virus-like	NA	0	5	0	0	0	Medium-quality	69.57	AAI-based (high-confidence)	NA
Capsule1_06090507	180787	3760	29	7	7	20696	17896	37.57	0	11	28	0	0	0	0	0	0	0	0	0	4	0	2	4	4	22	0.142857	7	0	0	7	1	20696	0	20696	0	1	0.142857	virus-like	NA	0	2	1	0	0	Low-quality	33.58	AAI-based (high-confidence)	NA
Capsule1_12230013	187404	3682	10	4	4	20615	19015	34.66	0	11	33	0	0	0	0	0	0	0	0	0	11	1	4	11	12	17	0.363636	4	0	0	4	1	20615	0	20615	0	1	0.363636	virus-like	NA	0	5	0	0	0	Medium-quality	57.13	AAI-based (high-confidence)	NA
Capsule1_17130006	103347	5627	32	4	4	22845	21245	33.64	0	11	36	0	0	0	0	0	0	0	0	0	12	2	3	12	14	19	0.388889	3	1	0	4	1	20598	2247	22845	0	1	0.388889	virus-like	NA	0	3	0	0	1	Low-quality	39.27	AAI-based (high-confidence)	NA
Capsule1_05161118	287423	4143	4	2	2	20581	19781	32.09	0	11	24	0	0	0	0	0	0	0	0	0	7	0	1	7	7	16	0.291667	2	0	0	2	1	20581	0	20581	0	1	0.291667	virus-like	NA	0	5	0	0	0	Medium-quality	60.29	AAI-based (high-confidence)	NA
Capsule1_09142320	227540	4635	11	5	5	21614	19614	42.73	0	11	34	0	0	0	0	0	0	0	0	0	8	0	3	8	8	23	0.235294	4	1	0	5	1	20575	1039	21614	0	1	0.235294	virus-like	NA	0	3	1	0	0	Medium-quality	59.38	AAI-based (medium-confidence)	NA
Capsule1_23220612	387620	4265	3	1	1	20549	20149	37.31	0	11	23	0	0	0	0	0	0	0	0	0	0	2	1	0	2	20	0.0869565	1	0	0	1	1	20549	0	20549	0	1	0.0869565	virus-like	NA	0	0	0	0	0	High-quality	100	AAI-based (medium-confidence)	NA
Capsule1_00070623	119103	6343	14	4	4	32468	30868	47.67	0	11	44	0	0	0	0	0	0	0	0	0	5	1	4	5	6	34	0.136364	3	1	0	4	1	20545	11923	32468	0	1	0.136364	virus-like	NA	0	3	0	0	0	Medium-quality	56	AAI-based (high-confidence)	NA
Capsule1_13151808	67134	4672	17	8	8	23390	20190	33.56	0	11	31	0	0	0	0	0	0	0	0	0	7	0	6	7	7	18	0.225806	6	1	1	7	0.875	20537	1060	21597	1793	0.923343	0.244553	virus-like	NA	0	6	1	1	1	Low-quality	27.78	HMM-based (lower-bound)	NA
Capsule1_21161509	294022	4733	17	4	4	23647	22047	50.56	0	11	40	0	0	0	0	0	0	0	0	0	9	0	6	9	9	25	0.225	2	2	0	4	1	20535	3112	23647	0	1	0.225	virus-like	NA	0	4	2	1	0	Medium-quality	51.3	AAI-based (medium-confidence)	NA
Capsule1_10121307	458754	4134	10	5	5	25926	23926	41.78	0	11	36	0	0	0	0	0	0	0	0	0	13	0	3	13	13	20	0.361111	3	2	0	5	1	20510	4807	25317	0	0.97651	0.369798	virus-like	NA	0	5	1	1	0	Medium-quality	75.77	AAI-based (high-confidence)	NA
Capsule1_00010921	163008	5807	17	5	5	31265	29265	70.72	0	11	51	0	0	0	0	0	0	0	0	1	8	0	8	9	9	34	0.176471	2	3	0	5	1	20508	10757	31265	0	1	0.176471	virus-like	NA	0	6	1	1	0	Medium-quality	67	AAI-based (medium-confidence)	NA
Capsule1_03161821	100583	4303	13	6	6	22215	19815	33.81	0	1	32	0	0	0	0	0	0	0	0	0	1	2	4	1	3	25	0.09375	5	1	0	6	1	20496	1719	22215	0	1	0.09375	virus-like	NA	0	1	0	1	1	Low-quality	19.34	HMM-based (lower-bound)	NA
Capsule1_11152317	103888	4185	11	5	5	20459	18459	35.06	0	11	34	0	0	0	0	0	0	0	0	0	10	0	4	10	10	20	0.294118	5	0	0	5	1	20459	0	20459	0	1	0.294118	virus-like	NA	0	4	1	1	0	Medium-quality	72.05	AAI-based (high-confidence)	NA
Capsule1_01111515	319068	3737	11	5	5	20456	18456	44.87	0	11	22	0	0	0	0	0	0	0	0	0	10	0	3	10	10	9	0.454545	5	0	0	5	1	20456	0	20456	0	1	0.454545	virus-like	NA	0	5	1	1	0	Medium-quality	63.04	AAI-based (medium-confidence)	NA
Capsule1_00202118	177153	4700	25	9	9	41855	38255	35.84	0	11	57	0	0	0	0	0	0	0	0	2	7	3	21	9	12	24	0.210526	6	3	0	9	1	20440	21415	41855	0	1	0.210526	virus-like	NA	0	10	2	0	0	Low-quality	11.79	AAI-based (medium-confidence)	high kmer_freq may indicate large duplication
Capsule1_02191223	223777	4194	6	2	2	20438	19638	36.67	0	11	33	0	0	0	0	0	0	0	0	0	13	1	2	13	14	17	0.424242	2	0	0	2	1	20438	0	20438	0	1	0.424242	virus-like	NA	0	4	0	2	1	Medium-quality	62.08	AAI-based (medium-confidence)	NA
Capsule1_20201718	136248	2857	4	4	4	20341	18741	37.02	0	11	20	0	0	0	0	0	0	0	0	0	6	2	1	6	8	11	0.4	4	0	0	4	1	20341	0	20341	0	1	0.4	virus-like	NA	0	1	2	0	0	Medium-quality	60.08	AAI-based (high-confidence)	high kmer_freq may indicate large duplication
Capsule1_15092003	5462	2437	47	8	8	21425	18225	40.06	0	11	38	0	0	0	0	0	0	0	0	0	10	0	9	10	10	19	0.263158	7	1	0	8	1	20321	1104	21425	0	1	0.263158	virus-like	NA	0	9	0	0	0	Low-quality	32.33	AAI-based (medium-confidence)	NA
Capsule1_03231322	133777	4540	9	5	5	26148	24148	46.52	0	11	53	0	0	0	0	0	0	0	0	0	9	1	7	9	10	36	0.188679	4	1	0	5	1	20281	5867	26148	0	1	0.188679	virus-like	NA	0	5	4	2	0	High-quality	93.66	AAI-based (medium-confidence)	NA
Capsule1_05231223	436063	4508	6	3	3	22394	21194	39.37	0	11	32	0	0	0	0	0	0	0	0	0	10	1	4	10	11	17	0.34375	2	1	0	3	1	20263	2131	22394	0	1	0.34375	virus-like	NA	0	6	2	2	0	Medium-quality	68.87	AAI-based (medium-confidence)	NA
Capsule1_05151909	161247	4134	11	5	5	20249	18249	34.29	0	11	38	0	0	0	0	0	0	0	0	1	8	0	5	9	9	24	0.236842	5	0	0	5	1	20249	0	20249	0	1	0.236842	virus-like	NA	0	7	0	2	0	Medium-quality	64.61	AAI-based (high-confidence)	low-confidence DTR
Capsule1_05030814	190881	3947	5	4	4	20200	18600	29.87	0	11	38	0	0	0	0	0	0	0	0	0	8	1	5	8	9	24	0.236842	4	0	0	4	1	20200	0	20200	0	1	0.236842	virus-like	NA	1	4	2	1	0	Medium-quality	61.61	AAI-based (high-confidence)	NA
Capsule1_09081921	277776	4463	14	4	4	20189	18589	48.1	0	11	36	0	0	0	0	0	0	0	0	0	15	0	3	15	15	18	0.416667	4	0	0	4	1	20189	0	20189	0	1	0.416667	virus-like	NA	1	5	1	0	0	Medium-quality	64.8	AAI-based (high-confidence)	NA
Capsule1_00172022	106063	4295	8	4	4	22008	20408	53.55	0	11	31	0	0	0	0	0	0	0	0	0	4	2	5	4	6	20	0.193548	3	1	0	4	1	20129	1879	22008	0	1	0.193548	virus-like	NA	0	5	2	1	1	Low-quality	25.88	HMM-based (lower-bound)	NA
Capsule1_13081812	286656	4458	22	7	7	24447	21647	37.64	0	11	30	0	0	0	0	0	0	0	0	0	7	0	3	7	7	20	0.233333	6	1	0	7	1	20114	4333	24447	0	1	0.233333	virus-like	NA	0	6	1	0	0	Low-quality	39.9	AAI-based (high-confidence)	NA
Capsule1_14161203	280694	4955	19	6	6	31664	29264	43.59	0	11	42	0	0	0	0	0	0	0	0	1	11	2	4	12	14	24	0.333333	2	3	1	5	0.833333	20107	10424	30531	1133	0.964218	0.345703	virus-like	NA	1	6	2	1	1	Medium-quality	52.76	AAI-based (medium-confidence)	NA
Capsule1_01200421	7559	3548	121	13	13	23397	18197	53.82	0	11	44	0	0	0	0	0	0	0	0	0	9	1	9	9	10	25	0.227273	11	2	0	13	1	20045	3352	23397	0	1	0.227273	virus-like	NA	0	2	1	0	1	Low-quality	25.34	HMM-based (lower-bound)	NA
Capsule1_05200717	142390	4729	17	5	5	21433	19433	42.84	0	11	31	0	0	0	0	0	0	0	0	0	11	0	5	11	11	15	0.354839	4	0	1	4	0.8	20045	0	20045	1388	0.93524	0.379409	virus-like	NA	0	8	0	1	0	Medium-quality	54.38	AAI-based (high-confidence)	NA
Capsule1_08170004	72209	3968	16	5	5	23849	21849	31.2	0	11	48	0	0	0	0	0	0	0	0	0	11	0	5	11	11	32	0.229167	3	2	0	5	1	19935	3914	23849	0	1	0.229167	virus-like	NA	0	4	1	0	2	Medium-quality	74.96	AAI-based (high-confidence)	NA
Capsule1_18020416	45429	4025	5	4	4	24059	22459	30.68	0	11	43	0	0	0	0	0	0	0	0	0	8	0	8	8	8	27	0.186047	3	1	0	4	1	19930	4129	24059	0	1	0.186047	virus-like	NA	0	8	1	0	0	Medium-quality	74.53	AAI-based (high-confidence)	NA
Capsule1_15222212	228727	4083	5	1	1	19916	19516	32.3	0	11	26	0	0	0	0	0	0	0	0	0	8	0	6	8	8	12	0.307692	1	0	0	1	1	19916	0	19916	0	1	0.307692	virus-like	NA	0	7	0	0	0	Medium-quality	62.82	AAI-based (high-confidence)	NA
Capsule1_02211509	236249	6409	7	3	3	30422	29222	50.22	0	11	46	0	0	0	0	0	0	0	0	1	10	2	4	11	13	29	0.282609	1	2	0	3	1	19904	10518	30422	0	1	0.282609	virus-like	NA	1	5	1	3	0	Low-quality	46.5	HMM-based (lower-bound)	NA
Capsule1_06080119	109684	4773	23	5	5	19803	17803	54.49	0	11	34	0	0	0	0	0	0	0	0	0	3	1	7	3	4	23	0.117647	5	0	0	5	1	19803	0	19803	0	1	0.117647	virus-like	NA	0	5	2	0	0	Medium-quality	54.6	AAI-based (medium-confidence)	NA
Capsule1_04071007	398996	3927	8	3	3	19796	18596	42.6	0	11	34	0	0	0	0	0	0	0	0	0	6	1	8	6	7	19	0.205882	3	0	0	3	1	19796	0	19796	0	1	0.205882	virus-like	NA	0	8	1	1	1	Medium-quality	55.9	AAI-based (high-confidence)	NA
Capsule1_08170609	216619	5793	6	2	2	29871	29071	33.59	0	11	44	0	0	0	0	0	0	0	0	1	7	0	6	8	8	30	0.181818	1	1	0	2	1	19741	10130	29871	0	1	0.181818	virus-like	NA	0	4	1	0	0	Medium-quality	77.42	AAI-based (high-confidence)	NA
Capsule1_01170708	6111	2493	16	8	8	19723	16523	31.22	0	11	33	0	0	0	0	0	0	0	0	0	8	0	4	8	8	21	0.242424	8	0	0	8	1	19723	0	19723	0	1	0.242424	virus-like	NA	0	8	1	0	0	Medium-quality	63.65	AAI-based (high-confidence)	NA
Capsule1_05170703	316691	4177	5	2	2	20861	20061	32.4	0	11	21	0	0	0	0	0	0	0	0	0	8	0	5	8	8	8	0.380952	1	1	0	2	1	19633	1228	20861	0	1	0.380952	virus-like	NA	0	6	0	1	0	Medium-quality	59.89	AAI-based (high-confidence)	NA
Capsule1_18080008	21550	3224	3	1	1	19632	19232	56.02	0	11	33	0	0	0	0	0	0	0	0	0	6	1	2	6	7	24	0.212121	1	0	0	1	1	19632	0	19632	0	1	0.212121	virus-like	NA	1	2	2	2	1	Low-quality	28.57	HMM-based (lower-bound)	NA
Capsule1_19230511	250166	3745	6	3	3	20677	19477	34.73	0	11	31	0	0	0	0	0	0	0	0	0	5	2	8	5	7	16	0.225806	2	1	0	3	1	19579	1098	20677	0	1	0.225806	virus-like	NA	0	9	0	0	0	Medium-quality	64.01	AAI-based (medium-confidence)	NA
Capsule1_15110922	75891	3819	18	5	5	19556	17556	31.25	0	11	26	0	0	0	0	0	0	0	0	0	6	0	6	6	6	14	0.230769	5	0	0	5	1	19556	0	19556	0	1	0.230769	virus-like	NA	0	1	1	0	0	Low-quality	12.04	AAI-based (medium-confidence)	NA
Capsule1_16101815	49588	3898	19	6	6	20715	18315	43.4	0	11	39	0	0	0	0	0	0	0	0	1	6	1	5	7	8	26	0.205128	5	0	1	5	0.833333	19499	0	19499	1216	0.941299	0.21792	virus-like	NA	0	4	1	1	0	Low-quality	41.81	AAI-based (high-confidence)	NA
Capsule1_09081803	275672	4042	19	4	4	19478	17878	36.42	0	11	29	0	0	0	0	0	0	0	0	1	7	1	6	8	9	14	0.310345	4	0	0	4	1	19478	0	19478	0	1	0.310345	virus-like	NA	0	5	3	0	0	Low-quality	30.59	AAI-based (high-confidence)	NA
Capsule1_08130617	294118	3631	11	2	2	19470	18670	46.46	0	11	19	0	0	0	0	0	0	0	0	0	2	0	11	2	2	6	0.105263	2	0	0	2	1	19470	0	19470	0	1	0.105263	virus-like	NA	0	10	0	0	0	Low-quality	48.27	AAI-based (medium-confidence)	NA
Capsule1_21140315	149764	3552	10	3	3	19460	18260	34.68	0	11	31	0	0	0	0	0	0	0	0	0	8	0	5	8	8	18	0.258065	3	0	0	3	1	19460	0	19460	0	1	0.258065	virus-like	NA	0	7	0	0	0	Medium-quality	61.5	AAI-based (high-confidence)	NA
Capsule1_19131912	66728	2404	15	5	5	20513	18513	36.93	0	11	35	0	0	0	0	0	0	0	0	0	10	2	10	10	12	13	0.342857	4	1	0	5	1	19432	1081	20513	0	1	0.342857	virus-like	NA	0	7	0	0	0	Medium-quality	56.63	AAI-based (high-confidence)	high kmer_freq may indicate large duplication
Capsule1_05140909	433620	4164	13	4	4	19396	17796	40.74	0	11	25	0	0	0	0	0	0	0	0	0	1	0	3	1	1	21	0.04	4	0	0	4	1	19396	0	19396	0	1	0.04	virus-like	NA	0	2	0	2	0	Medium-quality	68.92	AAI-based (medium-confidence)	NA
Capsule1_17112222	187970	4498	14	5	5	22573	20573	54.79	0	11	39	0	0	0	0	0	0	0	0	1	3	1	4	4	5	30	0.128205	3	2	0	5	1	19396	3177	22573	0	1	0.128205	virus-like	NA	0	4	1	0	1	Low-quality	34.34	HMM-based (lower-bound)	NA
Capsule1_23110021	98098	4018	14	5	5	21596	19596	44.26	0	11	25	0	0	0	0	0	0	0	0	0	7	1	5	7	8	12	0.32	4	1	0	5	1	19394	2202	21596	0	1	0.32	virus-like	NA	0	7	0	0	0	Medium-quality	53.68	AAI-based (high-confidence)	NA
Capsule1_14081615	158850	4147	10	3	3	25612	24412	45.1	0	11	40	0	0	0	0	0	0	0	0	2	1	1	6	3	4	30	0.1	2	1	0	3	1	19367	6245	25612	0	1	0.1	virus-like	NA	0	2	2	2	0	Medium-quality	71.36	AAI-based (high-confidence)	NA
Capsule1_18151807	365013	3755	12	7	7	25898	23098	31.09	0	11	50	0	0	0	0	0	0	0	0	0	9	3	6	9	12	32	0.24	4	2	1	6	0.857143	19361	4933	24294	1604	0.938065	0.255846	virus-like	NA	2	5	1	0	2	Medium-quality	61.35	AAI-based (medium-confidence)	NA
Capsule1_12142110	114234	4378	17	6	6	25637	23237	31.93	0	11	51	0	0	0	0	0	0	0	0	1	8	0	6	9	9	36	0.176471	4	2	0	6	1	19344	6293	25637	0	1	0.176471	virus-like	NA	1	7	0	0	0	Medium-quality	72.83	AAI-based (high-confidence)	NA
Capsule1_05131006	185368	5693	14	6	6	28230	25830	40.74	0	11	36	0	0	0	0	0	0	0	0	0	2	1	15	2	3	18	0.0833333	4	2	0	6	1	19327	8903	28230	0	1	0.0833333	virus-like	NA	0	5	2	1	0	Medium-quality	67.38	AAI-based (high-confidence)	NA
Capsule1_17040103	117184	4145	16	6	6	24357	21957	56.59	0	11	31	0	0	0	0	0	0	0	0	0	6	0	0	6	6	25	0.193548	3	2	1	5	0.833333	19305	2801	22106	2251	0.907583	0.213257	virus-like	NA	0	4	1	0	0	Medium-quality	58.63	AAI-based (high-confidence)	NA
Capsule1_10121718	277913	4094	14	6	6	23602	21202	43.34	0	11	39	0	0	0	0	0	0	0	0	0	10	0	2	10	10	27	0.25641	5	1	0	6	1	19274	4328	23602	0	1	0.25641	virus-like	NA	0	4	2	0	0	Medium-quality	65.05	AAI-based (high-confidence)	NA
Capsule1_17171116	90866	4611	7	3	3	23670	22470	56.91	0	11	40	0	0	0	0	0	0	0	0	2	2	1	2	4	5	33	0.125	2	1	0	3	1	19245	4425	23670	0	1	0.125	virus-like	NA	0	2	0	0	0	Low-quality	25.06	HMM-based (lower-bound)	NA
Capsule1_20112318	384973	4144	12	3	3	20504	19304	35.27	0	11	44	0	0	0	0	0	0	0	0	0	5	1	3	5	6	35	0.136364	2	1	0	3	1	19214	1290	20504	0	1	0.136364	virus-like	NA	1	2	0	0	0	Medium-quality	55.42	AAI-based (medium-confidence)	NA
Capsule1_13091907	194804	3995	10	5	5	19182	17182	41.89	0	11	28	0	0	0	0	0	0	0	0	0	6	0	3	6	6	19	0.214286	5	0	0	5	1	19182	0	19182	0	1	0.214286	virus-like	NA	0	3	1	0	0	Medium-quality	53.17	AAI-based (high-confidence)	NA
Capsule1_23170019	128350	4566	8	3	3	20628	19428	50.13	0	11	24	0	0	0	0	0	0	0	0	0	9	0	4	9	9	11	0.375	2	1	0	3	1	19176	1452	20628	0	1	0.375	virus-like	NA	1	5	0	1	1	Medium-quality	62.33	AAI-based (medium-confidence)	NA
Capsule1_06080616	74434	3173	10	5	5	19172	17172	33.82	0	11	32	0	0	0	0	0	0	0	0	0	6	0	4	6	6	22	0.1875	5	0	0	5	1	19172	0	19172	0	1	0.1875	virus-like	NA	0	4	0	0	1	Medium-quality	52.67	AAI-based (high-confidence)	NA
Capsule1_18181511	156922	4449	14	2	2	20359	19559	52.14	0	11	23	0	0	0	0	0	0	0	0	0	3	0	0	3	3	20	0.130435	1	1	0	2	1	19156	1203	20359	0	1	0.130435	virus-like	NA	0	0	0	0	0	Medium-quality	52.63	AAI-based (high-confidence)	NA
Capsule1_05022103	13301	3511	12	4	4	21469	19869	39.51	0	11	16	0	0	0	0	0	0	0	0	0	2	1	1	2	3	12	0.1875	3	1	0	4	1	19144	2325	21469	0	1	0.1875	virus-like	NA	0	1	0	0	0	Low-quality	33.32	AAI-based (medium-confidence)	NA
Capsule1_03051904	175908	3561	4	3	3	19141	17941	32.68	0	11	22	0	0	0	0	0	0	0	0	0	7	0	1	7	7	14	0.318182	3	0	0	3	1	19141	0	19141	0	1	0.318182	virus-like	NA	1	3	0	0	0	Medium-quality	54.99	AAI-based (high-confidence)	NA
Capsule1_18041815	68996	3904	9	5	5	20410	18410	33	0	11	37	0	0	0	0	0	0	0	0	0	13	0	3	13	13	21	0.351351	4	1	0	5	1	19121	1289	20410	0	1	0.351351	virus-like	NA	0	8	0	0	0	Low-quality	49.39	AAI-based (high-confidence)	NA
Capsule1_12140815	150240	6557	16	5	5	35437	33437	47.9	0	11	45	0	0	0	0	0	0	0	0	1	7	1	1	8	9	35	0.2	3	2	0	5	1	19113	16324	35437	0	1	0.2	virus-like	NA	0	0	1	1	1	Medium-quality	62.37	AAI-based (high-confidence)	NA
Capsule1_01111812	158041	3698	10	5	5	21421	19421	45.68	0	11	31	0	0	0	0	0	0	0	0	0	2	1	3	2	3	25	0.0967742	3	2	0	5	1	19050	2371	21421	0	1	0.0967742	virus-like	NA	0	1	1	0	0	Medium-quality	63.79	AAI-based (high-confidence)	NA
Capsule1_02131803	222928	4064	20	5	5	20598	18598	46.47	0	11	42	0	0	0	0	0	0	0	0	0	9	1	1	9	10	31	0.238095	4	1	0	5	1	19030	1568	20598	0	1	0.238095	virus-like	NA	0	4	0	1	2	Low-quality	23.82	HMM-based (lower-bound)	NA
Capsule1_09160622	143874	6147	8	2	2	33822	33022	32.61	0	11	44	0	0	0	0	0	0	0	0	1	7	2	6	8	10	28	0.227273	1	1	0	2	1	19029	14793	33822	0	1	0.227273	virus-like	NA	0	2	1	0	0	Medium-quality	70.51	AAI-based (medium-confidence)	NA
Capsule1_00190909	6172	2431	39	9	9	22944	19344	36.85	0	11	30	0	0	0	0	0	0	0	0	0	6	0	5	6	6	19	0.2	7	1	1	8	0.888889	18993	2821	21814	1130	0.95075	0.21036	virus-like	NA	0	0	0	0	0	Low-quality	36.32	AAI-based (high-confidence)	NA
Capsule1_03221017	171686	3852	8	4	4	18990	17390	38.4	0	11	30	0	0	0	0	0	0	0	0	0	15	0	5	15	15	10	0.5	4	0	0	4	1	18990	0	18990	0	1	0.5	virus-like	NA	0	5	0	1	0	Low-quality	49.76	AAI-based (medium-confidence)	NA
Capsule1_11140315	148805	4399	22	9	9	23394	19794	45	0	11	37	0	0	0	0	0	0	0	0	0	5	0	8	5	5	24	0.135135	5	3	1	8	0.888889	18955	3359	22314	1080	0.953834	0.141676	virus-like	NA	1	4	2	1	0	Medium-quality	74.9	AAI-based (high-confidence)	NA
Capsule1_03051519	191961	4283	19	5	5	20346	18346	36.68	0	11	35	0	0	0	0	0	0	0	0	0	9	0	2	9	9	24	0.257143	4	1	0	5	1	18921	1425	20346	0	1	0.257143	virus-like	NA	0	4	0	0	0	Low-quality	33.46	AAI-based (high-confidence)	NA
Capsule1_02080603	188322	3807	11	3	3	18908	17708	45.93	0	11	18	0	0	0	0	0	0	0	0	0	4	0	1	4	4	13	0.222222	3	0	0	3	1	18908	0	18908	0	1	0.222222	virus-like	NA	0	2	0	0	0	Medium-quality	52.38	AAI-based (medium-confidence)	NA
Capsule1_12220813	181374	3221	9	4	4	18906	17306	41.94	0	11	33	0	0	0	0	0	0	0	0	0	6	0	6	6	6	21	0.181818	4	0	0	4	1	18906	0	18906	0	1	0.181818	virus-like	NA	0	7	0	0	0	Medium-quality	53.15	AAI-based (high-confidence)	NA
Capsule1_13092003	7040	2964	42	8	8	22890	19690	40.3	0	11	39	0	0	0	0	0	0	0	0	0	10	0	7	10	10	22	0.25641	6	2	0	8	1	18888	4002	22890	0	1	0.25641	virus-like	NA	0	11	0	0	0	Low-quality	38.16	AAI-based (medium-confidence)	NA
Capsule1_01170617	148409	4172	8	3	3	18850	17650	43.13	0	11	29	0	0	0	0	0	0	0	0	0	4	0	8	4	4	17	0.137931	3	0	0	3	1	18850	0	18850	0	1	0.137931	virus-like	NA	0	6	2	0	0	Medium-quality	54.57	AAI-based (high-confidence)	NA
Capsule1_23170514	161816	4272	29	7	7	28086	25286	36.46	0	11	31	0	0	0	0	0	0	0	0	0	4	1	12	4	5	14	0.16129	5	2	0	7	1	18774	9312	28086	0	1	0.16129	virus-like	NA	0	7	2	0	0	Low-quality	29.98	HMM-based (lower-bound)	NA
Capsule1_09160321	95535	3958	15	5	5	20523	18523	35.38	0	11	42	0	0	0	0	0	0	0	0	0	5	0	6	5	5	31	0.119048	4	1	0	5	1	18746	1777	20523	0	1	0.119048	virus-like	NA	0	4	1	1	0	Medium-quality	53.02	AAI-based (high-confidence)	NA
Capsule1_18231703	79918	3674	12	4	4	21872	20272	52.79	0	11	37	0	0	0	0	0	0	0	0	0	9	0	4	9	9	24	0.243243	3	1	0	4	1	18739	3133	21872	0	1	0.243243	virus-like	NA	1	2	1	0	0	Medium-quality	54.05	AAI-based (medium-confidence)	NA
Capsule1_19191103	305544	5552	18	10	10	38655	34655	54.65	0	11	59	0	0	0	0	0	0	0	0	0	11	0	2	11	11	46	0.186441	3	7	0	10	1	18647	20008	38655	0	1	0.186441	virus-like	NA	1	5	0	0	1	Medium-quality	88.43	AAI-based (medium-confidence)	NA
Capsule1_21102100	145160	4498	12	5	5	26635	24635	34.86	0	11	31	0	0	0	0	0	0	0	0	0	7	0	1	7	7	23	0.225806	2	2	1	4	0.8	18645	6971	25616	1019	0.961742	0.234789	virus-like	NA	0	1	0	0	1	Medium-quality	71.3	AAI-based (medium-confidence)	NA
Capsule1_04142318	181572	3887	8	4	4	18635	17035	33.32	0	11	31	0	0	0	0	0	0	0	0	1	9	0	3	10	10	18	0.322581	4	0	0	4	1	18635	0	18635	0	1	0.322581	virus-like	NA	0	5	0	0	2	Medium-quality	58.31	AAI-based (high-confidence)	NA
Capsule1_15192004	82229	4182	17	4	4	21800	20200	43.65	0	11	33	0	0	0	0	0	0	0	0	0	9	0	6	9	9	18	0.272727	2	1	1	3	0.75	18592	2068	20660	1140	0.947706	0.287776	virus-like	NA	0	9	0	0	1	Medium-quality	65.63	AAI-based (high-confidence)	NA
Capsule1_19171603	94064	2990	15	5	5	20159	18159	36.47	0	11	49	0	0	0	0	0	0	0	0	0	12	0	6	12	12	31	0.244898	4	1	0	5	1	18592	1567	20159	0	1	0.244898	virus-like	NA	0	5	0	0	0	Medium-quality	52.46	AAI-based (high-confidence)	NA
Capsule1_06232209	235731	3827	21	6	6	22873	20473	33.71	0	11	34	0	0	0	0	0	0	0	0	0	13	0	5	13	13	16	0.382353	3	2	1	5	0.833333	18576	3194	21770	1103	0.951777	0.401725	virus-like	NA	1	8	1	0	1	Medium-quality	59.88	AAI-based (medium-confidence)	NA
Capsule1_16141716	28637	3160	5	4	4	18568	16968	31.8	0	11	38	0	0	0	0	0	0	0	0	0	7	0	3	7	7	28	0.184211	4	0	0	4	1	18568	0	18568	0	1	0.184211	virus-like	NA	0	2	0	1	0	Low-quality	49.21	AAI-based (high-confidence)	NA
Capsule1_18060518	291239	4690	14	4	4	21851	20251	38.74	0	11	36	0	0	0	0	0	0	0	0	0	4	0	10	4	4	22	0.111111	2	2	0	4	1	18502	3349	21851	0	1	0.111111	virus-like	NA	0	6	0	0	0	Medium-quality	61.2	AAI-based (high-confidence)	NA
Capsule1_06050812	67161	3599	14	3	3	18466	17266	46.11	0	11	22	0	0	0	0	0	0	0	0	0	6	1	3	6	7	12	0.318182	3	0	0	3	1	18466	0	18466	0	1	0.318182	virus-like	NA	0	3	2	0	0	Medium-quality	51.44	AAI-based (high-confidence)	NA
Capsule1_23111807	315283	3983	10	5	5	18446	16446	33.15	0	11	35	0	0	0	0	0	0	0	0	0	6	1	6	6	7	22	0.2	5	0	0	5	1	18446	0	18446	0	1	0.2	virus-like	NA	0	2	1	0	1	Medium-quality	50.82	AAI-based (high-confidence)	NA
Capsule1_02140103	168431	6137	17	4	4	27739	26139	60.49	0	11	49	0	0	0	0	0	0	0	0	0	3	0	3	3	3	43	0.0612245	2	1	1	3	0.75	18333	8242	26575	1164	0.958037	0.0639062	virus-like	NA	0	4	0	0	0	Medium-quality	54.8	AAI-based (medium-confidence)	NA
Capsule1_20201522	122169	4434	13	4	4	21231	19631	52.59	0	11	29	0	0	0	0	0	0	0	0	0	6	1	5	6	7	17	0.241379	2	2	0	4	1	18320	2911	21231	0	1	0.241379	virus-like	NA	0	7	1	1	0	Low-quality	29.86	HMM-based (lower-bound)	NA
Capsule1_03200716	276773	3914	17	7	7	19797	16997	43.11	0	11	29	0	0	0	0	0	0	0	0	0	6	1	6	6	7	16	0.241379	6	1	0	7	1	18313	1484	19797	0	1	0.241379	virus-like	NA	0	9	0	0	0	Medium-quality	51.14	AAI-based (high-confidence)	NA
Capsule1_15231510	300637	4179	36	10	10	23417	19417	38.38	0	11	46	0	0	0	0	0	0	0	0	0	4	2	3	4	6	37	0.130435	6	2	2	8	0.8	18291	2512	20803	2614	0.888372	0.146825	virus-like	NA	0	1	0	0	0	Low-quality	39.88	AAI-based (medium-confidence)	no viral genes detected
Capsule1_23130011	229372	4057	6	3	3	19347	18147	48.08	0	11	24	0	0	0	0	0	0	0	0	0	5	0	6	5	5	13	0.208333	2	1	0	3	1	18291	1056	19347	0	1	0.208333	virus-like	NA	0	7	1	0	0	Medium-quality	86.81	AAI-based (medium-confidence)	NA
Capsule1_17200419	8922	3732	9	5	5	29944	27944	42.51	0	11	40	0	0	0	0	0	0	0	0	1	2	1	3	3	4	33	0.1	2	3	0	5	1	18279	11665	29944	0	1	0.1	virus-like	NA	0	3	2	1	0	Medium-quality	68.12	AAI-based (high-confidence)	NA
Capsule1_23201509	217175	4947	12	2	2	22820	22020	39.87	0	11	30	0	0	0	0	0	0	0	0	0	10	1	4	10	11	15	0.366667	1	1	0	2	1	18275	4545	22820	0	1	0.366667	virus-like	NA	0	5	1	2	0	Medium-quality	69.74	AAI-based (medium-confidence)	NA
Capsule1_06102317	115371	3933	10	5	5	20506	18506	43.28	0	11	28	0	0	0	0	0	0	0	0	0	7	1	9	7	8	11	0.285714	4	1	0	5	1	18269	2237	20506	0	1	0.285714	virus-like	NA	1	8	0	1	0	Low-quality	49.42	AAI-based (high-confidence)	NA
Capsule1_08081803	359542	5304	9	3	3	25995	24795	49.88	0	11	34	0	0	0	0	0	0	0	0	0	5	1	4	5	6	24	0.176471	2	1	0	3	1	18264	7731	25995	0	1	0.176471	virus-like	NA	0	5	2	1	0	Medium-quality	80.76	AAI-based (high-confidence)	NA
Capsule1_20140012	145249	4910	14	7	7	29282	26482	35.59	0	11	40	0	0	0	0	0	0	0	0	1	4	1	2	5	6	32	0.15	1	5	1	6	0.857143	18264	8225	26489	2793	0.904617	0.165816	virus-like	NA	0	1	1	0	1	Medium-quality	57.13	AAI-based (high-confidence)	NA
Capsule1_06021221	234033	3965	10	2	2	18185	17385	50.3	0	11	27	0	0	0	0	0	0	0	0	0	11	0	5	11	11	11	0.407407	2	0	0	2	1	18185	0	18185	0	1	0.407407	virus-like	NA	1	4	1	2	1	Low-quality	23.09	HMM-based (lower-bound)	NA
Capsule1_08182122	156224	4904	19	7	7	22211	19411	36.58	0	11	33	0	0	0	0	0	0	0	0	0	3	1	3	3	4	26	0.121212	5	1	1	6	0.857143	18168	2532	20700	1511	0.931971	0.13006	virus-like	NA	0	2	2	0	0	Medium-quality	59.24	AAI-based (medium-confidence)	NA
Capsule1_09071005	115478	4002	10	3	3	19143	17943	32.32	0	11	37	0	0	0	0	0	0	0	0	0	5	0	4	5	5	28	0.135135	2	1	0	3	1	18128	1015	19143	0	1	0.135135	virus-like	NA	0	3	2	0	3	Medium-quality	59.93	AAI-based (high-confidence)	NA
Capsule1_03150018	228389	4891	17	4	4	22880	21280	49.54	0	11	32	0	0	0	0	0	0	0	0	0	7	0	3	7	7	22	0.21875	3	1	0	4	1	18109	4771	22880	0	1	0.21875	virus-like	NA	0	3	0	1	0	Low-quality	39.64	AAI-based (medium-confidence)	NA
Capsule1_05052203	244820	3753	5	2	2	18028	17228	42.72	0	11	28	0	0	0	0	0	0	0	0	0	4	2	7	4	6	15	0.214286	2	0	0	2	1	18028	0	18028	0	1	0.214286	virus-like	NA	0	8	1	1	0	Low-quality	49.41	AAI-based (high-confidence)	NA
Capsule1_11201607	308332	6229	6	3	3	33187	31987	46.61	0	11	42	0	0	0	0	0	0	0	0	0	8	1	7	8	9	26	0.214286	2	1	0	3	1	18015	15172	33187	0	1	0.214286	virus-like	NA	0	3	2	0	0	High-quality	92.11	AAI-based (medium-confidence)	NA
Capsule1_11220508	52276	3204	13	6	6	21317	18917	33.38	0	11	37	0	0	0	0	0	0	0	0	0	11	0	6	11	11	20	0.297297	4	2	0	6	1	17994	3323	21317	0	1	0.297297	virus-like	NA	0	9	0	0	0	Medium-quality	52.41	AAI-based (high-confidence)	NA
Capsule1_10231600	199164	5239	6	3	3	30204	29004	36.06	0	11	24	0	0	0	0	0	0	0	0	2	1	0	5	3	3	16	0.125	2	1	0	3	1	17945	12259	30204	0	1	0.125	virus-like	NA	0	2	0	0	0	Medium-quality	54.72	AAI-based (high-confidence)	NA
Capsule1_11051510	184731	4042	20	6	6	19206	16806	41.9	0	11	25	0	0	0	0	0	0	0	0	0	9	0	3	9	9	13	0.36	5	0	1	5	0.833333	17943	0	17943	1263	0.934239	0.38534	virus-like	NA	0	5	1	0	1	Low-quality	49.47	AAI-based (high-confidence)	NA
Capsule1_20201318	200437	5673	18	8	8	29511	26311	56.65	0	6	39	0	0	0	0	0	0	0	0	0	6	1	3	6	7	29	0.179487	5	3	0	8	1	17935	11576	29511	0	1	0.179487	virus-like	NA	0	5	0	0	1	Medium-quality	65.94	AAI-based (high-confidence)	NA
Capsule1_01130908	73395	4582	13	6	6	25397	22997	31.08	0	11	38	0	0	0	0	0	0	0	0	0	7	0	7	7	7	24	0.184211	4	2	0	6	1	17930	7467	25397	0	1	0.184211	virus-like	NA	0	7	1	0	0	Medium-quality	53.64	AAI-based (high-confidence)	NA
Capsule1_12171807	275074	4042	11	4	4	17879	16279	33.13	0	11	27	0	0	0	0	0	0	0	0	0	6	0	3	6	6	18	0.222222	4	0	0	4	1	17879	0	17879	0	1	0.222222	virus-like	NA	0	2	0	2	0	Medium-quality	55.91	AAI-based (high-confidence)	NA
Capsule1_20051612	199422	3518	9	5	5	17861	15861	36.73	0	11	26	0	0	0	0	0	0	0	0	0	9	1	2	9	10	14	0.384615	5	0	0	5	1	17861	0	17861	0	1	0.384615	virus-like	NA	0	2	2	0	0	Medium-quality	54.47	AAI-based (high-confidence)	NA
Capsule1_03071721	368220	5739	12	5	5	30043	28043	46.31	0	11	47	0	0	0	0	0	0	0	0	0	7	2	4	7	9	34	0.191489	3	2	0	5	1	17852	12191	30043	0	1	0.191489	virus-like	NA	0	3	1	0	1	Medium-quality	85.38	AAI-based (high-confidence)	NA
Capsule1_03131012	166426	6654	29	12	12	43988	39188	35.95	0	11	68	0	0	0	0	0	0	0	0	2	8	2	3	10	12	53	0.176471	4	6	2	10	0.833333	17813	23488	41301	2687	0.938915	0.187952	virus-like	NA	1	3	0	0	1	Low-quality	32.88	HMM-based (lower-bound)	NA
Capsule1_12021221	207778	4564	11	5	5	21802	19802	40.82	0	11	21	0	0	0	0	0	0	0	0	0	1	0	13	1	1	7	0.047619	4	1	0	5	1	17804	3998	21802	0	1	0.047619	virus-like	NA	0	7	1	0	0	Medium-quality	51.27	AAI-based (high-confidence)	NA
Capsule1_02220012	89845	4904	6	3	3	23924	22724	48.77	0	11	35	0	0	0	0	0	0	0	0	0	4	0	3	4	4	28	0.114286	1	2	0	3	1	17798	6126	23924	0	1	0.114286	virus-like	NA	0	0	1	0	1	Medium-quality	58.99	AAI-based (high-confidence)	NA
Capsule1_23080706	265880	6650	14	6	6	32996	30596	50.43	0	11	35	0	0	0	0	0	0	0	0	0	5	2	6	5	7	22	0.2	4	2	0	6	1	17754	15242	32996	0	1	0.2	virus-like	NA	2	4	4	1	0	Medium-quality	61.02	HMM-based (lower-bound)	NA
Capsule1_12212318	210964	3711	4	1	1	17752	17352	39.98	0	11	21	0	0	0	0	0	0	0	0	0	6	1	4	6	7	10	0.333333	1	0	0	1	1	17752	0	17752	0	1	0.333333	virus-like	NA	0	4	0	1	0	Medium-quality	54.39	AAI-based (medium-confidence)	NA
Capsule1_19172311	158851	5043	11	7	7	30849	28049	51.51	0	11	49	0	0	0	0	0	0	0	0	1	8	0	5	9	9	35	0.183673	3	3	1	6	0.857143	17738	10246	27984	1370	0.907128	0.202478	virus-like	NA	2	2	1	1	1	Medium-quality	80.12	AAI-based (high-confidence)	NA
Capsule1_18131821	110812	3509	6	1	1	17720	17320	35.52	0	11	22	0	0	0	0	0	0	0	0	0	1	0	2	1	1	19	0.0454545	1	0	0	1	1	17720	0	17720	0	1	0.0454545	virus-like	NA	0	1	0	0	0	Low-quality	49.15	AAI-based (high-confidence)	NA
Capsule1_16102300	22741	3509	16	4	4	17709	16109	34.63	0	11	30	0	0	0	0	0	0	0	0	1	5	0	4	6	6	20	0.2	4	0	0	4	1	17709	0	17709	0	1	0.2	virus-like	NA	0	4	0	2	0	Medium-quality	56.39	AAI-based (high-confidence)	NA
Capsule1_15021913	165727	3862	11	5	5	30501	28501	40.66	0	11	38	0	0	0	0	0	0	0	0	0	12	0	9	12	12	17	0.315789	3	2	0	5	1	17685	12816	30501	0	1	0.315789	virus-like	NA	0	4	4	0	0	Medium-quality	62.86	AAI-based (medium-confidence)	NA
Capsule1_09110018	6298	2624	12	2	2	17676	16876	35.68	0	11	17	0	0	0	0	0	0	0	0	0	3	2	3	3	5	9	0.294118	2	0	0	2	1	17676	0	17676	0	1	0.294118	virus-like	NA	0	7	0	0	1	Low-quality	27.35	AAI-based (medium-confidence)	NA
Capsule1_00110018	5131	2286	10	1	1	17627	17227	35.66	0	11	16	0	0	0	0	0	0	0	0	0	2	2	3	2	4	9	0.25	1	0	0	1	1	17627	0	17627	0	1	0.25	virus-like	NA	0	6	0	0	1	Low-quality	28.79	AAI-based (medium-confidence)	NA
Capsule1_16020109	57889	5496	12	6	6	28617	26217	65.72	0	11	37	0	0	0	0	0	0	0	0	1	9	1	1	10	11	25	0.297297	2	1	3	3	0.5	17620	1833	19453	9164	0.679771	0.437349	virus-like	NA	0	1	1	1	1	Low-quality	42.67	AAI-based (medium-confidence)	NA
Capsule1_15170306	120287	3602	5	2	2	17585	16785	31.97	0	11	24	0	0	0	0	0	0	0	0	0	6	0	5	6	6	13	0.25	2	0	0	2	1	17585	0	17585	0	1	0.25	virus-like	NA	0	8	0	0	0	Medium-quality	54.47	AAI-based (high-confidence)	NA
Capsule1_04051615	145706	4588	14	4	4	20652	19052	36.47	0	11	17	0	0	0	0	0	0	0	0	0	8	2	2	8	10	5	0.588235	2	1	1	3	0.75	17505	1274	18779	1873	0.909307	0.646905	virus-like	NA	1	7	0	1	0	Medium-quality	56.87	AAI-based (high-confidence)	NA
Capsule1_08111815	228009	2866	6	3	3	17502	16302	41.38	0	11	20	0	0	0	0	0	0	0	0	0	3	0	6	3	3	11	0.15	3	0	0	3	1	17502	0	17502	0	1	0.15	virus-like	NA	0	7	0	0	0	High-quality	100	AAI-based (high-confidence)	NA
Capsule1_06170712	6877	3280	76	14	14	24299	18699	44.23	0	11	34	0	0	0	0	0	0	0	0	1	9	1	9	10	11	14	0.323529	10	4	0	14	1	17489	5898	23387	0	0.962468	0.336146	virus-like	NA	0	10	0	0	0	Medium-quality	52.48	AAI-based (high-confidence)	NA
Capsule1_13200905	268665	4863	31	8	8	23591	20391	37.04	0	11	28	0	0	0	0	0	0	0	0	0	4	2	5	4	6	17	0.214286	5	3	0	8	1	17486	6105	23591	0	1	0.214286	virus-like	NA	0	2	3	0	0	Low-quality	37.27	AAI-based (high-confidence)	NA
Capsule1_16082222	15211	2575	6	5	5	17471	15471	32.99	0	11	31	0	0	0	0	0	0	0	0	0	14	0	3	14	14	14	0.451613	5	0	0	5	1	17471	0	17471	0	1	0.451613	virus-like	NA	0	7	1	1	0	Low-quality	47.48	AAI-based (high-confidence)	NA
Capsule1_00180918	347900	4691	7	2	2	24548	23748	36.99	0	11	36	0	0	0	0	0	0	0	0	0	8	0	2	8	8	26	0.222222	1	1	0	2	1	17448	7100	24548	0	1	0.222222	virus-like	NA	0	1	2	0	1	Medium-quality	60.62	AAI-based (medium-confidence)	NA
Capsule1_16051821	117070	4593	19	5	5	19735	17735	38.59	0	11	20	0	0	0	0	0	0	0	0	0	4	2	3	4	6	11	0.3	4	1	0	5	1	17439	2296	19735	0	1	0.3	virus-like	NA	0	8	0	0	0	Medium-quality	69.35	AAI-based (medium-confidence)	NA
Capsule1_09230709	171298	3602	7	4	4	17432	15832	35.16	0	11	32	0	0	0	0	0	0	0	0	0	11	0	3	11	11	18	0.34375	4	0	0	4	1	17432	0	17432	0	1	0.34375	virus-like	NA	0	4	0	0	0	Medium-quality	55.61	AAI-based (high-confidence)	NA
Capsule1_00170708	4606	2141	24	8	8	19508	16308	31.44	0	11	36	0	0	0	0	0	0	0	0	0	6	0	4	6	6	26	0.166667	6	2	0	8	1	17423	2085	19508	0	1	0.166667	virus-like	NA	0	7	0	0	0	Medium-quality	62.17	AAI-based (high-confidence)	NA
Capsule1_14171005	231126	4692	13	5	5	31205	29205	49.84	0	11	39	0	0	0	0	0	0	0	0	0	10	0	9	10	10	20	0.25641	3	2	0	5	1	17419	13786	31205	0	1	0.25641	virus-like	NA	0	7	2	2	0	High-quality	94.34	AAI-based (high-confidence)	NA
Capsule1_04230818	246548	3794	10	4	4	17396	15796	43.22	0	11	21	0	0	0	0	0	0	0	0	0	5	0	9	5	5	7	0.238095	4	0	0	4	1	17396	0	17396	0	1	0.238095	virus-like	NA	0	11	0	0	0	Low-quality	42.63	AAI-based (high-confidence)	NA
Capsule1_17050615	58823	2993	8	5	5	25177	23177	49.24	0	11	31	0	0	0	0	0	0	0	0	0	10	1	7	10	11	13	0.354839	2	3	0	5	1	17388	7789	25177	0	1	0.354839	virus-like	NA	0	4	2	0	0	Low-quality	42.09	AAI-based (high-confidence)	NA
Capsule1_11170612	97351	5181	17	8	8	28531	25331	46.43	0	11	50	0	0	0	0	0	0	0	0	1	16	1	3	17	18	29	0.36	4	2	2	6	0.75	17371	8978	26349	2182	0.923522	0.389812	virus-like	NA	0	4	1	0	0	Low-quality	45.82	AAI-based (medium-confidence)	NA
Capsule1_17020209	301023	4342	20	6	6	19663	17263	38.26	0	11	34	0	0	0	0	0	0	0	0	0	9	0	6	9	9	19	0.264706	4	2	0	6	1	17353	2310	19663	0	1	0.264706	virus-like	NA	0	6	0	0	1	Medium-quality	50.48	AAI-based (high-confidence)	NA
Capsule1_01111512	47988	3652	9	2	2	17318	16518	40.19	0	11	23	0	0	0	0	0	0	0	0	0	8	0	4	8	8	11	0.347826	2	0	0	2	1	17318	0	17318	0	1	0.347826	virus-like	NA	0	8	0	0	0	Medium-quality	52.14	AAI-based (high-confidence)	NA
Capsule1_10140019	70161	3816	20	9	9	23950	20350	40.77	0	11	28	0	0	0	0	0	0	0	0	0	8	1	7	8	9	12	0.321429	5	4	0	9	1	17269	6681	23950	0	1	0.321429	virus-like	NA	0	7	0	0	0	Low-quality	36.42	AAI-based (medium-confidence)	NA
Capsule1_04230617	83806	5332	20	6	6	28459	26059	36.07	0	11	27	0	0	0	0	0	0	0	0	0	3	0	5	3	3	19	0.111111	3	3	0	6	1	17251	11208	28459	0	1	0.111111	virus-like	NA	0	2	0	1	0	Low-quality	47.02	AAI-based (high-confidence)	NA
Capsule1_20020218	93740	2267	9	2	2	17152	16352	33.12	0	11	20	0	0	0	0	0	0	0	0	0	0	0	15	0	0	5	0	2	0	0	2	1	17152	0	17152	0	1	0	virus-like	NA	0	13	1	0	0	Low-quality	9.65	AAI-based (medium-confidence)	high kmer_freq may indicate large duplication
Capsule1_18152012	34350	2959	13	4	4	17140	15540	35.46	0	11	19	0	0	0	0	0	0	0	0	0	0	0	13	0	0	6	0	4	0	0	4	1	17140	0	17140	0	1	0	virus-like	NA	0	12	0	0	0	Low-quality	9.63	AAI-based (medium-confidence)	NA
Capsule1_18161214	31619	2863	16	5	5	18197	16197	39.92	0	11	27	0	0	0	0	0	0	0	0	2	4	0	9	6	6	12	0.222222	4	1	0	5	1	17132	1065	18197	0	1	0.222222	virus-like	NA	1	6	4	0	0	Low-quality	10.29	AAI-based (high-confidence)	NA
Capsule1_14110311	227755	3341	13	4	4	17058	15458	51.06	0	11	20	0	0	0	0	0	0	0	0	0	6	2	3	6	8	9	0.4	4	0	0	4	1	17058	0	17058	0	1	0.4	virus-like	NA	0	10	1	0	0	Low-quality	48.96	AAI-based (medium-confidence)	NA
Capsule1_03120321	240361	3925	13	4	4	19524	17924	46.03	0	11	22	0	0	0	0	0	0	0	0	0	6	0	7	6	6	9	0.272727	2	2	0	4	1	17052	2472	19524	0	1	0.272727	virus-like	NA	0	8	0	0	0	Low-quality	49.01	AAI-based (high-confidence)	NA
Capsule1_11072318	268084	5357	11	3	3	26388	25188	35.29	0	11	30	0	0	0	0	0	0	0	0	0	8	0	3	8	8	19	0.266667	2	1	0	3	1	17036	9352	26388	0	1	0.266667	virus-like	NA	0	2	1	0	0	Medium-quality	76.63	AAI-based (high-confidence)	NA
Capsule1_02202121	10717	4388	31	7	7	28700	25900	47.79	0	11	34	0	0	0	0	0	0	0	0	1	2	0	3	3	3	28	0.0882353	3	3	1	6	0.857143	16969	10490	27459	1241	0.95676	0.0922231	virus-like	NA	0	4	0	0	1	Medium-quality	50.72	AAI-based (medium-confidence)	NA
Capsule1_12231513	225914	5304	22	10	10	26483	22483	42.09	0	11	41	0	0	0	0	0	0	0	0	1	2	1	13	3	4	24	0.097561	5	5	0	10	1	16935	9548	26483	0	1	0.097561	virus-like	NA	0	2	1	0	0	Medium-quality	57.66	AAI-based (medium-confidence)	NA
Capsule1_18181721	196809	3898	8	3	3	16933	15733	40.21	0	11	21	0	0	0	0	0	0	0	0	0	7	0	3	7	7	11	0.333333	3	0	0	3	1	16933	0	16933	0	1	0.333333	virus-like	NA	2	3	0	0	0	Medium-quality	52.35	AAI-based (medium-confidence)	NA
Capsule1_05162319	138176	3551	10	5	5	19113	17113	40.31	0	11	25	0	0	0	0	0	0	0	0	0	5	3	3	5	8	14	0.32	3	2	0	5	1	16904	2209	19113	0	1	0.32	virus-like	NA	0	3	0	1	0	Low-quality	41.75	AAI-based (medium-confidence)	NA
Capsule1_17040315	86367	3666	16	7	7	19417	16617	33.56	0	11	29	0	0	0	0	0	0	0	0	1	5	0	7	6	6	16	0.206897	5	1	1	6	0.857143	16878	1363	18241	1176	0.939435	0.220235	virus-like	NA	0	1	2	0	0	Low-quality	29.54	AAI-based (medium-confidence)	NA
Capsule1_14082316	47564	3518	9	4	4	19044	17444	39.8	0	11	17	0	0	0	0	0	0	0	0	0	2	0	7	2	2	8	0.117647	2	2	0	4	1	16873	2171	19044	0	1	0.117647	virus-like	NA	0	3	0	0	0	Low-quality	35.32	AAI-based (medium-confidence)	NA
Capsule1_16111408	24143	3268	4	1	1	16855	16455	33.25	0	11	27	0	0	0	0	0	0	0	0	0	5	0	4	5	5	18	0.185185	1	0	0	1	1	16855	0	16855	0	1	0.185185	virus-like	NA	0	4	0	1	1	Medium-quality	52.57	AAI-based (medium-confidence)	NA
Capsule1_18081210	222507	3557	9	4	4	17910	16310	51.32	0	11	20	0	0	0	0	0	0	0	0	0	5	0	3	5	5	12	0.25	3	0	1	3	0.75	16833	0	16833	1077	0.939866	0.265995	virus-like	NA	0	3	0	0	0	Low-quality	47.58	AAI-based (high-confidence)	NA
Capsule1_18231223	75814	3301	24	6	6	19120	16720	36.14	0	11	35	0	0	0	0	0	0	0	0	0	5	1	2	5	6	27	0.171429	4	0	2	4	0.666667	16812	0	16812	2308	0.879289	0.194963	virus-like	NA	0	7	0	0	0	Low-quality	26.92	AAI-based (high-confidence)	NA
Capsule1_10081621	317251	3268	9	3	3	16806	15606	48.31	0	11	22	0	0	0	0	0	0	0	0	0	6	0	8	6	6	8	0.272727	3	0	0	3	1	16806	0	16806	0	1	0.272727	virus-like	NA	0	10	0	0	0	Medium-quality	73.12	AAI-based (high-confidence)	NA
Capsule1_13191918	5339	2555	22	6	6	23051	20651	37.18	0	11	22	0	0	0	0	0	0	0	0	1	6	0	4	7	7	11	0.318182	4	2	0	6	1	16778	6273	23051	0	1	0.318182	virus-like	NA	0	4	0	0	0	Low-quality	39.8	AAI-based (high-confidence)	NA
Capsule1_01141421	94361	4627	16	4	4	22119	20519	53.36	0	11	36	0	0	0	0	0	0	0	0	0	9	1	1	9	10	25	0.277778	3	1	0	4	1	16766	5353	22119	0	1	0.277778	virus-like	NA	1	5	0	1	0	Medium-quality	64.38	AAI-based (high-confidence)	NA
Capsule1_18081717	10676	3222	17	4	4	23825	22225	34.57	0	11	13	0	0	0	0	0	0	0	0	0	2	0	2	2	2	9	0.153846	2	2	0	4	1	16754	7071	23825	0	1	0.153846	virus-like	NA	0	5	0	0	0	Low-quality	37.12	AAI-based (medium-confidence)	NA
Capsule1_11070915	231811	2295	24	5	5	17750	15750	39.19	0	11	34	0	0	0	0	0	0	0	0	0	10	2	5	10	12	17	0.352941	4	1	0	5	1	16745	1005	17750	0	1	0.352941	virus-like	NA	0	0	0	0	0	Low-quality	42.66	AAI-based (high-confidence)	NA
Capsule1_06040618	149849	2770	12	5	5	20296	18296	35.77	0	11	15	0	0	0	0	0	0	0	0	0	3	0	0	3	3	12	0.2	3	2	0	5	1	16744	3552	20296	0	1	0.2	virus-like	NA	0	2	0	0	0	Low-quality	20.28	AAI-based (high-confidence)	NA
Capsule1_14230707	547998	8546	23	7	7	43847	41047	44.41	0	11	47	0	0	0	0	0	0	0	0	0	11	0	6	11	11	30	0.234043	3	3	1	6	0.857143	16742	26038	42780	1067	0.975665	0.23988	virus-like	NA	0	3	1	2	0	Medium-quality	68.71	AAI-based (high-confidence)	NA
Capsule1_17031107	149204	4551	19	7	7	22303	19503	46.81	0	11	27	0	0	0	0	0	0	0	0	2	3	0	4	5	5	18	0.185185	4	3	0	7	1	16684	5146	21830	0	0.978792	0.189198	virus-like	NA	0	1	1	0	2	Medium-quality	55.98	AAI-based (medium-confidence)	NA
Capsule1_09181111	200090	4138	20	6	6	17915	15515	53.06	0	11	32	0	0	0	0	0	0	0	0	0	11	2	3	11	13	16	0.40625	5	1	0	6	1	16646	1269	17915	0	1	0.40625	virus-like	NA	0	3	1	0	1	Low-quality	48.76	AAI-based (high-confidence)	NA
Capsule1_03172121	253715	3514	15	6	6	18841	16441	43.22	0	11	32	0	0	0	0	0	0	0	0	0	2	1	7	2	3	22	0.09375	5	1	0	6	1	16628	2213	18841	0	1	0.09375	virus-like	NA	0	6	1	0	0	Low-quality	34.48	AAI-based (high-confidence)	NA
Capsule1_00091114	104145	4618	15	6	6	25998	23598	33.91	0	11	47	0	0	0	0	0	0	0	0	0	2	0	2	2	2	43	0.0425532	4	2	0	6	1	16614	9384	25998	0	1	0.0425532	virus-like	NA	0	1	0	0	0	Medium-quality	61.47	AAI-based (medium-confidence)	NA
Capsule1_16160811	86320	3773	11	3	3	16608	15408	37.58	0	11	23	0	0	0	0	0	0	0	0	0	5	0	2	5	5	16	0.217391	3	0	0	3	1	16608	0	16608	0	1	0.217391	virus-like	NA	0	3	0	0	0	Low-quality	45.77	AAI-based (high-confidence)	NA
Capsule1_14111915	106251	3631	14	7	7	19749	16949	41.94	0	11	32	0	0	0	0	0	0	0	0	0	4	1	9	4	5	18	0.15625	5	2	0	7	1	16602	3147	19749	0	1	0.15625	virus-like	NA	0	12	2	0	0	Low-quality	29.19	HMM-based (lower-bound)	NA
Capsule1_22081112	83697	7000	8	7	7	46702	43902	59.3	0	11	73	0	0	0	0	0	0	0	0	1	7	0	4	8	8	61	0.109589	3	2	2	5	0.714286	16581	15360	31941	14761	0.683932	0.160234	virus-like	NA	0	4	1	1	0	Low-quality	34.15	HMM-based (lower-bound)	NA
Capsule1_02101403	254112	4901	17	9	9	26979	23379	40.19	0	11	29	0	0	0	0	0	0	0	0	0	2	2	12	2	4	13	0.137931	5	3	1	8	0.888889	16527	9393	25920	1059	0.960747	0.143566	virus-like	NA	0	7	0	0	0	Medium-quality	53.14	AAI-based (high-confidence)	NA
Capsule1_23081206	69010	3286	17	8	8	17632	14432	33.4	0	11	37	0	0	0	0	0	0	0	0	0	7	0	6	7	7	24	0.189189	7	1	0	8	1	16495	1137	17632	0	1	0.189189	virus-like	NA	0	7	0	1	0	Medium-quality	54.64	AAI-based (high-confidence)	NA
Capsule1_01110018	8575	3073	21	2	2	17716	16916	35.53	0	11	17	0	0	0	0	0	0	0	0	0	2	3	3	2	5	9	0.294118	1	1	0	2	1	16484	1232	17716	0	1	0.294118	virus-like	NA	0	7	0	0	1	Low-quality	28.38	AAI-based (medium-confidence)	NA
Capsule1_14092003	3991	1902	32	6	6	16473	14073	40.45	0	11	26	0	0	0	0	0	0	0	0	0	7	0	6	7	7	13	0.269231	6	0	0	6	1	16473	0	16473	0	1	0.269231	virus-like	NA	0	7	0	0	0	Low-quality	28.71	AAI-based (medium-confidence)	NA
Capsule1_21112110	168576	3711	11	2	2	16465	15665	29.15	0	11	24	0	0	0	0	0	0	0	0	0	8	2	1	8	10	13	0.416667	2	0	0	2	1	16465	0	16465	0	1	0.416667	virus-like	NA	0	3	0	1	0	Medium-quality	52.13	AAI-based (high-confidence)	NA
Capsule1_14231709	184793	6162	20	8	8	36386	33186	37.35	0	11	51	0	0	0	0	0	0	0	0	1	14	0	9	15	15	27	0.294118	3	5	0	8	1	16461	19925	36386	0	1	0.294118	virus-like	NA	1	6	2	1	1	Medium-quality	63.81	AAI-based (high-confidence)	NA
Capsule1_02022015	108935	4423	14	7	7	33475	30675	30.49	0	11	50	0	0	0	0	0	0	0	0	3	7	0	0	10	10	40	0.2	4	3	0	7	1	16449	17026	33475	0	1	0.2	virus-like	NA	0	1	0	1	0	Low-quality	46.4	AAI-based (medium-confidence)	NA
Capsule1_02091022	77877	3559	12	3	3	17750	16550	58.18	0	11	34	0	0	0	0	0	0	0	0	0	11	0	5	11	11	18	0.323529	2	0	1	2	0.666667	16445	0	16445	1305	0.926479	0.349203	virus-like	NA	1	2	0	0	0	Low-quality	46.88	AAI-based (medium-confidence)	NA
Capsule1_11201121	422198	7050	26	8	8	35527	32327	48.33	0	11	47	0	0	0	0	0	0	0	0	0	4	1	3	4	5	39	0.106383	3	5	0	8	1	16433	19094	35527	0	1	0.106383	virus-like	NA	0	0	1	1	0	Medium-quality	63.69	AAI-based (high-confidence)	low-confidence DTR
Capsule1_11050005	141212	3513	13	4	4	16317	14717	47.73	0	11	20	0	0	0	0	0	0	0	0	1	6	0	4	7	7	9	0.35	4	0	0	4	1	16317	0	16317	0	1	0.35	virus-like	NA	0	6	0	1	1	Medium-quality	50.08	AAI-based (high-confidence)	NA
Capsule1_06140819	121678	3463	10	5	5	17449	15449	32.71	0	11	31	0	0	0	0	0	0	0	0	0	3	0	3	3	3	25	0.0967742	4	1	0	5	1	16302	1147	17449	0	1	0.0967742	virus-like	NA	2	4	0	0	0	Medium-quality	53.26	AAI-based (high-confidence)	NA
Capsule1_03142105	242279	8226	42	14	14	55347	49747	49.46	0	11	79	0	0	0	0	0	0	0	0	0	2	8	15	2	10	54	0.126582	3	11	0	14	1	16282	37373	53655	0	0.969429	0.130574	virus-like	NA	0	0	2	0	0	Low-quality	28.91	AAI-based (medium-confidence)	NA
Capsule1_08232023	345713	3762	19	5	5	17382	15382	42.78	0	11	27	0	0	0	0	0	0	0	0	0	10	1	3	10	11	13	0.407407	4	0	1	4	0.8	16235	0	16235	1147	0.934012	0.436191	virus-like	NA	0	5	2	0	0	Low-quality	44.68	AAI-based (high-confidence)	NA
Capsule1_01081823	278544	3029	7	2	2	16215	15415	36.68	0	11	22	0	0	0	0	0	0	0	0	0	3	0	3	3	3	16	0.136364	2	0	0	2	1	16215	0	16215	0	1	0.136364	virus-like	NA	0	3	0	0	1	Low-quality	26.74	AAI-based (high-confidence)	NA
Capsule1_07061216	116557	3473	9	5	5	19202	17202	42.16	0	11	19	0	0	0	0	0	0	0	0	0	4	0	2	4	4	13	0.210526	3	1	1	4	0.8	16203	1688	17891	1311	0.931726	0.225953	virus-like	NA	1	2	0	0	0	Medium-quality	50.95	AAI-based (medium-confidence)	NA
Capsule1_06131009	266347	3771	14	4	4	16193	14593	38.32	0	11	28	0	0	0	0	0	0	0	0	0	3	1	4	3	4	20	0.142857	4	0	0	4	1	16193	0	16193	0	1	0.142857	virus-like	NA	0	3	0	0	1	Low-quality	35.98	AAI-based (medium-confidence)	NA
Capsule1_07080500	31798	3265	12	5	5	16145	14145	32.08	0	11	21	0	0	0	0	0	0	0	0	0	5	1	1	5	6	14	0.285714	5	0	0	5	1	16145	0	16145	0	1	0.285714	virus-like	NA	0	2	0	0	1	Low-quality	44.58	AAI-based (high-confidence)	NA
Capsule1_06130506	117483	2672	3	2	2	16139	15339	33.76	0	11	34	0	0	0	0	0	0	0	0	0	9	0	6	9	9	19	0.264706	2	0	0	2	1	16139	0	16139	0	1	0.264706	virus-like	NA	0	1	1	1	0	Low-quality	48.41	AAI-based (medium-confidence)	NA
Capsule1_02170708	4263	2019	46	8	8	17458	14258	31.35	0	11	33	0	0	0	0	0	0	0	0	0	7	0	4	7	7	22	0.212121	7	1	0	8	1	16106	1352	17458	0	1	0.212121	virus-like	NA	0	8	1	0	0	Medium-quality	55.94	AAI-based (high-confidence)	NA
Capsule1_12031915	180966	3781	6	2	2	18560	17760	43.88	0	11	23	0	0	0	0	0	0	0	0	0	0	2	1	0	2	20	0.0869565	1	0	1	1	0.5	16103	0	16103	2457	0.867619	0.100224	virus-like	NA	0	0	0	0	0	Not-determined	0	NA	no viral genes detected
Capsule1_02061515	77795	3799	18	6	6	18670	16270	37.92	0	11	37	0	0	0	0	0	0	0	0	0	8	0	8	8	8	21	0.216216	4	1	1	5	0.833333	16081	1319	17400	1270	0.931976	0.231998	virus-like	NA	0	3	0	0	0	Low-quality	32.66	AAI-based (medium-confidence)	NA
Capsule1_01191918	10244	4169	29	6	6	30510	28110	36.83	0	11	36	0	0	0	0	0	0	0	0	2	7	0	6	9	9	21	0.25	4	2	0	6	1	16061	14449	30510	0	1	0.25	virus-like	NA	0	3	1	2	0	Medium-quality	52.48	AAI-based (high-confidence)	NA
Capsule1_08230303	236279	3558	5	2	2	16061	15261	37.02	0	11	17	0	0	0	0	0	0	0	0	1	2	3	1	3	6	10	0.352941	2	0	0	2	1	16061	0	16061	0	1	0.352941	virus-like	NA	0	0	0	0	0	Medium-quality	78.29	AAI-based (medium-confidence)	NA
Capsule1_12050316	105491	8666	24	9	9	49005	45405	46.39	0	11	80	0	0	0	0	0	0	0	0	4	8	2	8	12	14	58	0.175	3	5	1	8	0.888889	16043	29163	45206	1079	0.922477	0.189707	virus-like	NA	0	3	2	2	2	Medium-quality	61.37	AAI-based (high-confidence)	NA
Capsule1_00081520	49262	2806	7	4	4	16037	14437	49.76	0	11	29	0	0	0	0	0	0	0	0	0	3	1	5	3	4	20	0.137931	4	0	0	4	1	16037	0	16037	0	1	0.137931	virus-like	NA	0	4	0	1	0	Low-quality	35.39	AAI-based (medium-confidence)	NA
Capsule1_03021812	217776	3885	8	2	2	18738	17938	39.86	0	11	27	0	0	0	0	0	0	0	0	0	2	0	1	2	2	24	0.0740741	1	1	0	2	1	16001	2737	18738	0	1	0.0740741	virus-like	NA	0	2	0	0	0	Medium-quality	66.39	AAI-based (medium-confidence)	NA
Capsule1_00230003	10566	4542	152	16	16	28218	21818	39.46	0	11	35	0	0	0	0	0	0	0	0	0	2	0	15	2	2	18	0.0571429	8	8	0	16	1	15996	12222	28218	0	1	0.0571429	virus-like	NA	0	8	1	0	0	Low-quality	16.02	AAI-based (medium-confidence)	NA
Capsule1_17011600	160440	3616	11	2	2	15994	15194	37.68	0	11	27	0	0	0	0	0	0	0	0	0	14	0	2	14	14	11	0.518519	2	0	0	2	1	15994	0	15994	0	1	0.518519	virus-like	NA	0	4	0	1	0	Low-quality	48.46	AAI-based (high-confidence)	NA
Capsule1_09171717	293908	2999	12	5	5	15992	13992	39.02	0	11	17	0	0	0	0	0	0	0	0	0	0	0	9	0	0	8	0	5	0	0	5	1	15992	0	15992	0	1	0	virus-like	NA	1	4	1	0	0	Low-quality	29.51	AAI-based (high-confidence)	NA
Capsule1_19031121	183730	4956	24	5	5	25720	23720	45	0	11	54	0	0	0	0	0	0	0	0	0	13	0	6	13	13	35	0.240741	3	2	0	5	1	15983	9737	25720	0	1	0.240741	virus-like	NA	1	4	3	2	0	Medium-quality	66.53	AAI-based (medium-confidence)	NA
Capsule1_03091806	160721	5687	10	4	4	28357	26757	50.22	0	11	36	0	0	0	0	0	0	0	0	0	11	0	6	11	11	19	0.305556	3	1	0	4	1	15969	12388	28357	0	1	0.305556	virus-like	NA	1	5	1	2	1	Medium-quality	85.91	AAI-based (high-confidence)	NA
Capsule1_07092003	5101	2172	37	7	7	19034	16234	40.06	0	11	35	0	0	0	0	0	0	0	0	0	8	0	6	8	8	21	0.228571	4	2	1	6	0.857143	15936	2080	18016	1018	0.946517	0.241487	virus-like	NA	0	7	0	0	0	Low-quality	30.14	AAI-based (medium-confidence)	NA
Capsule1_13221118	233447	3767	12	6	6	19295	16895	38.44	0	11	27	0	0	0	0	0	0	0	0	0	1	0	10	1	1	16	0.037037	3	3	0	6	1	15922	3373	19295	0	1	0.037037	virus-like	NA	0	7	2	0	0	Low-quality	11.61	AAI-based (medium-confidence)	NA
Capsule1_22230615	101023	5275	15	7	7	28447	25647	64.57	0	11	50	0	0	0	0	0	0	0	0	0	11	0	1	11	11	38	0.22	4	1	2	5	0.714286	15894	10116	26010	2437	0.914332	0.240613	virus-like	NA	0	2	0	0	0	Low-quality	49.33	AAI-based (medium-confidence)	NA
Capsule1_19230104	151343	3532	12	5	5	17241	15241	43.39	0	11	18	0	0	0	0	0	0	0	0	0	7	0	3	7	7	8	0.388889	4	1	0	5	1	15857	1384	17241	0	1	0.388889	virus-like	NA	0	5	0	0	0	Low-quality	46.57	AAI-based (high-confidence)	NA
Capsule1_09080820	101674	3176	12	4	4	16895	15295	41.49	0	11	22	0	0	0	0	0	0	0	0	0	11	1	4	11	12	6	0.545455	3	1	0	4	1	15849	1046	16895	0	1	0.545455	virus-like	NA	0	4	3	0	1	Low-quality	47.12	AAI-based (high-confidence)	NA
Capsule1_13090822	96845	2847	20	5	5	15824	13824	32.31	0	11	21	0	0	0	0	0	0	0	0	0	7	0	4	7	7	10	0.333333	5	0	0	5	1	15824	0	15824	0	1	0.333333	virus-like	NA	0	6	0	1	0	Low-quality	45.3	AAI-based (high-confidence)	NA
Capsule1_23051306	109305	3091	15	5	5	15801	13801	35.44	0	11	24	0	0	0	0	0	0	0	0	0	7	1	3	7	8	13	0.333333	5	0	0	5	1	15801	0	15801	0	1	0.333333	virus-like	NA	0	4	3	1	0	Low-quality	20.12	HMM-based (lower-bound)	NA
Capsule1_00082220	123744	3215	21	7	7	18316	15516	61.19	0	11	24	0	0	0	0	0	0	0	0	0	2	0	2	2	2	20	0.0833333	5	2	0	7	1	15778	2538	18316	0	1	0.0833333	virus-like	NA	0	5	0	0	0	Low-quality	40.25	AAI-based (medium-confidence)	NA
Capsule1_14221319	133815	3000	4	2	2	15756	14956	48.39	0	11	24	0	0	0	0	0	0	0	0	0	11	0	6	11	11	7	0.458333	2	0	0	2	1	15756	0	15756	0	1	0.458333	virus-like	NA	0	9	0	0	0	Medium-quality	67.71	AAI-based (medium-confidence)	NA
Capsule1_19231915	206160	3659	3	1	1	15742	15342	40.65	0	11	24	0	0	0	0	0	0	0	0	0	12	0	1	12	12	11	0.5	1	0	0	1	1	15742	0	15742	0	1	0.5	virus-like	NA	0	4	0	0	0	Medium-quality	89.05	AAI-based (high-confidence)	NA
Capsule1_09201404	117867	4731	14	5	5	21461	19461	50.79	0	11	44	0	0	0	0	0	0	0	0	1	7	0	8	8	8	28	0.181818	3	1	1	4	0.8	15697	4640	20337	1124	0.947626	0.191867	virus-like	NA	1	8	1	0	0	Low-quality	29.43	HMM-based (lower-bound)	NA
Capsule1_09190909	10201	3585	99	17	17	27551	20751	36.19	0	11	34	0	0	0	0	0	0	0	0	0	5	0	10	5	5	19	0.147059	9	5	3	14	0.823529	15649	8741	24390	3161	0.885267	0.166118	virus-like	NA	0	2	1	1	0	Low-quality	40.86	AAI-based (high-confidence)	NA
Capsule1_03110811	392698	2646	12	4	4	17082	15482	40.64	0	11	25	0	0	0	0	0	0	0	0	0	9	1	0	9	10	15	0.4	4	0	0	4	1	15617	0	15617	0	0.914237	0.437523	virus-like	NA	0	1	0	0	1	Low-quality	43.39	AAI-based (medium-confidence)	NA
Capsule1_17200308	52936	5539	18	7	7	29435	26635	58.57	0	11	63	0	0	0	0	0	0	0	0	1	9	0	1	10	10	52	0.15873	3	2	2	5	0.714286	15594	11205	26799	2636	0.910447	0.174343	virus-like	NA	0	2	0	1	0	Low-quality	21.6	HMM-based (lower-bound)	NA
Capsule1_19100600	178119	3514	19	2	2	15565	14765	42.89	0	11	33	0	0	0	0	0	0	0	0	0	2	1	7	2	3	23	0.0909091	2	0	0	2	1	15565	0	15565	0	1	0.0909091	virus-like	NA	0	4	0	0	0	Low-quality	42.5	AAI-based (high-confidence)	NA
Capsule1_15190909	4965	2080	26	4	4	20126	18526	37.02	0	11	26	0	0	0	0	0	0	0	0	0	5	0	5	5	5	16	0.192308	2	2	0	4	1	15549	4577	20126	0	1	0.192308	virus-like	NA	0	0	0	0	0	Low-quality	33.3	AAI-based (high-confidence)	NA
Capsule1_02041614	122847	4778	13	5	5	22821	20821	55.56	0	11	41	0	0	0	0	0	0	0	0	0	9	0	3	9	9	29	0.219512	4	1	0	5	1	15543	7278	22821	0	1	0.219512	virus-like	NA	0	5	1	0	1	Medium-quality	62.74	AAI-based (high-confidence)	NA
Capsule1_10131803	229102	2967	9	5	5	15529	13529	37.24	0	11	29	0	0	0	0	0	0	0	0	0	5	0	6	5	5	18	0.172414	5	0	0	5	1	15529	0	15529	0	1	0.172414	virus-like	NA	0	6	1	0	0	Low-quality	43.31	AAI-based (high-confidence)	NA
Capsule1_03071609	183209	3303	12	4	4	15412	13812	37.08	0	11	20	0	0	0	0	0	0	0	0	0	2	2	1	2	4	15	0.2	4	0	0	4	1	15412	0	15412	0	1	0.2	virus-like	NA	1	0	1	1	0	Low-quality	4.97	HMM-based (lower-bound)	NA
Capsule1_23141503	301645	2852	10	4	4	17922	16322	40.68	0	11	37	0	0	0	0	0	0	0	0	0	15	0	2	15	15	20	0.405405	2	2	0	4	1	15375	2547	17922	0	1	0.405405	virus-like	NA	0	4	0	0	0	High-quality	100	AAI-based (high-confidence)	NA
Capsule1_01230312	113300	3081	32	8	8	21594	18394	36.13	0	11	22	0	0	0	0	0	0	0	0	1	5	0	3	6	6	13	0.272727	4	3	1	7	0.875	15312	5280	20592	1002	0.953598	0.285998	virus-like	NA	0	2	0	0	0	Low-quality	37.18	AAI-based (high-confidence)	NA
Capsule1_12061406	152125	3313	10	4	4	15310	13710	35.73	0	11	28	0	0	0	0	0	0	0	0	0	10	1	6	10	11	11	0.392857	4	0	0	4	1	15310	0	15310	0	1	0.392857	virus-like	NA	0	3	0	1	2	Low-quality	40.47	AAI-based (high-confidence)	NA
Capsule1_04160616	79106	3758	23	5	5	15289	13289	36.22	0	11	22	0	0	0	0	0	0	0	0	0	9	0	3	9	9	10	0.409091	5	0	0	5	1	15289	0	15289	0	1	0.409091	virus-like	NA	0	2	1	1	1	Low-quality	44.36	AAI-based (high-confidence)	NA
Capsule1_02182303	92747	2476	10	5	5	15287	13287	34.69	0	11	20	0	0	0	0	0	0	0	0	0	9	0	3	9	9	8	0.45	5	0	0	5	1	15287	0	15287	0	1	0.45	virus-like	NA	0	2	0	0	0	Low-quality	43.61	AAI-based (high-confidence)	NA
Capsule1_13230909	426126	4156	10	4	4	19993	18393	33.16	0	11	31	0	0	0	0	0	0	0	0	0	6	0	6	6	6	19	0.193548	2	2	0	4	1	15234	4759	19993	0	1	0.193548	virus-like	NA	0	4	3	0	0	Low-quality	30.21	HMM-based (lower-bound)	NA
Capsule1_00052315	3826	1760	41	9	9	17196	13596	32.27	0	11	35	0	0	0	0	0	0	0	0	0	5	0	7	5	5	23	0.142857	8	1	0	9	1	15227	1969	17196	0	1	0.142857	virus-like	NA	0	3	2	0	3	Medium-quality	52.98	AAI-based (high-confidence)	NA
Capsule1_02190909	4818	2178	29	6	6	21246	18846	37.41	0	11	24	0	0	0	0	0	0	0	0	0	4	0	5	4	4	15	0.166667	4	2	0	6	1	15216	6030	21246	0	1	0.166667	virus-like	NA	0	0	0	0	0	Low-quality	35.22	AAI-based (high-confidence)	NA
Capsule1_09052315	5006	2273	71	7	7	15205	12405	32.87	0	11	26	0	0	0	0	0	0	0	0	0	4	0	5	4	4	17	0.153846	7	0	0	7	1	15205	0	15205	0	1	0.153846	virus-like	NA	0	4	2	0	2	Low-quality	46.75	AAI-based (high-confidence)	NA
Capsule1_09232215	138014	3456	7	3	3	16946	15746	29.86	0	11	22	0	0	0	0	0	0	0	0	0	2	0	1	2	2	19	0.0909091	2	1	0	3	1	15203	1743	16946	0	1	0.0909091	virus-like	NA	0	1	0	1	0	Medium-quality	82.74	AAI-based (medium-confidence)	NA
Capsule1_15011922	49831	3869	15	4	4	20570	18970	38.03	0	11	16	0	0	0	0	0	0	0	0	0	5	0	1	5	5	10	0.3125	3	1	0	4	1	15195	5375	20570	0	1	0.3125	virus-like	NA	0	4	0	0	1	Low-quality	32.22	AAI-based (medium-confidence)	NA
Capsule1_13131622	44194	2106	5	3	3	16627	15427	31.12	0	11	22	0	0	0	0	0	0	0	0	0	0	0	5	0	0	17	0	2	1	0	3	1	15170	1457	16627	0	1	0	virus-like	NA	0	4	0	0	0	Low-quality	7.66	HMM-based (lower-bound)	high kmer_freq may indicate large duplication
Capsule1_14170103	68646	3736	25	5	5	17045	15045	46.73	0	11	30	0	0	0	0	0	0	0	0	0	4	0	1	4	4	25	0.133333	4	1	0	5	1	15072	1973	17045	0	1	0.133333	virus-like	NA	1	1	0	1	0	Low-quality	49.22	AAI-based (high-confidence)	NA
Capsule1_02141412	17608	2240	5	3	3	15039	13839	31.42	0	11	26	0	0	0	0	0	0	0	0	0	13	0	1	13	13	12	0.5	3	0	0	3	1	15039	0	15039	0	1	0.5	virus-like	NA	0	6	2	0	0	Low-quality	45.48	AAI-based (medium-confidence)	NA
Capsule1_09050118	255889	3994	7	4	4	17971	16371	32.75	0	11	24	0	0	0	0	0	0	0	0	0	3	0	4	3	3	17	0.125	2	2	0	4	1	15034	2937	17971	0	1	0.125	virus-like	NA	0	2	0	0	0	Medium-quality	64.13	AAI-based (high-confidence)	NA
Capsule1_00010518	258829	3239	10	1	1	15025	14625	30.84	0	11	17	0	0	0	0	0	0	0	0	0	2	2	0	2	4	13	0.235294	1	0	0	1	1	15025	0	15025	0	1	0.235294	virus-like	NA	1	0	0	2	0	Medium-quality	62.35	AAI-based (high-confidence)	NA
Capsule1_22131813	124294	3187	2	2	2	16475	15675	34.21	0	11	17	0	0	0	0	0	0	0	0	0	0	0	6	0	0	11	0	1	1	0	2	1	15007	1468	16475	0	1	0	virus-like	NA	0	5	0	0	0	Low-quality	32.66	AAI-based (medium-confidence)	NA
Capsule1_09200421	5566	2690	86	12	12	24088	19288	53.39	0	11	42	0	0	0	0	0	0	0	0	0	10	1	5	10	11	26	0.261905	7	4	1	11	0.916667	14973	8058	23031	1057	0.956119	0.273925	virus-like	NA	0	2	2	1	1	Medium-quality	52.52	AAI-based (medium-confidence)	NA
Capsule1_00230813	12750	3097	24	9	9	22024	18424	37.54	0	11	24	0	0	0	0	0	0	0	0	0	9	1	5	9	10	9	0.416667	5	4	0	9	1	14966	7058	22024	0	1	0.416667	virus-like	NA	0	7	0	0	0	Medium-quality	53.44	AAI-based (high-confidence)	NA
Capsule1_09112103	182068	4091	16	5	5	17814	15814	37.04	0	11	30	0	0	0	0	0	0	0	0	0	6	0	5	6	6	19	0.2	4	1	0	5	1	14963	2851	17814	0	1	0.2	virus-like	NA	0	5	0	1	0	Low-quality	47.49	AAI-based (high-confidence)	NA
Capsule1_13162222	89426	3078	5	3	3	14940	13740	30.98	0	11	27	0	0	0	0	0	0	0	0	0	2	0	3	2	2	22	0.0740741	3	0	0	3	1	14940	0	14940	0	1	0.0740741	virus-like	NA	0	2	0	1	0	Low-quality	47.24	AAI-based (high-confidence)	NA
Capsule1_16121915	35391	3126	9	3	3	14919	13719	31.66	0	11	23	0	0	0	0	0	0	0	0	0	9	0	3	9	9	11	0.391304	3	0	0	3	1	14919	0	14919	0	1	0.391304	virus-like	NA	0	5	0	0	1	Low-quality	45.87	AAI-based (medium-confidence)	NA
Capsule1_00151218	289711	3091	4	2	2	14827	14027	47.57	0	11	24	0	0	0	0	0	0	0	0	0	7	0	4	7	7	13	0.291667	2	0	0	2	1	14827	0	14827	0	1	0.291667	virus-like	NA	0	3	0	0	0	High-quality	92.53	AAI-based (high-confidence)	NA
Capsule1_17020300	113233	7280	23	8	8	42181	38981	39.7	0	11	52	0	0	0	0	0	0	0	0	0	14	0	8	14	14	30	0.269231	3	5	0	8	1	14814	27367	42181	0	1	0.269231	virus-like	NA	0	4	3	1	1	Medium-quality	56.18	HMM-based (lower-bound)	NA
Capsule1_17081516	93735	3626	15	6	6	19444	17044	47.81	0	11	24	0	0	0	0	0	0	0	0	0	4	2	6	4	6	12	0.25	3	3	0	6	1	14812	4632	19444	0	1	0.25	virus-like	NA	1	5	1	0	0	Low-quality	35.65	AAI-based (high-confidence)	NA
Capsule1_12090413	121247	4321	22	6	6	15837	13437	36.33	0	11	29	0	0	0	0	0	0	0	0	0	6	1	4	6	7	18	0.241379	5	1	0	6	1	14790	1047	15837	0	1	0.241379	virus-like	NA	0	3	1	0	0	Low-quality	20.82	AAI-based (medium-confidence)	NA
Capsule1_16050221	86263	3648	9	6	6	18060	15660	32.66	0	11	22	0	0	0	0	0	0	0	0	0	7	0	5	7	7	10	0.318182	4	1	1	5	0.833333	14785	1479	16264	1796	0.900554	0.353318	virus-like	NA	0	7	0	0	0	Low-quality	46.01	AAI-based (high-confidence)	NA
Capsule1_03020000	193817	3414	21	5	5	17454	15454	42.09	0	11	15	0	0	0	0	0	0	0	0	0	3	0	6	3	3	6	0.2	3	2	0	5	1	14777	2677	17454	0	1	0.2	virus-like	NA	0	6	1	0	0	Low-quality	32.39	AAI-based (high-confidence)	NA
Capsule1_13081722	79391	3112	3	1	1	14736	14336	56.02	0	11	22	0	0	0	0	0	0	0	0	1	2	1	2	3	4	16	0.181818	1	0	0	1	1	14736	0	14736	0	1	0.181818	virus-like	NA	0	2	0	1	0	Low-quality	19.66	HMM-based (lower-bound)	NA
Capsule1_21210412	135655	3724	12	5	5	19988	17988	39.73	0	11	33	0	0	0	0	0	0	0	0	0	3	1	5	3	4	24	0.121212	2	3	0	5	1	14709	5279	19988	0	1	0.121212	virus-like	NA	0	1	3	1	0	Low-quality	18.75	HMM-based (lower-bound)	NA
Capsule1_08170203	413848	3980	23	6	6	16762	14362	46.23	0	11	25	0	0	0	0	0	0	0	0	0	8	1	4	8	9	12	0.36	5	0	1	5	0.833333	14690	0	14690	2072	0.876387	0.410777	virus-like	NA	1	2	2	1	1	Low-quality	31.73	AAI-based (medium-confidence)	NA
Capsule1_01100515	116385	4542	24	8	8	20638	17438	37.19	0	11	37	0	0	0	0	0	0	0	0	1	5	1	2	6	7	28	0.189189	5	3	0	8	1	14656	5982	20638	0	1	0.189189	virus-like	NA	0	1	1	1	0	Low-quality	33.54	AAI-based (high-confidence)	NA
Capsule1_00221518	144603	3088	8	2	2	14641	13841	37.51	0	11	17	0	0	0	0	0	0	0	0	0	3	0	4	3	3	10	0.176471	2	0	0	2	1	14641	0	14641	0	1	0.176471	virus-like	NA	0	3	0	0	0	Low-quality	38.85	AAI-based (medium-confidence)	NA
Capsule1_02220018	112168	4669	9	5	5	23632	21632	44.03	0	11	29	0	0	0	0	0	0	0	0	0	8	0	6	8	8	15	0.275862	3	2	0	5	1	14629	9003	23632	0	1	0.275862	virus-like	NA	0	6	0	0	0	Medium-quality	66.24	AAI-based (medium-confidence)	NA
Capsule1_08040018	223308	5077	8	2	2	32299	31499	46.73	0	11	45	0	0	0	0	0	0	0	0	0	9	1	6	9	10	29	0.222222	1	1	0	2	1	14608	17691	32299	0	1	0.222222	virus-like	NA	0	1	2	0	0	Medium-quality	89.84	AAI-based (medium-confidence)	NA
Capsule1_17200010	173535	3317	16	6	6	15821	13421	32.58	0	11	22	0	0	0	0	0	0	0	0	0	6	0	1	6	6	15	0.272727	5	1	0	6	1	14603	1218	15821	0	1	0.272727	virus-like	NA	0	4	0	0	0	Low-quality	44.74	AAI-based (high-confidence)	NA
Capsule1_03081105	153614	4004	35	12	12	20676	15876	40.97	0	11	43	0	0	0	0	0	0	0	0	0	4	1	6	4	5	32	0.116279	8	4	0	12	1	14574	6102	20676	0	1	0.116279	virus-like	NA	0	7	0	0	0	Low-quality	31.65	AAI-based (high-confidence)	NA
Capsule1_02151912	69134	2798	3	1	1	14535	14135	30.48	0	11	31	0	0	0	0	0	0	0	0	0	8	1	2	8	9	20	0.290323	1	0	0	1	1	14535	0	14535	0	1	0.290323	virus-like	NA	0	2	1	0	1	Low-quality	49.28	AAI-based (high-confidence)	NA
Capsule1_21020016	45300	2895	10	5	5	14485	12485	31.25	0	11	24	0	0	0	0	0	0	0	0	0	5	1	0	5	6	18	0.25	5	0	0	5	1	14485	0	14485	0	1	0.25	virus-like	NA	0	3	0	0	0	Low-quality	43.65	AAI-based (medium-confidence)	NA
Capsule1_10011612	161327	3772	17	5	5	19092	17092	41.26	0	11	26	0	0	0	0	0	0	0	0	0	6	2	8	6	8	10	0.307692	2	2	1	4	0.8	14478	3577	18055	1037	0.945684	0.325365	virus-like	NA	2	4	1	2	0	Low-quality	39.66	AAI-based (medium-confidence)	NA
Capsule1_08181521	61426	2839	13	6	6	14443	12043	42.56	0	11	26	0	0	0	0	0	0	0	0	0	8	0	2	8	8	16	0.307692	6	0	0	6	1	14443	0	14443	0	1	0.307692	virus-like	NA	0	2	1	0	0	Low-quality	10.35	HMM-based (lower-bound)	NA
Capsule1_22142215	102436	3282	6	2	2	14411	13611	45.37	0	11	31	0	0	0	0	0	0	0	0	0	5	2	5	5	7	19	0.225806	2	0	0	2	1	14411	0	14411	0	1	0.225806	virus-like	NA	0	3	2	0	0	Low-quality	35.27	AAI-based (medium-confidence)	NA
Capsule1_06101306	162888	3828	10	4	4	17538	15938	50.37	0	11	27	0	0	0	0	0	0	0	0	0	8	0	2	8	8	17	0.296296	2	2	0	4	1	14394	3144	17538	0	1	0.296296	virus-like	NA	1	3	0	1	2	Low-quality	49.92	AAI-based (medium-confidence)	NA
Capsule1_04012121	216000	2867	8	4	4	15873	14273	39.87	0	11	28	0	0	0	0	0	0	0	0	1	7	0	4	8	8	16	0.285714	4	0	0	4	1	14359	0	14359	0	0.904618	0.31584	virus-like	NA	2	3	0	0	0	Low-quality	44.2	AAI-based (high-confidence)	NA
Capsule1_21130000	137484	3173	3	2	2	14338	13538	50	0	11	22	0	0	0	0	0	0	0	0	0	3	0	5	3	3	14	0.136364	2	0	0	2	1	14338	0	14338	0	1	0.136364	virus-like	NA	0	6	0	0	0	High-quality	99.91	AAI-based (high-confidence)	NA
Capsule1_16040615	70383	3812	15	4	4	22335	20735	42.74	0	11	28	0	0	0	0	0	0	0	0	2	5	0	3	7	7	18	0.25	2	2	0	4	1	14278	8057	22335	0	1	0.25	virus-like	NA	0	1	1	0	0	Low-quality	35.77	AAI-based (medium-confidence)	NA
Capsule1_17170018	221696	2942	4	1	1	14257	13857	45.51	0	11	23	0	0	0	0	0	0	0	0	0	2	0	3	2	2	18	0.0869565	1	0	0	1	1	14257	0	14257	0	1	0.0869565	virus-like	NA	0	4	0	0	0	High-quality	90.91	AAI-based (high-confidence)	NA
Capsule1_11160607	442895	3967	20	5	5	18851	16851	50.36	0	11	27	0	0	0	0	0	0	0	0	0	6	0	7	6	6	14	0.222222	2	3	0	5	1	14244	4607	18851	0	1	0.222222	virus-like	NA	1	2	1	2	0	Medium-quality	57.18	AAI-based (high-confidence)	NA
Capsule1_08131518	234527	3001	3	2	2	14128	13328	34.5	0	11	23	0	0	0	0	0	0	0	0	1	5	0	4	6	6	13	0.26087	2	0	0	2	1	14128	0	14128	0	1	0.26087	virus-like	NA	0	5	0	1	1	Low-quality	44.39	AAI-based (high-confidence)	NA
Capsule1_05111800	9017	3536	69	7	7	25176	22376	54.97	0	11	50	0	0	0	0	0	0	0	0	0	4	0	2	4	4	44	0.08	2	2	3	4	0.571429	14118	3133	17251	7925	0.685216	0.116751	virus-like	NA	0	0	1	1	0	Low-quality	11.95	HMM-based (lower-bound)	NA
Capsule1_12040803	135228	3662	13	5	5	14101	12101	42.19	0	11	22	0	0	0	0	0	0	0	0	0	8	0	2	8	8	12	0.363636	5	0	0	5	1	14101	0	14101	0	1	0.363636	virus-like	NA	0	3	0	0	1	Low-quality	38.89	AAI-based (high-confidence)	NA
Capsule1_07230016	35330	5575	24	11	11	38504	34104	58.71	0	11	50	0	0	0	0	0	0	0	0	0	7	0	0	7	7	43	0.14	1	6	4	7	0.636364	14096	16366	30462	7212	0.791139	0.17696	virus-like	NA	2	1	0	0	0	Low-quality	37.11	HMM-based (lower-bound)	NA
Capsule1_03202109	116400	3417	9	3	3	15193	13993	44.48	0	11	18	0	0	0	0	0	0	0	0	0	5	1	2	5	6	10	0.333333	2	1	0	3	1	14086	1107	15193	0	1	0.333333	virus-like	NA	1	3	0	0	0	Low-quality	44.87	AAI-based (high-confidence)	NA
Capsule1_06092209	332694	3926	18	6	6	20574	18174	44.93	0	11	30	0	0	0	0	0	0	0	0	1	8	2	7	9	11	12	0.366667	4	1	1	5	0.833333	14010	4741	18751	1823	0.911393	0.402315	virus-like	NA	0	0	6	2	0	Low-quality	23.69	AAI-based (medium-confidence)	NA
Capsule1_01200217	2961	1517	16	5	5	15068	13068	42.26	0	11	24	0	0	0	0	0	0	0	0	0	9	0	4	9	9	11	0.375	4	1	0	5	1	14000	1068	15068	0	1	0.375	virus-like	NA	0	8	0	0	0	Low-quality	36.69	AAI-based (medium-confidence)	NA
Capsule1_04190612	68555	3183	13	4	4	17214	15614	34.15	0	11	20	0	0	0	0	0	0	0	0	1	3	1	2	4	5	13	0.25	3	1	0	4	1	13984	1311	15295	0	0.888521	0.281366	virus-like	NA	0	4	0	0	1	Low-quality	8.68	AAI-based (medium-confidence)	NA
Capsule1_00110713	332007	1676	2	1	1	13914	13514	38.54	0	11	12	0	0	0	0	0	0	0	0	0	0	0	4	0	0	8	0	1	0	0	1	1	13914	0	13914	0	1	0	virus-like	NA	0	0	0	0	0	Low-quality	22.47	HMM-based (lower-bound)	high kmer_freq may indicate large duplication; low-confidence ITR
Capsule1_17080112	83484	2288	3	2	2	13894	13094	47.1	0	11	17	0	0	0	0	0	0	0	0	0	9	0	1	9	9	7	0.529412	2	0	0	2	1	13894	0	13894	0	1	0.529412	virus-like	NA	0	3	0	0	0	Low-quality	45.27	AAI-based (high-confidence)	NA
Capsule1_12060015	103370	4042	8	5	5	33405	31405	55.73	0	11	62	0	0	0	0	0	0	0	0	0	13	0	0	13	13	49	0.209677	2	2	1	4	0.8	13884	16724	30608	2797	0.91627	0.228838	virus-like	NA	0	6	3	1	2	Medium-quality	83.93	AAI-based (high-confidence)	high kmer_freq may indicate large duplication
Capsule1_03021803	284601	3167	6	1	1	13865	13465	29.57	0	11	37	0	0	0	0	0	0	0	0	0	7	0	4	7	7	26	0.189189	1	0	0	1	1	13865	0	13865	0	1	0.189189	virus-like	NA	0	2	1	0	2	Low-quality	41.73	AAI-based (high-confidence)	NA
Capsule1_10231123	207583	2550	5	2	2	13808	13008	33.94	0	11	10	0	0	0	0	0	0	0	0	0	1	2	1	1	3	6	0.3	2	0	0	2	1	13808	0	13808	0	1	0.3	virus-like	NA	0	0	1	0	0	Low-quality	1.12	HMM-based (lower-bound)	NA
Capsule1_05161023	89136	3020	17	6	6	16853	14453	56.18	0	11	35	0	0	0	0	0	0	0	0	0	9	1	1	9	10	24	0.285714	4	2	0	6	1	13741	2383	16124	0	0.956744	0.298632	virus-like	NA	0	2	1	0	0	Low-quality	37.1	AAI-based (medium-confidence)	NA
Capsule1_07051706	98478	3720	35	8	8	19826	16626	38.46	0	11	40	0	0	0	0	0	0	0	0	2	6	0	1	8	8	31	0.2	5	2	1	7	0.875	13741	4971	18712	1114	0.943811	0.211907	virus-like	NA	0	0	2	0	0	Low-quality	10.91	AAI-based (medium-confidence)	NA
Capsule1_00012204	95603	3213	21	5	5	13738	11738	49.74	0	11	22	0	0	0	0	0	0	0	0	0	5	0	2	5	5	15	0.227273	5	0	0	5	1	13738	0	13738	0	1	0.227273	virus-like	NA	0	4	0	1	0	Low-quality	42.53	AAI-based (medium-confidence)	NA
Capsule1_07100810	124405	2810	6	1	1	13725	13325	40.93	0	11	17	0	0	0	0	0	0	0	0	0	2	2	1	2	4	12	0.235294	1	0	0	1	1	13725	0	13725	0	1	0.235294	virus-like	NA	0	0	0	0	0	Low-quality	3.72	HMM-based (lower-bound)	NA
Capsule1_07010815	49215	2728	7	2	2	13708	12908	39.63	0	11	24	0	0	0	0	0	0	0	0	0	4	1	7	4	5	12	0.208333	2	0	0	2	1	13708	0	13708	0	1	0.208333	virus-like	NA	0	5	0	0	0	Low-quality	28.43	AAI-based (medium-confidence)	NA
Capsule1_21110522	73051	2830	8	3	3	13692	12492	47.54	0	11	24	0	0	0	0	0	0	0	0	0	3	1	1	3	4	19	0.166667	3	0	0	3	1	13692	0	13692	0	1	0.166667	virus-like	NA	0	1	0	0	0	Low-quality	47.09	AAI-based (medium-confidence)	NA
Capsule1_02091012	100138	3493	14	1	1	13664	13264	37.7	0	11	16	0	0	0	0	0	0	0	0	0	5	0	2	5	5	9	0.3125	1	0	0	1	1	13664	0	13664	0	1	0.3125	virus-like	NA	0	2	0	0	0	Low-quality	40.44	AAI-based (high-confidence)	NA
Capsule1_10050018	162956	4256	12	3	3	18867	17667	53.82	0	11	23	0	0	0	0	0	0	0	0	0	14	0	1	14	14	8	0.608696	2	1	0	3	1	13618	5249	18867	0	1	0.608696	virus-like	NA	0	6	1	0	0	Medium-quality	51.77	AAI-based (medium-confidence)	NA
Capsule1_23191414	134586	3254	8	4	4	14691	13091	39.87	0	11	21	0	0	0	0	0	0	0	0	0	6	0	3	6	6	12	0.285714	3	1	0	4	1	13586	1105	14691	0	1	0.285714	virus-like	NA	0	5	0	0	1	Medium-quality	52.27	AAI-based (high-confidence)	NA
Capsule1_07221018	80204	3889	18	4	4	16601	15001	32.17	0	11	13	0	0	0	0	0	0	0	0	0	3	0	1	3	3	9	0.230769	2	1	1	3	0.75	13551	1222	14773	1828	0.889886	0.259324	virus-like	NA	0	1	0	0	0	Low-quality	23.67	AAI-based (medium-confidence)	NA
Capsule1_09050014	152917	2744	1	1	1	13544	13144	40.26	0	11	15	0	0	0	0	0	0	0	0	1	0	0	1	1	1	13	0.0666667	1	0	0	1	1	13544	0	13544	0	1	0.0666667	virus-like	NA	0	0	0	0	0	Medium-quality	65.89	AAI-based (medium-confidence)	NA
Capsule1_13230009	152524	2865	12	4	4	14941	13341	36.54	0	11	17	0	0	0	0	0	0	0	0	0	1	0	0	1	1	16	0.0588235	3	1	0	4	1	13526	1415	14941	0	1	0.0588235	virus-like	NA	0	2	0	0	0	Low-quality	23.25	AAI-based (medium-confidence)	NA
Capsule1_13022311	33493	2133	7	2	2	13522	12722	40.91	0	11	9	0	0	0	0	0	0	0	0	0	0	0	7	0	0	2	0	2	0	0	2	1	13522	0	13522	0	1	0	virus-like	NA	0	6	0	0	0	Low-quality	3.68	HMM-based (lower-bound)	high kmer_freq may indicate large duplication
Capsule1_20202100	120813	2680	12	5	5	14549	12549	50.47	0	11	25	0	0	0	0	0	0	0	0	0	5	0	7	5	5	13	0.2	4	1	0	5	1	13501	1048	14549	0	1	0.2	virus-like	NA	0	6	0	0	0	Low-quality	42.74	AAI-based (medium-confidence)	NA
Capsule1_08110018	3288	1713	13	3	3	14560	13360	35.49	0	11	15	0	0	0	0	0	0	0	0	0	2	2	3	2	4	8	0.266667	2	1	0	3	1	13492	1068	14560	0	1	0.266667	virus-like	NA	0	6	0	0	1	Low-quality	22.48	AAI-based (medium-confidence)	NA
Capsule1_04131823	278434	7002	19	7	7	36510	33710	54.89	0	11	66	0	0	0	0	0	0	0	0	0	8	1	0	8	9	57	0.136364	4	2	1	6	0.857143	13471	21842	35313	1197	0.967214	0.140986	virus-like	NA	0	4	1	0	0	Medium-quality	72.5	AAI-based (medium-confidence)	NA
Capsule1_23231018	21829	3322	20	6	6	16578	14178	37.92	0	11	29	0	0	0	0	0	0	0	0	1	5	0	1	6	6	22	0.206897	4	2	0	6	1	13451	3127	16578	0	1	0.206897	virus-like	NA	0	2	0	0	1	Low-quality	26.53	AAI-based (high-confidence)	NA
Capsule1_00150919	107581	3107	13	4	4	13422	11822	30.93	0	11	27	0	0	0	0	0	0	0	0	0	2	0	4	2	2	21	0.0740741	4	0	0	4	1	13422	0	13422	0	1	0.0740741	virus-like	NA	0	2	0	1	0	Low-quality	36.95	AAI-based (high-confidence)	NA
Capsule1_16081913	65122	2356	6	2	2	13422	12622	30.98	0	11	23	0	0	0	0	0	0	0	0	0	8	0	0	8	8	15	0.347826	2	0	0	2	1	13422	0	13422	0	1	0.347826	virus-like	NA	0	2	1	1	0	Low-quality	41.7	AAI-based (high-confidence)	NA
Capsule1_04062209	424880	5778	29	10	10	34236	30236	51.08	0	11	54	0	0	0	0	0	0	0	0	1	5	0	2	6	6	46	0.111111	4	4	2	8	0.8	13399	16474	29873	4363	0.872561	0.127339	virus-like	NA	1	1	1	0	1	Not-determined	0	NA	no viral genes detected
Capsule1_14100919	129958	4192	15	9	9	23391	19791	63.61	0	11	41	0	0	0	0	0	0	0	0	1	4	0	3	5	5	33	0.121951	2	5	2	7	0.777778	13335	6592	19927	2990	0.851909	0.143151	virus-like	NA	0	2	0	1	0	Low-quality	37.12	AAI-based (medium-confidence)	NA
Capsule1_23221904	117747	3821	18	6	6	15670	13270	39.46	0	11	27	0	0	0	0	0	0	0	0	1	8	0	1	9	9	17	0.333333	4	2	0	6	1	13294	2376	15670	0	1	0.333333	virus-like	NA	0	2	0	0	0	Low-quality	30.25	HMM-based (lower-bound)	NA
Capsule1_19230200	63366	3360	10	3	3	14664	13464	32.76	0	11	18	0	0	0	0	0	0	0	0	0	5	0	4	5	5	9	0.277778	2	1	0	3	1	13251	1413	14664	0	1	0.277778	virus-like	NA	0	5	0	0	0	Low-quality	40.36	AAI-based (high-confidence)	NA
Capsule1_05080012	27215	1645	9	3	3	13244	12044	37.45	0	11	19	0	0	0	0	0	0	0	0	0	5	2	8	5	7	4	0.368421	3	0	0	3	1	13244	0	13244	0	1	0.368421	virus-like	NA	0	10	4	0	0	Low-quality	20.71	HMM-based (lower-bound)	high kmer_freq may indicate large duplication
Capsule1_20100320	160089	3699	3	2	2	17757	16957	32.71	0	11	42	0	0	0	0	0	0	0	0	0	1	0	0	1	1	41	0.0238095	1	1	0	2	1	13232	4525	17757	0	1	0.0238095	virus-like	NA	0	0	0	1	0	Medium-quality	52.72	HMM-based (lower-bound)	NA
Capsule1_12092003	2717	1344	29	6	6	14488	12088	39.65	0	11	24	0	0	0	0	0	0	0	0	0	5	0	4	5	5	15	0.208333	5	1	0	6	1	13227	1261	14488	0	1	0.208333	virus-like	NA	0	4	0	0	0	Low-quality	21.75	AAI-based (medium-confidence)	NA
Capsule1_04082109	77867	2632	13	4	4	16146	14546	44.4	0	11	23	0	0	0	0	0	0	0	0	0	6	2	2	6	8	13	0.347826	3	1	0	4	1	13225	2921	16146	0	1	0.347826	virus-like	NA	2	1	0	1	0	Low-quality	41.05	AAI-based (high-confidence)	NA
Capsule1_20130209	95556	4885	20	8	8	25359	22159	35.26	0	11	37	0	0	0	0	0	0	0	0	2	8	1	0	10	11	26	0.297297	4	4	0	8	1	13191	12168	25359	0	1	0.297297	virus-like	NA	0	2	0	2	0	Low-quality	43.05	AAI-based (high-confidence)	NA
Capsule1_00191918	6076	2715	17	5	5	25506	23506	37.11	0	11	27	0	0	0	0	0	0	0	0	1	6	0	5	7	7	15	0.259259	3	2	0	5	1	13184	12322	25506	0	1	0.259259	virus-like	NA	0	4	0	1	0	Low-quality	43.91	AAI-based (high-confidence)	NA
Capsule1_16190521	57181	3257	14	5	5	18230	16230	37.97	0	11	17	0	0	0	0	0	0	0	0	0	1	0	2	1	1	14	0.0588235	3	1	1	4	0.8	13182	1435	14617	3613	0.80181	0.0733634	virus-like	NA	0	0	0	0	0	Low-quality	23.09	AAI-based (high-confidence)	NA
Capsule1_00020012	64365	3583	18	5	5	15512	13512	34.07	0	11	21	0	0	0	0	0	0	0	0	0	3	0	6	3	3	12	0.142857	4	1	0	5	1	13180	2332	15512	0	1	0.142857	virus-like	NA	0	3	2	0	0	Low-quality	25.36	AAI-based (high-confidence)	NA
Capsule1_01231612	45663	2747	15	4	4	13118	11518	31.17	0	11	29	0	0	0	0	0	0	0	0	0	13	0	3	13	13	13	0.448276	4	0	0	4	1	13118	0	13118	0	1	0.448276	virus-like	NA	0	3	1	2	0	Low-quality	33.71	AAI-based (high-confidence)	NA
Capsule1_04002102	5749	2391	19	6	6	14920	12520	37.4	0	11	28	0	0	0	0	0	0	0	0	0	5	2	5	5	7	16	0.25	5	1	0	6	1	13087	1833	14920	0	1	0.25	virus-like	NA	0	2	0	0	2	Low-quality	38.31	AAI-based (high-confidence)	NA
Capsule1_06051909	133660	4161	29	8	8	18242	15042	46.68	0	11	25	0	0	0	0	0	0	0	0	0	6	0	4	6	6	15	0.24	4	3	1	7	0.875	13072	4143	17215	1027	0.943701	0.254318	virus-like	NA	0	6	0	0	0	Low-quality	30.02	AAI-based (high-confidence)	NA
Capsule1_20131717	108860	3293	18	6	6	15676	13276	46.72	0	11	26	0	0	0	0	0	0	0	0	0	5	1	2	5	6	18	0.230769	5	1	0	6	1	13066	2610	15676	0	1	0.230769	virus-like	NA	0	1	1	0	0	Low-quality	43.84	AAI-based (medium-confidence)	no viral genes detected
Capsule1_09230104	39127	3923	17	9	9	22554	18954	59.25	0	11	52	0	0	0	0	0	0	0	0	1	7	0	2	8	8	42	0.153846	4	1	4	5	0.555556	13033	1169	14202	8352	0.629689	0.244321	virus-like	NA	1	1	1	0	1	Low-quality	21.62	AAI-based (medium-confidence)	NA
Capsule1_19170804	94826	2806	8	3	3	13023	11823	36.38	0	11	19	0	0	0	0	0	0	0	0	0	3	0	2	3	3	14	0.157895	3	0	0	3	1	13023	0	13023	0	1	0.157895	virus-like	NA	0	2	0	0	0	Low-quality	38.65	AAI-based (medium-confidence)	NA
Capsule1_00050918	5798	2549	42	6	6	24353	21953	33.67	0	11	14	0	0	0	0	0	0	0	0	0	0	0	0	0	0	0	0	2	3	1	5	0.833333	12990	10149	23139	1214	0.95015	0	virus-like	NA	0	0	0	0	0	Low-quality	26.68	AAI-based (high-confidence)	NA
Capsule1_09170118	127554	4029	11	3	3	18220	17020	34.73	0	11	32	0	0	0	0	0	0	0	0	0	12	0	4	12	12	16	0.375	1	2	0	3	1	12956	5264	18220	0	1	0.375	virus-like	NA	1	4	1	1	1	Medium-quality	64.02	AAI-based (high-confidence)	NA
Capsule1_03170718	304831	3504	6	2	2	16106	15306	46.81	0	11	18	0	0	0	0	0	0	0	0	0	8	0	4	8	8	6	0.444444	1	1	0	2	1	12912	3194	16106	0	1	0.444444	virus-like	NA	0	6	1	0	0	Low-quality	42	AAI-based (high-confidence)	NA
Capsule1_04071620	69727	2514	10	4	4	12897	11297	33.23	0	11	17	0	0	0	0	0	0	0	0	0	1	1	0	1	2	15	0.117647	4	0	0	4	1	12897	0	12897	0	1	0.117647	virus-like	NA	0	0	0	0	0	Low-quality	21.56	AAI-based (medium-confidence)	NA
Capsule1_11051812	81531	3511	15	3	3	14207	13007	36.93	0	11	25	0	0	0	0	0	0	0	0	0	3	0	2	3	3	20	0.12	2	1	0	3	1	12886	1321	14207	0	1	0.12	virus-like	NA	0	2	0	1	0	Low-quality	45.17	AAI-based (high-confidence)	NA
Capsule1_03020705	386324	3028	11	3	3	14047	12847	45.15	0	11	16	0	0	0	0	0	0	0	0	0	7	0	4	7	7	5	0.4375	2	1	0	3	1	12851	1196	14047	0	1	0.4375	virus-like	NA	0	4	0	0	0	Low-quality	43.31	AAI-based (high-confidence)	NA
Capsule1_00200421	4223	2068	69	10	10	17937	13937	53.07	0	11	36	0	0	0	0	0	0	0	0	0	5	1	5	5	6	25	0.166667	6	3	1	9	0.9	12837	4080	16917	1020	0.943134	0.176716	virus-like	NA	0	4	0	0	0	Low-quality	34.84	AAI-based (medium-confidence)	NA
Capsule1_13082109	267514	4868	8	4	4	27467	25867	38.84	0	11	34	0	0	0	0	0	0	0	0	0	4	0	1	4	4	29	0.117647	2	2	0	4	1	12759	14708	27467	0	1	0.117647	virus-like	NA	0	0	1	0	0	Medium-quality	76.13	AAI-based (medium-confidence)	NA
Capsule1_05031705	179336	4015	14	5	5	17866	15866	34.19	0	11	20	0	0	0	0	0	0	0	0	0	1	0	9	1	1	10	0.05	3	2	0	5	1	12682	5184	17866	0	1	0.05	virus-like	NA	1	7	2	0	0	Low-quality	43.36	AAI-based (high-confidence)	NA
Capsule1_14041506	220143	2758	6	2	2	12682	11882	30.09	0	11	15	0	0	0	0	0	0	0	0	0	4	0	3	4	4	8	0.266667	2	0	0	2	1	12682	0	12682	0	1	0.266667	virus-like	NA	0	1	0	0	0	Low-quality	38.58	AAI-based (high-confidence)	NA
Capsule1_02092309	171173	4014	10	4	4	18328	16728	46.01	0	11	19	0	0	0	0	0	0	0	0	0	4	1	10	4	5	4	0.263158	3	1	0	4	1	12673	5655	18328	0	1	0.263158	virus-like	NA	0	10	0	0	0	Low-quality	45.87	AAI-based (high-confidence)	NA
Capsule1_08142109	124535	2846	15	5	5	15212	13212	35.29	0	11	28	0	0	0	0	0	0	0	0	0	4	1	3	4	5	20	0.178571	3	2	0	5	1	12622	2590	15212	0	1	0.178571	virus-like	NA	0	2	0	1	0	Low-quality	33.98	AAI-based (medium-confidence)	NA
Capsule1_14011018	167855	3647	16	8	8	21522	18322	35.12	0	11	31	0	0	0	0	0	0	0	0	1	6	1	4	7	8	19	0.258065	3	5	0	8	1	12588	8934	21522	0	1	0.258065	virus-like	NA	0	1	2	0	0	Low-quality	34.18	AAI-based (medium-confidence)	NA
Capsule1_07232118	80657	1409	4	1	1	12583	12183	31.54	0	11	12	0	0	0	0	0	0	0	0	0	7	0	2	7	7	3	0.583333	1	0	0	1	1	12583	0	12583	0	1	0.583333	virus-like	NA	0	4	0	0	0	Low-quality	39.1	AAI-based (high-confidence)	high kmer_freq may indicate large duplication; low-confidence ITR
Capsule1_04230813	4289	1909	22	2	2	12556	11756	39.93	0	11	12	0	0	0	0	0	0	0	0	0	4	1	4	4	5	3	0.416667	2	0	0	2	1	12556	0	12556	0	1	0.416667	virus-like	NA	0	5	0	0	0	Low-quality	29.69	AAI-based (high-confidence)	NA
Capsule1_13042216	125258	5736	21	10	10	35876	31876	30.07	0	11	37	0	0	0	0	0	0	0	0	0	3	1	4	3	4	29	0.108108	6	4	0	10	1	12550	23326	35876	0	1	0.108108	virus-like	NA	0	5	0	0	0	Medium-quality	66.91	AAI-based (high-confidence)	NA
Capsule1_12130711	352134	3620	12	5	5	16288	14288	46.16	0	11	24	0	0	0	0	0	0	0	0	0	2	1	2	2	3	19	0.125	3	0	2	3	0.6	12541	0	12541	3747	0.769953	0.162348	virus-like	NA	0	2	0	0	0	Low-quality	32.62	AAI-based (high-confidence)	NA
Capsule1_17202218	224108	2856	9	3	3	13894	12694	34.14	0	11	22	0	0	0	0	0	0	0	0	0	3	0	3	3	3	16	0.136364	2	1	0	3	1	12540	1354	13894	0	1	0.136364	virus-like	NA	0	3	0	0	0	Low-quality	44.6	AAI-based (high-confidence)	NA
Capsule1_18082209	80816	3092	9	6	6	15250	12850	31.62	0	11	25	0	0	0	0	0	0	0	0	1	7	0	2	8	8	15	0.32	4	2	0	6	1	12519	2731	15250	0	1	0.32	virus-like	NA	0	2	3	1	0	Low-quality	44	AAI-based (high-confidence)	NA
Capsule1_15051500	122841	2586	9	3	3	18923	17723	46.19	0	11	34	0	0	0	0	0	0	0	0	0	8	0	6	8	8	20	0.235294	1	2	0	3	1	12434	6489	18923	0	1	0.235294	virus-like	NA	0	5	4	2	1	Low-quality	42.42	AAI-based (medium-confidence)	NA
Capsule1_13031203	418519	4236	19	7	6	20625	17225	47.98	0	11	22	0	0	0	0	0	0	0	0	0	0	0	2	0	0	20	0	4	3	0	7	1	12433	8192	20625	0	1	0	virus-like	NA	0	0	0	0	0	Medium-quality	52.43	AAI-based (high-confidence)	NA
Capsule1_16190201	27376	2624	9	4	4	12396	10796	30.97	0	11	12	0	0	0	0	0	0	0	0	0	1	1	1	1	2	9	0.166667	4	0	0	4	1	12396	0	12396	0	1	0.166667	virus-like	NA	1	0	0	0	0	Low-quality	3.27	HMM-based (lower-bound)	NA
Capsule1_09062317	122851	2573	11	5	5	14394	12394	30.72	0	11	29	0	0	0	0	0	0	0	0	0	5	1	1	5	6	22	0.206897	4	1	0	5	1	12347	2047	14394	0	1	0.206897	virus-like	NA	0	3	0	0	0	Low-quality	44.67	AAI-based (high-confidence)	NA
Capsule1_16201804	27391	3306	13	5	5	15098	13098	45.09	0	11	17	0	0	0	0	0	0	0	0	0	2	1	4	2	3	10	0.176471	3	2	0	5	1	12336	2762	15098	0	1	0.176471	virus-like	NA	0	3	0	0	0	Low-quality	41.34	AAI-based (high-confidence)	low-confidence DTR
Capsule1_12001519	57522	4133	10	5	5	22094	20094	39.49	0	11	31	0	0	0	0	0	0	0	0	0	1	0	2	1	1	28	0.0322581	1	2	2	3	0.6	12333	6136	18469	3625	0.835928	0.0385895	virus-like	NA	0	3	0	0	0	Medium-quality	65.52	AAI-based (medium-confidence)	NA
Capsule1_05110309	119153	3117	18	5	5	12308	10308	52.44	0	11	20	0	0	0	0	0	0	0	0	1	6	0	3	7	7	10	0.35	5	0	0	5	1	12308	0	12308	0	1	0.35	virus-like	NA	1	5	0	0	0	Low-quality	14.07	HMM-based (lower-bound)	NA
Capsule1_05052120	130183	2414	6	3	3	12267	11067	45.23	0	11	23	0	0	0	0	0	0	0	0	0	7	1	4	7	8	11	0.347826	3	0	0	3	1	12267	0	12267	0	1	0.347826	virus-like	NA	1	5	1	0	0	Medium-quality	71.51	AAI-based (high-confidence)	NA
Capsule1_13050212	137208	4027	18	5	5	19731	17731	53.14	0	11	24	0	0	0	0	0	0	0	0	0	8	0	3	8	8	13	0.333333	2	3	0	5	1	12215	7516	19731	0	1	0.333333	virus-like	NA	0	1	1	0	0	Low-quality	42.69	AAI-based (medium-confidence)	NA
Capsule1_06171921	258489	2809	2	2	2	13340	12540	47.95	0	11	24	0	0	0	0	0	0	0	0	1	8	0	1	9	9	14	0.375	1	1	0	2	1	12187	1153	13340	0	1	0.375	virus-like	NA	0	5	0	0	0	Low-quality	49.81	AAI-based (medium-confidence)	NA
Capsule1_11121520	78336	4136	33	6	6	14565	12165	40.58	0	11	24	0	0	0	0	0	0	0	0	1	8	1	5	9	10	9	0.416667	5	1	0	6	1	12187	2378	14565	0	1	0.416667	virus-like	NA	0	3	1	0	0	Low-quality	23.95	AAI-based (high-confidence)	NA
Capsule1_16021021	58726	2846	11	4	4	14325	12725	37.76	0	11	15	0	0	0	0	0	0	0	0	0	3	0	4	3	3	8	0.2	3	1	0	4	1	12159	2166	14325	0	1	0.2	virus-like	NA	0	1	0	1	0	Low-quality	23.62	AAI-based (high-confidence)	NA
Capsule1_16231719	25858	2805	13	4	4	14858	13258	34.33	0	11	14	0	0	0	0	0	0	0	0	0	1	1	1	1	2	11	0.142857	3	1	0	4	1	12142	2716	14858	0	1	0.142857	virus-like	NA	0	1	0	0	0	Low-quality	14.73	HMM-based (lower-bound)	NA
Capsule1_10160412	99061	2826	10	2	2	12105	11305	33	0	11	22	0	0	0	0	0	0	0	0	0	5	1	4	5	6	12	0.272727	2	0	0	2	1	12105	0	12105	0	1	0.272727	virus-like	NA	0	0	4	1	0	Low-quality	28.74	AAI-based (medium-confidence)	NA
Capsule1_18031518	234805	4251	26	7	7	25747	22947	47.68	0	11	33	0	0	0	0	0	0	0	0	0	8	0	3	8	8	22	0.242424	4	3	0	7	1	12068	13679	25747	0	1	0.242424	virus-like	NA	0	2	1	1	1	Low-quality	49.83	AAI-based (high-confidence)	NA
Capsule1_18092003	3574	1639	44	5	5	13628	11628	39.88	0	11	24	0	0	0	0	0	0	0	0	0	4	1	6	4	5	13	0.208333	4	1	0	5	1	12003	1625	13628	0	1	0.208333	virus-like	NA	0	6	0	0	0	Low-quality	13	HMM-based (lower-bound)	NA
Capsule1_09191918	8985	3710	28	4	4	24565	22965	36.96	0	11	25	0	0	0	0	0	0	0	0	1	5	0	4	6	6	15	0.24	3	1	0	4	1	11956	12609	24565	0	1	0.24	virus-like	NA	0	4	0	0	0	Low-quality	42.2	AAI-based (high-confidence)	NA
Capsule1_08190909	4249	1892	36	6	6	16312	13912	36.95	0	11	21	0	0	0	0	0	0	0	0	0	2	0	5	2	2	14	0.0952381	3	1	2	4	0.666667	11952	2036	13988	2324	0.857528	0.111061	virus-like	NA	0	0	0	0	0	Low-quality	23.15	AAI-based (high-confidence)	NA
Capsule1_15011422	184775	2821	10	3	3	13653	12453	34.28	0	11	17	0	0	0	0	0	0	0	0	2	3	1	9	5	6	2	0.352941	2	1	0	3	1	11883	1770	13653	0	1	0.352941	virus-like	NA	0	5	3	0	0	Low-quality	7.63	AAI-based (medium-confidence)	NA
Capsule1_00050009	114100	2862	6	3	3	11867	10667	34.64	0	11	21	0	0	0	0	0	0	0	0	1	5	0	4	6	6	11	0.285714	3	0	0	3	1	11867	0	11867	0	1	0.285714	virus-like	NA	1	5	0	1	0	Low-quality	19.13	HMM-based (lower-bound)	NA
Capsule1_03040903	202039	2464	9	3	3	14174	12974	46.61	0	11	24	0	0	0	0	0	0	0	0	0	6	0	8	6	6	10	0.25	2	1	0	3	1	11853	2321	14174	0	1	0.25	virus-like	NA	0	6	3	2	0	Low-quality	32.72	AAI-based (high-confidence)	NA
Capsule1_00080403	4039	1860	15	3	3	11764	10564	54.09	0	11	19	0	0	0	0	0	0	0	0	0	1	0	1	1	1	17	0.0526316	3	0	0	3	1	11764	0	11764	0	1	0.0526316	virus-like	NA	0	1	1	0	0	Low-quality	32.18	AAI-based (medium-confidence)	NA
Capsule1_20050315	152176	3556	17	7	7	18266	15466	24.09	0	11	14	0	0	0	0	0	0	0	0	0	0	0	6	0	0	8	0	5	2	0	7	1	11759	6507	18266	0	1	0	virus-like	NA	0	1	1	1	0	Medium-quality	75.37	AAI-based (medium-confidence)	NA
Capsule1_04070421	198504	3153	20	4	4	11731	10131	32.81	0	11	22	0	0	0	0	0	0	0	0	0	4	0	3	4	4	15	0.181818	4	0	0	4	1	11731	0	11731	0	1	0.181818	virus-like	NA	0	3	0	0	0	Low-quality	36.58	AAI-based (medium-confidence)	NA
Capsule1_16170721	41992	3216	20	6	6	16523	14123	65.4	0	11	16	0	0	0	0	0	0	0	0	0	1	0	5	1	1	10	0.0625	2	3	1	5	0.833333	11721	3141	14862	1661	0.899473	0.0694851	virus-like	NA	0	4	1	0	0	Low-quality	10.3	HMM-based (lower-bound)	NA
Capsule1_14091215	59742	2107	8	2	2	11719	10919	36.59	0	11	13	0	0	0	0	0	0	0	0	0	0	0	8	0	0	5	0	2	0	0	2	1	11719	0	11719	0	1	0	virus-like	NA	0	3	0	1	0	Low-quality	31.56	AAI-based (high-confidence)	NA
Capsule1_12231421	126309	3805	18	5	5	14927	12927	45.79	0	11	22	0	0	0	0	0	0	0	0	0	3	1	6	3	4	12	0.181818	3	2	0	5	1	11671	3256	14927	0	1	0.181818	virus-like	NA	0	5	1	0	1	Low-quality	40.76	AAI-based (high-confidence)	NA
Capsule1_04220506	283702	2494	3	1	1	11600	11200	43.59	0	11	16	0	0	0	0	0	0	0	0	0	3	0	3	3	3	10	0.1875	1	0	0	1	1	11600	0	11600	0	1	0.1875	virus-like	NA	0	3	0	0	0	Medium-quality	70.84	AAI-based (high-confidence)	NA
Capsule1_07190909	3292	1607	30	4	4	13646	12046	37.6	0	11	17	0	0	0	0	0	0	0	0	0	1	0	4	1	1	12	0.0588235	3	1	0	4	1	11591	2055	13646	0	1	0.0588235	virus-like	NA	0	0	0	0	0	Low-quality	25.6	AAI-based (high-confidence)	NA
Capsule1_11012201	91210	2416	3	1	1	11586	11186	41.96	0	11	20	0	0	0	0	0	0	0	0	0	3	0	2	3	3	15	0.15	1	0	0	1	1	11586	0	11586	0	1	0.15	virus-like	NA	0	4	0	0	0	Medium-quality	72.23	AAI-based (high-confidence)	NA
Capsule1_03162113	288378	2612	6	2	2	11576	10776	36.02	0	11	11	0	0	0	0	0	0	0	0	0	3	0	0	3	3	8	0.272727	2	0	0	2	1	11576	0	11576	0	1	0.272727	virus-like	NA	0	1	0	0	0	Low-quality	18.47	AAI-based (high-confidence)	NA
Capsule1_00111411	258198	2806	13	4	4	12636	11036	44.49	0	11	17	0	0	0	0	0	0	0	0	0	4	0	5	4	4	8	0.235294	3	1	0	4	1	11543	1093	12636	0	1	0.235294	virus-like	NA	0	8	0	0	0	Low-quality	33.53	AAI-based (high-confidence)	NA
Capsule1_05172008	80306	3418	6	4	4	17509	15909	46.76	0	11	24	0	0	0	0	0	0	0	0	0	4	0	5	4	4	15	0.166667	2	2	0	4	1	11538	5971	17509	0	1	0.166667	virus-like	NA	1	4	0	1	0	Medium-quality	54	AAI-based (high-confidence)	NA
Capsule1_03092003	3837	1812	63	6	6	14085	11685	40.32	0	11	27	0	0	0	0	0	0	0	0	0	3	0	5	3	3	19	0.111111	5	1	0	6	1	11530	2555	14085	0	1	0.111111	virus-like	NA	0	7	0	0	0	Low-quality	21.34	AAI-based (medium-confidence)	NA
Capsule1_11082113	97718	3024	13	3	3	14166	12966	33.7	0	11	17	0	0	0	0	0	0	0	0	0	1	1	2	1	2	13	0.117647	2	1	0	3	1	11515	2651	14166	0	1	0.117647	virus-like	NA	0	0	0	0	0	Low-quality	5.31	HMM-based (lower-bound)	NA
Capsule1_02052208	25435	1983	13	2	2	13782	12982	38.22	0	11	20	0	0	0	0	0	0	0	0	0	4	0	2	4	4	14	0.2	1	1	0	2	1	11485	2297	13782	0	1	0.2	virus-like	NA	0	2	0	0	0	Low-quality	13.11	AAI-based (medium-confidence)	no viral genes detected; high kmer_freq may indicate large duplication
Capsule1_23231411	215805	2834	16	4	4	13477	11877	33.72	0	11	18	0	0	0	0	0	0	0	0	0	6	0	3	6	6	9	0.333333	3	1	0	4	1	11472	2005	13477	0	1	0.333333	virus-like	NA	0	3	0	0	0	Low-quality	44.85	AAI-based (medium-confidence)	NA
Capsule1_21020607	437720	2564	9	3	3	11450	10250	47.27	0	11	15	0	0	0	0	0	0	0	0	0	6	0	3	6	6	6	0.4	3	0	0	3	1	11450	0	11450	0	1	0.4	virus-like	NA	0	4	0	0	0	Low-quality	49.88	AAI-based (high-confidence)	NA
Capsule1_21050707	134679	3659	20	6	6	15311	12911	54.02	0	11	17	0	0	0	0	0	0	0	0	0	3	0	1	3	3	13	0.176471	3	2	1	5	0.833333	11448	2701	14149	1162	0.924107	0.190963	virus-like	NA	0	3	0	0	0	Low-quality	27.19	AAI-based (medium-confidence)	NA
Capsule1_15151415	49540	3122	21	6	6	13766	11366	45.3	0	11	24	0	0	0	0	0	0	0	0	2	3	0	1	5	5	18	0.208333	5	1	0	6	1	11369	2397	13766	0	1	0.208333	virus-like	NA	0	2	0	0	2	Low-quality	31.52	AAI-based (medium-confidence)	NA
Capsule1_02141603	164777	2710	10	5	5	11360	9360	37.37	0	11	24	0	0	0	0	0	0	0	0	1	5	0	3	6	6	15	0.25	5	0	0	5	1	11360	0	11360	0	1	0.25	virus-like	NA	0	4	0	0	0	Low-quality	35.75	AAI-based (high-confidence)	NA
Capsule1_16232012	47755	4978	8	5	5	26387	24387	35.8	0	11	41	0	0	0	0	0	0	0	0	9	8	0	5	17	17	19	0.414634	3	2	0	5	1	11330	7327	18657	0	0.707053	0.586426	virus-like	NA	0	8	1	0	0	Low-quality	20.47	HMM-based (lower-bound)	NA
Capsule1_19021214	5164	2214	7	5	5	16442	14442	49.11	0	11	19	0	0	0	0	0	0	0	0	0	6	0	2	6	6	11	0.315789	3	1	1	4	0.8	11306	3556	14862	1580	0.903905	0.349361	virus-like	NA	0	4	1	0	0	Low-quality	36.45	AAI-based (high-confidence)	NA
Capsule1_16190813	143261	3325	4	2	2	15423	14623	36.29	0	11	28	0	0	0	0	0	0	0	0	0	5	0	2	5	5	21	0.178571	1	1	0	2	1	11248	4175	15423	0	1	0.178571	virus-like	NA	0	1	0	0	0	Low-quality	39.35	AAI-based (high-confidence)	NA
Capsule1_05160012	88221	1738	9	5	5	11242	9242	40.03	0	11	15	0	0	0	0	0	0	0	0	1	0	0	2	1	1	12	0.0666667	5	0	0	5	1	11242	0	11242	0	1	0.0666667	virus-like	NA	0	3	0	0	0	Low-quality	41.3	AAI-based (medium-confidence)	NA
Capsule1_17192022	19251	2373	13	4	4	19367	17767	46.5	0	11	19	0	0	0	0	0	0	0	0	0	5	1	2	5	6	11	0.315789	2	2	0	4	1	11228	8139	19367	0	1	0.315789	virus-like	NA	0	1	2	0	0	Medium-quality	53.64	AAI-based (medium-confidence)	NA
Capsule1_17051422	147022	3403	6	3	3	14025	12825	45.32	0	11	29	0	0	0	0	0	0	0	0	0	9	0	6	9	9	14	0.310345	2	1	0	3	1	11227	2798	14025	0	1	0.310345	virus-like	NA	0	2	1	4	0	Low-quality	42.93	AAI-based (high-confidence)	NA
Capsule1_00112016	4143	2033	42	4	4	15757	14157	35.3	0	11	19	0	0	0	0	0	0	0	0	0	1	2	6	1	3	10	0.157895	3	1	0	4	1	11224	4533	15757	0	1	0.157895	virus-like	NA	0	3	0	0	0	Low-quality	30.36	AAI-based (high-confidence)	NA
Capsule1_09050918	5572	2427	46	8	8	20348	17148	33.02	0	11	15	0	0	0	0	0	0	0	0	0	0	0	0	0	0	0	0	2	4	2	6	0.75	11202	7088	18290	2058	0.89886	0	virus-like	NA	0	1	0	0	0	Low-quality	21.15	AAI-based (high-confidence)	NA
Capsule1_15100200	85683	2941	13	4	4	14775	13175	55.89	0	11	28	0	0	0	0	0	0	0	0	0	10	1	4	10	11	13	0.392857	3	1	0	4	1	11161	3614	14775	0	1	0.392857	virus-like	NA	1	2	1	2	0	Low-quality	40.57	AAI-based (medium-confidence)	NA
Capsule1_17181203	264214	5997	17	9	9	31211	27611	43.96	0	11	48	0	0	0	0	0	0	0	0	0	4	0	3	4	4	41	0.0833333	2	7	0	9	1	11157	20054	31211	0	1	0.0833333	virus-like	NA	1	1	1	0	0	Low-quality	24.62	HMM-based (lower-bound)	NA
Capsule1_19161618	110341	3992	24	6	6	20843	18443	32.29	0	11	14	0	0	0	0	0	0	0	0	0	0	0	0	0	0	0	0	2	4	0	6	1	11127	9716	20843	0	1	0	virus-like	NA	0	1	0	0	0	Low-quality	22.61	AAI-based (medium-confidence)	NA
Capsule1_15001118	6328	1226	4	2	2	11119	10319	34.1	0	11	22	0	0	0	0	0	0	0	0	0	2	0	2	2	2	18	0.0909091	2	0	0	2	1	11119	0	11119	0	1	0.0909091	virus-like	NA	0	2	0	0	0	Low-quality	32.96	AAI-based (high-confidence)	high kmer_freq may indicate large duplication
Capsule1_03172301	21405	4218	12	3	3	25717	24517	47.16	0	11	27	0	0	0	0	0	0	0	0	0	7	1	0	7	8	19	0.296296	2	1	0	3	1	11106	14611	25717	0	1	0.296296	virus-like	NA	0	1	2	1	1	Low-quality	43.96	AAI-based (high-confidence)	NA
Capsule1_15021118	8048	1259	3	2	2	11093	10293	34.1	0	11	22	0	0	0	0	0	0	0	0	0	2	0	2	2	2	18	0.0909091	2	0	0	2	1	11093	0	11093	0	1	0.0909091	virus-like	NA	0	2	0	0	0	Low-quality	32.88	AAI-based (high-confidence)	high kmer_freq may indicate large duplication
Capsule1_15050315	102413	2092	8	2	2	11051	10251	32.07	0	11	17	0	0	0	0	0	0	0	0	0	3	0	5	3	3	9	0.176471	2	0	0	2	1	11051	0	11051	0	1	0.176471	virus-like	NA	0	2	0	0	0	Low-quality	34.35	AAI-based (high-confidence)	NA
Capsule1_09131403	372062	3336	10	7	7	16848	14048	31.22	0	11	22	0	0	0	0	0	0	0	0	0	5	2	1	5	7	14	0.318182	4	2	1	6	0.857143	11047	4234	15281	1567	0.906992	0.35081	virus-like	NA	0	1	0	0	0	Medium-quality	55.53	AAI-based (high-confidence)	NA
Capsule1_04230903	336229	3051	12	3	3	12140	10940	37.81	0	11	21	0	0	0	0	0	0	0	0	0	7	0	4	7	7	10	0.333333	2	1	0	3	1	11043	1097	12140	0	1	0.333333	virus-like	NA	1	2	0	0	1	Low-quality	32.71	AAI-based (high-confidence)	NA
Capsule1_17080006	121565	2465	9	3	3	11015	9815	31.3	0	11	15	0	0	0	0	0	0	0	0	0	4	1	5	4	5	5	0.333333	3	0	0	3	1	11015	0	11015	0	1	0.333333	virus-like	NA	0	6	1	1	0	Low-quality	34.32	AAI-based (high-confidence)	NA
Capsule1_06152203	354577	2883	6	3	3	12117	10917	46.27	0	11	19	0	0	0	0	0	0	0	0	0	2	1	4	2	3	12	0.157895	2	0	1	2	0.666667	10997	0	10997	1120	0.907568	0.173976	virus-like	NA	0	6	0	0	0	Medium-quality	67.96	AAI-based (high-confidence)	NA
Capsule1_03171515	151487	4142	27	7	7	21336	18536	56.15	0	11	41	0	0	0	0	0	0	0	0	0	4	0	0	4	4	37	0.097561	3	2	2	5	0.714286	10996	2676	13672	7664	0.640795	0.15225	virus-like	NA	0	1	0	0	0	Low-quality	13.57	HMM-based (lower-bound)	NA
Capsule1_05092003	5890	2689	93	6	6	13093	10693	40.81	0	11	20	0	0	0	0	0	0	0	0	0	5	0	3	5	5	12	0.25	4	2	0	6	1	10995	2098	13093	0	1	0.25	virus-like	NA	0	4	0	0	0	Low-quality	16.78	HMM-based (lower-bound)	NA
Capsule1_09042015	223810	2448	4	3	3	13652	12452	34.69	0	11	22	0	0	0	0	0	0	0	0	0	3	0	1	3	3	18	0.136364	2	1	0	3	1	10951	2701	13652	0	1	0.136364	virus-like	NA	0	0	0	0	0	Low-quality	36.65	AAI-based (medium-confidence)	NA
Capsule1_15222209	470014	3069	11	3	3	13764	12564	45.72	0	11	20	0	0	0	0	0	0	0	0	0	2	1	2	2	3	15	0.15	3	0	0	3	1	10920	0	10920	0	0.793374	0.189066	virus-like	NA	0	2	1	0	0	Low-quality	21.69	HMM-based (lower-bound)	NA
Capsule1_00060323	158442	1604	3	2	2	10879	10079	35.75	0	11	10	0	0	0	0	0	0	0	0	0	0	0	8	0	0	2	0	2	0	0	2	1	10879	0	10879	0	1	0	virus-like	NA	0	6	0	0	0	Low-quality	24.49	AAI-based (medium-confidence)	high kmer_freq may indicate large duplication
Capsule1_05020505	175753	3588	19	5	5	16345	14345	34.16	0	11	20	0	0	0	0	0	0	0	0	0	4	1	1	4	5	14	0.25	2	3	0	5	1	10877	5468	16345	0	1	0.25	virus-like	NA	0	2	0	0	0	Medium-quality	56.91	AAI-based (medium-confidence)	NA
Capsule1_04231419	71286	3121	11	3	3	14414	13214	43.85	0	11	26	0	0	0	0	0	0	0	0	0	4	0	1	4	4	21	0.153846	1	2	0	3	1	10859	3555	14414	0	1	0.153846	virus-like	NA	0	1	0	0	0	Low-quality	37.9	AAI-based (medium-confidence)	NA
Capsule1_09060212	119019	3028	7	4	4	14123	12523	33.47	0	11	12	0	0	0	0	0	0	0	0	0	1	1	2	1	2	8	0.166667	3	1	0	4	1	10845	3278	14123	0	1	0.166667	virus-like	NA	0	2	0	0	0	Low-quality	31.93	AAI-based (high-confidence)	NA
Capsule1_09140221	3178	1620	52	6	6	14692	12292	32.9	0	11	18	0	0	0	0	0	0	0	0	0	5	0	0	5	5	13	0.277778	4	2	0	6	1	10845	3847	14692	0	1	0.277778	virus-like	NA	0	1	0	0	0	Low-quality	14.34	HMM-based (lower-bound)	NA
Capsule1_13120907	565433	6220	25	8	8	28163	24963	39.63	0	11	50	0	0	0	0	0	0	0	0	1	11	1	2	12	13	35	0.26	3	5	0	8	1	10794	17369	28163	0	1	0.26	virus-like	NA	0	1	2	1	0	Low-quality	30.31	HMM-based (lower-bound)	NA
Capsule1_20010409	241824	3236	4	2	2	22416	21616	34.65	0	11	23	0	0	0	0	0	0	0	0	0	9	0	3	9	9	11	0.391304	1	1	0	2	1	10773	11643	22416	0	1	0.391304	virus-like	NA	0	5	0	0	0	Medium-quality	62	AAI-based (high-confidence)	NA
Capsule1_06190909	4060	1864	37	6	6	15645	13245	36.98	0	11	24	0	0	0	0	0	0	0	0	0	2	0	4	2	2	18	0.0833333	4	2	0	6	1	10747	4898	15645	0	1	0.0833333	virus-like	NA	0	0	0	0	0	Low-quality	29.7	AAI-based (high-confidence)	NA
Capsule1_02111817	274250	3274	13	3	3	12950	11750	32.7	0	11	14	0	0	0	0	0	0	0	0	0	2	0	3	2	2	9	0.142857	2	0	1	2	0.666667	10746	0	10746	2204	0.829807	0.172157	virus-like	NA	0	3	0	0	0	Low-quality	6.64	HMM-based (lower-bound)	NA
Capsule1_09040904	124133	4232	15	4	4	20790	19190	32.05	0	11	12	0	0	0	0	0	0	0	0	0	1	0	1	1	1	10	0.0833333	2	2	0	4	1	10736	10054	20790	0	1	0.0833333	virus-like	NA	0	2	0	0	0	Low-quality	31.42	AAI-based (medium-confidence)	NA
Capsule1_13060023	19436	1453	6	3	3	11758	10558	38.23	0	11	18	0	0	0	0	0	0	0	0	0	1	0	8	1	1	9	0.0555556	2	1	0	3	1	10728	1030	11758	0	1	0.0555556	virus-like	NA	0	2	0	0	0	Low-quality	21.93	AAI-based (high-confidence)	high kmer_freq may indicate large duplication
Capsule1_14220317	45992	1942	7	3	3	10727	9527	39.48	0	11	12	0	0	0	0	0	0	0	0	0	2	1	2	2	3	7	0.25	3	0	0	3	1	10727	0	10727	0	1	0.25	virus-like	NA	0	2	0	0	0	Low-quality	32.66	AAI-based (medium-confidence)	NA
Capsule1_05140318	96843	3226	13	5	5	16147	14147	32.04	0	11	23	0	0	0	0	0	0	0	0	0	2	1	1	2	3	19	0.130435	3	1	1	4	0.8	10703	4388	15091	1056	0.934601	0.139562	virus-like	NA	0	3	0	0	0	Low-quality	27.65	AAI-based (high-confidence)	NA
Capsule1_14110022	58825	2692	29	8	8	15247	12047	54.63	0	11	21	0	0	0	0	0	0	0	0	0	3	0	2	3	3	16	0.142857	4	3	1	7	0.875	10670	3572	14242	1005	0.934085	0.152938	virus-like	NA	0	3	0	1	0	Low-quality	28.96	AAI-based (medium-confidence)	NA
Capsule1_15151119	71319	2538	8	2	2	10667	9867	34.36	0	11	17	0	0	0	0	0	0	0	0	0	2	0	2	2	2	13	0.117647	2	0	0	2	1	10667	0	10667	0	1	0.117647	virus-like	NA	0	3	0	0	0	Low-quality	42.06	AAI-based (medium-confidence)	NA
Capsule1_09050010	201541	4539	24	7	7	20131	17331	45.03	0	11	36	0	0	0	0	0	0	0	0	1	5	0	5	6	6	25	0.166667	3	1	3	4	0.571429	10665	3418	14083	4931	0.699568	0.238242	virus-like	NA	0	2	0	1	0	Low-quality	37.1	AAI-based (medium-confidence)	NA
Capsule1_15202215	155473	2698	19	5	5	12256	10256	33.38	0	11	14	0	0	0	0	0	0	0	0	0	0	0	3	0	0	11	0	4	1	0	5	1	10621	1070	11691	0	0.9539	0	virus-like	NA	0	4	0	0	0	Low-quality	34.94	AAI-based (high-confidence)	NA
Capsule1_07072110	131015	2510	7	1	1	10605	10205	50.46	0	11	10	0	0	0	0	0	0	0	0	0	0	0	1	0	0	9	0	1	0	0	1	1	10605	0	10605	0	1	0	virus-like	NA	0	0	0	0	0	Low-quality	25.26	AAI-based (medium-confidence)	no viral genes detected; low-confidence ITR
Capsule1_21220913	398741	3336	16	5	5	12776	10776	42.61	0	11	15	0	0	0	0	0	0	0	0	0	3	1	6	3	4	5	0.266667	4	1	0	5	1	10566	2210	12776	0	1	0.266667	virus-like	NA	0	7	0	0	0	Low-quality	31.44	AAI-based (high-confidence)	NA
Capsule1_06100816	39219	2100	10	4	4	10559	8959	42.47	0	11	18	0	0	0	0	0	0	0	0	0	3	0	4	3	3	11	0.166667	4	0	0	4	1	10559	0	10559	0	1	0.166667	virus-like	NA	1	2	0	2	0	Low-quality	32.69	AAI-based (high-confidence)	NA
Capsule1_06050809	244282	2274	7	1	1	10555	10155	50.8	0	11	18	0	0	0	0	0	0	0	0	0	10	0	2	10	10	6	0.555556	1	0	0	1	1	10555	0	10555	0	1	0.555556	virus-like	NA	0	8	0	0	0	Low-quality	28.74	AAI-based (high-confidence)	NA
Capsule1_02082304	61615	3092	5	3	3	24523	23323	36.86	0	11	29	0	0	0	0	0	0	0	0	0	0	0	21	0	0	8	0	1	1	1	2	0.666667	10551	12930	23481	1042	0.957509	0	virus-like	NA	0	11	8	0	0	Low-quality	13.09	AAI-based (high-confidence)	NA
Capsule1_03171104	65979	3529	12	3	3	16888	15688	43.88	0	11	30	0	0	0	0	0	0	0	0	0	8	0	3	8	8	19	0.266667	2	1	0	3	1	10507	6381	16888	0	1	0.266667	virus-like	NA	0	4	1	0	0	Medium-quality	50.32	AAI-based (high-confidence)	NA
Capsule1_19222205	75084	2199	2	1	1	10421	10021	37.08	0	11	17	0	0	0	0	0	0	0	0	0	3	0	1	3	3	13	0.176471	1	0	0	1	1	10421	0	10421	0	1	0.176471	virus-like	NA	0	2	0	0	0	Low-quality	17.51	AAI-based (high-confidence)	NA
Capsule1_16161206	39485	2101	2	1	1	10405	10005	35.06	0	11	16	0	0	0	0	0	0	0	0	0	1	1	1	1	2	13	0.125	1	0	0	1	1	10405	0	10405	0	1	0.125	virus-like	NA	2	0	0	0	0	Low-quality	3.5	HMM-based (lower-bound)	NA
Capsule1_03061007	251963	4202	14	4	4	19612	18012	35.45	0	11	25	0	0	0	0	0	0	0	0	0	2	0	2	2	2	21	0.08	3	1	0	4	1	10397	9215	19612	0	1	0.08	virus-like	NA	0	0	0	0	0	Low-quality	35.96	AAI-based (medium-confidence)	NA
Capsule1_20051223	143294	2543	16	5	5	11815	9815	34.22	0	11	23	0	0	0	0	0	0	0	0	0	7	0	3	7	7	13	0.304348	4	1	0	5	1	10382	1433	11815	0	1	0.304348	virus-like	NA	0	1	1	2	0	Low-quality	23.76	AAI-based (medium-confidence)	NA
Capsule1_11141304	117222	3568	15	5	5	14078	12078	31.85	0	11	13	0	0	0	0	0	0	0	0	0	5	0	4	5	5	4	0.384615	3	2	0	5	1	10349	3729	14078	0	1	0.384615	virus-like	NA	0	5	0	0	0	Low-quality	39.77	AAI-based (high-confidence)	NA
Capsule1_03162005	7816	1155	2	1	1	10308	9908	29.93	0	11	24	0	0	0	0	0	0	0	0	0	0	0	4	0	0	20	0	1	0	0	1	1	10308	0	10308	0	1	0	virus-like	NA	0	0	2	0	4	Low-quality	33.11	AAI-based (high-confidence)	high kmer_freq may indicate large duplication; low-confidence ITR
Capsule1_17151917	191594	2567	7	2	2	10237	9437	45.42	0	11	17	0	0	0	0	0	0	0	0	0	2	0	4	2	2	11	0.117647	2	0	0	2	1	10237	0	10237	0	1	0.117647	virus-like	NA	0	4	0	0	0	Low-quality	28.11	AAI-based (high-confidence)	NA
Capsule1_12082318	136802	3166	6	3	3	14385	13185	32.82	0	11	17	0	0	0	0	0	0	0	0	0	5	0	1	5	5	11	0.294118	1	2	0	3	1	10233	4152	14385	0	1	0.294118	virus-like	NA	0	3	0	0	0	Low-quality	41.74	AAI-based (high-confidence)	NA
Capsule1_04111919	74124	4424	14	6	6	19893	17493	36.93	0	11	29	0	0	0	0	0	0	0	0	0	3	0	10	3	3	16	0.103448	2	4	0	6	1	10209	9684	19893	0	1	0.103448	virus-like	NA	0	4	1	0	0	Medium-quality	54.1	AAI-based (high-confidence)	NA
Capsule1_05171506	331199	2437	4	1	1	10206	9806	44.18	0	11	21	0	0	0	0	0	0	0	0	0	11	0	2	11	11	8	0.52381	1	0	0	1	1	10206	0	10206	0	1	0.52381	virus-like	NA	0	3	1	1	0	Low-quality	25.48	AAI-based (medium-confidence)	NA
Capsule1_08200421	3146	1495	56	5	5	11509	9509	53.16	0	11	24	0	0	0	0	0	0	0	0	0	3	1	4	3	4	16	0.166667	4	1	0	5	1	10204	1305	11509	0	1	0.166667	virus-like	NA	0	1	0	0	0	Low-quality	26.44	AAI-based (medium-confidence)	NA
Capsule1_18171214	207584	2453	6	3	3	10157	8957	48.21	0	11	20	0	0	0	0	0	0	0	0	0	5	0	1	5	5	14	0.25	3	0	0	3	1	10157	0	10157	0	1	0.25	virus-like	NA	0	2	0	0	0	Medium-quality	68.79	AAI-based (high-confidence)	NA
Capsule1_15110018	2691	1453	13	3	3	11219	10019	35.7	0	11	12	0	0	0	0	0	0	0	0	0	2	2	2	2	4	6	0.333333	2	1	0	3	1	10151	1068	11219	0	1	0.333333	virus-like	NA	0	4	0	0	1	Low-quality	17.43	AAI-based (medium-confidence)	NA
Capsule1_07141518	122333	2516	11	2	2	10080	9280	31.7	0	11	7	0	0	0	0	0	0	0	0	1	2	0	0	3	3	4	0.428571	2	0	0	2	1	10080	0	10080	0	1	0.428571	virus-like	NA	0	0	0	0	0	Low-quality	2.48	HMM-based (lower-bound)	NA
Capsule1_02210016	53166	2352	8	6	6	11080	8680	33.91	0	11	15	0	0	0	0	0	0	0	0	0	7	0	1	7	7	7	0.466667	5	1	0	6	1	10025	1055	11080	0	1	0.466667	virus-like	NA	0	3	0	0	0	Low-quality	38.62	AAI-based (high-confidence)	NA
Capsule1_03010307	302458	4607	29	9	9	21936	18336	35.19	0	11	23	0	0	0	0	0	0	0	0	0	1	2	1	1	3	19	0.130435	4	5	0	9	1	9979	11957	21936	0	1	0.130435	virus-like	NA	0	5	0	0	0	Low-quality	22.56	AAI-based (medium-confidence)	NA
Capsule1_16231021	32689	1233	8	1	1	9975	9575	33.13	0	11	10	0	0	0	0	0	0	0	0	0	2	0	0	2	2	8	0.2	1	0	0	1	1	9975	0	9975	0	1	0.2	virus-like	NA	0	0	0	0	0	Low-quality	5.87	AAI-based (medium-confidence)	no viral genes detected; high kmer_freq may indicate large duplication; low-confidence ITR
Capsule1_06210015	73180	2017	2	2	2	9949	9149	33.35	0	11	14	0	0	0	0	0	0	0	0	0	2	0	1	2	2	11	0.142857	2	0	0	2	1	9949	0	9949	0	1	0.142857	virus-like	NA	0	1	0	0	0	Low-quality	16.63	AAI-based (medium-confidence)	NA
Capsule1_11110404	116262	2466	11	2	2	9931	9131	44.66	0	11	17	0	0	0	0	0	0	0	0	0	2	1	2	2	3	12	0.176471	2	0	0	2	1	9931	0	9931	0	1	0.176471	virus-like	NA	0	2	1	0	0	Low-quality	29.39	AAI-based (high-confidence)	NA
Capsule1_00100722	7157	2832	79	13	13	26363	21163	34.02	0	11	31	0	0	0	0	0	0	0	0	1	1	2	3	2	4	24	0.129032	4	8	1	12	0.923077	9923	14887	24810	1553	0.941092	0.137109	virus-like	NA	0	2	1	0	0	Low-quality	8.54	AAI-based (high-confidence)	NA
Capsule1_04051211	97392	2901	11	4	4	15679	14079	65.21	0	11	31	0	0	0	0	0	0	0	0	0	4	1	1	4	5	25	0.16129	2	1	1	3	0.75	9917	2171	12088	3591	0.770968	0.209205	virus-like	NA	1	1	1	0	0	Low-quality	11.17	HMM-based (lower-bound)	NA
Capsule1_03071913	452318	5631	17	6	6	26744	24344	40.98	0	11	38	0	0	0	0	0	0	0	0	0	4	2	3	4	6	29	0.157895	3	2	1	5	0.833333	9905	15423	25328	1416	0.947054	0.166722	virus-like	NA	0	2	0	1	0	Medium-quality	57.8	AAI-based (high-confidence)	NA
Capsule1_13110814	162145	4110	24	6	6	17413	15013	41.05	0	11	22	0	0	0	0	0	0	0	0	0	7	0	2	7	7	13	0.318182	2	4	0	6	1	9901	7512	17413	0	1	0.318182	virus-like	NA	1	1	2	1	0	Low-quality	27.84	AAI-based (high-confidence)	NA
Capsule1_14092114	79527	3422	16	4	4	17814	16214	52.66	0	11	29	0	0	0	0	0	0	0	0	1	8	0	3	9	9	17	0.310345	2	2	0	4	1	9843	7971	17814	0	1	0.310345	virus-like	NA	0	5	1	1	0	Medium-quality	53.67	AAI-based (medium-confidence)	NA
Capsule1_02161115	37548	3167	29	7	7	11669	8869	35.8	0	11	18	0	0	0	0	0	0	0	0	0	3	0	4	3	3	11	0.166667	6	1	0	7	1	9841	1828	11669	0	1	0.166667	virus-like	NA	0	3	0	0	0	Low-quality	21.88	AAI-based (medium-confidence)	NA
Capsule1_06162103	294332	3972	10	4	4	20252	18652	46.73	0	11	28	0	0	0	0	0	0	0	0	0	6	1	3	6	7	18	0.25	2	2	0	4	1	9808	10444	20252	0	1	0.25	virus-like	NA	1	1	1	0	0	Low-quality	45.11	AAI-based (medium-confidence)	low-confidence DTR
Capsule1_13080620	293292	9606	63	12	12	51214	46414	50.34	0.65	11	50	0	0	0	0	0	0	0	0	0	4	7	12	4	11	27	0.22	2	9	1	11	0.916667	9731	40282	50013	1201	0.976549	0.225283	virus-like	NA	0	2	2	0	0	Low-quality	26.88	AAI-based (medium-confidence)	NA
Capsule1_05231920	122650	2780	10	4	4	11117	9517	42.54	0	11	18	0	0	0	0	0	0	0	0	0	5	0	2	5	5	11	0.277778	3	1	0	4	1	9707	1410	11117	0	1	0.277778	virus-like	NA	1	4	1	1	0	Low-quality	35.86	AAI-based (high-confidence)	NA
Capsule1_13211512	60539	3435	14	7	7	19958	17158	56.01	0	11	31	0	0	0	0	0	0	0	0	0	3	0	3	3	3	25	0.0967742	3	4	0	7	1	9703	10255	19958	0	1	0.0967742	virus-like	NA	0	2	2	0	1	Low-quality	22.61	HMM-based (lower-bound)	NA
Capsule1_11050802	4916	2528	59	7	7	13757	10957	44.82	0	11	16	0	0	0	0	0	0	0	0	0	5	0	3	5	5	8	0.3125	4	3	0	7	1	9659	4098	13757	0	1	0.3125	virus-like	NA	0	3	0	0	0	Low-quality	41.01	AAI-based (high-confidence)	NA
Capsule1_08052120	110044	2865	15	2	2	12294	11494	34.62	0	11	13	0	0	0	0	0	0	0	0	0	7	0	3	7	7	3	0.538462	1	1	0	2	1	9585	2709	12294	0	1	0.538462	virus-like	NA	0	4	0	0	0	Low-quality	35.42	AAI-based (high-confidence)	NA
Capsule1_22092203	25434	2555	12	5	5	11891	9891	37.35	0	11	15	0	0	0	0	0	0	0	0	0	2	1	8	2	3	4	0.2	3	2	0	5	1	9556	2335	11891	0	1	0.2	virus-like	NA	0	6	0	0	0	Low-quality	22.89	AAI-based (high-confidence)	NA
Capsule1_03050716	215412	2592	6	2	2	15734	14934	31.98	0	11	23	0	0	0	0	0	0	0	0	0	1	0	4	1	1	18	0.0434783	1	1	0	2	1	9552	6182	15734	0	1	0.0434783	virus-like	NA	0	0	0	2	0	Low-quality	11.48	HMM-based (lower-bound)	NA
Capsule1_17101504	40786	2394	9	3	3	10602	9402	64.92	0	11	14	0	0	0	0	0	0	0	0	1	5	0	0	6	6	8	0.428571	2	1	0	3	1	9552	1050	10602	0	1	0.428571	virus-like	NA	1	1	1	0	1	Low-quality	25.32	AAI-based (medium-confidence)	no viral genes detected
Capsule1_00111612	193526	2959	10	3	3	14434	13234	46.86	0	11	16	0	0	0	0	0	0	0	0	0	2	0	1	2	2	13	0.125	2	1	0	3	1	9548	4886	14434	0	1	0.125	virus-like	NA	0	2	0	0	0	Low-quality	31.08	HMM-based (lower-bound)	NA
Capsule1_02230200	116894	2146	4	3	3	9547	8347	39.45	0	11	19	0	0	0	0	0	0	0	0	0	1	0	4	1	1	14	0.0526316	3	0	0	3	1	9547	0	9547	0	1	0.0526316	virus-like	NA	0	5	0	0	0	Medium-quality	52.61	AAI-based (high-confidence)	NA
Capsule1_02130023	99448	3284	13	7	7	18778	15978	54.01	0	11	36	0	0	0	0	0	0	0	0	0	12	0	4	12	12	20	0.333333	3	4	0	7	1	9529	9249	18778	0	1	0.333333	virus-like	NA	0	4	1	1	0	Low-quality	49.81	AAI-based (high-confidence)	NA
Capsule1_12200403	236752	5484	27	8	8	24755	21555	47.77	0	11	22	0	0	0	0	0	0	0	0	1	9	0	2	10	10	10	0.454545	3	2	3	5	0.625	9520	5380	14900	9855	0.601899	0.755186	virus-like	NA	1	2	0	0	2	Low-quality	21.33	HMM-based (lower-bound)	NA
Capsule1_02220904	63490	2439	13	5	5	13390	11390	26.8	0	11	16	0	0	0	0	0	0	0	0	0	5	0	1	5	5	10	0.3125	3	2	0	5	1	9478	3912	13390	0	1	0.3125	virus-like	NA	0	3	0	0	1	Low-quality	41.92	AAI-based (medium-confidence)	NA
Capsule1_11232203	61018	2687	8	4	4	11324	9724	33.03	0	11	18	0	0	0	0	0	0	0	0	0	5	0	2	5	5	11	0.277778	3	1	0	4	1	9470	1854	11324	0	1	0.277778	virus-like	NA	0	3	0	0	0	Low-quality	37.52	AAI-based (high-confidence)	NA
Capsule1_19170216	88492	2003	5	2	2	9468	8668	33.61	0	11	14	0	0	0	0	0	0	0	0	0	3	0	3	3	3	8	0.214286	2	0	0	2	1	9468	0	9468	0	1	0.214286	virus-like	NA	0	4	0	0	0	Low-quality	23.34	AAI-based (high-confidence)	NA
Capsule1_22080521	122969	2429	13	4	4	10545	8945	27.84	0	11	19	0	0	0	0	0	0	0	0	0	5	1	1	5	6	12	0.315789	3	1	0	4	1	9466	1079	10545	0	1	0.315789	virus-like	NA	0	0	1	1	1	Low-quality	34.13	AAI-based (high-confidence)	NA
Capsule1_09071315	3240	1116	2	2	2	9423	8623	42.07	0	11	20	0	0	0	0	0	0	0	0	0	3	0	6	3	3	11	0.15	2	0	0	2	1	9423	0	9423	0	1	0.15	virus-like	NA	0	2	0	0	2	Low-quality	16.03	AAI-based (high-confidence)	NA
Capsule1_02112016	3517	1729	63	6	6	11676	9276	36.63	0	11	21	0	0	0	0	0	0	0	0	0	1	2	6	1	3	12	0.142857	4	2	0	6	1	9402	2274	11676	0	1	0.142857	virus-like	NA	0	2	0	0	0	Low-quality	22.19	AAI-based (high-confidence)	NA
Capsule1_00191303	3277	1706	5	3	3	11289	10089	34.56	0	11	15	0	0	0	0	0	0	0	0	0	3	0	2	3	3	10	0.2	2	1	0	3	1	9369	1920	11289	0	1	0.2	virus-like	NA	0	2	0	0	0	Low-quality	35.04	AAI-based (high-confidence)	NA
Capsule1_06171220	111830	2722	25	6	6	18624	16224	36.25	0	11	37	0	0	0	0	0	0	0	0	0	10	0	1	10	10	26	0.27027	1	4	1	5	0.833333	9341	8176	17517	1107	0.940561	0.28735	virus-like	NA	0	0	0	0	0	Low-quality	10.58	AAI-based (medium-confidence)	high kmer_freq may indicate large duplication
Capsule1_08161204	143817	2987	19	3	3	12374	11174	49.18	0	11	16	0	0	0	0	0	0	0	0	0	2	0	1	2	2	13	0.125	1	2	0	3	1	9295	3079	12374	0	1	0.125	virus-like	NA	0	4	0	0	0	Low-quality	37.58	AAI-based (high-confidence)	NA
Capsule1_13230003	2891	1194	47	3	3	9262	8062	39.94	0	11	11	0	0	0	0	0	0	0	0	0	1	0	5	1	1	5	0.0909091	3	0	0	3	1	9262	0	9262	0	1	0.0909091	virus-like	NA	0	2	0	0	0	Low-quality	4.85	HMM-based (lower-bound)	NA
Capsule1_02001806	114436	2147	5	2	2	9217	8417	36.41	0	11	11	0	0	0	0	0	0	0	0	0	3	0	3	3	3	5	0.272727	2	0	0	2	1	9217	0	9217	0	1	0.272727	virus-like	NA	0	1	0	0	0	Low-quality	24.97	AAI-based (high-confidence)	NA
Capsule1_06110018	2620	1343	13	5	5	14899	12899	35.89	0	11	13	0	0	0	0	0	0	0	0	0	2	2	0	2	4	9	0.307692	2	3	0	5	1	9200	5699	14899	0	1	0.307692	virus-like	NA	0	5	0	0	0	Low-quality	24.3	AAI-based (medium-confidence)	NA
Capsule1_15020804	157962	2383	12	3	3	9165	7965	31.51	0	11	12	0	0	0	0	0	0	0	0	0	4	0	0	4	4	8	0.333333	3	0	0	3	1	9165	0	9165	0	1	0.333333	virus-like	NA	0	2	1	0	0	Low-quality	28.54	AAI-based (medium-confidence)	NA
Capsule1_09202121	4858	2299	94	11	11	21425	17025	46.74	0	11	31	0	0	0	0	0	0	0	0	1	1	0	4	2	2	25	0.0645161	4	7	0	11	1	9133	12292	21425	0	1	0.0645161	virus-like	NA	0	3	0	0	0	Low-quality	31.07	HMM-based (lower-bound)	NA
Capsule1_18040617	212484	2652	8	4	4	13678	12078	50.96	0	11	20	0	0	0	0	0	0	0	0	0	2	0	3	2	2	15	0.1	1	2	1	3	0.75	9126	2688	11814	1864	0.863723	0.115778	virus-like	NA	1	3	0	0	0	Low-quality	31	AAI-based (medium-confidence)	NA
Capsule1_06191918	3336	1712	54	5	5	12291	10291	36.67	0	11	15	0	0	0	0	0	0	0	0	0	4	0	3	4	4	8	0.266667	3	2	0	5	1	9087	3204	12291	0	1	0.266667	virus-like	NA	0	3	0	0	0	Low-quality	20.5	AAI-based (high-confidence)	NA
Capsule1_09080716	121827	2741	10	4	4	17089	15489	41.91	0	11	32	0	0	0	0	0	0	0	0	0	7	1	6	7	8	18	0.25	2	2	0	4	1	9034	8055	17089	0	1	0.25	virus-like	NA	1	1	1	1	0	Low-quality	43.34	AAI-based (medium-confidence)	NA
Capsule1_04152200	79810	2196	7	5	5	12073	10073	39.39	0	1	15	0	0	0	0	0	0	0	0	1	0	1	6	1	2	7	0.133333	3	2	0	5	1	9026	3047	12073	0	1	0.133333	virus-like	NA	0	7	1	0	0	Low-quality	27.74	AAI-based (high-confidence)	NA
Capsule1_20231103	491532	2839	9	4	4	19596	17996	36.77	0	11	22	0	0	0	0	0	0	0	0	0	1	1	1	1	2	19	0.0909091	2	2	0	4	1	8946	10650	19596	0	1	0.0909091	virus-like	NA	0	0	0	0	0	Low-quality	5.47	HMM-based (lower-bound)	low-confidence DTR
Capsule1_03021114	84032	2867	26	3	3	12851	11651	50.78	0	11	15	0	0	0	0	0	0	0	0	0	4	2	5	4	6	4	0.4	1	1	1	2	0.666667	8900	2703	11603	1248	0.902887	0.443023	virus-like	NA	0	2	2	2	0	Low-quality	25.55	AAI-based (high-confidence)	high kmer_freq may indicate large duplication
Capsule1_10110720	401865	3295	13	4	4	13148	11548	41.29	0	11	16	0	0	0	0	0	0	0	0	0	6	0	1	6	6	9	0.375	3	1	0	4	1	8876	4272	13148	0	1	0.375	virus-like	NA	0	3	1	0	0	Low-quality	41.84	AAI-based (medium-confidence)	NA
Capsule1_13032201	11842	1906	9	4	4	10128	8528	42.86	0	11	20	0	0	0	0	0	0	0	0	0	5	0	0	5	5	15	0.25	3	1	0	4	1	8855	1273	10128	0	1	0.25	virus-like	NA	0	1	0	1	0	Low-quality	16.64	HMM-based (lower-bound)	NA
Capsule1_16172316	23064	3687	17	3	3	18681	17481	55.12	0	11	31	0	0	0	0	0	0	0	0	0	5	0	5	5	5	21	0.16129	2	1	0	3	1	8851	9830	18681	0	1	0.16129	virus-like	NA	0	1	1	2	1	Medium-quality	50.3	AAI-based (high-confidence)	NA
Capsule1_08202121	3754	1807	69	8	8	15049	11849	48.14	0	11	19	0	0	0	0	0	0	0	0	1	0	0	3	1	1	15	0.0526316	4	4	0	8	1	8842	6207	15049	0	1	0.0526316	virus-like	NA	0	3	0	0	0	Low-quality	27.98	AAI-based (medium-confidence)	NA
Capsule1_03021222	119622	1515	8	4	4	9822	8222	38.7	0	11	19	0	0	0	0	0	0	0	0	0	3	0	6	3	3	10	0.157895	3	1	0	4	1	8786	1036	9822	0	1	0.157895	virus-like	NA	0	2	0	3	0	Low-quality	31.17	AAI-based (medium-confidence)	high kmer_freq may indicate large duplication
Capsule1_18181209	53312	3836	21	7	7	20166	17366	34.45	0	11	20	0	0	0	0	0	0	0	0	0	2	0	4	2	2	14	0.1	3	2	2	5	0.714286	8768	7992	16760	3406	0.831102	0.120322	virus-like	NA	0	3	0	0	0	Low-quality	25.02	AAI-based (medium-confidence)	NA
Capsule1_21151404	30277	2980	16	7	7	14121	11321	28.2	0	11	19	0	0	0	0	0	0	0	0	2	2	0	2	4	4	13	0.210526	4	3	0	7	1	8757	5364	14121	0	1	0.210526	virus-like	NA	0	2	0	1	0	Low-quality	36.29	AAI-based (medium-confidence)	NA
Capsule1_16232206	60785	3232	20	7	7	18463	15663	54.32	0	11	34	0	0	0	0	0	0	0	0	0	11	0	2	11	11	21	0.323529	2	2	3	4	0.571429	8742	6210	14952	3511	0.809836	0.3995	virus-like	NA	0	2	1	3	0	Low-quality	30.27	AAI-based (medium-confidence)	NA
Capsule1_02222321	2475	1226	17	2	2	8727	7927	42.1	0	11	10	0	0	0	0	0	0	0	0	0	4	0	2	4	4	4	0.4	2	0	0	2	1	8727	0	8727	0	1	0.4	virus-like	NA	0	2	0	0	0	Low-quality	12.67	AAI-based (medium-confidence)	NA
Capsule1_18232207	120366	2250	10	4	4	9767	8167	56.81	0	11	12	0	0	0	0	0	0	0	0	0	2	0	2	2	2	8	0.166667	3	1	0	4	1	8722	1045	9767	0	1	0.166667	virus-like	NA	0	2	0	0	0	Low-quality	25.93	AAI-based (high-confidence)	NA
Capsule1_03160406	182339	2981	20	4	4	10792	9192	42.53	0	11	9	0	0	0	0	0	0	0	0	0	3	0	5	3	3	1	0.333333	2	2	0	4	1	8718	2074	10792	0	1	0.333333	virus-like	NA	0	6	0	0	0	Low-quality	26.53	AAI-based (high-confidence)	NA
Capsule1_15141607	726510	4093	11	4	4	20153	18553	36.76	0	11	23	0	0	0	0	0	0	0	0	1	4	1	8	5	6	9	0.26087	2	2	0	4	1	8701	11452	20153	0	1	0.26087	virus-like	NA	0	7	0	2	0	Medium-quality	54.9	AAI-based (high-confidence)	NA
Capsule1_13080209	108643	2116	5	3	3	12407	11207	31.03	0	11	24	0	0	0	0	0	0	0	0	0	0	0	1	0	0	23	0	2	1	0	3	1	8686	3721	12407	0	1	0	virus-like	NA	0	1	0	0	0	Low-quality	43.95	AAI-based (medium-confidence)	NA
Capsule1_18230609	97790	1938	2	1	1	8679	8279	43.65	0	11	10	0	0	0	0	0	0	0	0	0	2	0	3	2	2	5	0.2	1	0	0	1	1	8679	0	8679	0	1	0.2	virus-like	NA	0	5	0	0	0	Low-quality	19.3	AAI-based (medium-confidence)	NA
Capsule1_17052309	151140	2091	10	3	3	8678	7478	40.73	0	1	10	0	0	0	0	0	0	0	0	0	1	0	0	1	1	9	0.1	3	0	0	3	1	8678	0	8678	0	1	0.1	virus-like	NA	0	0	0	0	0	Low-quality	42.4	AAI-based (medium-confidence)	NA
Capsule1_06130022	122772	2589	7	4	4	15081	13481	44.25	0	11	19	0	0	0	0	0	0	0	0	1	0	1	2	1	2	15	0.105263	3	1	0	4	1	8654	3491	12145	0	0.805318	0.13071	virus-like	NA	0	0	0	1	0	Medium-quality	59.53	AAI-based (high-confidence)	NA
Capsule1_04161522	57274	2029	13	3	3	8622	7422	38.32	0	11	8	0	0	0	0	0	0	0	0	0	2	0	0	2	2	6	0.25	3	0	0	3	1	8622	0	8622	0	1	0.25	virus-like	NA	0	0	0	0	0	Low-quality	11.24	HMM-based (lower-bound)	NA
Capsule1_18080512	132287	3751	14	3	3	15636	14436	47.08	0	11	23	0	0	0	0	0	0	0	0	0	6	1	1	6	7	15	0.304348	2	1	0	3	1	8606	7030	15636	0	1	0.304348	virus-like	NA	0	2	1	0	0	Low-quality	43.22	AAI-based (high-confidence)	NA
Capsule1_21110709	217320	2110	3	1	1	8586	8186	40.42	0	11	16	0	0	0	0	0	0	0	0	0	1	0	5	1	1	10	0.0625	1	0	0	1	1	8586	0	8586	0	1	0.0625	virus-like	NA	0	3	0	0	0	Low-quality	9.84	AAI-based (high-confidence)	NA
Capsule1_04051609	94106	1906	6	3	3	9653	8453	49.07	0	11	8	0	0	0	0	0	0	0	0	0	3	0	4	3	3	1	0.375	2	1	0	3	1	8520	1133	9653	0	1	0.375	virus-like	NA	0	5	0	0	0	Medium-quality	65.54	AAI-based (high-confidence)	NA
Capsule1_08230813	2108	1104	15	2	2	8367	7567	40.17	0	11	9	0	0	0	0	0	0	0	0	0	4	1	3	4	5	1	0.555556	2	0	0	2	1	8367	0	8367	0	1	0.555556	virus-like	NA	0	4	0	0	0	Low-quality	19.98	AAI-based (high-confidence)	NA
Capsule1_05191918	2338	1129	35	3	3	8337	7137	38.04	0	11	13	0	0	0	0	0	0	0	0	0	3	0	1	3	3	9	0.230769	3	0	0	3	1	8337	0	8337	0	1	0.230769	virus-like	NA	0	2	0	0	0	Low-quality	14.27	AAI-based (high-confidence)	NA
Capsule1_12071009	7765	2664	27	8	8	16690	13490	48.16	0	11	24	0	0	0	0	0	0	0	0	0	2	0	3	2	2	19	0.0833333	3	5	0	8	1	8337	8353	16690	0	1	0.0833333	virus-like	NA	0	1	1	0	0	Low-quality	27.99	AAI-based (medium-confidence)	NA
Capsule1_02170814	114524	2128	10	3	3	9393	8193	38.18	0	11	13	0	0	0	0	0	0	0	0	0	1	0	3	1	1	9	0.0769231	2	1	0	3	1	8299	1094	9393	0	1	0.0769231	virus-like	NA	0	0	0	0	0	Low-quality	32.72	AAI-based (high-confidence)	NA
Capsule1_02121208	20915	2295	16	5	5	10450	8450	42.32	0	11	14	0	0	0	0	0	0	0	0	0	5	1	2	5	6	6	0.428571	4	1	0	5	1	8283	1901	10184	0	0.974545	0.439765	virus-like	NA	0	6	0	1	0	Low-quality	29.06	AAI-based (medium-confidence)	NA
Capsule1_15100201	57754	2359	13	4	4	8269	6669	31.77	0	11	16	0	0	0	0	0	0	0	0	0	7	0	1	7	7	8	0.4375	4	0	0	4	1	8269	0	8269	0	1	0.4375	virus-like	NA	0	1	3	1	1	Low-quality	27.62	AAI-based (high-confidence)	NA
Capsule1_23030700	97782	3573	29	9	9	17026	13426	34.93	0	11	23	0	0	0	0	0	0	0	0	0	1	0	3	1	1	19	0.0434783	4	3	2	7	0.777778	8225	5412	13637	3389	0.800951	0.0542833	virus-like	NA	0	3	0	0	0	Low-quality	29.27	AAI-based (medium-confidence)	NA
Capsule1_19171323	185477	2683	12	2	2	14448	13648	28.84	0	11	27	0	0	0	0	0	0	0	0	2	6	0	4	8	8	15	0.296296	1	1	0	2	1	8220	6228	14448	0	1	0.296296	virus-like	NA	1	4	0	4	0	Low-quality	32.54	AAI-based (high-confidence)	NA
Capsule1_11071922	128225	4955	17	8	8	23592	20392	45.3	0	11	34	0	0	0	0	0	0	0	0	2	5	0	2	7	7	25	0.205882	4	4	0	8	1	8199	15393	23592	0	1	0.205882	virus-like	NA	1	2	1	0	0	Medium-quality	60.41	AAI-based (high-confidence)	NA
Capsule1_03211204	15853	2368	5	3	3	14368	13168	47.27	0	11	14	0	0	0	0	0	0	0	0	0	2	1	8	2	3	3	0.214286	1	2	0	3	1	8195	6173	14368	0	1	0.214286	virus-like	NA	0	8	0	0	1	Low-quality	31.2	AAI-based (high-confidence)	NA
Capsule1_07041200	104754	2573	25	6	6	13332	10932	34.95	0	11	18	0	0	0	0	0	0	0	0	0	2	0	5	2	2	11	0.111111	3	3	0	6	1	8117	5215	13332	0	1	0.111111	virus-like	NA	0	0	1	1	0	Low-quality	21.42	AAI-based (high-confidence)	NA
Capsule1_13070219	73591	1908	14	5	5	9587	7587	31.94	0	11	16	0	0	0	0	0	0	0	0	0	7	0	3	7	7	6	0.4375	4	1	0	5	1	8108	1479	9587	0	1	0.4375	virus-like	NA	0	4	0	2	1	Low-quality	24.48	AAI-based (high-confidence)	NA
Capsule1_10081500	144365	3737	24	5	5	18701	16701	51.76	0	11	19	0	0	0	0	0	0	0	0	0	3	0	4	3	3	12	0.157895	2	3	0	5	1	8105	10596	18701	0	1	0.157895	virus-like	NA	0	5	0	0	0	Low-quality	39.78	AAI-based (medium-confidence)	NA
Capsule1_03191621	82128	2006	6	2	2	8074	7274	35.39	0	11	9	0	0	0	0	0	0	0	0	0	1	0	2	1	1	6	0.111111	2	0	0	2	1	8074	0	8074	0	1	0.111111	virus-like	NA	0	2	0	0	0	Low-quality	15.05	AAI-based (high-confidence)	NA
Capsule1_08232309	150210	1804	7	4	4	9373	7773	45.04	0	11	13	0	0	0	0	0	0	0	0	0	1	0	5	1	1	7	0.0769231	3	1	0	4	1	8054	1319	9373	0	1	0.0769231	virus-like	NA	0	5	0	0	0	Medium-quality	58.84	AAI-based (high-confidence)	NA
Capsule1_11020212	77603	2455	28	3	3	8049	6849	40.5	0	11	16	0	0	0	0	0	0	0	0	0	0	2	4	0	2	10	0.125	3	0	0	3	1	8049	0	8049	0	1	0.125	virus-like	NA	0	1	0	0	0	Low-quality	4.24	AAI-based (high-confidence)	NA
Capsule1_11190909	3861	1714	40	4	4	12324	10724	38.1	0	11	11	0	0	0	0	0	0	0	0	0	1	0	2	1	1	8	0.0909091	2	2	0	4	1	8006	4318	12324	0	1	0.0909091	virus-like	NA	0	0	0	0	0	Low-quality	22.58	AAI-based (high-confidence)	NA
Capsule1_06220022	59475	1944	8	2	2	7974	7174	31.7	0	11	21	0	0	0	0	0	0	0	0	0	5	0	2	5	5	14	0.238095	2	0	0	2	1	7974	0	7974	0	1	0.238095	virus-like	NA	0	3	0	0	1	Low-quality	25.31	AAI-based (high-confidence)	NA
Capsule1_13042119	45950	2000	8	1	1	7971	7571	46.61	0	11	9	0	0	0	0	0	0	0	0	0	0	0	4	0	0	5	0	1	0	0	1	1	7971	0	7971	0	1	0	virus-like	NA	0	4	0	0	0	Medium-quality	53.98	AAI-based (high-confidence)	NA
Capsule1_05042000	85105	2137	13	6	6	20040	17640	47.1	0	11	18	0	0	0	0	0	0	0	0	0	2	0	2	2	2	14	0.111111	1	5	0	6	1	7914	12126	20040	0	1	0.111111	virus-like	NA	0	2	0	0	0	Low-quality	43.96	AAI-based (high-confidence)	NA
Capsule1_13230709	390204	3528	11	4	4	18626	17026	44.5	0	11	28	0	0	0	0	0	0	0	0	1	5	0	3	6	6	19	0.214286	1	2	1	3	0.75	7890	7441	15331	3295	0.823097	0.260341	virus-like	NA	0	5	0	1	0	Low-quality	34.87	AAI-based (medium-confidence)	NA
Capsule1_12232112	41254	2643	10	5	5	14146	12146	68.37	0	11	21	0	0	0	0	0	0	0	0	0	2	1	3	2	3	15	0.142857	2	3	0	5	1	7870	6276	14146	0	1	0.142857	virus-like	NA	0	1	2	0	0	Low-quality	14.43	HMM-based (lower-bound)	NA
Capsule1_11110018	2622	1330	14	4	4	12707	11107	35.89	0	11	11	0	0	0	0	0	0	0	0	0	3	1	2	3	4	5	0.363636	1	3	0	4	1	7853	4854	12707	0	1	0.363636	virus-like	NA	0	6	0	0	1	Low-quality	19.78	AAI-based (medium-confidence)	NA
Capsule1_21171321	11989	1295	4	2	2	7828	7028	39.68	0	11	16	0	0	0	0	0	0	0	0	0	3	1	1	3	4	11	0.25	2	0	0	2	1	7828	0	7828	0	1	0.25	virus-like	NA	1	1	0	1	0	Medium-quality	52.71	AAI-based (high-confidence)	NA
Capsule1_20052312	195980	3257	23	6	6	13213	10813	49.01	0	11	13	0	0	0	0	0	0	0	0	0	4	0	0	4	4	9	0.307692	3	3	0	6	1	7814	5399	13213	0	1	0.307692	virus-like	NA	0	1	0	0	0	Low-quality	37.11	AAI-based (medium-confidence)	NA
Capsule1_03051012	20563	1591	11	3	3	10455	9255	34.72	0	11	13	0	0	0	0	0	0	0	0	0	3	0	0	3	3	10	0.230769	2	1	0	3	1	7807	2648	10455	0	1	0.230769	virus-like	NA	0	2	0	0	0	Low-quality	32.34	AAI-based (high-confidence)	high kmer_freq may indicate large duplication
Capsule1_09171310	193501	1594	14	4	4	7726	6126	33.92	0	11	15	0	0	0	0	0	0	0	0	1	0	0	1	1	1	13	0.0666667	4	0	0	4	1	7726	0	7726	0	1	0.0666667	virus-like	NA	1	1	0	0	0	Low-quality	15.11	AAI-based (high-confidence)	NA
Capsule1_19000107	213463	3794	15	4	4	19676	18076	37.53	0	11	13	0	0	0	0	0	0	0	0	0	2	0	3	2	2	8	0.153846	1	2	1	3	0.75	7709	7787	15496	4180	0.787558	0.195346	virus-like	NA	0	2	0	0	0	Low-quality	24.69	AAI-based (medium-confidence)	NA
Capsule1_05050713	212566	2211	12	3	3	8881	7681	39.86	0	11	9	0	0	0	0	0	0	0	0	0	4	0	1	4	4	4	0.444444	2	1	0	3	1	7707	1174	8881	0	1	0.444444	virus-like	NA	0	1	0	0	0	Low-quality	14.57	AAI-based (high-confidence)	NA
Capsule1_09170708	2573	1336	23	3	3	8762	7562	31.62	0	11	14	0	0	0	0	0	0	0	0	0	4	0	1	4	4	9	0.285714	2	1	0	3	1	7696	1066	8762	0	1	0.285714	virus-like	NA	0	4	0	0	0	Low-quality	27.21	AAI-based (high-confidence)	NA
Capsule1_15022317	164745	3449	10	6	6	16595	14195	40.41	0	11	17	0	0	0	0	0	0	0	0	0	2	0	2	2	2	13	0.117647	2	4	0	6	1	7673	8922	16595	0	1	0.117647	virus-like	NA	0	2	0	0	0	Low-quality	43.03	AAI-based (high-confidence)	NA
Capsule1_13001813	375886	3306	17	5	5	14921	12921	44.96	0	11	19	0	0	0	0	0	0	0	0	0	1	0	3	1	1	15	0.0526316	3	1	1	4	0.8	7643	4851	12494	2427	0.837343	0.0628554	virus-like	NA	0	1	0	2	1	Low-quality	44.01	AAI-based (high-confidence)	NA
Capsule1_11112016	1912	957	31	3	3	7629	6429	35.81	0	11	10	0	0	0	0	0	0	0	0	0	1	1	1	1	2	7	0.2	3	0	0	3	1	7629	0	7629	0	1	0.2	virus-like	NA	0	1	0	0	0	Low-quality	14.75	AAI-based (high-confidence)	no viral genes detected
Capsule1_12211521	114825	1319	11	4	4	10187	8587	45.63	0	1	23	0	0	0	0	0	0	0	0	0	1	3	2	1	4	17	0.173913	2	2	0	4	1	7615	2572	10187	0	1	0.173913	virus-like	NA	0	0	0	0	0	Low-quality	19.87	AAI-based (high-confidence)	high kmer_freq may indicate large duplication
Capsule1_01082013	2992	1478	18	2	2	7608	6808	51.94	0	11	8	0	0	0	0	0	0	0	0	0	7	0	0	7	7	1	0.875	2	0	0	2	1	7608	0	7608	0	1	0.875	virus-like	NA	0	3	0	0	0	Low-quality	21.55	AAI-based (high-confidence)	NA
Capsule1_15102112	90089	3405	21	3	3	18859	17659	51.74	0	11	24	0	0	0	0	0	0	0	0	0	2	0	8	2	2	14	0.0833333	2	1	0	3	1	7590	11269	18859	0	1	0.0833333	virus-like	NA	0	6	0	2	0	Low-quality	19.9	HMM-based (lower-bound)	NA
Capsule1_02070716	82808	1679	8	3	3	7576	6376	30.07	0	11	13	0	0	0	0	0	0	0	0	0	4	0	0	4	4	9	0.307692	3	0	0	3	1	7576	0	7576	0	1	0.307692	virus-like	NA	0	2	0	0	0	Low-quality	23.6	AAI-based (high-confidence)	NA
Capsule1_12190523	39706	3541	12	5	5	16459	14459	63.43	0	11	27	0	0	0	0	0	0	0	0	0	15	0	1	15	15	11	0.555556	1	2	2	3	0.6	7529	6269	13798	2661	0.838326	0.662697	virus-like	NA	0	5	1	0	0	Low-quality	36.47	AAI-based (medium-confidence)	NA
Capsule1_16092003	2139	926	26	1	1	7472	7072	40.85	0	11	9	0	0	0	0	0	0	0	0	0	3	0	2	3	3	4	0.333333	1	0	0	1	1	7472	0	7472	0	1	0.333333	virus-like	NA	0	3	0	0	0	Low-quality	11.54	AAI-based (medium-confidence)	NA
Capsule1_06110015	88923	4487	22	10	10	28155	24155	64.87	0	11	42	0	0	0	0	0	0	0	0	1	8	0	1	9	9	32	0.214286	2	7	1	9	0.9	7410	18726	26136	1195	0.92829	0.230839	virus-like	NA	0	3	0	0	0	Low-quality	32.83	HMM-based (lower-bound)	NA
Capsule1_00230012	78270	2545	15	6	6	11707	9307	33.4	0	11	17	0	0	0	0	0	0	0	0	0	5	0	6	5	5	6	0.294118	3	3	0	6	1	7409	4298	11707	0	1	0.294118	virus-like	NA	0	10	0	0	0	Low-quality	31.97	AAI-based (high-confidence)	NA
Capsule1_15200311	139163	1704	3	2	2	9007	8207	44.6	0	11	9	0	0	0	0	0	0	0	0	0	3	0	4	3	3	2	0.333333	1	1	0	2	1	7407	1600	9007	0	1	0.333333	virus-like	NA	0	2	0	0	0	Low-quality	20.07	AAI-based (high-confidence)	NA
Capsule1_13022012	101178	1691	3	1	1	7325	6925	48.14	0	11	8	0	0	0	0	0	0	0	0	0	2	0	0	2	2	6	0.25	1	0	0	1	1	7325	0	7325	0	1	0.25	virus-like	NA	0	1	0	0	0	Low-quality	11.97	AAI-based (high-confidence)	NA
Capsule1_01021210	69194	1617	13	5	5	8802	6802	46.13	0	11	13	0	0	0	0	0	0	0	0	2	3	0	1	5	5	7	0.384615	4	1	0	5	1	7312	1490	8802	0	1	0.384615	virus-like	NA	0	3	0	1	1	Low-quality	28.95	AAI-based (high-confidence)	NA
Capsule1_02200606	98561	3103	27	7	7	14096	11296	49.08	0	11	18	0	0	0	0	0	0	0	0	0	2	0	2	2	2	14	0.111111	3	3	1	6	0.857143	7310	5091	12401	1695	0.879753	0.126298	virus-like	NA	0	2	0	0	0	Low-quality	24.99	HMM-based (lower-bound)	NA
Capsule1_12150723	79282	3004	17	5	5	16910	14910	53.75	0	11	21	0	0	0	0	0	0	0	0	0	4	0	3	4	4	14	0.190476	2	1	2	3	0.6	7307	7224	14531	2379	0.859314	0.221661	virus-like	NA	0	3	0	0	0	Low-quality	36.65	AAI-based (high-confidence)	NA
Capsule1_21231009	132163	2571	28	4	4	8453	6853	41.32	0	11	14	0	0	0	0	0	0	0	0	0	1	0	3	1	1	10	0.0714286	3	1	0	4	1	7204	1249	8453	0	1	0.0714286	virus-like	NA	0	2	1	1	0	Low-quality	26.9	AAI-based (high-confidence)	NA
Capsule1_00130320	87226	2675	18	3	3	9472	8272	36.01	0	11	11	0	0	0	0	0	0	0	0	0	4	0	2	4	4	5	0.363636	1	2	0	3	1	7096	2376	9472	0	1	0.363636	virus-like	NA	0	3	0	0	0	Low-quality	29.73	AAI-based (medium-confidence)	NA
Capsule1_08131109	128969	2740	26	7	7	10344	7544	55.62	0	11	19	0	0	0	0	0	0	0	0	0	6	0	3	6	6	10	0.315789	5	2	0	7	1	7052	3292	10344	0	1	0.315789	virus-like	NA	0	4	0	0	1	Low-quality	26.36	AAI-based (medium-confidence)	NA
Capsule1_01110215	5995	1858	5	2	2	9926	9126	61.33	0	11	7	0	0	0	0	0	0	0	0	0	4	0	0	4	4	3	0.571429	1	1	0	2	1	6984	2942	9926	0	1	0.571429	virus-like	NA	0	1	0	0	0	Low-quality	20.45	HMM-based (lower-bound)	NA
Capsule1_03051806	185453	2411	15	3	3	7983	6783	51.07	0	11	11	0	0	0	0	0	0	0	0	0	2	0	4	2	2	5	0.181818	2	1	0	3	1	6962	1021	7983	0	1	0.181818	virus-like	NA	0	6	0	0	0	Low-quality	24.42	AAI-based (medium-confidence)	NA
Capsule1_13111500	114365	2717	5	3	3	13743	12543	28.79	0	11	17	0	0	0	0	0	0	0	0	0	1	2	1	1	3	13	0.176471	1	1	1	2	0.666667	6961	5641	12602	1141	0.916976	0.192448	virus-like	NA	0	0	0	0	0	Low-quality	16.23	HMM-based (lower-bound)	NA
Capsule1_13032301	4349	1506	11	3	3	6889	5689	42.42	0	11	13	0	0	0	0	0	0	0	0	0	2	0	0	2	2	11	0.153846	3	0	0	3	1	6889	0	6889	0	1	0.153846	virus-like	NA	0	0	0	1	0	Low-quality	3.51	HMM-based (lower-bound)	NA
Capsule1_09230003	4233	1716	72	4	4	10262	8662	38.95	0	11	12	0	0	0	0	0	0	0	0	0	2	0	3	2	2	7	0.166667	2	2	0	4	1	6875	3387	10262	0	1	0.166667	virus-like	NA	0	1	0	0	1	Low-quality	5.74	AAI-based (medium-confidence)	NA
Capsule1_09202316	78232	1918	4	2	2	7863	7063	35.93	0	11	6	0	0	0	0	0	0	0	0	0	0	0	1	0	0	5	0	1	1	0	2	1	6816	1047	7863	0	1	0	virus-like	NA	0	0	0	0	0	Not-determined	0	NA	no viral genes detected
Capsule1_07161401	23499	1852	17	2	2	9405	8605	35.25	0	11	15	0	0	0	0	0	0	0	0	0	2	0	2	2	2	11	0.133333	1	1	0	2	1	6735	2670	9405	0	1	0.133333	virus-like	NA	0	0	0	0	0	Low-quality	24.22	AAI-based (medium-confidence)	NA
Capsule1_00081806	107318	1679	12	3	3	7797	6597	37.21	0	11	11	0	0	0	0	0	0	0	0	0	6	4	0	6	10	1	0.909091	2	1	0	3	1	6707	1090	7797	0	1	0.909091	virus-like	NA	0	0	0	0	0	Low-quality	4.16	AAI-based (high-confidence)	high kmer_freq may indicate large duplication
Capsule1_05160319	67688	1593	13	3	3	6690	5490	42.35	0	11	10	0	0	0	0	0	0	0	0	0	4	0	1	4	4	5	0.4	3	0	0	3	1	6690	0	6690	0	1	0.4	virus-like	NA	0	1	1	0	1	Low-quality	21.32	AAI-based (high-confidence)	NA
Capsule1_05101506	81131	2359	19	5	5	8153	6153	37.9	0	11	16	0	0	0	0	0	0	0	0	0	5	0	1	5	5	10	0.3125	4	1	0	5	1	6667	1486	8153	0	1	0.3125	virus-like	NA	0	2	0	0	0	Low-quality	29.63	AAI-based (high-confidence)	NA
Capsule1_01171220	15423	1513	11	3	3	7989	6789	34.29	0	11	14	0	0	0	0	0	0	0	0	0	2	2	0	2	4	10	0.285714	2	1	0	3	1	6622	1367	7989	0	1	0.285714	virus-like	NA	0	0	0	0	0	Low-quality	7.68	HMM-based (lower-bound)	NA
Capsule1_03030206	7408	1360	1	1	1	6613	6213	40.77	0	11	11	0	0	0	0	0	0	0	0	0	3	0	2	3	3	6	0.272727	1	0	0	1	1	6613	0	6613	0	1	0.272727	virus-like	NA	0	4	0	0	0	Low-quality	19.46	AAI-based (high-confidence)	NA
Capsule1_17091014	111949	2131	7	3	3	9022	7822	47.95	0	11	10	0	0	0	0	0	0	0	0	0	3	0	2	3	3	5	0.3	2	1	0	3	1	6594	2428	9022	0	1	0.3	virus-like	NA	0	4	0	0	0	Medium-quality	61.09	AAI-based (high-confidence)	NA
Capsule1_14170417	233188	2264	12	5	5	8886	6886	47.33	0	11	16	0	0	0	0	0	0	0	0	0	4	0	2	4	4	10	0.25	3	1	1	4	0.8	6544	1287	7831	1055	0.881274	0.28368	virus-like	NA	0	4	0	0	0	Low-quality	49.77	AAI-based (high-confidence)	NA
Capsule1_12081612	139970	4184	23	5	5	20067	18067	36.31	0	11	32	0	0	0	0	0	0	0	0	4	4	1	6	8	9	17	0.28125	2	3	0	5	1	6523	13544	20067	0	1	0.28125	virus-like	NA	1	4	2	0	1	Low-quality	18.65	HMM-based (lower-bound)	NA
Capsule1_01050800	2671	1278	14	3	3	7977	6777	33.29	0	11	10	0	0	0	0	0	0	0	0	0	0	0	3	0	0	7	0	2	1	0	3	1	6516	1461	7977	0	1	0	virus-like	NA	0	3	0	0	0	Low-quality	18.64	AAI-based (medium-confidence)	NA
Capsule1_09110303	182822	3979	20	8	8	23782	20582	32.7	0	11	31	0	0	0	0	0	0	0	0	0	3	0	4	3	3	24	0.0967742	2	5	1	7	0.875	6488	15153	21641	2141	0.909974	0.106348	virus-like	NA	0	3	0	0	0	Low-quality	14.58	AAI-based (medium-confidence)	NA
Capsule1_13230813	2864	1484	19	2	2	13256	12456	40.17	0	11	13	0	0	0	0	0	0	0	0	0	5	1	5	5	6	2	0.461538	1	1	0	2	1	6487	6769	13256	0	1	0.461538	virus-like	NA	0	5	0	0	0	Low-quality	31.76	AAI-based (high-confidence)	NA
Capsule1_23070821	128538	1904	5	3	3	9350	8150	64.93	0	11	18	0	0	0	0	0	0	0	0	1	2	0	3	3	3	12	0.166667	2	1	0	3	1	6485	2865	9350	0	1	0.166667	virus-like	NA	0	4	0	1	0	Low-quality	11.51	HMM-based (lower-bound)	NA
Capsule1_07230813	1444	769	9	1	1	6480	6080	40.62	0	11	6	0	0	0	0	0	0	0	0	0	2	1	3	2	3	0	0.5	1	0	0	1	1	6480	0	6480	0	1	0.5	virus-like	NA	0	3	0	0	0	Low-quality	15.43	AAI-based (high-confidence)	NA
Capsule1_00210217	238767	2642	19	5	5	8273	6273	52.46	0	11	10	0	0	0	0	0	0	0	0	0	3	0	4	3	3	3	0.3	4	1	0	5	1	6467	1806	8273	0	1	0.3	virus-like	NA	0	3	1	0	0	Low-quality	13.26	AAI-based (medium-confidence)	NA
Capsule1_16010115	38542	4966	35	7	7	33993	31193	36.88	0	11	57	0	0	0	0	0	0	0	0	0	0	5	1	0	5	51	0.0877193	2	5	0	7	1	6465	27528	33993	0	1	0.0877193	virus-like	NA	0	2	1	0	0	Low-quality	4.73	AAI-based (medium-confidence)	NA
Capsule1_15230016	50464	2234	12	6	6	10420	8020	37.46	0	11	20	0	0	0	0	0	0	0	0	0	5	1	2	5	6	12	0.3	3	2	1	5	0.833333	6444	2568	9012	1408	0.864875	0.346871	virus-like	NA	0	2	0	0	0	Low-quality	25.34	AAI-based (high-confidence)	NA
Capsule1_00110120	120135	2013	21	4	4	8069	6469	31.69	0	11	11	0	0	0	0	0	0	0	0	0	0	1	0	0	1	10	0.0909091	3	1	0	4	1	6435	1634	8069	0	1	0.0909091	virus-like	NA	0	1	0	0	0	Low-quality	5.41	AAI-based (high-confidence)	NA
Capsule1_09021506	2932	1304	46	6	6	12255	9855	36.01	0	11	15	0	0	0	0	0	0	0	0	1	0	0	2	1	1	12	0.0666667	2	4	0	6	1	6435	5820	12255	0	1	0.0666667	virus-like	NA	0	1	1	0	0	Low-quality	6.21	HMM-based (lower-bound)	NA
Capsule1_04050021	387874	2858	3	3	3	12700	11500	40.73	0	11	27	0	0	0	0	0	0	0	0	0	1	0	1	1	1	25	0.037037	1	2	0	3	1	6429	6271	12700	0	1	0.037037	virus-like	NA	0	1	0	0	0	Low-quality	23.1	HMM-based (lower-bound)	NA
Capsule1_06230222	3650	1520	7	5	5	13017	11017	32.66	0	11	13	0	0	0	0	0	0	0	0	0	3	0	6	3	3	4	0.230769	1	3	1	4	0.8	6398	5264	11662	1355	0.895905	0.257582	virus-like	NA	0	5	0	0	0	Low-quality	33.09	AAI-based (high-confidence)	NA
Capsule1_12110512	50662	1689	11	3	3	6334	5134	29.65	0	11	10	0	0	0	0	0	0	0	0	1	1	0	0	2	2	8	0.2	3	0	0	3	1	6334	0	6334	0	1	0.2	virus-like	NA	0	1	0	0	0	Low-quality	5.36	AAI-based (medium-confidence)	no viral genes detected
Capsule1_19201805	144125	1481	3	2	2	6291	5491	34.42	0	11	14	0	0	0	0	0	0	0	0	0	2	0	2	2	2	10	0.142857	2	0	0	2	1	6291	0	6291	0	1	0.142857	virus-like	NA	0	2	0	0	0	Low-quality	8.36	HMM-based (lower-bound)	NA
Capsule1_04111318	219224	5490	30	9	9	33615	30015	51.78	0	11	58	0	0	0	0	0	0	0	0	1	12	0	6	13	13	39	0.224138	3	5	1	8	0.888889	6283	26089	32372	1243	0.963022	0.232744	virus-like	NA	0	4	2	1	1	Medium-quality	55.38	AAI-based (high-confidence)	NA
Capsule1_01190722	183372	4863	13	3	3	24192	22992	48.96	0	11	32	0	0	0	0	0	0	0	0	0	8	0	3	8	8	21	0.25	2	1	0	3	1	6265	17927	24192	0	1	0.25	virus-like	NA	1	3	0	0	0	Medium-quality	53.43	AAI-based (medium-confidence)	NA
Capsule1_02110320	143428	1863	9	2	2	6262	5462	39.36	0	11	6	0	0	0	0	0	0	0	0	0	0	0	3	0	0	3	0	2	0	0	2	1	6262	0	6262	0	1	0	virus-like	NA	0	3	0	0	0	Low-quality	3.8	AAI-based (medium-confidence)	NA
Capsule1_23221216	195879	5472	28	5	5	22736	20736	50	0	11	27	0	0	0	0	0	0	0	0	0	4	0	3	4	4	20	0.148148	1	4	0	5	1	6243	16493	22736	0	1	0.148148	virus-like	NA	0	3	0	1	0	Low-quality	36.7	AAI-based (medium-confidence)	NA
Capsule1_05080518	117768	2156	10	3	3	7439	6239	32.86	0	11	9	0	0	0	0	0	0	0	0	0	3	0	2	3	3	4	0.333333	2	1	0	3	1	6183	1256	7439	0	1	0.333333	virus-like	NA	0	1	0	0	0	Low-quality	22.61	AAI-based (medium-confidence)	NA
Capsule1_08080220	44169	1443	13	3	3	9634	8434	44.81	0	11	11	0	0	0	0	0	0	0	0	0	2	0	0	2	2	9	0.181818	1	2	0	3	1	6048	3586	9634	0	1	0.181818	virus-like	NA	0	0	0	0	0	Low-quality	16.42	AAI-based (medium-confidence)	high kmer_freq may indicate large duplication
Capsule1_15020319	125037	3943	20	8	8	17542	14342	37.64	0	11	18	0	0	0	0	0	0	0	0	0	3	2	0	3	5	13	0.277778	2	6	0	8	1	6033	11509	17542	0	1	0.277778	virus-like	NA	0	1	0	0	0	Low-quality	17.44	AAI-based (medium-confidence)	NA
Capsule1_03081109	160515	4940	28	7	7	22769	19969	56.16	0	11	29	0	0	0	0	0	0	0	0	0	4	1	5	4	5	19	0.172414	2	5	0	7	1	6013	16756	22769	0	1	0.172414	virus-like	NA	0	1	0	1	0	Low-quality	31.48	AAI-based (medium-confidence)	NA
Capsule1_22110208	82272	2399	13	7	7	11488	8688	40.56	0	11	17	0	0	0	0	0	0	0	0	0	2	0	5	2	2	10	0.117647	3	4	0	7	1	5970	5518	11488	0	1	0.117647	virus-like	NA	1	3	2	0	0	Low-quality	24.18	AAI-based (medium-confidence)	NA
Capsule1_17141818	229082	1655	8	3	3	5821	4621	40.12	0	11	7	0	0	0	0	0	0	0	0	0	1	0	4	1	1	2	0.142857	3	0	0	3	1	5821	0	5821	0	1	0.142857	virus-like	NA	0	2	0	0	0	Low-quality	10.92	AAI-based (medium-confidence)	NA
Capsule1_09050615	26803	1409	10	1	1	5815	5415	40.46	0	11	4	0	0	0	0	0	0	0	0	0	2	0	2	2	2	0	0.5	1	0	0	1	1	5815	0	5815	0	1	0.5	virus-like	NA	0	4	0	0	0	Low-quality	8.38	HMM-based (lower-bound)	high kmer_freq may indicate large duplication; low-confidence ITR
Capsule1_00100203	260335	1724	12	3	3	5785	4585	41.83	0	11	9	0	0	0	0	0	0	0	0	0	0	0	3	0	0	6	0	3	0	0	3	1	5785	0	5785	0	1	0	virus-like	NA	0	2	0	0	0	Low-quality	6.18	HMM-based (lower-bound)	NA
Capsule1_04092003	2341	1024	43	5	5	7156	5156	40.13	0	11	11	0	0	0	0	0	0	0	0	0	0	0	1	0	0	10	0	4	1	0	5	1	5773	1383	7156	0	1	0	virus-like	NA	0	1	0	0	0	Low-quality	7.35	HMM-based (lower-bound)	NA
Capsule1_22230813	1355	759	12	3	3	7196	5996	40.86	0	11	9	0	0	0	0	0	0	0	0	0	2	1	4	2	3	2	0.333333	2	1	0	3	1	5715	1481	7196	0	1	0.333333	virus-like	NA	0	4	0	0	0	Low-quality	17.47	AAI-based (high-confidence)	NA
Capsule1_06070922	88891	3629	13	6	6	18726	16326	58.62	0	11	30	0	0	0	0	0	0	0	0	0	3	0	2	3	3	25	0.1	2	1	3	3	0.5	5693	5843	11536	7190	0.616042	0.162327	virus-like	NA	0	1	0	0	0	Low-quality	15.53	HMM-based (lower-bound)	NA
Capsule1_12141119	97941	2721	14	6	6	15198	12798	53.02	0	11	27	0	0	0	0	0	0	0	0	1	1	0	4	2	2	21	0.0740741	3	0	3	3	0.5	5674	0	5674	9524	0.373339	0.19841	virus-like	NA	0	4	0	0	0	Low-quality	6.74	HMM-based (lower-bound)	NA
[truncated: 360 more rows]
[truncated: 15 more columns]

## Sheet: Table_S2 vMAG info
genome	contig_length	checkv_quality	checkv_completeness	checkv_completeness_method	checkv_warnings	virus_status	vOTU
[truncated: 20,844 more rows]

[truncated: 12 more sheets: Table_S3 cSAG vSAG info, Table_S4 co-barcode assess, Table_S5 Ecoli emSAG info, Table S6 vOTU info, Table S7 Fig3e info, Table_S8 Fig3d nucmer, Table_S9 vContact2 clusters, Table_S10 Naomivir OrthoFinder, Table_S11 coassem emSAG comp, Table_S12 coassem cSAG aln, Table_S13 Fig4c genopplot, Table_S14 DNApol vrsinpha cdhit]
